# Supplementary material for: Visible-light promoted regioselective amination and alkylation of remote C(sp3)-H bonds
Source: PubMed Central journal article supplement (PMC7081228; doi:10.1038/s41467-020-15167-2), 2020-03-19
Supplement: 41467_2020_15167_MOESM1_ESM.pdf [file 41467_2020_15167_MOESM1_ESM.pdf]

## **Supplementary Information**

# **Visible-light Promoted Regioselective Amination and Alkylation of Remote C(sp<sup>3</sup>)-H bonds**

*Guo et al.*

## Supplementary Methods

### General Information

Unless stated otherwise, all reactions were carried out under argon atmosphere. All solvents were purified and dried according to standard methods prior to use.  $^1\text{H}$  NMR,  $^{13}\text{C}$  NMR, and  $^{19}\text{F}$  NMR spectra were recorded on a Bruker instrument (300 MHz, 75MHz, and 282 MHz) spectrometer in  $\text{CDCl}_3$  using tetramethylsilane (TMS) as the internal standard unless otherwise noted. Data for  $^1\text{H}$  NMR are recorded as follows: chemical shift ( $\delta$ , ppm), multiplicity (s = singlet, d = doublet, t = triplet, m = multiplet, br = broad, q = quartet, coupling constant(s) in Hz integration). Data for  $^{13}\text{C}$  NMR and  $^{19}\text{F}$  NMR are reported in terms of chemical shift ( $\delta$ , ppm). HRMS were obtained by the ESI ionization sources. GC-MS were obtained by the EI sources.

**Materials and Methods:** Commercial grade reagents and solvents were purchased from Energy-Chemical and Inno-Chemical, and used as received without further purifications.

### Optimization of Reaction Condition A.

#### Supplementary Table 1. Photo Catalyst Screening.<sup>a,b</sup>

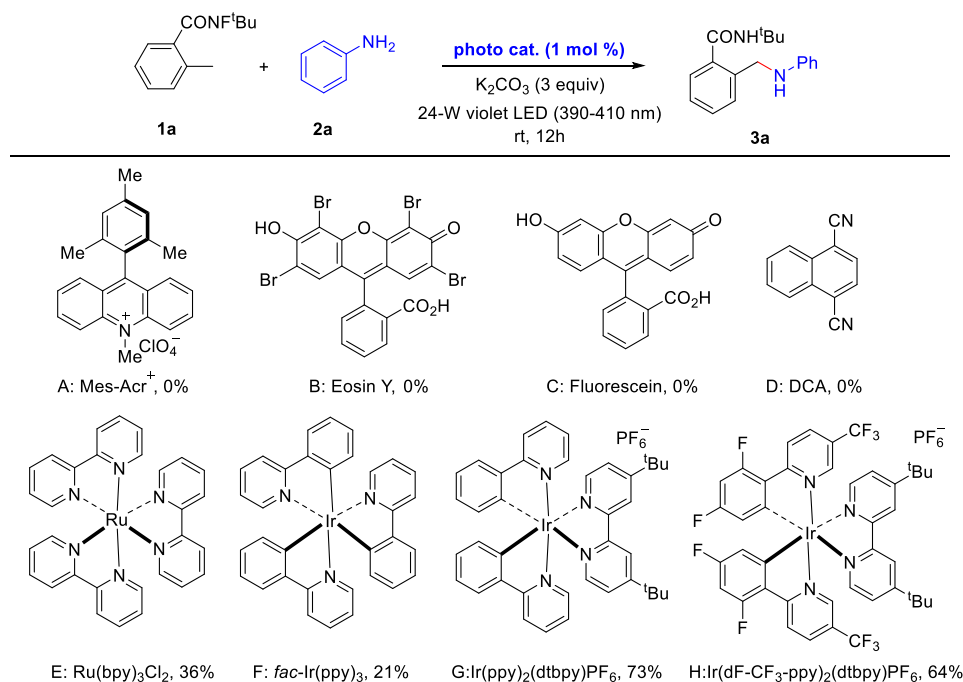

<sup>a</sup> Unless otherwise noted, the reactions were carried out by using **1a** (0.1 mmol), **2a** (3.0 equiv), photo cat. (1 mol %), DMF (1 ml),  $\text{K}_2\text{CO}_3$  (3 equiv) under Ar and stirred at room temperature for 12 h under 24-W violet LED (390-410 nm) light irradiation. <sup>b</sup> Isolated yields.

### Supplementary Table 2. Light Sources Screening.<sup>a,b</sup>

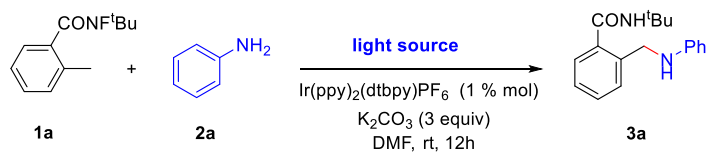

| Entry | Light source                  | Yield(%) <sup>b</sup> | Entry | Light source         | Yield(%) <sup>b</sup> |
|-------|-------------------------------|-----------------------|-------|----------------------|-----------------------|
| 1     | violet LED (24-W, 390-410 nm) | 73                    | 4     | 18-W green LED       | trace                 |
| 2     | 18-W blue LED                 | 53                    | 5     | 25-W 365 nm UV light | 19                    |
| 3     | 18-W white LED                | 21                    | 6     | 25-W 254 nm UV light | 16                    |

<sup>a</sup> **1a** (0.1 mmol), **2a** (3.0 equiv), photo cat. (1 mol %), DMF (1 ml), base (3 equiv), under Ar and stirred at room temperature for 12 h under specific light irradiation. <sup>b</sup> Isolated yields.

### Supplementary Table 3. Bases Screening.<sup>a,b</sup>

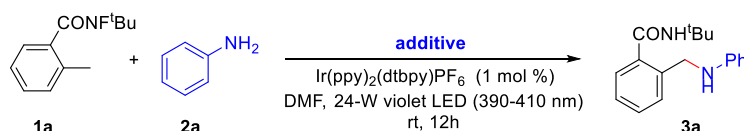

| Entry | base                            | yield(%) <sup>b</sup> | Entry | base               | yield(%) <sup>b</sup> |
|-------|---------------------------------|-----------------------|-------|--------------------|-----------------------|
| 1     | K <sub>2</sub> CO <sub>3</sub>  | 73                    | 10    | CsF                | 51                    |
| 2     | Na <sub>2</sub> CO <sub>3</sub> | 22                    | 11    | NaHCO <sub>3</sub> | 25                    |
| 3     | Cs <sub>2</sub> CO <sub>3</sub> | 35                    | 12    | KHCO <sub>3</sub>  | 27                    |
| 4     | K <sub>3</sub> PO <sub>4</sub>  | 10                    | 13    | LiOH               | 23                    |
| 5     | <i>t</i> -BuONa                 | 42                    | 14    | NaOH               | 5                     |
| 6     | <i>t</i> -BuOK                  | 15                    | 15    | DABCO              | 26                    |
| 7     | <i>t</i> -BuOLi                 | 36                    | 16    | TBACl              | 24                    |
| 8     | KOMe                            | 26                    | 17    | TBAI               | trace                 |
| 9     | NaOMe                           | 37                    |       |                    |                       |

<sup>a</sup> **1a** (0.1 mmol), **2a** (3.0 equiv), photo cat. (1 mol %), DMF (1 ml), base (3 equiv), under Ar and stirred at room temperature for 12 h under 24-W violet LED (390-410 nm) light irradiation. <sup>b</sup> Isolated yields.

### Supplementary Table 4. Solvents Screening.<sup>a,b</sup>

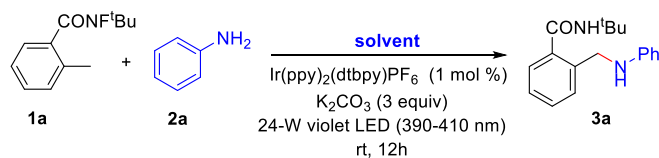

| Entry | solvent | yield (%) <sup>b</sup> | Entry | solvent          | yield (%) <sup>b</sup> |
|-------|---------|------------------------|-------|------------------|------------------------|
| 1     | DMF     | 73                     | 5     | toluene          | 37                     |
| 2     | THF     | 44                     | 6     | DMAc             | 61                     |
| 3     | DMSO    | 66                     | 7     | 1,4-dioxane      | 24                     |
| 4     | MeCN    | 22                     | 8     | H <sub>2</sub> O | trace                  |

<sup>a</sup> **1a** (0.1 mmol), **2a** (3.0 equiv), photo cat. (1 mol %), solvent (1 ml), K<sub>2</sub>CO<sub>3</sub> (3.0 equiv), under Ar and stirred at room temperature for 12 h under 24-W violet LED (390-410 nm) light irradiation. <sup>b</sup> Isolated yields.

## Optimization of Reaction Condition B.

Supplementary Table 5. Photo Catalyst Screening.<sup>a,b</sup>

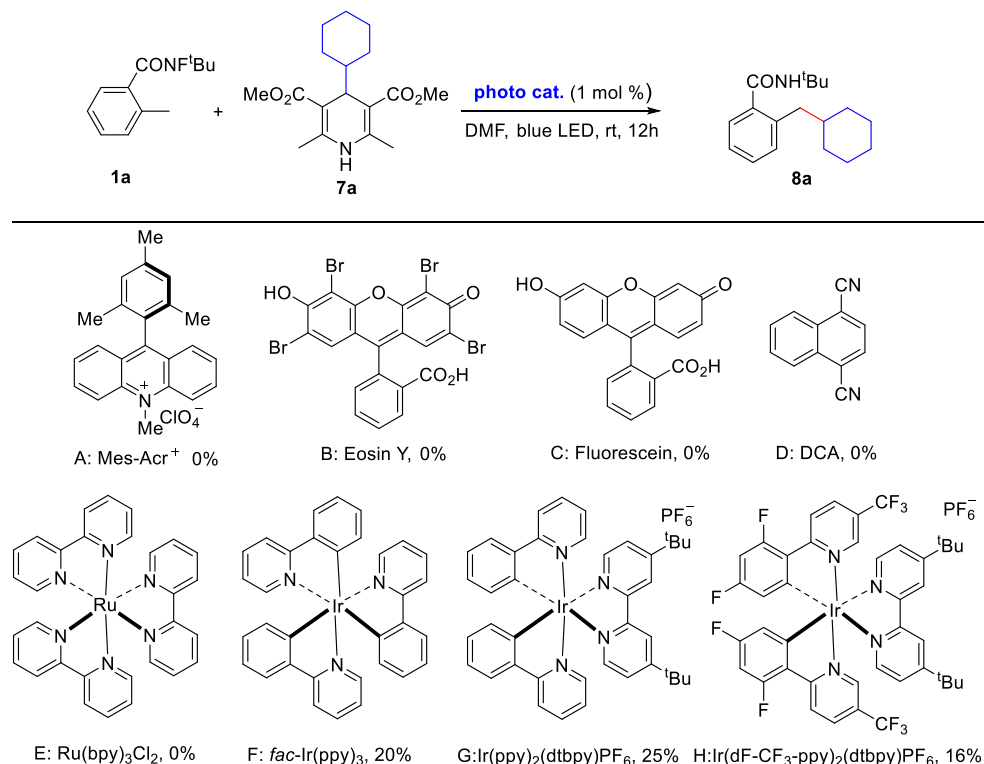

<sup>a</sup> Unless otherwise noted, the reactions were carried out by using **1a** (0.1 mmol), **7a** (2.0 equiv), photo cat. (1 mol %), DMF (1 ml), under Ar and stirred at room temperature for 12 h under 18-W blue LED light irradiation. <sup>b</sup> Isolated yields.

Supplementary Table 6. Light Sources Screening.<sup>a,b</sup>

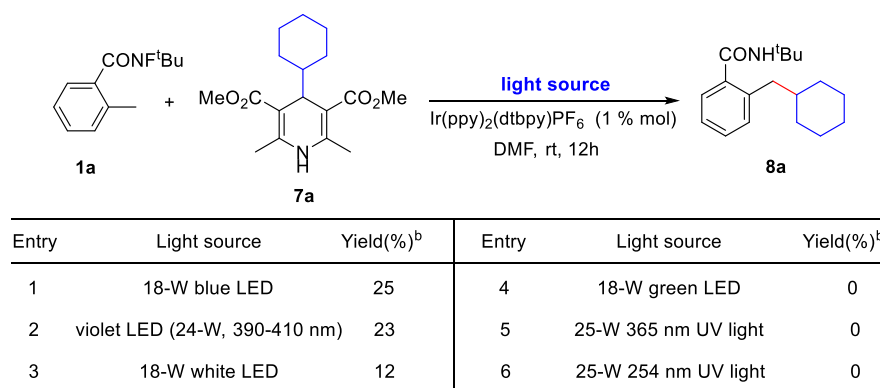

<sup>a</sup> **1a** (0.1 mmol), **7a** (2.0 equiv), Ir(ppy)<sub>2</sub>(dtbpy)PF<sub>6</sub> (1 % mol), DMF (1 ml), under Ar and stirred at room temperature with specific light irradiation. <sup>b</sup> Isolated yields.



### Supplementary Table 7. Additive Screening.<sup>a,b</sup>

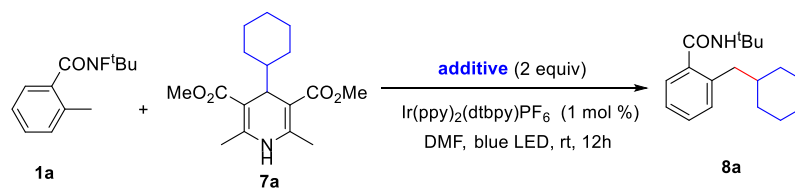

| entry | additive                        | yield(%) <sup>b</sup> | entry | additive           | yield(%) <sup>b</sup> |
|-------|---------------------------------|-----------------------|-------|--------------------|-----------------------|
| 1     | Cs <sub>2</sub> CO <sub>3</sub> | 36                    | 10    | CsF                | 26                    |
| 2     | Na <sub>2</sub> CO <sub>3</sub> | 31                    | 11    | NaHCO <sub>3</sub> | 25                    |
| 3     | K <sub>2</sub> CO <sub>3</sub>  | 35                    | 12    | KHCO <sub>3</sub>  | 24                    |
| 4     | K <sub>3</sub> PO <sub>4</sub>  | 28                    | 13    | LiOH               | 27                    |
| 5     | <i>t</i> -BuONa                 | 27                    | 14    | NaOH               | 24                    |
| 6     | <i>t</i> -BuOK                  | 35                    | 15    | DABCO              | 21                    |
| 7     | <i>t</i> -BuOLi                 | 33                    | 16    | TBACl              | 24                    |
| 8     | KOMe                            | 46                    | 17    | TBAI               | 25                    |
| 9     | NaOMe                           | 40                    |       |                    |                       |

<sup>a</sup> **1a** (0.1 mmol), **7a** (2.0 equiv), photo cat. (1 mol %), DMF (1 ml), additive (2.0 equiv), under Ar and stirred at room temperature for 12 h under 18-W blue LED light irradiation. <sup>b</sup> Isolated yields.

### Supplementary Table 8. Solvents Screening.<sup>a,b</sup>

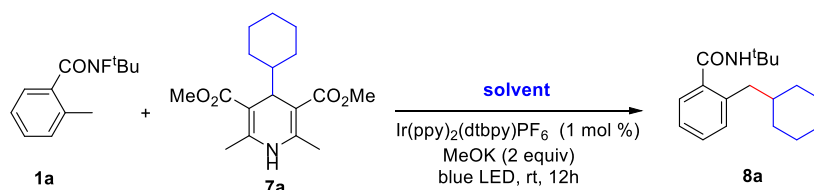

| entry | solvent | yield(%) <sup>b</sup> | entry | solvent          | yield(%) <sup>b</sup> |
|-------|---------|-----------------------|-------|------------------|-----------------------|
| 1     | DMF     | 46                    | 5     | toluene          | 35                    |
| 2     | THF     | 39                    | 6     | DMAc             | 43                    |
| 3     | DCM     | 65                    | 7     | 1,4-dioxane      | 24                    |
| 4     | MeCN    | 28                    | 8     | H <sub>2</sub> O | 13                    |

<sup>a</sup> **1a** (0.1 mmol), **7a** (2.0 equiv), photo cat. (1 mol %), solvent (1 ml), MeOK (2.0 equiv), under Ar and stirred at room temperature for 12 h under 18-W blue LED light irradiation. <sup>b</sup> Isolated yields.

### Supplementary Table 9. Control Experiments.<sup>a,b</sup>

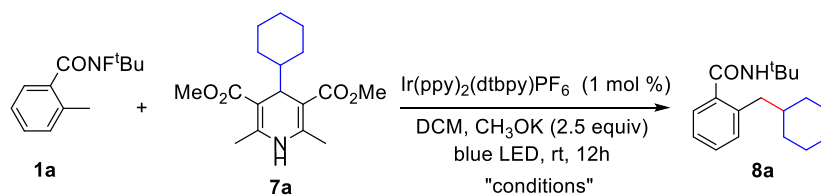

| entry | change from the "conditions"                          | yield(%) <sup>b</sup> |
|-------|-------------------------------------------------------|-----------------------|
| 1     | no change                                             | 65                    |
| 2     | CH <sub>3</sub> OK (3.0 equiv)                        | 67                    |
| 3     | CH <sub>3</sub> OK (2.5 equiv)                        | 68                    |
| 4     | CH <sub>3</sub> OK (1.0 equiv)                        | 40                    |
| 5     | CH <sub>3</sub> OK (2.5 equiv), <b>7a</b> (3.0 equiv) | 71                    |
| 6     | CH <sub>3</sub> OK (2.5 equiv), <b>7a</b> (2.5 equiv) | 68                    |
| 7     | CH <sub>3</sub> OK (2.5 equiv), <b>7a</b> (1.0 equiv) | 32                    |
| 9     | without Ir cat.                                       | 0                     |
| 10    | In the dark, 24 h at rt                               | 0                     |
| 11    | In the dark, 12 h at 80 °C                            | 0                     |

<sup>a</sup> 0.1 mmol scale. <sup>b</sup> Isolated yields.

### List of substrates.

#### Supplementary Table 10. List of *N*-fluoroamides<sup>1</sup>

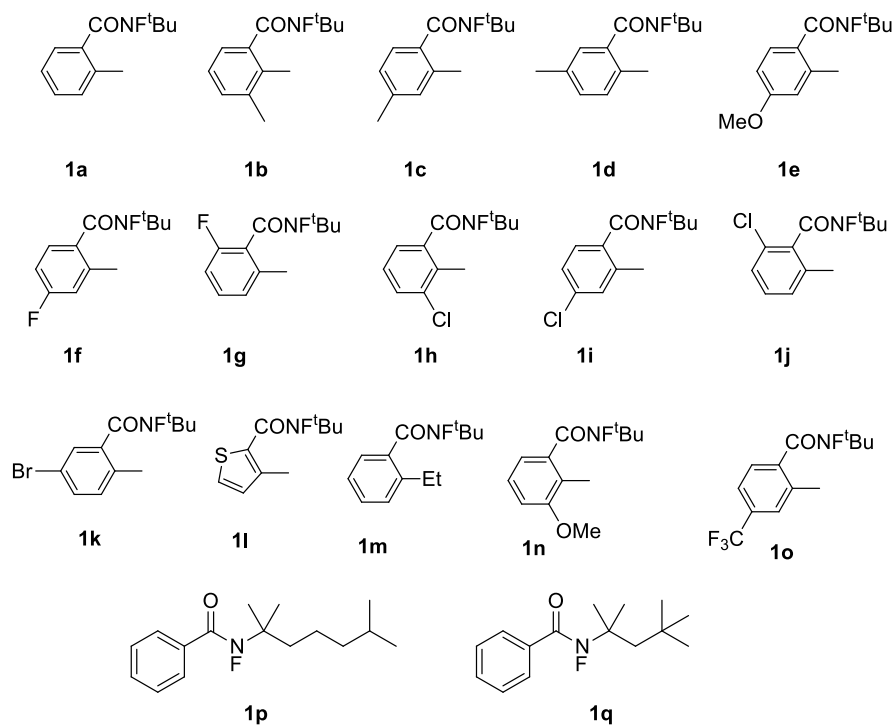

**Supplementary Table 11. List of amines.**

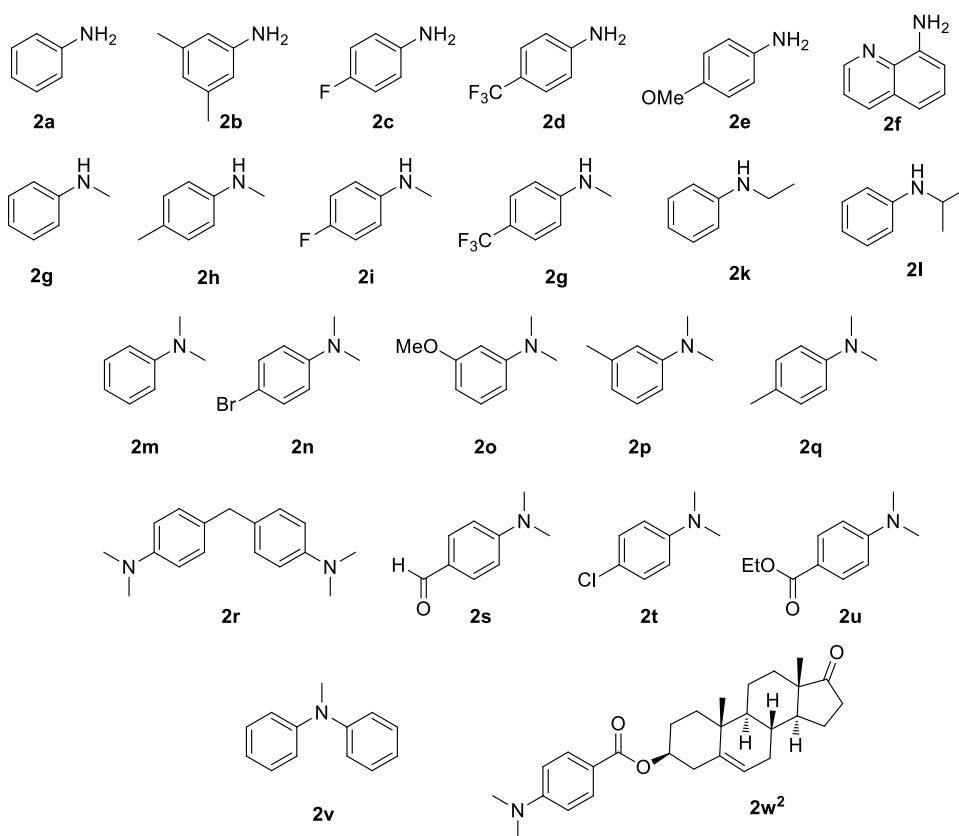

**Supplementary Table 12. List of Hantzsch esters or Hantzsch nitrile.<sup>3</sup>**

2° alkyl Hantzsch ester:

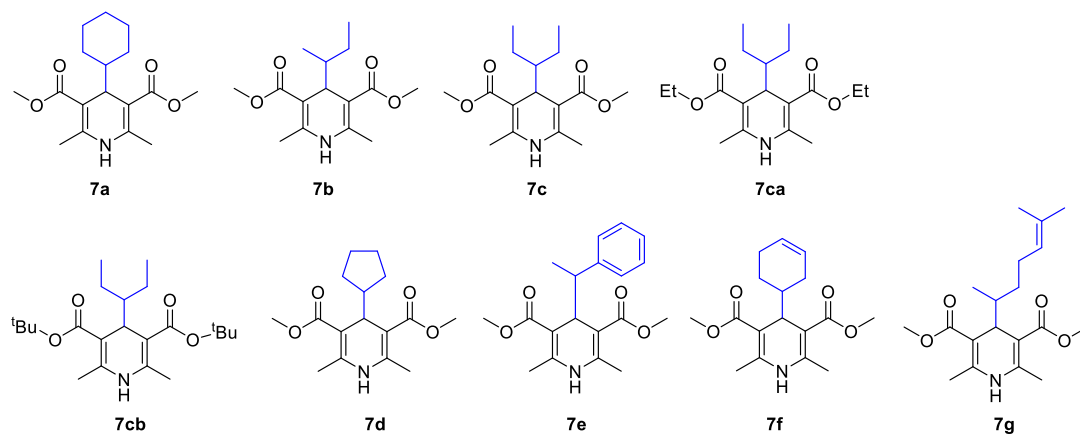

1° alkyl Hantzsch ester:

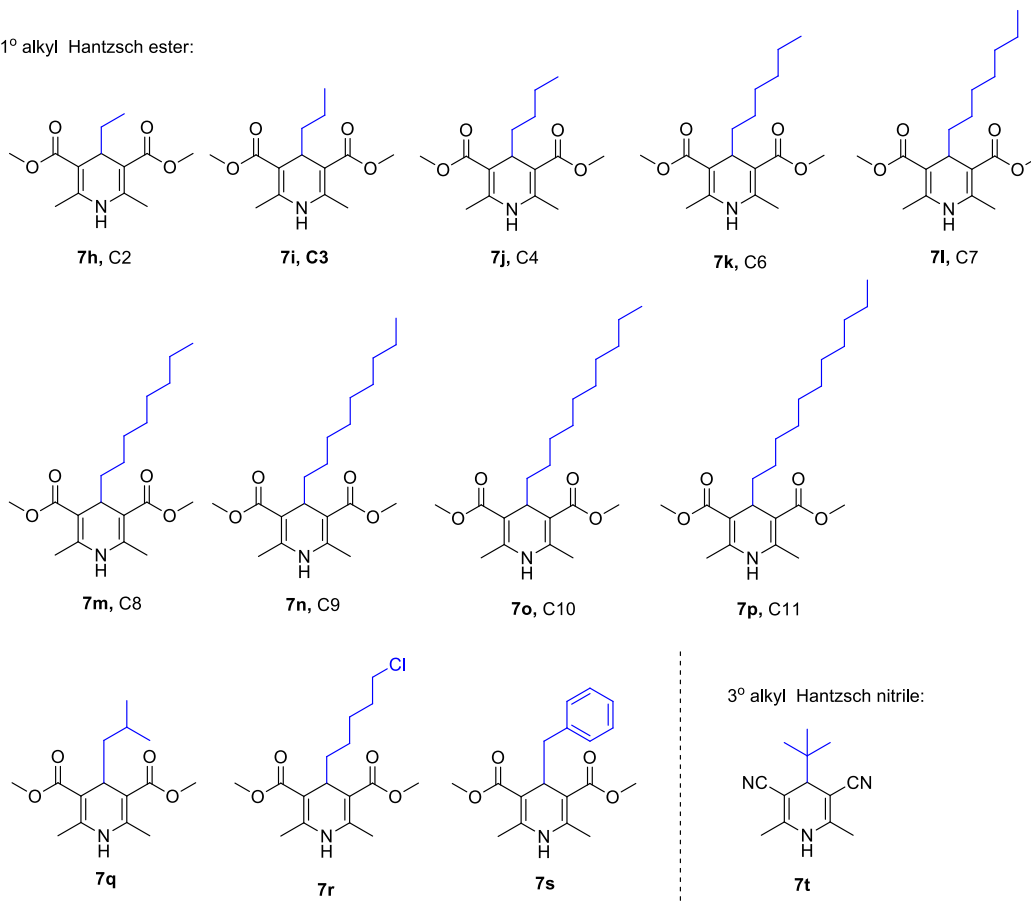

## General procedure.

### General procedure of “condition A”

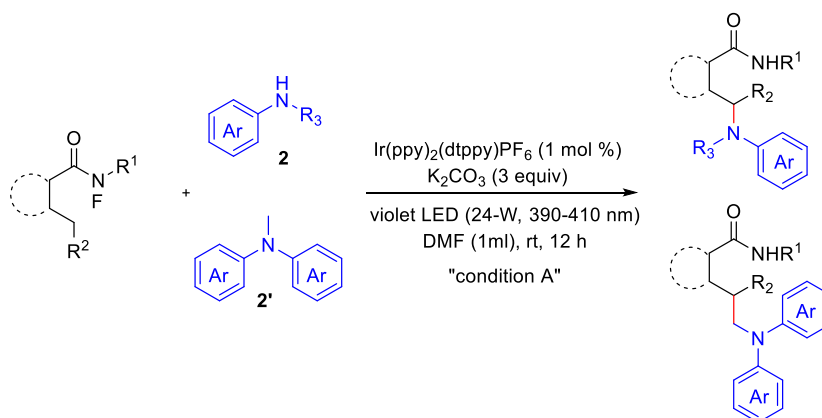

In a dry 10 ml glass test tube, substrate *N*-fluoroamides (0.2 mmol), aniline (0.6 mmol, 3 equiv),  $\text{Ir(ppy)}_2(\text{dtppy})\text{PF}_6$  (1 mol %), and  $\text{K}_2\text{CO}_3$  (0.6 mmol, 3 equiv) were dissolved in DMF (2.0 mL) under Ar atmosphere. The glass test tube was then transferred to a 24-W violet light photoreactor, where it was irradiated for 12 h. Then, the reaction mixture was quenched by  $\text{H}_2\text{O}$ , extracted by EtOAc, wash by saturation NaCl, dried over anhydrous sodium sulfate, concentrated in vacuo, and the residue was purified by column chromatography to afford the product.

## General procedure of “condition B”

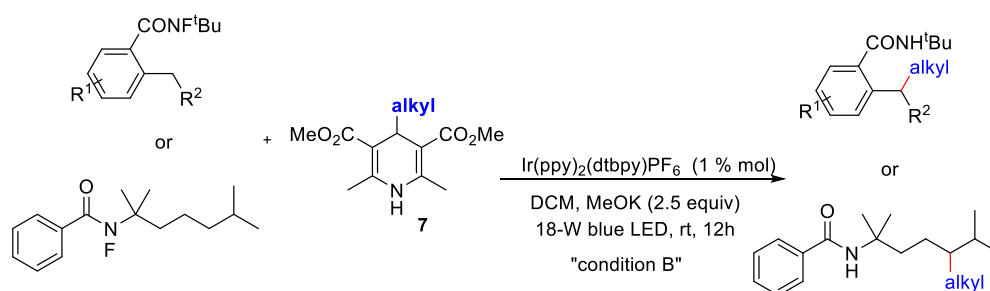

In a dry 10 ml glass test tube, substrate *N*-fluoroamides (0.2 mmol), Hantzsch esters or Hantzsch nitrile (0.6 mmol, 3 equiv), Ir(ppy)<sub>2</sub>(dtbpy)PF<sub>6</sub> (1 mol %), and MeOK (0.5 mmol, 2.5 equiv) were dissolved in DCM (2.0 mL) under Ar atmosphere. The glass test tube was then transferred to an 18-W blue LED photoreactor, where it was irradiated for 12 h. Then, the reaction mixture was quenched by H<sub>2</sub>O, extracted by DCM, wash by saturation NaCl, dried over anhydrous sodium sulfate, concentrated in vacuo, and the residue was purified by column chromatography to afford the product.

## Synthetic application:<sup>4-5</sup>

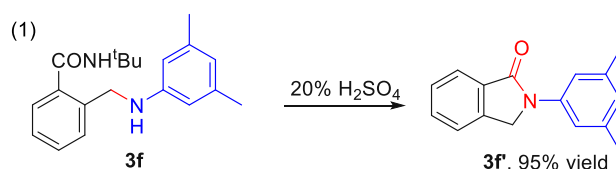

*N*-(tert-butyl)-2-((3,5-dimethylphenyl)amino)methylbenzamide (3f, 31.0 mg, 0.1 mmol) was dissolved in sulfuric acid (20 wt% in H<sub>2</sub>O). The reaction mixture was stirred for 12 h at 100 °C. Then, it was cooled down to the room temperature and extracted with ethyl ether. The organic layer was dried over anhydrous sodium sulfate, concentrated in vacuo, and the residue was purified by chromatography on silica gel (*n*-hexane/EtOAc) to give the 2-(3,5-dimethylphenyl)isoindolin-1-one (3f', 95%).

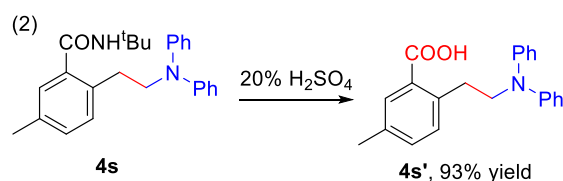

*N*-(tert-butyl)-2-(2-(diphenylamino)ethyl)-5-methylbenzamide (4s, 37.2 mg, 0.1 mmol) was dissolved in sulfuric acid (20 wt% in H<sub>2</sub>O). The reaction mixture was stirred for 12 h at 100 °C. Then, it was cooled down to the room temperature and extracted with ethyl ether. The organic layer was dried over anhydrous sodium sulfate, concentrated in vacuo, and the residue was purified by chromatography on silica gel (*n*-hexane/EtOAc) to give the 2-(2-(diphenylamino)ethyl)-5-methylbenzoic acid (4s', 93%).

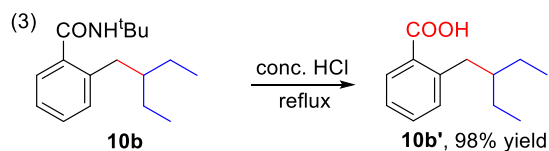

*N*-(*tert*-butyl)-2-(2-ethylbutyl)benzamide (**10b**, 26.1 mg, 0.1 mmol) was dissolved in conc. HCl (1 mL). The mixture was then reflux for 48 hours. Then, it was cooled down to the room temperature and extracted with ethyl ether. The organic layer was dried over anhydrous sodium sulfate, concentrated in vacuo, and the residue was purified by chromatography on silica gel (*n*-hexane/EtOAc) to give the 2-(2-ethylbutyl)benzoic acid (**10b'**, 20.2 mg, 98%).

## Supplementary Discussion

### The Mechanistic Study.

#### Trapping with TEMPO:

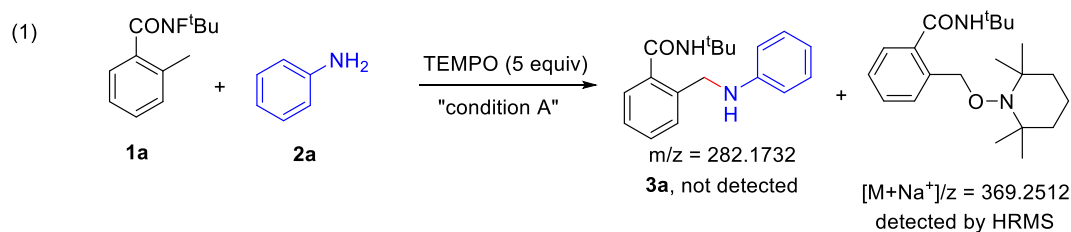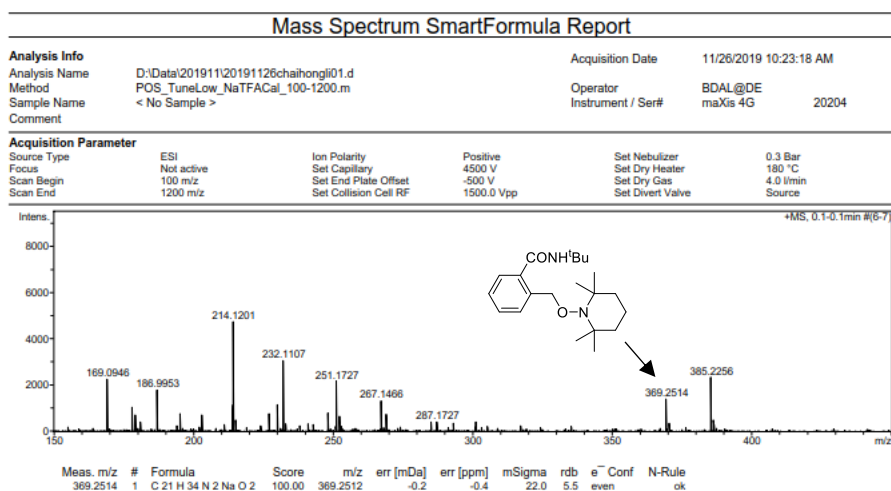

Supplementary Figure 1. Mass Spectrum of TEMPO addition.

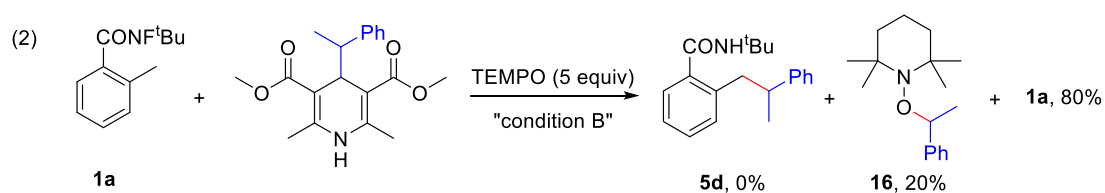

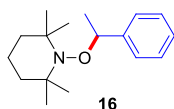

**2,2,6,6-tetramethyl-1-(1-phenylethoxy)piperidine (16)**

<sup>1</sup>HNMR (300 MHz, CDCl<sub>3</sub>) δ 7.21-7.42 (m, 5H), 4.77 (dd, *J* = 6.6 Hz, 13.3 Hz, 1H), 1.48 (d, *J* = 6 Hz, 6H), 1.37 (s, 3H), 1.29 (s, 3H), 1.16 (s, 3H), 1.02 (s, 3H), 0.65 (s, 3H).

<sup>13</sup>CNMR (75 MHz, CDCl<sub>3</sub>) δ 145.86, 128.00, 126.77, 126.61, 83.14, 59.67, 40.38, 23.58, 20.35, 17.25.

HRMS (ESI): C<sub>17</sub>H<sub>27</sub>NO+Na<sup>+</sup> Calcd: 284.1985, Found: 284.1986.

**Radical clock experiments:**

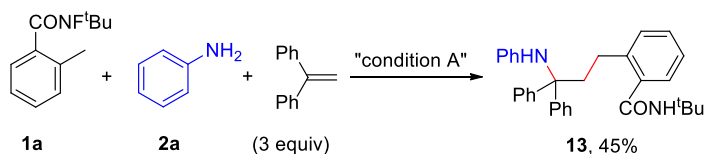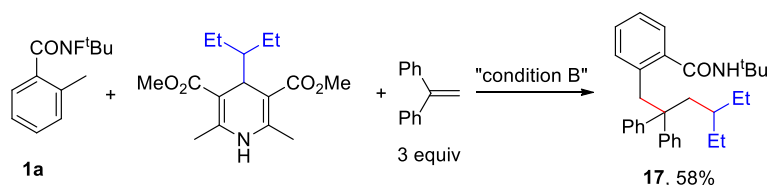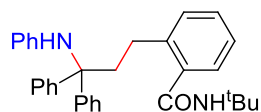

***N*-(tert-butyl)-2-(3,3-diphenyl-3-(phenylamino)propyl)benzamide (13)**, 40.4 mg, yield: 45%. Yellow oil.

<sup>1</sup>HNMR (300 MHz, CDCl<sub>3</sub>): δ 7.59 (d, *J* = 7.8 Hz, 4H), 7.10-7.36 (m, 9H), 6.95 (t, *J* = 7.5 Hz, 2H), 6.81 (d, *J* = 7.2 Hz, 1H), 6.55 (t, *J* = 7.2 Hz, 1H), 6.46 (d, *J* = 7.8 Hz, 2H), 5.69 (s, 1H), 5.62 (s, 1H), 2.72-2.78 (m, 2H), 2.48-2.55 (m, 2H), 1.49 (s, 9H).

<sup>13</sup>CNMR (75 MHz, CDCl<sub>3</sub>): δ 170.13, 146.66, 144.37, 140.68, 137.01, 130.36, 129.82, 128.35, 128.10, 127.85, 126.47, 125.89, 116.64, 115.64, 65.93, 51.91, 44.74, 28.96, 28.81 (d, *J* = 3.8 Hz)

HRMS (ESI) C<sub>32</sub>H<sub>34</sub>N<sub>2</sub>O+Na<sup>+</sup> Calcd: 485.2563, Found: 485.2573.

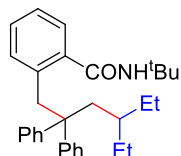

***N*-(tert-butyl)-2-(4-ethyl-2,2-diphenylhexyl)benzamide (17)**, 52.1 mg, yield: 58%. Yellow oil.

<sup>1</sup>HNMR (300 MHz, CDCl<sub>3</sub>) δ 7.15-7.25 (m, 11H), 7.06 (t, *J* = 7.5 Hz, 1H), 6.93 (t, *J* = 7.8 Hz, 1H), 6.37 (d, *J* = 7.8 Hz, 1H), 5.31 (s, 1H), 3.83 (s, 2H), 1.89 (d, *J* = 4.5 Hz, 2H), 1.45 (s, 9H), 1.20-1.30 (m, 1H), 0.83-0.93 (m, 4H), 0.56 (t, *J* = 7.2 Hz, 6H).

<sup>13</sup>CNMR (75 MHz, CDCl<sub>3</sub>) δ 17.24, 147.22, 139.72, 136.69, 131.18, 129.28, 128.34, 127.59, 126.49, 125.80, 125.65, 52.63, 51.63, 43.23, 42.23, 35.33, 28.72, 25.37, 10.23.

HRMS (ESI): C<sub>31</sub>H<sub>39</sub>NO+Na<sup>+</sup> Calcd: 464.2924, Found: 464.2940.

### Homo coupling results:

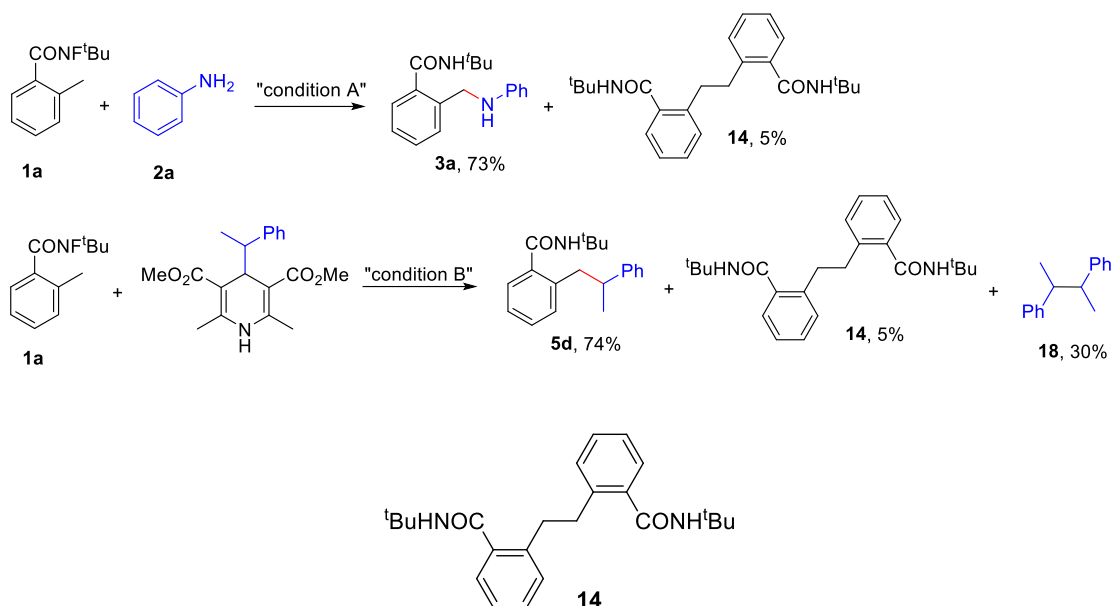

**2,2'-(ethane-1,2-diyl)bis(N-(tert-butyl)benzamide) (14)**, 3.8 mg, yield: 5%. Colorless oil.

$^1\text{H NMR}$  (300 MHz,  $\text{CDCl}_3$ )  $\delta$  7.25-7.31 (m, 5H), 7.18 (t,  $J = 7.5$  Hz, 3H), 5.64 (s, 2H), 3.09 (s, 4H), 1.45 (s, 18H).

$^{13}\text{C NMR}$  (75 MHz,  $\text{CDCl}_3$ )  $\delta$  169.85, 139.46, 137.84, 130.54, 129.44, 126.60, 125.92, 51.75, 35.16, 28.82.

**HRMS (ESI)**  $\text{C}_{24}\text{H}_{32}\text{N}_2\text{O}_2 + \text{Na}^+$  Calcd: 403.2361, Found: 403.2360.

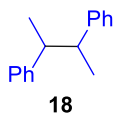

**butane-2,3-diyl dibenzene (18)**, dr = 1:1.3. Colorless oil.

$^1\text{H NMR}$  (300 MHz,  $\text{CDCl}_3$ )  $\delta$  6.93-7.34 (m, 10H), 2.93-2.95 (m, 1H), 2.79-2.80 (m, 1H), 1.28 (d,  $J = 6.6$  Hz, 3H), 1.02 (d,  $J = 6$  Hz, 3H).

$^{13}\text{C NMR}$  (75 MHz,  $\text{CDCl}_3$ )  $\delta$  146.51, 145.86, 128.31, 127.85, 127.80, 127.04, 126.08, 125.72, 47.29, 46.50, 29.75, 21.08, 17.97.

**HRMS (ESI)**  $\text{C}_{16}\text{H}_{18} + \text{Na}^+$  Calcd: 233.1301, Found: 233.1302.

### Isotope tracing:

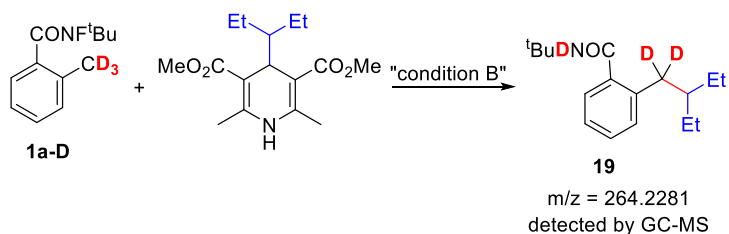



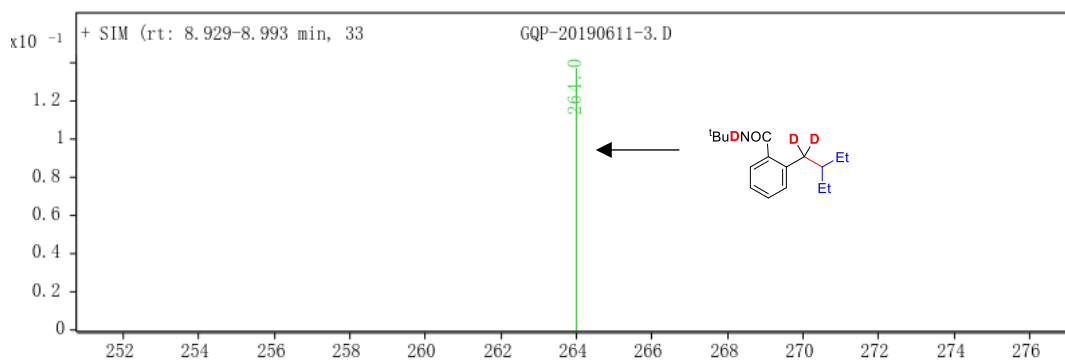

Supplementary Figure 2. GC-MS of isotope tracing.

**Reactions under oxidative conditions:**

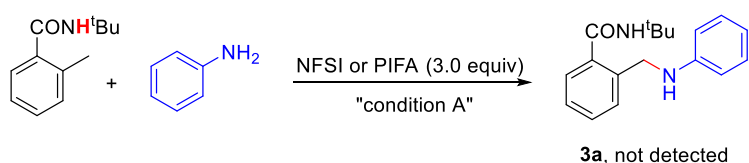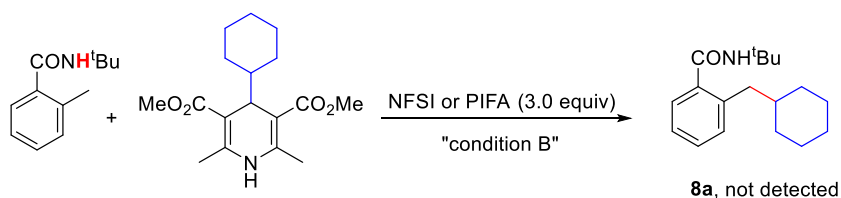

**The reactions with *N*-chloro-amide substrate.**

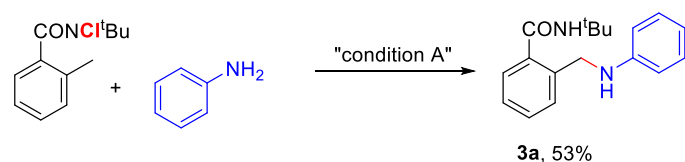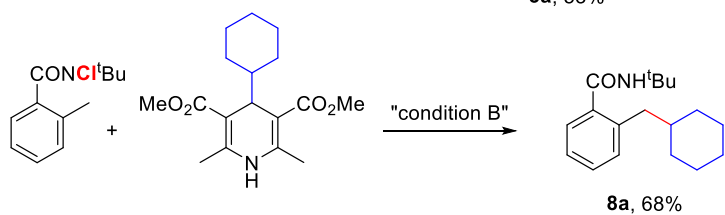

**Other radical precursors:**

Other radical precursors, such as  $\text{PhSO}_2\text{Na}$  and  $\text{BnBF}_3\text{K}$  were used instead of *N,N*-dimethylaniline.

(a) When  $\text{PhSO}_2\text{Na}$  was used as radical precursor, the desired product was obtained in 45% yield.

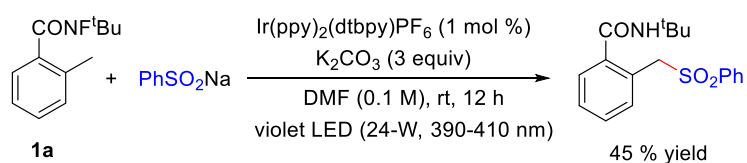

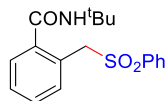

***N*-(tert-butyl)-2-((phenylsulfonyl)methyl)benzamide**, white solid, mp: 143-144°C.

**<sup>1</sup>H NMR** (300 MHz, CDCl<sub>3</sub>): δ 7.81 (d, *J* = 7.2 Hz, 2H), 7.68 (t, *J* = 7.5 Hz, 1H), 7.55 (t, *J* = 7.8 Hz, 2H), 7.46-7.49 (m, 1H), 7.27-7.41 (m, 2H), 7.11 (d, *J* = 7.2 Hz, 1H), 6.37 (br, 1H), 4.68 (s, 2H), 1.50 (s, 9H).

**<sup>13</sup>C NMR** (75 MHz, CDCl<sub>3</sub>): δ 168.62, 139.88, 138.78, 133.96, 132.53, 129.57, 129.29, 129.07, 128.38, 128.06, 124.63, 58.98, 52.08, 28.70.

**HRMS (ESI)**: C<sub>18</sub>H<sub>21</sub>NO<sub>3</sub>S+Na<sup>+</sup> Calcd: 354.1134, Found: 354.1134.

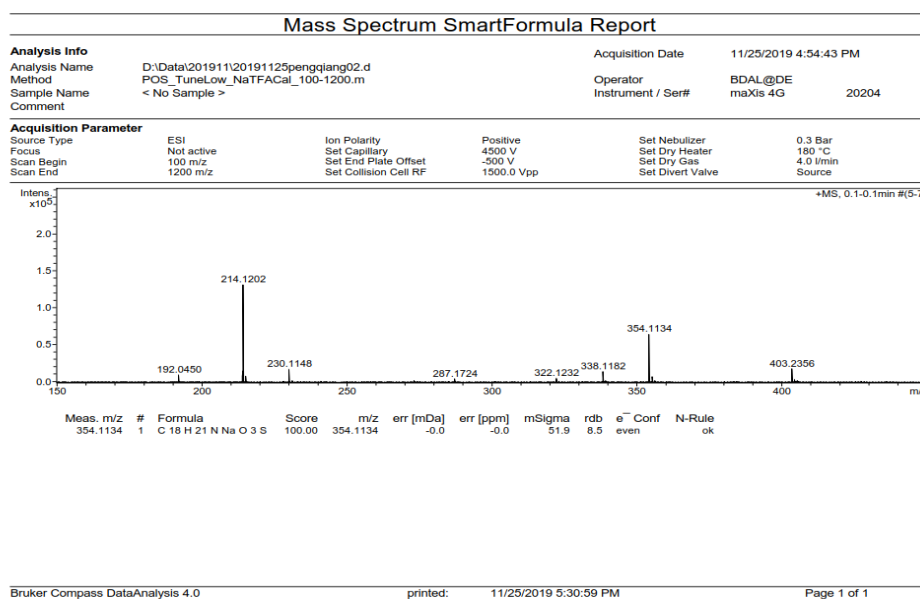

**Supplementary Figure 3.** Mass Spectrum of the PhSO<sub>2</sub>Na reaction.

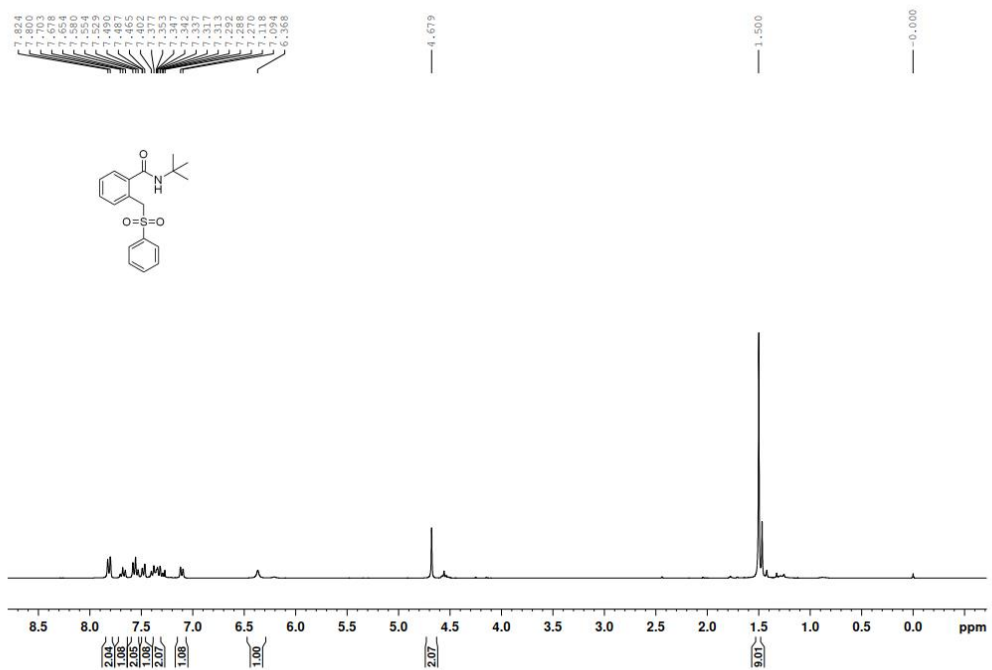

**Supplementary Figure 4.** <sup>1</sup>H NMR (300 MHz, CDCl<sub>3</sub>) spectra for compound *N*-(*tert*-butyl)-2-((phenylsulfonyl)methyl)benzamide.

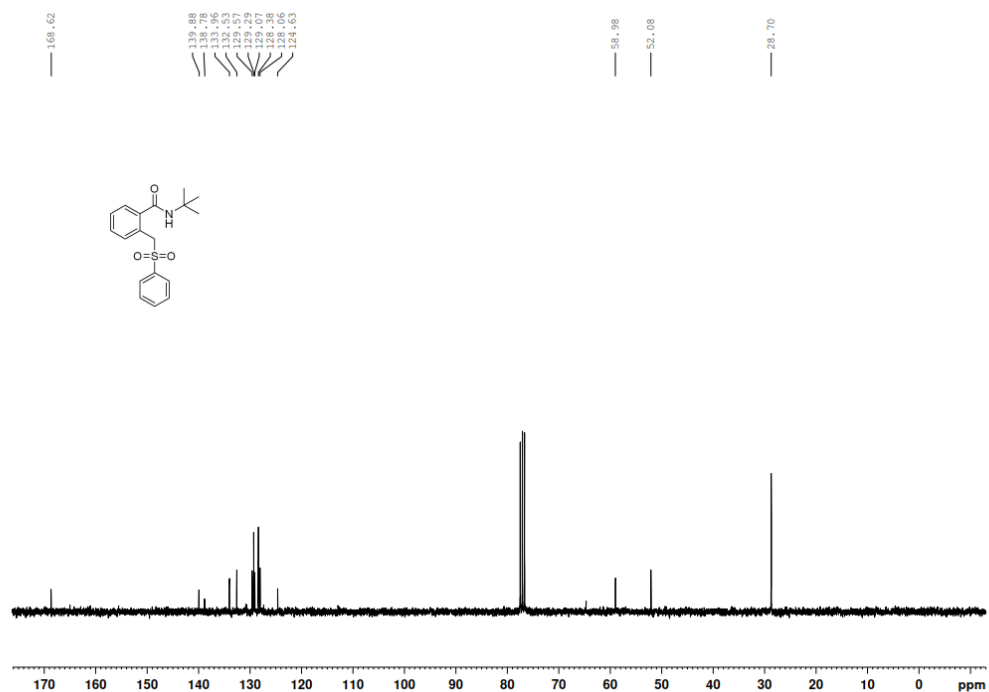

**Supplementary Figure 5.** <sup>13</sup>C NMR (75 MHz, CDCl<sub>3</sub>) spectra for compound *N*-(*tert*-butyl)-2-((phenylsulfonyl)methyl)benzamide.

(b) When BnBF<sub>3</sub>K was used as radical precursor, the desired product was obtained in 38% yield.

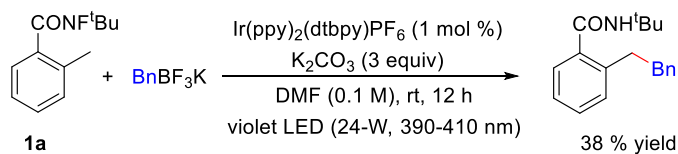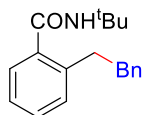

**N-(tert-butyl)-2-phenethylbenzamide.** Pale yellow solid, mp: 97-100°C.

<sup>1</sup>HNMR (300 MHz, CDCl<sub>3</sub>) δ 7.16-7.32 (m, 9H), 5.48(s, 1H), 3.07 (t, *J* = 7.2 Hz, 2H), 2.92 (t, *J* = 8.7 Hz, 2H), 1.45 (s, 9H).

<sup>13</sup>CNMR (75 MHz, CDCl<sub>3</sub>) δ 169.72, 141.81, 139.44, 137.95, 130.21, 129.45, 128.55, 128.31, 126.58, 125.96, 125.88, 51.70, 38.08, 35.47, 28.78.

HRMS (ESI): C<sub>19</sub>H<sub>23</sub>NO+Na<sup>+</sup> Calcd: 304.1672, Found: 304.1672.

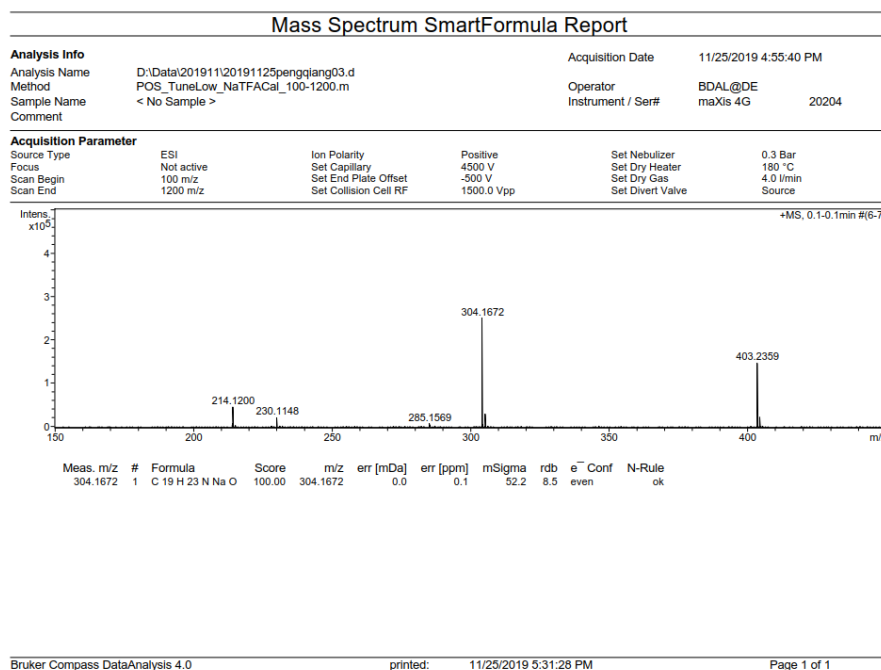

**Supplementary Figure 6.** Mass Spectrum of the BnBF<sub>3</sub>K reaction.

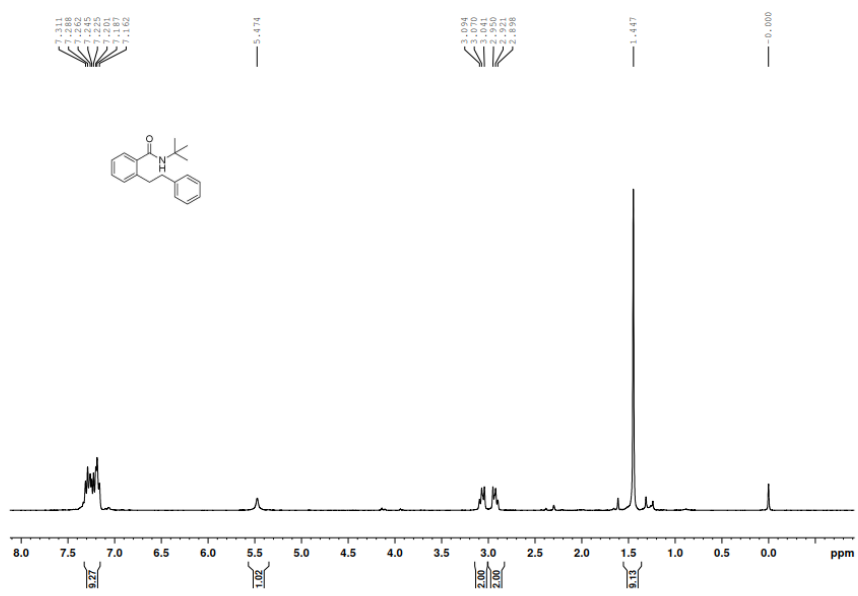

Supplementary Figure 7. <sup>1</sup>H NMR (300 MHz, CDCl<sub>3</sub>) spectra for compound *N*-(*tert*-butyl)-2-phenethylbenzamide.

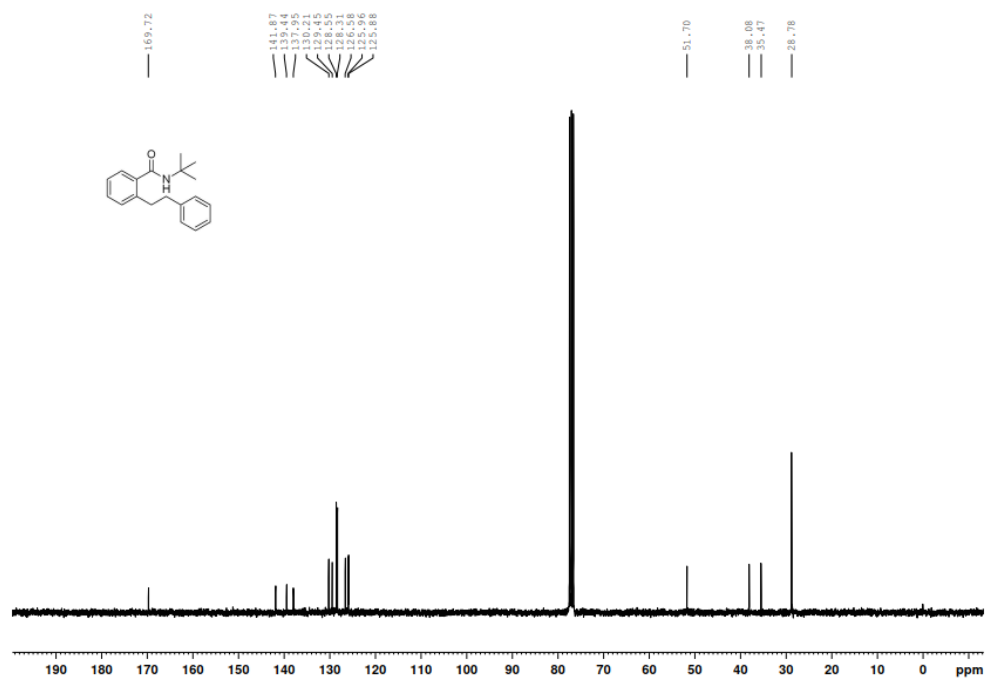

Supplementary Figure 8. <sup>13</sup>C NMR (75 MHz, CDCl<sub>3</sub>) spectra for compound *N*-(*tert*-butyl)-2-phenethylbenzamide.

### Cyclic Voltammetry Experiments:

Cyclic Voltammetry was performed on a CH Instruments Electrochemical Workstation model CHI760E. A solution of the sample in MeCN (0.001 M) was tested with 0.1 M Bu<sub>4</sub>NPF<sub>6</sub> as the supporting electrolyte, using a glassy carbon as the working electrode, a Pt as the counter electrode, and a saturated calomel electrode reference electrode. Scan rate = 0.05 V/s, 2 sweep segments, a sample interval of 0.001 V.

### Reductive potential of substrate *N*-fluorocarboxamides **1a** and **1o**.

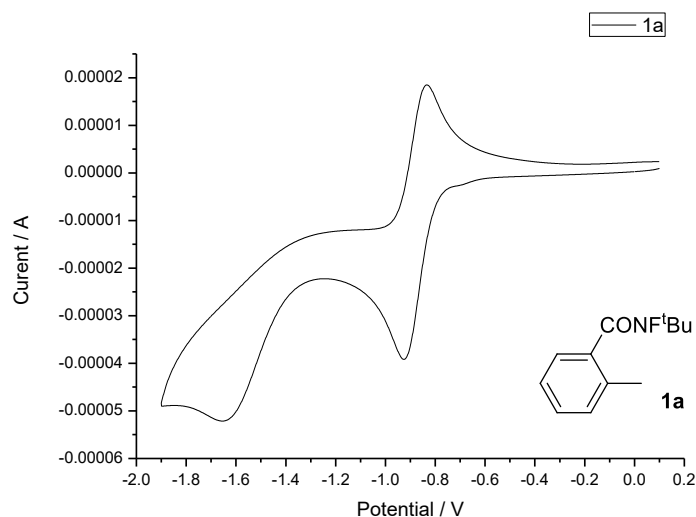

Supplementary Figure 9. Cyclic Voltammogram of **1a**,  $E_p^{0/-1}(\mathbf{1a}) = -0.84$  V (vs SCE).

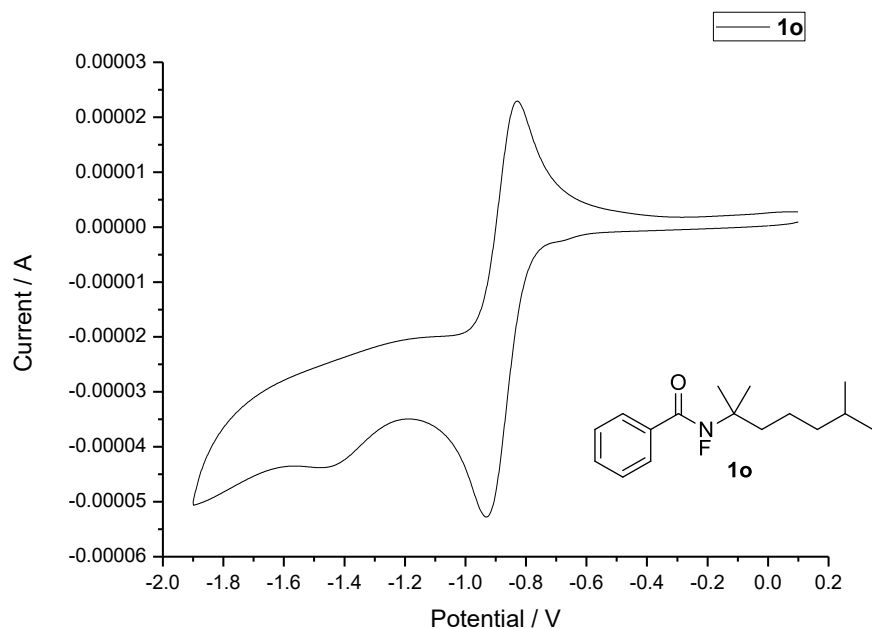

Supplementary Figure 10. Cyclic Voltammogram of **1o**,  $E_p^{0/-1}(\mathbf{1o}) = -0.83$  V (vs SCE).

Reductive potential of substrate Hantzsch ester PhNH<sub>2</sub> (2a).

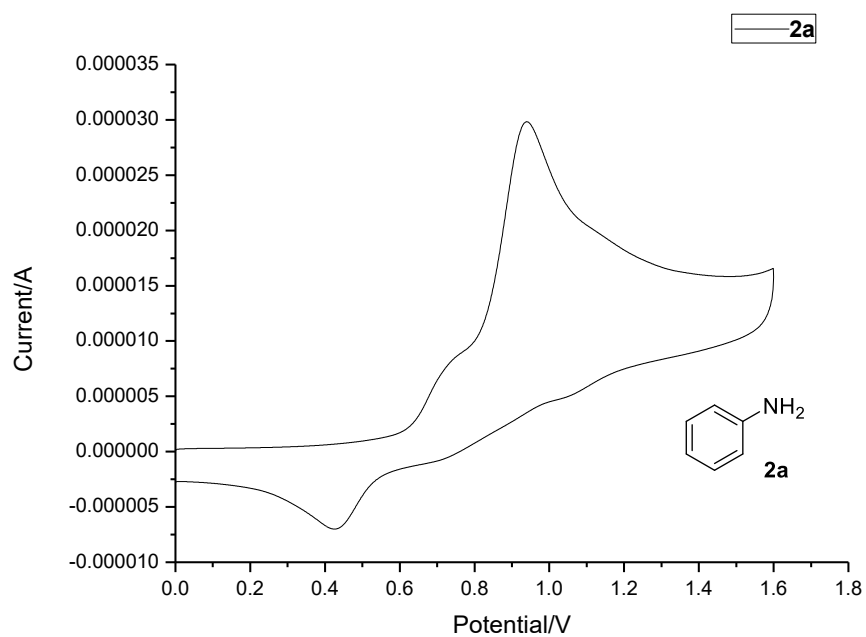

Supplementary Figure 11. Cyclic Voltammogram of PhNH<sub>2</sub> (2a),  $E_p^{0/+1}(2a) = 0.94$  V (vs SCE).

Reductive potential of substrate Hantzsch ester 7c, 7ca, 7cb.

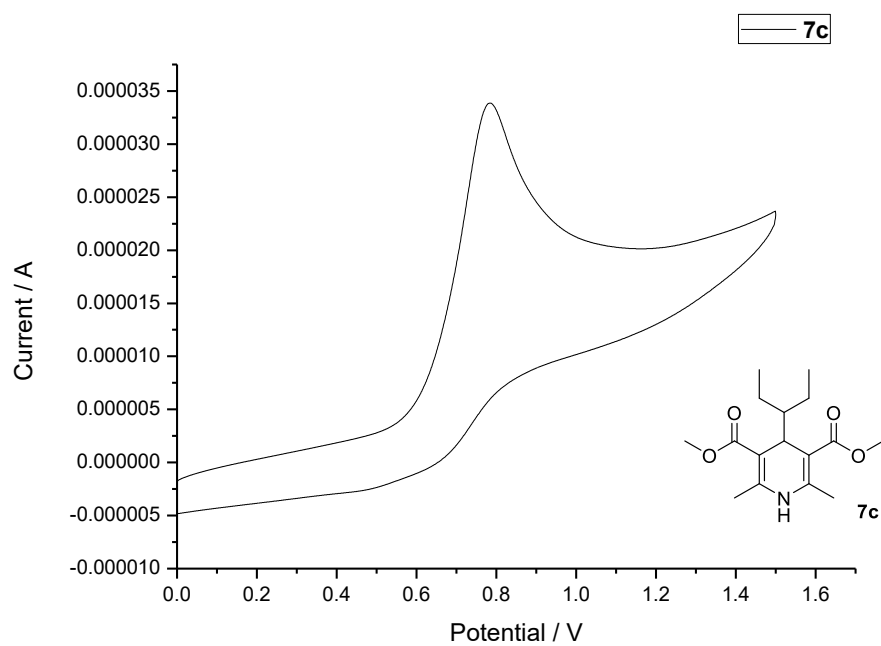

Supplementary Figure 12. Cyclic Voltammogram of 7c,  $E_p^{0/+1}(7c) = 0.78$  V (vs SCE)

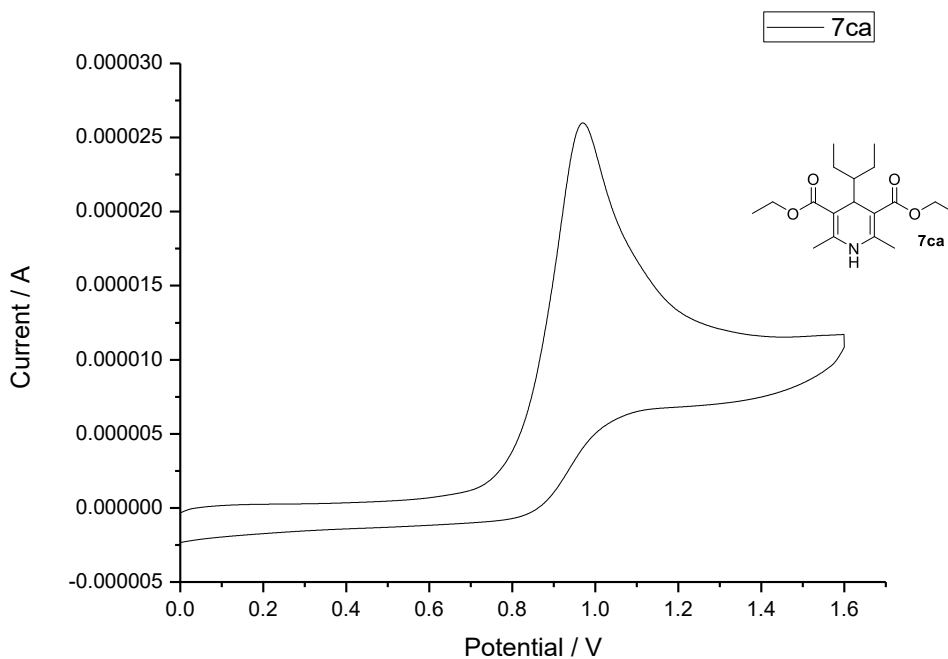

**Supplementary Figure 13.** Cyclic Voltammogram of **7ca**,  $E_p^{0/+1}(\mathbf{7ca}) = 0.97$  V (vs SCE).

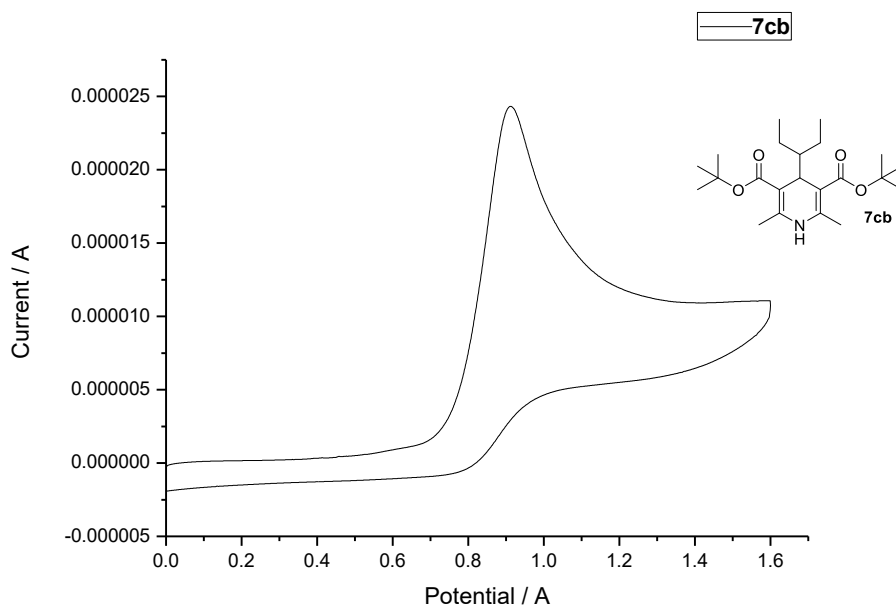

**Supplementary Figure 14.** Cyclic Voltammogram of **7cb**,  $E_p^{0/+1}(\mathbf{7cb}) = 0.91$  V (vs SCE).

#### Stern-Volmer fluorescence quenching study.

DMF was degassed with a stream of argon for 30 min.  $\text{Ir}(\text{ppy})_2(\text{dtbpy})\text{PF}_6$  (4.6 mg, 5.0  $\mu\text{mol}$ ) was dissolved in 1.0 mL DMF to prepare a  $5 \times 10^{-3}$  M solution. 100  $\mu\text{L}$  of this solution was added to each of a set of 6 volumetric flasks (10 mL). Subsequently, the solution of quencher **1a** or **2a** in DMF (1.0 mL, 0.025 M) was added in increasing amounts (0, 100  $\mu\text{L}$ , 200  $\mu\text{L}$ , 300  $\mu\text{L}$ , 400  $\mu\text{L}$ , 500  $\mu\text{L}$ ) to the volumetric



flasks and the volume of volumetric flasks were adjusted to 10 mL by adding DMF. Emission intensities were recorded by using a HITACHI spectrofluorophotometer F-7000. All solutions were excited at 375 nm and the fluorescence emission spectra were recorded.

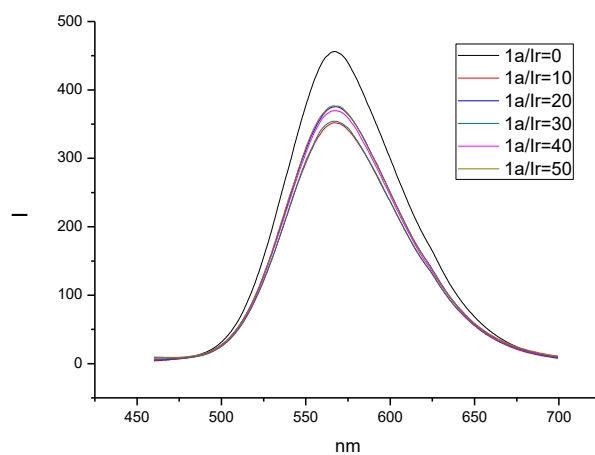

**Supplementary Figure 15.** The emission quenching spectrum of Ir(ppy)<sub>2</sub>(dtbp)PF<sub>6</sub> by various concentrations of quencher **1a**.

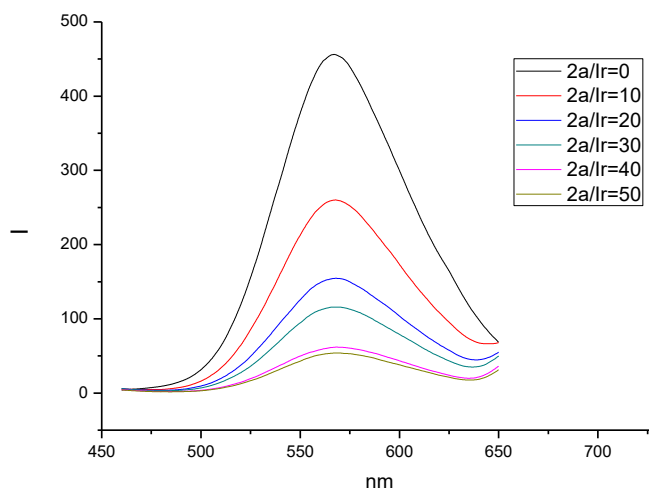

**Supplementary Figure 16.** The emission quenching spectrum of Ir(ppy)<sub>2</sub>(dtbp)PF<sub>6</sub> by various concentrations of quencher **2a**.

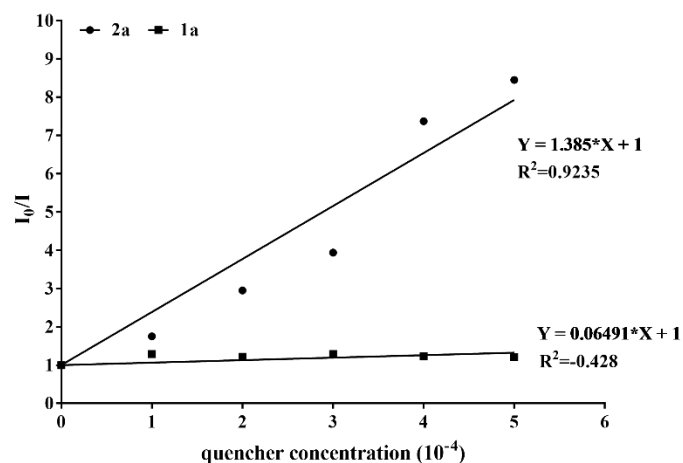

**Supplementary Figure 17.** Stern-Volmer plot for the emission quenching of Ir(ppy)<sub>2</sub>(dtbbpy)PF<sub>6</sub> by various concentrations of quencher **1a** or **2a**.

### EPR experiments

EPR spectra were recorded at room temperature without using any free radical spin trapping agent. According to general procedure,<sup>4</sup> the HFIP solutions of PC (Ir(ppy)<sub>2</sub>(dtbbpy)PF<sub>6</sub>), aniline (**2a**), or PC (Ir(ppy)<sub>2</sub>(dtbbpy)PF<sub>6</sub>) with aniline **2a** were respectively stirred under violet LED (24-W, 390-410 nm) irradiation for 1h, and then measured by EPR. As shown in Figure S10, EPR signals were observed only in Fig. c, where PC (Ir(ppy)<sub>2</sub>(dtbbpy)PF<sub>6</sub>) and aniline (**2a**) were added together in the HFIP solution. The result indicated that radical species were generated therein.

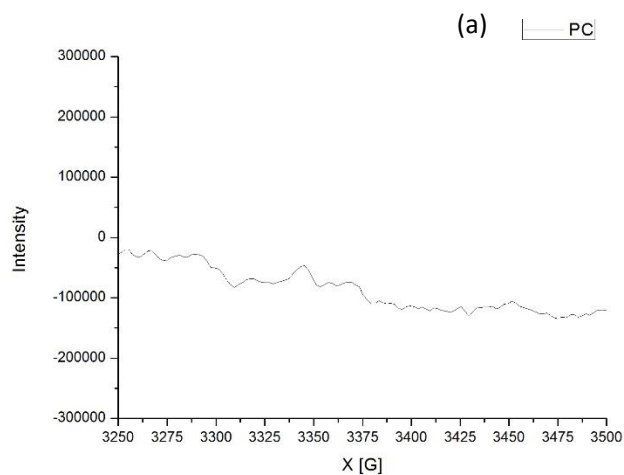

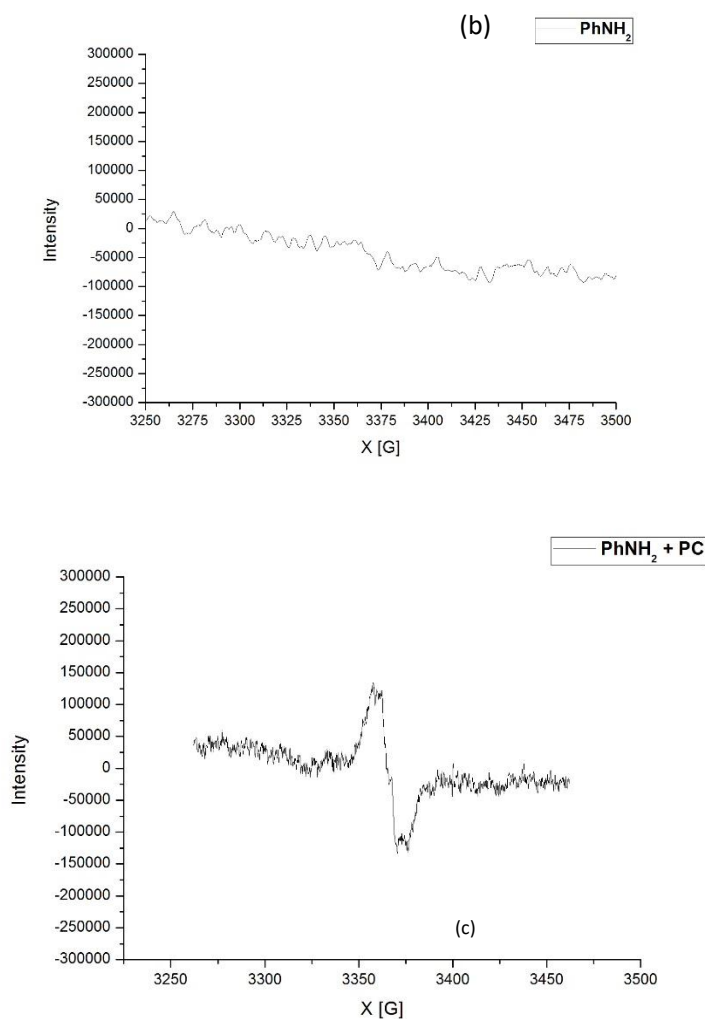

**Supplementary Figure 18.** EPR experiments. (a): PC ( $\text{Ir}(\text{ppy})_2(\text{dtbpy})\text{PF}_6$ , 0.005 mol, 5 mol %); (b):  $\text{PhNH}_2$  (**2a**, 0.1 mol), and (c): [ $\text{PhNH}_2$  (**2a**, 0.1 mmol) + PC ( $\text{Ir}(\text{ppy})_2(\text{dtbpy})\text{PF}_6$ , 5 mol %)] in HFIP (1 ml), respectively. Stirred at room temperature under violet LED (24-W, 390-410 nm) irradiation for 1h, and the mixture were directly used for EPR experiments.

### Proposed mechanism.

#### “condition A”

Based on our investigations and previous reports,<sup>6</sup> a plausible mechanism was proposed in Supplementary Figure 19. The reaction starts with the oxidation of **2** by the excited-state  $\text{Ir}(\text{III})^*$  in the presence of base, yielding amine radical **A** and  $\text{Ir}(\text{II})$ . Then, the  $\text{Ir}(\text{II})$  ( $E_{1/2}^{\text{III/II}} = -1.51$  V vs SCE)<sup>7-9</sup> species facilitated the second SET process of substrate **1** ( $E_{\text{p}}^{0/-1}(\mathbf{1a}) = -0.84$  V versus SCE in MeCN)<sup>7-9</sup> to generate the amidyl radical **B**. The subsequently 1,5-HAT formed the radical intermediate **C** along with the oxidation of  $\text{Ir}(\text{II})$  to  $\text{Ir}(\text{III})$  to close the catalytic cycle. Finally, the radical-radical cross-coupling between N-center radical **A** and C-center radical intermediate **C** was proposed to provide the  $\text{sp}^3$  C-N cross coupling product **3**.

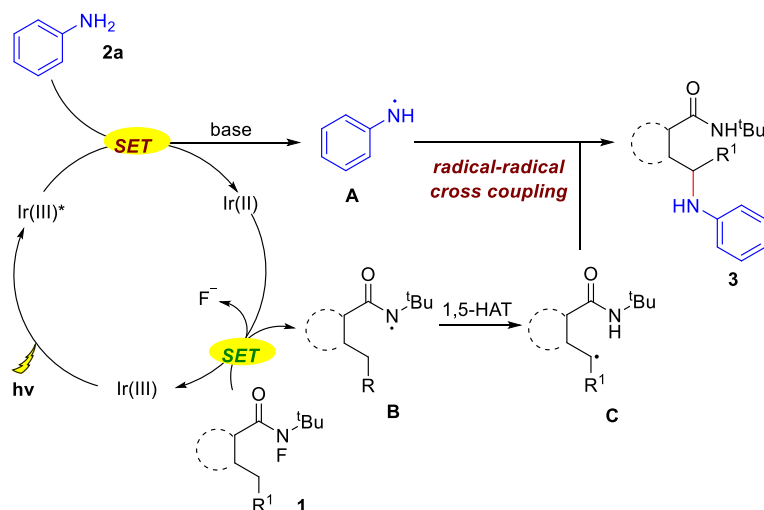

**Supplementary Figure 19.** Proposed mechanism of amine.

**“condition B”**

Based on our investigations and previous reports,<sup>6</sup> a plausible mechanism was proposed in Supplementary Figure 20. The reaction starts with the oxidation of **7** by the excited-state Ir(III)\* in the presence of base, yielding alkyl radical **A** and Ir(II). Then, the Ir(II) ( $E_{1/2}^{\text{III/II}} = -1.51$  V vs SCE)<sup>7-9</sup> species facilitated the second SET process of substrate **1** ( $E_{\text{p}}^{0/-1}(\mathbf{1a}) = -0.84$  V versus SCE in MeCN)<sup>7-9</sup> to generate the amidyl radical **B**. The subsequently 1,5-HAT formed the radical intermediate **C** along with the oxidation of Ir(II) to Ir(III) to close the catalytic cycle. Finally, the radical-radical cross-coupling between alkyl radical **A** and C-center radical intermediate **C** was proposed to provide the  $\text{sp}^3$  C-C cross coupling product **3**.

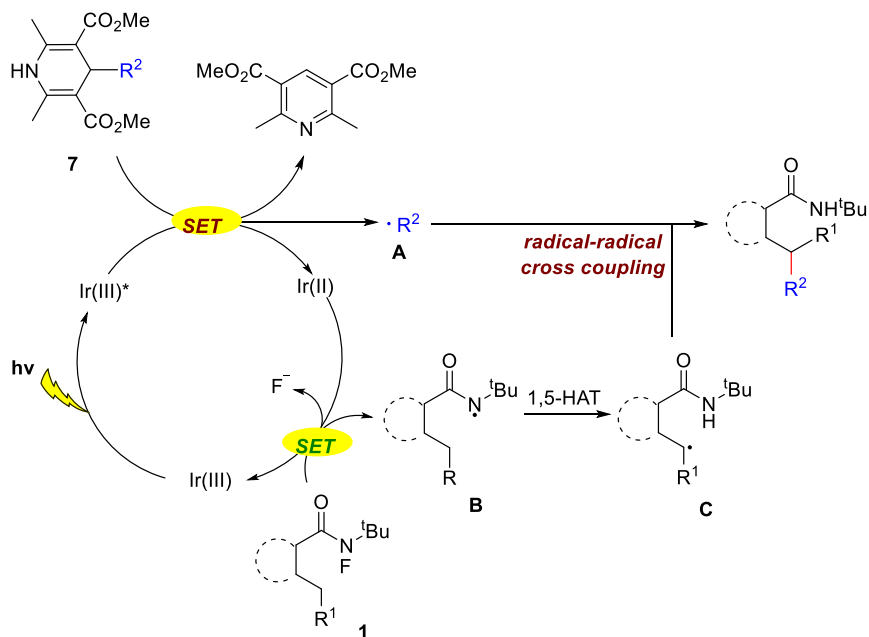

**Supplementary Figure 20.** Proposed mechanism of Hantzsch esters.

**The wavelength of the violet LED (24-W, 390-410 nm).**

The wavelength of the violet LED light we used (recorded on an AVANTES® AvaSpec-ULS2048 spectrometer instrument):

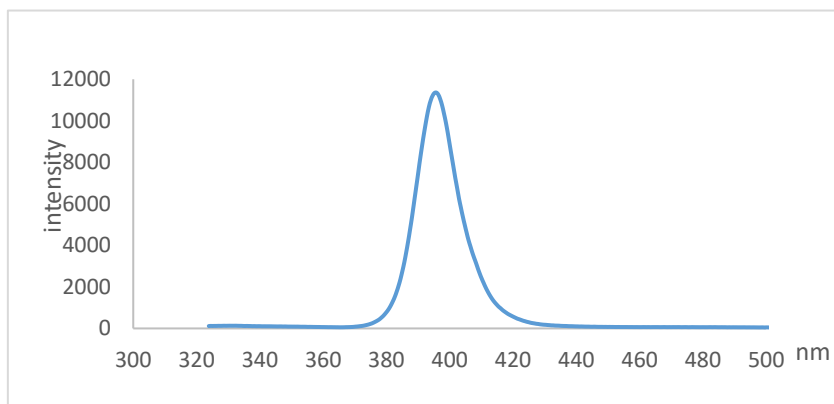

**Supplementary Figure 21.** The wavelength of the violet LED.

## Characterization of products.

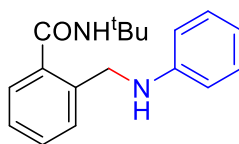

**3a**

*N*-(*tert*-butyl)-2-((phenylamino)methyl)benzamide (**3a**), 41.2 mg, yield: 73%. Yellow oil.

<sup>1</sup>HNMR (300 MHz, CDCl<sub>3</sub>): δ 7.61-7.64 (m, 1H), 7.37 (s, 3H), 7.21 (t, *J* = 8.1 Hz, 2H), 7.05 (s, 1H), 6.79 (t, *J* = 7.2 Hz, 1H), 6.71 (d, *J* = 7.8 Hz, 2H), 4.34 (s, 2H), 4.13 (br, 1H), 1.34 (s, 9H).

<sup>13</sup>CNMR (75 MHz, CDCl<sub>3</sub>): δ 168.44, 147.38, 137.90, 135.73, 130.14, 129.33, 128.82, 128.04, 118.80, 114.56, 113.70, 51.49, 47.32, 28.67.

HRMS (ESI): C<sub>18</sub>H<sub>22</sub>N<sub>2</sub>O+Na<sup>+</sup> Calcd: 305.1624, Found: 305.1615.

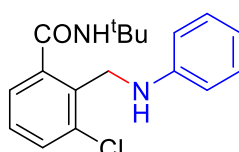

**3b**

*N*-(*tert*-butyl)-3-chloro-2-((phenylamino)methyl)benzamide (**3b**), 43.7 mg, yield: 69%. White solid, mp: 172-173°C.

<sup>1</sup>HNMR (300 MHz, CDCl<sub>3</sub>): δ 7.53 (d, *J* = 7.5 Hz, 1H), 7.46 (d, *J* = 7.8 Hz, 1H), 7.22-7.34 (m, 3H), 7.02 (s, 1H), 6.84 (t, *J* = 7.2 Hz, 1H), 6.77 (d, *J* = 7.8 Hz, 2H), 4.46 (s, 2H), 4.05 (br, 1H), 1.30 (s, 9H).

<sup>13</sup>CNMR (75 MHz, CDCl<sub>3</sub>): δ 167.51, 147.27, 140.89, 135.24, 132.73, 131.06, 129.36, 129.24, 127.61, 119.31, 114.05, 51.70, 43.90, 28.48.

HRMS (ESI): C<sub>18</sub>H<sub>21</sub>ClN<sub>2</sub>O+Na<sup>+</sup> Calcd: 339.1235, Found: 339.1227.

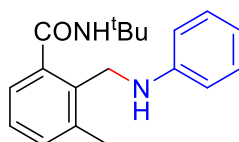

**3c**

*N*-(*tert*-butyl)-3-methyl-2-((phenylamino)methyl)benzamide (**3c**), 38.5 mg, yield: 65%. Yellow oil.

<sup>1</sup>HNMR (300 MHz, CDCl<sub>3</sub>): δ 7.44 (t, *J* = 4.2 Hz, 1H), 7.21-7.27 (m, 3H), 6.78-6.84 (m, 2H), 6.74 (d, *J* = 8.1 Hz, 2H), 4.26 (s, 2H), 3.90 (br, 1H), 2.42 (s, 3H), 1.30 (s, 9H).

<sup>13</sup>CNMR (75 MHz, CDCl<sub>3</sub>): δ 168.98, 147.69, 139.61, 137.58, 133.00, 132.00, 129.36, 128.02, 126.43, 118.79, 113.64, 51.52, 43.53, 28.59, 19.39.

HRMS (ESI): C<sub>19</sub>H<sub>24</sub>N<sub>2</sub>O+Na<sup>+</sup> Calcd: 319.1781, Found: 319.1773.

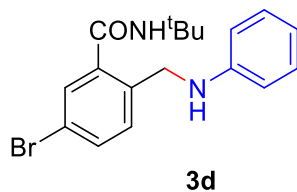

**5-bromo-*N*-(tert-butyl)-2-((phenylamino)methyl)benzamide (3d)**, 48.4 mg, yield: 67%. White solid, mp: 114-117°C.

<sup>1</sup>HNMR (300 MHz, CDCl<sub>3</sub>): δ 7.72 (s, 1H), 7.49 (d, *J* = 8.1 Hz, 1H), 7.17-7.23 (m, 3H), 6.87 (s, 1H), 6.79 (t, *J* = 7.2 Hz, 1H), 6.67 (d, *J* = 7.8 Hz, 2H), 4.31 (s, 2H), 4.09 (br, 1H), 1.34 (s, 9H).

<sup>13</sup>CNMR (75 MHz, CDCl<sub>3</sub>): δ 166.92, 147.10, 139.50, 134.93, 133.02, 131.65, 129.37, 121.82, 118.97, 113.67, 51.77, 46.70, 28.61.

**HRMS (ESI):** C<sub>18</sub>H<sub>21</sub>BrN<sub>2</sub>O+Na<sup>+</sup> Calcd: 383.0729, Found: 383.0715.

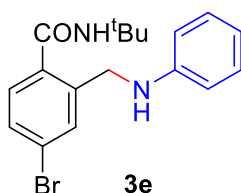

**4-bromo-*N*-(tert-butyl)-2-((phenylamino)methyl)benzamide (3e)**, 54.2 mg, yield: 75%. Yellow oil.

<sup>1</sup>HNMR (300 MHz, CDCl<sub>3</sub>): δ 7.53 (s, 1H), 7.49 (s, 2H), 7.19-7.26 (m, 2H), 7.00 (s, 1H), 6.81 (t, *J* = 7.5 Hz, 1H), 6.70 (d, *J* = 7.5 Hz, 2H), 4.31 (s, 2H), 4.11 (br, 1H), 1.33 (s, 9H).

<sup>13</sup>CNMR (75 MHz, CDCl<sub>3</sub>): δ 167.51, 147.03, 138.05, 136.61, 132.85, 131.08, 130.47, 129.40, 124.22, 119.10, 113.69, 51.67, 46.92, 28.63.

**HRMS (ESI):** C<sub>18</sub>H<sub>21</sub>BrN<sub>2</sub>O+Na<sup>+</sup> Calcd: 383.0729, Found: 383.0712.

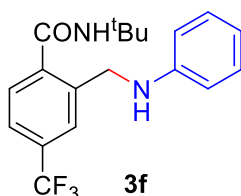

***N*-(tert-butyl)-2-((phenylamino)methyl)-4-(trifluoromethyl)benzamide (3f)**, 35.7 mg, yield: 51%. Yellow solid, mp: 153-155°C.

<sup>1</sup>HNMR (300 MHz, CDCl<sub>3</sub>): δ 7.88 (d, *J* = 7.8 Hz, 1H), 7.77 (d, *J* = 7.5 Hz, 1H), 7.62 (br, 1H), 7.51 (t, *J* = 7.8 Hz, 1H), 7.24-7.30 (m, 2H), 6.89 (t, *J* = 7.5 Hz, 1H), 6.78 (d, *J* = 7.8 Hz, 2H), 4.39 (s, 2H), 3.97 (br, 1H), 1.24 (s, 9H).

<sup>19</sup>FNMR (282 MHz) δ -58.34.

<sup>13</sup>CNMR (75 MHz, CDCl<sub>3</sub>): δ 167.14, 146.81, 141.77, 133.44, 132.59, 129.43, 128.50, 127.50 (q, *J* = 6.0 Hz), 126.03 (t, *J* = 273.0 Hz), 119.98, 114.30, 51.63, 43.07, 28.35.

**HRMS (ESI):** C<sub>19</sub>H<sub>21</sub>F<sub>3</sub>N<sub>2</sub>O+Na<sup>+</sup> Calcd: 373.1498, Found: 373.1502.

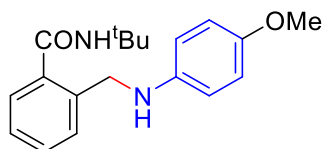

**3g**

*N*-(tert-butyl)-2-(((4-methoxyphenyl)amino)methyl)benzamide (**3g**), 24.9 mg, yield: 40%.

White oil liquid.

<sup>1</sup>HNMR (300 MHz, CDCl<sub>3</sub>): δ 7.61-7.65 (m, 1H), 7.54 (br, 1H), 7.24-7.33 (m, 3H), 6.75 (d, *J* = 9 Hz, 2H), 6.63 (d, *J* = 8.7 Hz, 2H), 4.18 (s, 2H), 3.70 (s, 3H), 1.24 (s, 9H).

<sup>13</sup>CNMR (75 MHz, CDCl<sub>3</sub>): δ 167.06, 152.15, 140.12, 137.10, 134.14, 129.28, 129.13, 128.32, 127.20, 114.15, 113.79, 54.64, 50.32, 47.41, 27.65.

HRMS (ESI): C<sub>19</sub>H<sub>24</sub>N<sub>2</sub>O<sub>2</sub>+Na<sup>+</sup> Calcd: 335.1703, Found: 335.1734.

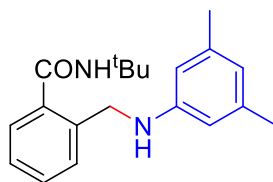

**3h**

*N*-(tert-butyl)-2-(((3,5-dimethylphenyl)amino)methyl)benzamide (**3h**), 39.7 mg, yield: 64%.

White solid, mp: 128-131°C.

<sup>1</sup>HNMR (300 MHz, CDCl<sub>3</sub>): δ 7.63-7.66 (m, 1H), 7.34-7.37 (m, 3H), 7.22 (s, 1H), 6.47 (s, 1H), 6.35 (s, 2H), 4.30 (s, 2H), 3.93 (br, 1H), 2.25 (s, 6H), 1.34 (s, 9H).

<sup>13</sup>CNMR (75 MHz, CDCl<sub>3</sub>): δ 168.33, 147.45, 138.97, 137.94, 135.68, 130.15, 128.96, 128.04, 120.91, 111.75, 51.44, 47.52, 28.68, 21.50.

HRMS (ESI): C<sub>20</sub>H<sub>26</sub>N<sub>2</sub>O+Na<sup>+</sup> Calcd: 333.1937, Found: 333.1926.

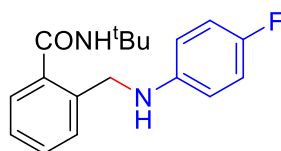

**3i**

*N*-(tert-butyl)-2-(((4-fluorophenyl)amino)methyl)benzamide (**3i**), 37.8 mg, yield: 63%. White solid, mp: 147-150°C.

<sup>1</sup>HNMR (300 MHz, CDCl<sub>3</sub>): δ 7.61-7.64 (m, 1H), 7.35-7.38 (m, 3H), 7.04 (s, 1H), 6.93 (t, *J* = 8.7 Hz, 2H), 6.63-6.68 (m, 2H), 4.29 (s, 2H), 4.06 (br, 1H), 1.34 (s, 9H).

<sup>19</sup>FNMR (282 MHz) δ -126.16.

<sup>13</sup>CNMR (75 MHz, CDCl<sub>3</sub>): δ 168.43, 143.66, 137.88, 135.51, 130.17, 128.82, 128.13, 115.96, 115.566, 114.68, 114.58, 51.51, 47.93, 28.69.

HRMS (ESI): C<sub>18</sub>H<sub>21</sub>FN<sub>2</sub>O+Na<sup>+</sup> Calcd: 323.1530, Found: 323.1519.



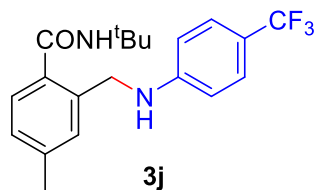

***N*-(tert-butyl)-4-methyl-2-(((4-(trifluoromethyl)phenyl)amino)methyl)benzamide (3j)**, 48.1 mg, yield: 66%. White solid, mp: 174-175°C.

**<sup>1</sup>HNMR** (300 MHz, CDCl<sub>3</sub>): δ 7.39 (d, *J* = 8.7 Hz, 3H), 7.19 (s, 1H), 7.12 (d, *J* = 7.8 Hz, 1H), 6.66 (d, *J* = 8.4 Hz, 2H), 6.15 (s, 1H), 4.76 (br, 1H), 4.41 (d, *J* = 5.7 Hz, 2H), 2.36 (s, 3H), 1.39 (s, 9H).

**<sup>19</sup>FNMR** (282 MHz) δ -61.04.

**<sup>13</sup>CNMR** (75 MHz, CDCl<sub>3</sub>): δ 169.16, 150.28, 140.45, 136.44, 134.42, 130.68, 128.42, 127.96, 126.63, 126.58, 112.35, 51.68, 46.45, 28.75, 21.29.

**HRMS (ESI):** C<sub>20</sub>H<sub>23</sub>F<sub>3</sub>N<sub>2</sub>O+Na<sup>+</sup> Calcd: 387.1655, Found: 387.1645.

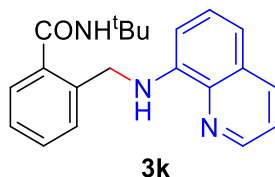

***N*-(tert-butyl)-2-((quinolin-8-ylamino)methyl)benzamide (3k)**, 38.0 mg, yield: 57%. White oil liquid.

**<sup>1</sup>HNMR** (300 MHz, CDCl<sub>3</sub>): δ 8.69-8.71 (m, 1H), 8.10 (d, *J* = 8.4 Hz, 1H), 7.60-7.63 (m, 1H), 7.35-7.49 (m, 5H), 7.15 (d, *J* = 7.8 Hz, 1H), 6.82 (d, *J* = 7.8 Hz, 2H), 6.41 (br, 1H), 4.58 (s, 2H), 1.27 (s, 9H).

**<sup>13</sup>CNMR** (75 MHz, CDCl<sub>3</sub>): δ 168.48, 147.14, 143.94, 137.99, 136.09, 135.45, 130.08, 129.92, 128.57, 128.50, 127.92, 127.66, 121.50, 115.40, 106.18, 51.53, 46.38, 28.53.

**HRMS (ESI):** C<sub>21</sub>H<sub>23</sub>N<sub>3</sub>O+Na<sup>+</sup> Calcd: 356.1733, Found: 356.1731.

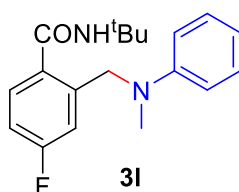

***N*-(tert-butyl)-4-fluoro-2-((methyl(phenyl)amino)methyl)benzamide (3l)**, 40.9 mg, yield: 65%. Yellow oil.

**<sup>1</sup>HNMR** (300 MHz, CDCl<sub>3</sub>): δ 7.43-7.48 (m, 1H), 7.20-7.23 (m, 2H), 6.94-6.99 (m, 2H), 6.72-6.79 (m, 3H), 6.05 (s, 1H), 4.63 (s, 2H), 3.00 (s, 3H), 1.42 (s, 9H).

**<sup>19</sup>FNMR** (282 MHz) δ -110.05.

**<sup>13</sup>CNMR** (75 MHz, CDCl<sub>3</sub>): δ 167.98, 149.47, 140.60 (d, *J* = 6.8 Hz), 132.80, 129.45 (d, *J* = 9.0 Hz), 129.19, 117.51, 115.16 (d, *J* = 22.5 Hz), 113.65 (d, *J* = 21 Hz), 113.00, 54.82, 51.84, 38.91, 28.82.

**HRMS (ESI):** C<sub>19</sub>H<sub>23</sub>FN<sub>2</sub>O+Na<sup>+</sup> Calcd: 337.1687, Found: 337.1680.

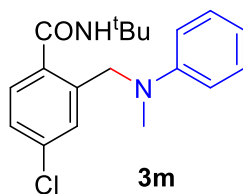

***N*-(tert-butyl)-4-chloro-2-((methyl(phenyl)amino)methyl)benzamide (3m)**, 45.0 mg, yield: 68%.

White solid, mp: 109-112°C.

<sup>1</sup>HNMR (300 MHz, CDCl<sub>3</sub>): δ 7.41 (d, *J* = 8.7 Hz, 1H), 7.21-7.27 (m, 4H), 6.74-6.80 (m, 3H), 6.13 (s, 1H), 4.58 (s, 2H), 2.98 (s, 3H), 1.40 (s, 9H).

<sup>13</sup>CNMR (75 MHz, CDCl<sub>3</sub>): δ 167.87, 149.59, 139.20, 136.07, 135.19, 129.19, 128.90, 128.28, 127.16, 117.73, 113.25, 54.89, 51.90, 38.90, 28.78.

**HRMS (ESI):** C<sub>19</sub>H<sub>23</sub>ClN<sub>2</sub>O+Na<sup>+</sup> Calcd: 353.1391, Found: 353.1381.

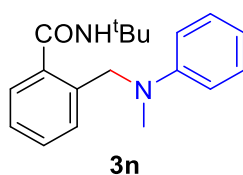

***N*-(tert-butyl)-2-((methyl(phenyl)amino)methyl)benzamide (3n)**, 36.2 mg, yield: 61%. Yellow oil.

<sup>1</sup>HNMR (300 MHz, CDCl<sub>3</sub>): δ 7.46-7.49 (m, 1H), 7.20-7.35 (m, 5H), 6.77 (d, *J* = 8.7 Hz, 3H), 6.19 (s, 1H), 4.63 (s, 2H), 2.98 (s, 3H), 1.40 (s, 9H).

<sup>13</sup>CNMR (75 MHz, CDCl<sub>3</sub>): δ 168.86, 149.78, 137.01, 136.55, 129.88, 129.13, 128.41, 127.50, 127.03, 117.34, 113.16, 54.75, 51.72, 38.73, 28.82.

**HRMS (ESI):** C<sub>19</sub>H<sub>24</sub>N<sub>2</sub>O+Na<sup>+</sup> Calcd: 319.1781, Found: 319.1771.

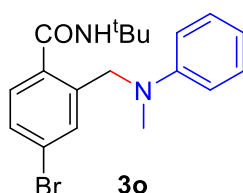

**4-bromo-*N*-(tert-butyl)-2-((methyl(phenyl)amino)methyl)benzamide (3o)**, 36.8 mg, yield: 49%. Yellow oil.

<sup>1</sup>HNMR (300 MHz, CDCl<sub>3</sub>): δ 7.41-7.43 (m, 2H), 7.32-7.35 (m, 1H), 7.21-7.24 (m, 2H), 6.74-6.81 (m, 3H), 6.11 (s, 1H), 4.57 (s, 2H), 2.97 (s, 3H), 1.39 (s, 9H).

<sup>13</sup>CNMR (75 MHz, CDCl<sub>3</sub>): δ 167.90, 149.66, 139.32, 135.74, 131.23, 130.20, 129.20, 129.06, 124.38,

117.81, 113.34, 54.91, 51.91, 38.89, 28.79.

**HRMS (ESI):** C<sub>19</sub>H<sub>23</sub>BrN<sub>2</sub>O+Na<sup>+</sup> Calcd: 397.0886, Found: 397.0874.

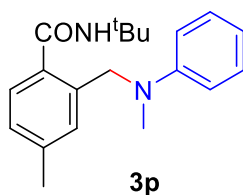

***N*-(tert-butyl)-4-methyl-2-((methyl(phenyl)amino)methyl)benzamide (3p)**, 44.7 mg, yield: 72%.

White solid, mp: 105-108°C.

<sup>1</sup>HNMR (300 MHz, CDCl<sub>3</sub>): δ 7.39 (d, *J* = 7.5 Hz, 1H), 7.22 (d, *J* = 7.5 Hz, 2H), 7.06-7.10 (m, 2H), 6.73-6.81 (m, 3H), 6.22 (s, 1H), 4.58 (s, 2H), 2.95 (s, 3H), 2.30 (s, 3H), 1.38 (s, 9H).

<sup>13</sup>CNMR (75 MHz, CDCl<sub>3</sub>): δ 168.91, 149.99, 140.01, 136.53, 134.27, 129.11, 127.73, 127.66, 117.38, 113.29, 112.51, 54.96, 51.57, 38.60, 28.82, 21.46.

**HRMS (ESI):** C<sub>20</sub>H<sub>26</sub>N<sub>2</sub>O+Na<sup>+</sup> Calcd: 333.1937, Found: 333.1931.

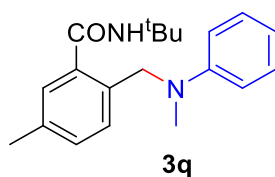

***N*-(tert-butyl)-5-methyl-2-((methyl(phenyl)amino)methyl)benzamide (3q)**, 45.9 mg, yield: 74%.

White solid, mp: 105-108°C.

<sup>1</sup>HNMR (300 MHz, CDCl<sub>3</sub>): δ 7.30 (s, 1H), 7.21 (d, *J* = 7.5 Hz, 2H), 7.12 (s, 2H), 6.72-6.81 (m, 3H), 6.27 (s, 1H), 4.55 (s, 2H), 2.94 (s, 3H), 2.34 (s, 3H), 1.38 (s, 9H).

<sup>13</sup>CNMR (75 MHz, CDCl<sub>3</sub>): δ 168.93, 149.88, 137.04, 136.89, 133.13, 130.46, 129.10, 128.74, 128.36, 117.45, 113.39, 54.51, 51.61, 38.57, 28.79, 20.90.

**HRMS (ESI):** C<sub>20</sub>H<sub>26</sub>N<sub>2</sub>O+Na<sup>+</sup> Calcd: 333.1937, Found: 333.1929.

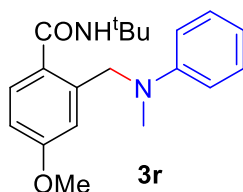

***N*-(tert-butyl)-4-methoxy-2-((methyl(phenyl)amino)methyl)benzamide (3r)**, 41.8 mg, yield: 64%. Yellow oil.

<sup>1</sup>HNMR (300 MHz, CDCl<sub>3</sub>): δ 7.47 (d, *J* = 7.8 Hz, 1H), 7.21 (d, *J* = 7.5 Hz, 2H), 6.77 (d, *J* = 8.7 Hz, 5H), 6.22 (s, 1H), 4.61 (s, 2H), 3.74 (s, 3H), 2.97 (s, 3H), 1.39 (s, 9H).

<sup>13</sup>CNMR (75 MHz, CDCl<sub>3</sub>): δ 168.56, 160.85, 149.82, 139.09, 129.46, 129.34, 129.10, 117.43, 114.38, 113.27, 111.40, 55.27, 55.16, 51.53, 38.71, 28.84.

**HRMS (ESI):** C<sub>20</sub>H<sub>26</sub>N<sub>2</sub>O<sub>2</sub>+Na<sup>+</sup> Calcd: 349.1886, Found: 349.1878.

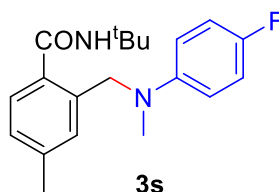

*N*-(*tert*-butyl)-2-(((4-fluorophenyl)(methyl)amino)methyl)-4-methylbenzamide (**3s**), 41.4 mg, yield: 63%. White solid, mp: 147-150°C.

<sup>1</sup>HNMR (300 MHz, CDCl<sub>3</sub>): δ 7.41 (d, *J* = 7.8 Hz, 1H), 7.09 (d, *J* = 7.8 Hz, 1H), 7.03 (s, 1H), 6.93 (t, *J* = 9.0 Hz, 2H), 6.71-6.77 (m, 2H), 6.38 (s, 1H), 4.48 (s, 2H), 2.89 (s, 3H), 2.31 (s, 3H), 1.37 (s, 9H).

<sup>19</sup>FNMR (282 MHz): δ -127.59.

<sup>13</sup>CNMR (75 MHz, CDCl<sub>3</sub>): δ 168.82, 157.66, 154.52, 146.68, 139.98, 136.16, 134.40, 129.56, 127.92 (d, *J* = 12.0 Hz), 115.45 (d, *J* = 21.2 Hz), 114.99 (d, *J* = 7.5 Hz), 55.92, 51.53, 39.29, 28.83, 21.42.

HRMS (ESI): C<sub>20</sub>H<sub>25</sub>FN<sub>2</sub>O+Na<sup>+</sup> Calcd: 351.1843, Found: 351.1833.

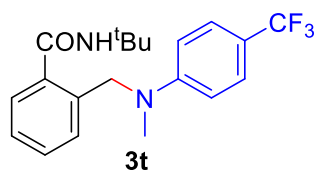

*N*-(*tert*-butyl)-2-((methyl(4-(trifluoromethyl)phenyl)amino)methyl)benzamide (**3t**), 50.3 mg, yield: 69%. White solid, mp: 127-130°C.

<sup>1</sup>HNMR (300 MHz, CDCl<sub>3</sub>): δ 7.41 (d, *J* = 8.1 Hz, 3H), 7.26-7.35 (m, 2H), 7.15 (d, *J* = 7.2 Hz, 1H), 6.70 (d, *J* = 8.4 Hz, 2H), 5.78 (s, 1H), 4.79 (s, 2H), 3.09 (s, 3H), 1.46 (s, 9H).

<sup>19</sup>FNMR (282 MHz): δ -60.87.

<sup>13</sup>CNMR (75 MHz, CDCl<sub>3</sub>): δ 168.90, 151.59, 136.38, 130.14, 127.12, 127.04, 127.00, 126.89, 126.44, 126.39, 111.31, 54.09, 51.92, 38.86, 28.87.

HRMS (ESI): C<sub>20</sub>H<sub>23</sub>F<sub>3</sub>N<sub>2</sub>O+Na<sup>+</sup> Calcd: 387.1655, Found: 387.1646.

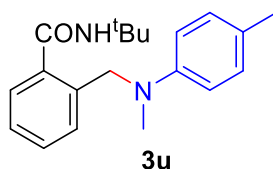

*N*-(*tert*-butyl)-2-((methyl(*p*-tolyl)amino)methyl)benzamide (**3u**), 39.7 mg, yield: 64%. White solid, mp: 118-121°C.

<sup>1</sup>HNMR (300 MHz, CDCl<sub>3</sub>): δ 7.50-7.53 (m, 1H), 7.21-7.32 (m, 3H), 7.04 (d, *J* = 8.1 Hz, 2H), 6.72 (d, *J* = 8.4 Hz, 2H), 6.51 (s, 1H), 4.52 (s, 2H), 2.90 (s, 3H), 2.25 (s, 3H), 1.38 (s, 9H).

<sup>13</sup>CNMR (75 MHz, CDCl<sub>3</sub>): δ 168.77, 147.78, 137.27, 136.26, 129.81, 129.65, 129.04, 127.90, 127.16, 114.00, 55.33, 51.62, 39.01, 28.80, 20.30.

HRMS (ESI): C<sub>20</sub>H<sub>26</sub>N<sub>2</sub>O+Na<sup>+</sup> Calcd: 333.1937, Found: 333.1927.

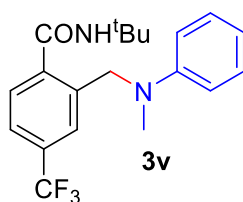

*N*-(*tert*-butyl)-2-((methyl(phenyl)amino)methyl)-4-(trifluoromethyl)benzamide (**3v**), 45.2mg, yield: 62%. Pale yellow solid, mp: 115-117°C.

<sup>1</sup>HNMR (300 MHz, CDCl<sub>3</sub>): δ 7.74 (d, *J* = 7.8 Hz, 1H), 7.59 (d, *J* = 7.2 Hz, 1H), 7.43 (t, *J* = 7.8 Hz, 1H), 7.21-7.27 (m, 2H), 6.87 (d, *J* = 8.4 Hz, 2H), 6.80 (t, *J* = 7.5 Hz, 1H), 5.89 (br, 1H), 4.64 (s, 2H), 2.70 (s, 3H), 1.19 (s, 9H).

<sup>19</sup>FNMR (282 MHz, CDCl<sub>3</sub>): δ -58.01.

<sup>13</sup>CNMR (75 MHz, CDCl<sub>3</sub>): δ 168.10, 150.07, 140.53, 135.71, 132.35, 129.87, 127.63, 126.96 (q, *j* = 6.0 Hz), 125.93 (t, *J* = 266.25 Hz), 118.55, 114.30, 51.60, 50.88 (d, *J* = 2.3 Hz), 37.53, 28.69.

HRMS (ESI): C<sub>20</sub>H<sub>23</sub>F<sub>3</sub>N<sub>2</sub>O+Na<sup>+</sup> Calcd: 387.1655, Found: 387.1661.

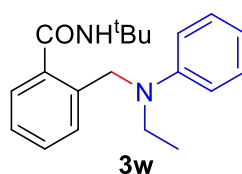

*N*-(*tert*-butyl)-2-((ethyl(phenyl)amino)methyl)benzamide (**3w**), 35.4 mg, yield: 57%. White solid, mp: 114-117°C.

<sup>1</sup>HNMR (300 MHz, CDCl<sub>3</sub>): δ 7.37-7.40 (m, 1H), 7.18-7.24 (m, 3H), 7.12 (t, *J* = 7.8 Hz, 2H), 6.60-6.65 (m, 3H), 6.07 (br, 1H), 4.55 (s, 2H), 3.37 (q, *J* = 7.2 Hz, 2H), 1.34 (s, 9H), 1.09 (t, *J* = 6.9 Hz, 3H).

<sup>13</sup>CNMR (75 MHz, CDCl<sub>3</sub>): δ 168.94, 148.25, 136.74, 129.92, 129.20, 128.14, 127.40, 126.92, 116.73, 112.96, 51.81, 51.72, 44.98, 28.83, 11.72.

HRMS (ESI): C<sub>20</sub>H<sub>26</sub>N<sub>2</sub>O+Na<sup>+</sup> Calcd: 333.1937, Found: 333.1944.

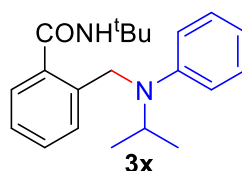

*N*-(*tert*-butyl)-2-((isopropyl(phenyl)amino)methyl)benzamide (**3x**), 33.1 mg, yield: 51%. White solid, mp: 144-146°C.

<sup>1</sup>HNMR (300 MHz, CDCl<sub>3</sub>): δ 7.38 (t, *J* = 7.8 Hz, 2H), 7.28-7.31 (m, 1H), 7.23 (d, *J* = 7.5 Hz, 1H), 7.17 (t, *J* = 7.8 Hz, 2H), 6.65-6.89 (m, 3H), 5.78 (br, 1H), 4.59 (s, 2H), 4.21-4.30 (m, 1H), 1.49 (s, 9H), 1.20 (d, *J* = 6.6 Hz, 6H).

<sup>13</sup>CNMR (75 MHz, CDCl<sub>3</sub>): δ 169.26, 149.14, 138.90, 135.60, 129.88, 129.11, 127.72, 126.30, 116.37, 113.15, 51.86, 48.19, 46.24, 28.92, 19.74.

HRMS (ESI): C<sub>21</sub>H<sub>28</sub>N<sub>2</sub>O+Na<sup>+</sup> Calcd: 347.2094, Found: 347.2111.

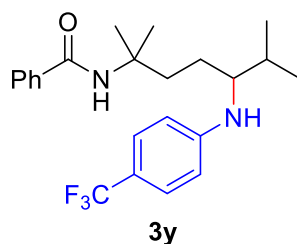

*N*-(2,6-dimethyl-5-((4-(trifluoromethyl)phenyl)amino)heptan-2-yl)benzamide (**3y**), 41.5 mg, yield: 51%. Colorless oil.

<sup>1</sup>HNMR (300 MHz, CDCl<sub>3</sub>): δ 7.65 (d, *J* = 6.9 Hz, 2H), 7.37-7.51 (m, 3H), 7.30 (d, *J* = 8.7 Hz, 2H), 6.56 (d, *J* = 8.7 Hz, 2H), 5.81 (s, 1H), 3.97 (d, *J* = 7.2 Hz, 1H), 3.23 (br, 1H), 1.88-1.95 (m, 1H), 1.80-1.86 (m, 2H), 1.38-1.40 (m, 6H), 1.25-1.32 (m, 2H), 0.88-0.95 (m, 6H).

<sup>19</sup>FNMR (282 MHz) δ -60.85.

<sup>13</sup>CNMR (75 MHz, CDCl<sub>3</sub>): δ 167.06, 150.95, 135.75, 131.22, 128.56, 126.64, 126.59, 117.82 (d, *J* = 32.3 Hz), 111.89, 58.16, 54.11, 35.73, 31.10, 27.61, 27.45, 25.69, 18.79, 18.18

HRMS (ESI): C<sub>23</sub>H<sub>29</sub>F<sub>3</sub>N<sub>2</sub>O+Na<sup>+</sup> Calcd: 429.2124, Found: 429.2119.

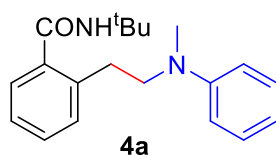

*N*-(tert-butyl)-2-(2-(methyl(phenyl)amino)ethyl)benzamide (**4a**), 46.6 mg, yield: 75%. White solid, mp: 53-56°C.

<sup>1</sup>HNMR (300 MHz, CDCl<sub>3</sub>): δ 7.32 (d, *J* = 6.9 Hz, 2H), 7.21-7.26 (m, 4H), 6.77 (d, *J* = 8.4 Hz, 2H), 6.68 (t, *J* = 7.2 Hz, 1H), 5.61 (s, 1H), 3.63 (t, *J* = 7.5 Hz, 2H), 2.98 (t, *J* = 8.1 Hz, 2H), 2.92 (s, 3H), 1.47 (s, 9H).

<sup>13</sup>CNMR (75 MHz, CDCl<sub>3</sub>): δ 169.67, 148.87, 138.14, 137.65, 130.90, 129.67, 129.23, 126.60, 126.21, 115.90, 112.03, 54.59, 51.84, 38.21, 30.67, 28.84.

HRMS (ESI) C<sub>20</sub>H<sub>26</sub>N<sub>2</sub>O+Na<sup>+</sup> Calcd: 333.1937, Found: 333.1935.

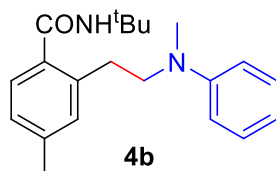

*N*-(tert-butyl)-4-methyl-2-(2-(methyl(phenyl)amino)ethyl)benzamide (**4b**), 43.5 mg, yield: 67%. Yellow oil.

<sup>1</sup>HNMR (300 MHz, CDCl<sub>3</sub>): δ 7.20-7.27 (m, 3H), 7.00-7.03 (m, 2H), 6.78 (d, *J* = 8.1 Hz, 2H), 6.68 (t, *J* = 7.2 Hz, 1H), 5.59 (s, 1H), 3.61 (t, *J* = 7.5 Hz, 2H), 2.92-2.98 (m, 5H), 2.34 (s, 3H), 1.46 (s, 9H).

<sup>13</sup>CNMR (75 MHz, CDCl<sub>3</sub>): δ 169.77, 148.91, 139.68, 137.69, 135.33, 131.61, 129.23, 126.80, 126.68, 115.86, 112.04, 54.60, 51.73, 38.17, 30.59, 28.85, 21.25.

HRMS (ESI) C<sub>21</sub>H<sub>28</sub>N<sub>2</sub>O+Na<sup>+</sup> Calcd: 347.2094, Found: 347.2092.

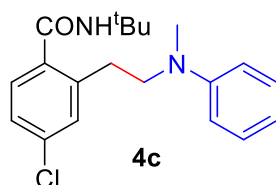

*N*-(tert-butyl)-4-chloro-2-(2-(methyl(phenyl)amino)ethyl)benzamide (**4c**), 51.0 mg, yield: 74%. White solid, mp: 99-102°C.

**<sup>1</sup>HNMR** (300 MHz, CDCl<sub>3</sub>): δ 7.16-7.28 (m, 5H), 6.76 (d, *J* = 8.1 Hz, 2H), 6.70 (t, *J* = 7.2 Hz, 1H), 5.61 (s, 1H), 3.61 (t, *J* = 7.5 Hz, 2H), 2.91-2.97 (m, 5H), 1.45 (s, 9H).

**<sup>13</sup>CNMR** (75 MHz, CDCl<sub>3</sub>): δ 168.67, 148.74, 139.89, 136.48, 135.34, 130.80, 129.28, 128.03, 126.31, 116.18, 112.12, 54.40, 52.01, 38.26, 30.57, 28.79.

**HRMS (ESI):** C<sub>20</sub>H<sub>25</sub>ClN<sub>2</sub>O+Na<sup>+</sup> Calcd: 367.1548, Found: 367.1544.

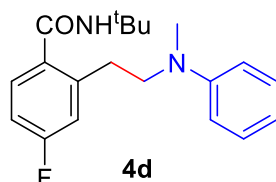

***N*-(tert-butyl)-4-fluoro-2-(2-(methyl(phenyl)amino)ethyl)benzamide (4d)**, 47.3 mg, yield: 72%. White solid, mp: 63-66°C.

**<sup>1</sup>HNMR** (300 MHz, CDCl<sub>3</sub>): δ 7.21-7.31 (m, 3H), 6.90-6.95 (m, 2H), 6.76 (d, *J* = 8.1 Hz, 2H), 6.69 (t, *J* = 7.2 Hz, 1H), 5.57 (s, 1H), 3.63 (t, *J* = 7.5 Hz, 2H), 2.98 (t, *J* = 7.8 Hz, 2H), 2.92 (s, 3H), 1.46 (s, 9H).

**<sup>19</sup>FNMR** (282 MHz): δ -111.22.

**<sup>13</sup>CNMR** (75 MHz, CDCl<sub>3</sub>): δ 168.80, 164.72, 161.42, 148.77, 140.91 (d, *J* = 5.3 Hz), 134.28, 129.27, 128.61 (d, *J* = 9 Hz), 117.58 (d, *J* = 21 Hz), 116.15, 113.02 (d, *J* = 21 Hz), 112.11, 54.37, 51.92, 38.25, 30.77, 28.80.

**HRMS (ESI):** C<sub>20</sub>H<sub>25</sub>FN<sub>2</sub>O+Na<sup>+</sup> Calcd: 351.1843, Found: 351.1841.

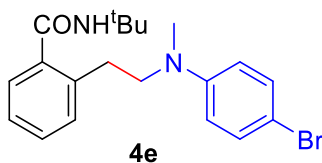

**2-(2-((4-bromophenyl)(methyl)amino)ethyl)-*N*-(tert-butyl)benzamide (4e)**, 52.9 mg, yield: 68%. White solid, mp: 70-72°C.

**<sup>1</sup>HNMR** (300 MHz, CDCl<sub>3</sub>): δ 7.17-7.35 (m, 6H), 6.64 (d, *J* = 9.0 Hz, 2H), 5.60 (s, 1H), 3.61 (t, *J* = 7.5 Hz, 2H), 2.94 (t, *J* = 8.1 Hz, 2H), 2.89 (s, 3H), 1.47 (s, 9H).

**<sup>13</sup>CNMR** (75 MHz, CDCl<sub>3</sub>): δ 169.60, 147.87, 138.08, 137.44, 131.80, 130.93, 129.73, 126.59, 126.33, 113.67, 107.73, 54.57, 51.87, 38.31, 30.63, 28.85.

**HRMS (ESI):** C<sub>20</sub>H<sub>25</sub>BrN<sub>2</sub>O+Na<sup>+</sup> Calcd: 411.1042, Found: 411.1033.

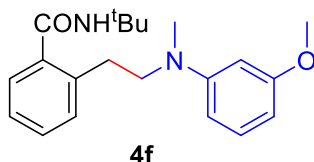

***N*-(tert-butyl)-2-(2-((3-methoxyphenyl)(methyl)amino)ethyl)benzamide (4f)**, 49.7 mg, yield: 73%. Yellow oil.

**<sup>1</sup>H NMR** (300 MHz, CDCl<sub>3</sub>): δ 7.23-7.28 (m, 2H), 7.04-7.19 (m, 3H), 6.31-6.35 (m, 1H), 6.17-6.24 (m, 2H), 5.53 (s, 1H), 3.74 (s, 3H), 3.55 (t, *J* = 7.2 Hz, 2H), 2.91 (t, *J* = 8.1 Hz, 2H), 2.83 (s, 3H), 1.39 (s, 9H).

**<sup>13</sup>C NMR** (75 MHz, CDCl<sub>3</sub>): δ 168.61, 159.85, 149.32, 137.06, 136.66, 129.92, 128.84, 128.65, 125.56, 125.19, 104.18, 99.95, 97.46, 54.11, 53.57, 50.79, 37.25, 29.82, 27.79.

**HRMS (ESI):** C<sub>21</sub>H<sub>28</sub>N<sub>2</sub>O<sub>2</sub>+Na<sup>+</sup> Calcd: 363.2043, Found: 363.2039.

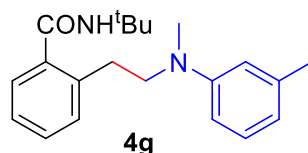

***N*-(tert-butyl)-2-(2-(methyl(*m*-tolyl)amino)ethyl)benzamide (4g)**, 43.5 mg, yield: 67%. Yellow oil.

**<sup>1</sup>H NMR** (300 MHz, CDCl<sub>3</sub>): δ 7.32 (d, *J* = 7.2 Hz, 2H), 7.15-7.25 (m, 2H), 7.09-7.13 (m, 1H), 6.59 (s, 2H), 6.52 (d, *J* = 7.2 Hz, 1H), 5.59 (s, 1H), 3.61 (t, *J* = 7.2 Hz, 2H), 2.98 (t, *J* = 7.8 Hz, 2H), 2.90 (s, 3H), 2.32 (s, 3H), 1.46 (s, 9H).

**<sup>13</sup>C NMR** (75 MHz, CDCl<sub>3</sub>): δ 169.63, 149.00, 138.84, 138.15, 137.79, 130.88, 129.64, 129.06, 126.59, 126.17, 116.93, 112.83, 109.30, 54.65, 51.80, 38.25, 30.79, 28.83, 21.95.

**HRMS (ESI):** C<sub>21</sub>H<sub>28</sub>N<sub>2</sub>O+Na<sup>+</sup> Calcd: 347.2094, Found: 347.2086.

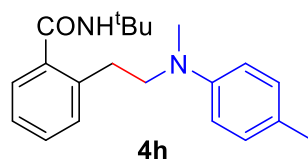

***N*-(tert-butyl)-2-(2-(methyl(*p*-tolyl)amino)ethyl)benzamide (4h)**, 46.7 mg, yield: 72%. White solid, mp: 79-82°C.

**<sup>1</sup>H NMR** (300 MHz, CDCl<sub>3</sub>): δ 7.31 (d, *J* = 6.9 Hz, 2H), 7.22 (d, *J* = 7.2 Hz, 2H), 7.05 (d, *J* = 8.4 Hz, 2H), 6.70 (d, *J* = 8.4 Hz, 2H), 5.60 (s, 1H), 3.59 (t, *J* = 7.5 Hz, 2H), 2.96 (t, *J* = 7.8 Hz, 2H), 2.89 (s, 3H), 2.25 (s, 3H), 1.46 (s, 9H).

**<sup>13</sup>C NMR** (75 MHz, CDCl<sub>3</sub>): δ 169.66, 146.91, 138.15, 137.78, 130.87, 129.75, 129.63, 126.60, 126.14, 125.19, 112.45, 54.93, 51.81, 38.37, 30.50, 28.84, 20.22.

**HRMS (ESI):** C<sub>21</sub>H<sub>28</sub>N<sub>2</sub>O+Na<sup>+</sup> Calcd: 347.2094, Found: 347.2085.

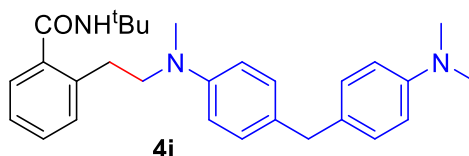

***N*-(tert-butyl)-2-(2-((4-(dimethylamino)benzyl)phenyl)(methylamino)ethyl)benzamide (4i)**, 63.0 mg, yield: 71%. Yellow oil.



**<sup>1</sup>HNMR** (300 MHz, CDCl<sub>3</sub>): δ 7.30 (d, *J* = 6.9 Hz, 2H), 7.21 (d, *J* = 7.2 Hz, 2H), 7.03-7.08 (m, 4H), 6.69 (d, *J* = 8.4 Hz, 4H), 5.59 (s, 1H), 3.80 (s, 2H), 3.59 (t, *J* = 7.5 Hz, 2H), 2.96 (t, *J* = 7.8 Hz, 2H), 2.90 (s, 6H), 2.88 (s, 3H), 1.45 (s, 9H).

**<sup>13</sup>CNMR** (75 MHz, CDCl<sub>3</sub>): δ 169.65, 149.06, 147.21, 138.15, 137.77, 130.85, 130.50, 129.62, 129.57, 129.52, 129.41, 126.59, 126.13, 113.07, 112.33, 54.85, 51.81, 40.96, 39.87, 38.32, 30.62, 28.84.

**HRMS (ESI):** C<sub>29</sub>H<sub>37</sub>N<sub>3</sub>O+Na<sup>+</sup> Calcd: 466.2829, Found: 466.2825.

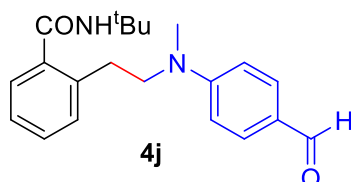

***N*-(tert-butyl)-2-(2-((4-formylphenyl)(methyl)amino)ethyl)benzamide (4j)**, 44.7 mg, yield: 66%.  
White solid, mp: 99-102°C.

**<sup>1</sup>HNMR** (300 MHz, CDCl<sub>3</sub>): δ 9.64 (s, 1H), 7.65 (d, *J* = 8.7 Hz, 2H), 7.25 (t, *J* = 7.2 Hz, 2H), 7.10-7.16 (m, 2H), 6.72 (d, *J* = 9 Hz, 2H), 5.59 (s, 1H), 3.68 (t, *J* = 7.5 Hz, 2H), 2.89-2.95 (m, 5H), 1.41 (s, 9H).

**<sup>13</sup>CNMR** (75 MHz, CDCl<sub>3</sub>): δ 189.20, 168.53, 152.34, 136.98, 135.85, 131.13, 129.96, 128.83, 125.63, 125.59, 123.98, 109.97, 53.21, 50.90, 37.44, 30.17, 27.82.

**HRMS (ESI):** C<sub>21</sub>H<sub>26</sub>N<sub>2</sub>O<sub>2</sub>+Na<sup>+</sup> Calcd: 361.1886, Found: 361.1883.

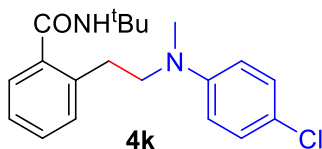

***N*-(tert-butyl)-2-(2-((4-chlorophenyl)(methyl)amino)ethyl)benzamide (4k)**, 50.4 mg, yield: 73%.  
White solid, mp: 96-99°C.

**<sup>1</sup>HNMR** (300 MHz, CDCl<sub>3</sub>): δ 7.30-7.33 (m, 2H), 7.14-7.24 (m, 4H), 6.68 (d, *J* = 8.7 Hz, 2H), 5.60 (s, 1H), 3.61 (t, *J* = 7.5 Hz, 2H), 2.95 (t, *J* = 7.8 Hz, 2H), 2.89 (s, 3H), 1.47 (s, 9H).

**<sup>13</sup>CNMR** (75 MHz, CDCl<sub>3</sub>): δ 169.61, 147.48, 138.08, 137.44, 130.91, 129.71, 128.92, 126.58, 126.31, 120.66, 113.16, 54.66, 51.85, 38.35, 30.62, 28.84.

**HRMS (ESI):** C<sub>20</sub>H<sub>25</sub>ClN<sub>2</sub>O+Na<sup>+</sup> Calcd: 367.1548, Found: 367.1538.

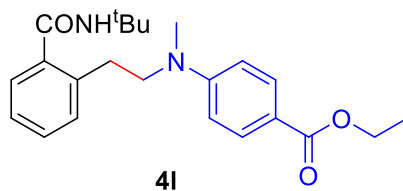

**ethyl 4-((2-(tert-butylcarbamoyl)phenethyl)(methyl)amino)benzoate (41)**, 54.3 mg, yield: 71%.  
White solid, mp: 96-99°C.

**<sup>1</sup>H NMR** (300 MHz, CDCl<sub>3</sub>): δ 7.90 (d, *J* = 8.7 Hz, 2H), 7.16-7.34 (m, 4H), 6.71 (d, *J* = 9.0 Hz, 2H), 5.64 (s, 1H), 4.31 (q, *J* = 7.2 Hz, 2H), 3.71 (t, *J* = 7.5 Hz, 2H), 2.95-3.01 (m, 5H), 1.48 (s, 9H), 1.36 (t, *J* = 7.2 Hz, 3H).

**<sup>13</sup>C NMR** (75 MHz, CDCl<sub>3</sub>): δ 169.58, 167.06, 152.04, 138.03, 137.16, 131.36, 130.97, 129.78, 126.62, 126.46, 117.01, 110.54, 60.04, 54.15, 51.88, 38.32, 31.00, 28.84, 14.05.

**HRMS (ESI):** C<sub>23</sub>H<sub>30</sub>N<sub>2</sub>O<sub>3</sub>+Na<sup>+</sup> Calcd: 405.2149, Found: 405.2142.

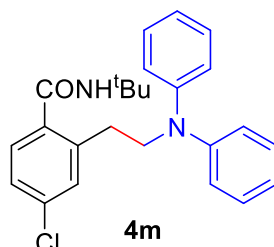

***N*-(tert-butyl)-4-chloro-2-(2-(diphenylamino)ethyl)benzamide (4m)**, 56.2 mg, yield: 69%. White solid, mp: 120-121°C.

**<sup>1</sup>H NMR** (300 MHz, CDCl<sub>3</sub>): δ 7.14-7.29 (m, 7H), 7.01 (d, *J* = 7.8 Hz, 4H), 6.49 (t, *J* = 7.2 Hz, 2H), 5.48 (s, 1H), 3.99 (t, *J* = 7.5 Hz, 2H), 3.08 (t, *J* = 7.8 Hz, 2H), 1.41 (s, 9H).

**<sup>13</sup>C NMR** (75 MHz, CDCl<sub>3</sub>): δ 168.64, 147.67, 139.53, 136.51, 135.31, 130.89, 129.33, 127.91, 126.39, 121.28, 120.96, 53.55, 51.99, 31.50, 28.77.

**HRMS (ESI):** C<sub>25</sub>H<sub>27</sub>ClN<sub>2</sub>O+Na<sup>+</sup> Calcd: 429.1704, Found: 429.1705.

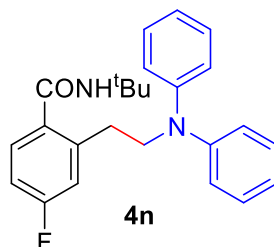

***N*-(tert-butyl)-2-(2-(diphenylamino)ethyl)-4-fluorobenzamide (4n)**, 53.9 mg, yield: 69%. White solid, mp: 144-147°C.

**<sup>1</sup>H NMR** (300 MHz, CDCl<sub>3</sub>): δ 7.23-7.28 (m, 5H), 6.84-7.03 (m, 8H), 5.46 (s, 1H), 4.01 (t, *J* = 7.5 Hz, 2H), 3.10 (t, *J* = 7.8 Hz, 2H), 1.42 (s, 9H).

**<sup>19</sup>F NMR** (282 MHz) δ: -111.21.

**<sup>13</sup>C NMR** (75 MHz, CDCl<sub>3</sub>): δ 168.76, 164.69, 161.38, 147.68, 140.55 (d, *J* = 7.5 Hz), 134.31, 129.32, 128.50 (d, *J* = 8.3 Hz), 121.10 (d, *J* = 24.0 Hz), 117.70 (d, *J* = 21.0 Hz), 113.09 (d, *J* = 21 Hz), 53.53, 51.90, 31.64, 28.77.

**HRMS (ESI):** C<sub>25</sub>H<sub>27</sub>FN<sub>2</sub>O+Na<sup>+</sup> Calcd: 413.2000, Found: 413.1997.

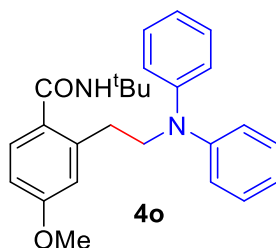

***N*-(tert-butyl)-2-(2-(diphenylamino)ethyl)-4-methoxybenzamide (4o)**, 55.5 mg, yield: 69%. White solid, mp: 84-87°C.

**<sup>1</sup>HNMR** (300 MHz, CDCl<sub>3</sub>): δ 7.22-7.28 (m, 5H), 7.02 (d, *J* = 7.8 Hz, 4H), 6.92 (t, *J* = 7.2 Hz, 2H), 6.65-6.72 (m, 2H), 5.48 (s, 1H), 4.01 (t, *J* = 7.5 Hz, 2H), 3.76 (s, 3H), 3.12 (t, *J* = 7.8 Hz, 2H), 1.41 (s, 9H).

**<sup>13</sup>CNMR** (75 MHz, CDCl<sub>3</sub>): δ 169.42, 160.33, 147.79, 139.74, 130.76, 129.23, 128.19, 121.07, 120.95, 116.64, 111.07, 55.30, 53.68, 51.63, 31.80, 28.81.

**HRMS (ESI)**: C<sub>26</sub>H<sub>30</sub>N<sub>2</sub>O<sub>2</sub>+Na<sup>+</sup> Calcd: 425.2199, Found: 425.2195.

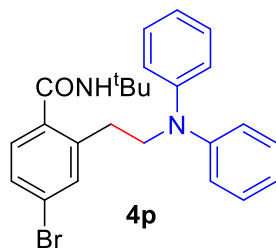

**4-bromo-*N*-(tert-butyl)-2-(2-(diphenylamino)ethyl)benzamide (4p)**, 65.9 mg, yield: 73%. White solid, mp: 170-173°C.

**<sup>1</sup>HNMR** (300 MHz, CDCl<sub>3</sub>): δ 7.16-7.33 (m, 7H), 7.02 (d, *J* = 7.8 Hz, 4H), 6.93 (t, *J* = 7.2 Hz, 2H), 5.48 (s, 1H), 4.01 (t, *J* = 7.8 Hz, 2H), 3.11 (t, *J* = 7.8 Hz, 2H), 1.42 (s, 9H).

**<sup>13</sup>CNMR** (75 MHz, CDCl<sub>3</sub>): δ 169.64, 147.78, 138.20, 137.71, 130.94, 129.63, 129.26, 126.53, 126.29, 121.09, 120.94, 53.84, 51.79, 31.53, 28.79.

**HRMS (ESI)**: C<sub>25</sub>H<sub>27</sub>BrN<sub>2</sub>O+Na<sup>+</sup> Calcd: 473.1199, Found: 473.1189.

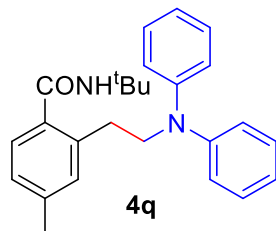

***N*-(tert-butyl)-2-(2-(diphenylamino)ethyl)-4-methylbenzamide (4q)**, 55.7 mg, yield: 72%. White solid, mp: 119-122°C.

**<sup>1</sup>HNMR** (300 MHz, CDCl<sub>3</sub>): δ 7.23-7.29 (m, 4H), 7.19 (d, *J* = 7.5 Hz, 1H), 7.04 (d, *J* = 8.1 Hz, 4H), 6.90-6.99 (m, 4H), 5.48 (s, 1H), 3.99 (t, *J* = 7.5 Hz, 2H), 3.09 (t, *J* = 8.1 Hz, 2H), 2.31 (s, 3H), 1.41 (s, 9H).

<sup>13</sup>CNMR (75 MHz, CDCl<sub>3</sub>): δ 169.74, 147.81, 139.62, 137.31, 135.39, 131.62, 129.24, 126.85, 126.59, 121.05, 120.96, 53.88, 51.69, 31.52, 28.80, 21.20.

HRMS (ESI): C<sub>26</sub>H<sub>30</sub>N<sub>2</sub>O+Na<sup>+</sup> Calcd: 409.2250, Found: 409.2244.

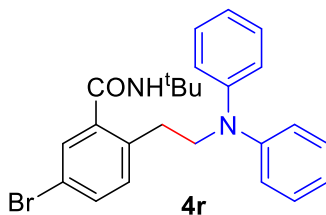

**5-bromo-*N*-(tert-butyl)-2-(2-(diphenylamino)ethyl)benzamide (4r)**, 61.4 mg, yield: 68%. White solid, mp: 184-187°C.

<sup>1</sup>HNMR (300 MHz, CDCl<sub>3</sub>): δ 7.40-7.42 (m, 2H), 7.22-7.28 (m, 4H), 6.91-7.06 (m, 7H), 5.46 (s, 1H), 3.98 (t, *J* = 7.5 Hz, 2H), 3.05 (t, *J* = 7.8 Hz, 2H), 1.42 (s, 9H).

<sup>13</sup>CNMR (75 MHz, CDCl<sub>3</sub>): δ 167.94, 147.67, 139.84, 136.39, 132.69, 132.54, 129.41, 129.30, 121.24, 120.92, 119.81, 53.53, 52.08, 31.10, 28.72.

HRMS (ESI): C<sub>25</sub>H<sub>27</sub>BrN<sub>2</sub>O+Na<sup>+</sup> Calcd: 473.1199, Found: 473.1191.

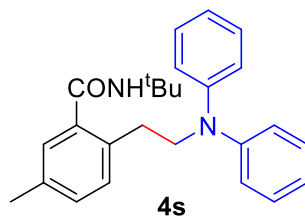

***N*-(tert-butyl)-2-(2-(diphenylamino)ethyl)-5-methylbenzamide (4s)**, 56.4 mg, yield: 73%. White solid, mp: 138-141°C.

<sup>1</sup>HNMR (300 MHz, CDCl<sub>3</sub>): δ 7.22-7.28 (m, 4H), 7.01-7.12 (m, 7H), 6.93 (t, *J* = 7.2 Hz, 2H), 5.48 (s, 1H), 3.97 (t, *J* = 7.8 Hz, 2H), 3.06 (t, *J* = 7.8 Hz, 2H), 2.32 (s, 3H), 1.42 (s, 9H).

<sup>13</sup>CNMR (75 MHz, CDCl<sub>3</sub>): δ 169.78, 147.79, 138.12, 135.97, 134.08, 130.79, 130.27, 129.25, 127.14, 121.05, 120.94, 53.94, 51.75, 31.05, 28.80, 20.88.

HRMS (ESI): C<sub>26</sub>H<sub>30</sub>N<sub>2</sub>O+Na<sup>+</sup> Calcd: 409.2250, Found: 409.2245.

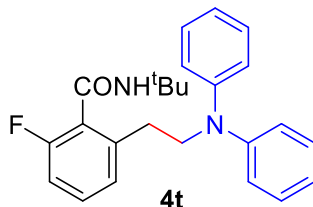

***N*-(tert-butyl)-2-(2-(diphenylamino)ethyl)-6-fluorobenzamide (4t)**, 52.3 mg, yield: 67%. White solid, mp: 162-165°C.

<sup>1</sup>HNMR (300 MHz, CDCl<sub>3</sub>): δ 7.23-7.29 (m, 5H), 6.90-7.03 (m, 8H), 5.51 (s, 1H), 4.01 (t, *J* = 7.5 Hz, 2H), 3.05 (t, *J* = 7.8 Hz, 2H), 1.42 (s, 9H).

<sup>19</sup>FNMR (282 MHz): δ -116.87.

$^{13}\text{C}$ NMR (75 MHz,  $\text{CDCl}_3$ ):  $\delta$  164.29, 160.61, 157.36, 147.66, 139.78 (d,  $J = 3.0$  Hz), 130.30 (d,  $J = 9.0$  Hz), 129.32, 126.33 (d,  $J = 18.0$  Hz), 126.08 (d,  $J = 3.0$  Hz), 121.10 (d,  $J = 24.1$  Hz), 113.64 (d,  $J = 22.5$  Hz), 53.66, 52.28, 31.37, 28.77.

**HRMS (ESI):**  $\text{C}_{25}\text{H}_{27}\text{FN}_2\text{O}+\text{Na}^+$  Calcd: 413.2000, Found: 413.1995.

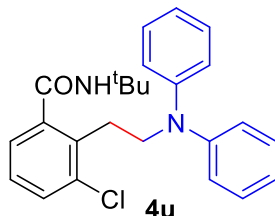

***N*-(tert-butyl)-3-chloro-2-(2-(diphenylamino)ethyl)benzamide (4u)**, 51.3 mg, yield: 63%. White solid, mp: 91-94°C.

$^1\text{H}$ NMR (300 MHz,  $\text{CDCl}_3$ ):  $\delta$  7.35-7.39 (m, 1H), 7.24-7.30 (m, 4H), 7.13-7.19 (m, 6H), 6.94 (t,  $J = 7.2$  Hz, 2H), 5.49 (s, 1H), 4.01 (t,  $J = 8.1$  Hz, 2H), 3.20 (t,  $J = 8.4$  Hz, 2H), 1.42 (s, 9H).

$^{13}\text{C}$ NMR (75 MHz,  $\text{CDCl}_3$ ):  $\delta$  168.65, 147.71, 140.76, 135.74, 134.57, 130.68, 129.21, 127.46, 124.95, 121.14, 52.08, 51.53, 29.36, 28.80.

**HRMS (ESI):**  $\text{C}_{25}\text{H}_{27}\text{ClN}_2\text{O}+\text{Na}^+$  Calcd: 429.1704, Found: 429.1703.

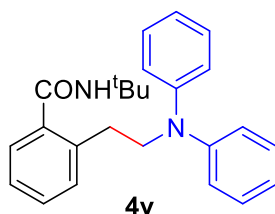

***N*-(tert-butyl)-2-(2-(diphenylamino)ethyl)benzamide (4v)**, 56.6 mg, yield: 76%. White solid, mp: 176-178°C.

$^1\text{H}$ NMR (300 MHz,  $\text{CDCl}_3$ ):  $\delta$  7.16-7.31 (m, 8H), 7.02 (d,  $J = 7.8$  Hz, 4H), 6.93 (t,  $J = 7.2$  Hz, 2H), 5.49 (s, 1H), 4.01 (t,  $J = 7.5$  Hz, 2H), 3.11 (t,  $J = 7.8$  Hz, 2H), 1.42 (s, 9H).

$^{13}\text{C}$ NMR (75 MHz,  $\text{CDCl}_3$ ):  $\delta$  169.64, 147.77, 138.19, 137.31, 130.95, 129.64, 129.27, 126.54, 126.29, 121.09, 120.93, 53.84, 51.80, 31.53, 28.79.

**HRMS (ESI):**  $\text{C}_{25}\text{H}_{28}\text{N}_2\text{O}+\text{Na}^+$  Calcd: 395.2094, Found: 395.2090.

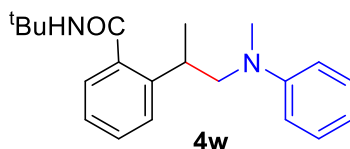

***N*-(tert-butyl)-2-(1-(methyl(phenyl)amino)propan-2-yl)benzamide (4w)**, 38.3 mg, yield: 59%. White solid, mp: 78-81°C.

$^1\text{H}$ NMR (300 MHz,  $\text{CDCl}_3$ ):  $\delta$  7.40 (s, 2H), 7.16-7.26 (m, 4H), 6.68 (d,  $J = 8.7$  Hz, 3H), 5.49 (s, 1H), 3.40-3.67 (m, 3H), 2.79 (s, 3H), 1.28-1.33 (m, 12H).

$^{13}\text{C}$ NMR (75 MHz,  $\text{CDCl}_3$ ):  $\delta$  169.86, 149.46, 142.66, 138.53, 129.57, 129.15, 126.99, 126.75, 126.07, 116.03, 111.95, 60.65, 51.72, 39.11, 34.89, 28.65, 19.34.

**HRMS (ESI):** C<sub>21</sub>H<sub>28</sub>N<sub>2</sub>O+Na<sup>+</sup> Calcd: 347.2094, Found: 347.2091.

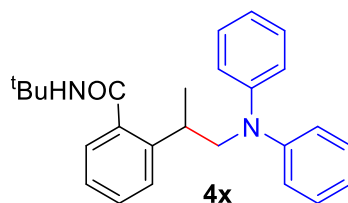

**N-(tert-butyl)-2-(1-(diphenylamino)propan-2-yl)benzamide (4x)**, 49.5 mg, yield: 64%. Yellow oil.

<sup>1</sup>HNMR (300 MHz, CDCl<sub>3</sub>): δ 7.18-7.30 (m, 7H), 6.92 (d, *J* = 6.9 Hz, 7H), 5.42 (s, 1H), 3.98-4.06 (m, 1H), 3.77-3.86 (m, 1H), 3.62 (q, *J* = 7.2 Hz, 1H), 1.35 (d, *J* = 6.9 Hz, 3H), 1.32 (s, 9H).

<sup>13</sup>CNMR (75 MHz, CDCl<sub>3</sub>): δ 169.74, 148.61, 142.46, 138.54, 129.50, 129.17, 127.16, 126.54, 126.08, 121.23, 59.30, 51.71, 34.98, 28.65, 20.00.

**HRMS (ESI):** C<sub>26</sub>H<sub>30</sub>N<sub>2</sub>O+Na<sup>+</sup> Calcd: 409.2250, Found: 409.2249.

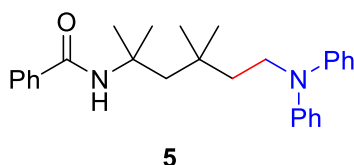

**N-(6-(diphenylamino)-2,4,4-trimethylhexan-2-yl)benzamide (5)**, 39.0 mg, yield: 47%. Colorless oil.

<sup>1</sup>HNMR (300 MHz, CDCl<sub>3</sub>): δ 7.63 (d, *J* = 7.2 Hz, 2H), 7.34-7.48 (m, 3H), 7.22 (d, *J* = 7.8 Hz, 4H), 6.94 (d, *J* = 8.1 Hz, 6H), 5.85 (s, 1H), 3.77 (t, *J* = 8.4 Hz, 2H), 1.93 (s, 2H), 1.73 (t, *J* = 8.4 Hz, 2H), 1.49 (s, 6H), 1.10 (s, 6H).

<sup>13</sup>CNMR (75 MHz, CDCl<sub>3</sub>): δ 166.74, 147.88, 136.08, 131.03, 129.25, 128.55, 126.58, 121.02, 120.78, 55.37, 49.63, 48.04, 40.93, 33.86, 29.61, 28.25.

**HRMS (ESI):** C<sub>28</sub>H<sub>34</sub>N<sub>2</sub>O+Na<sup>+</sup> Calcd: 437.2563, Found: 437.2554.

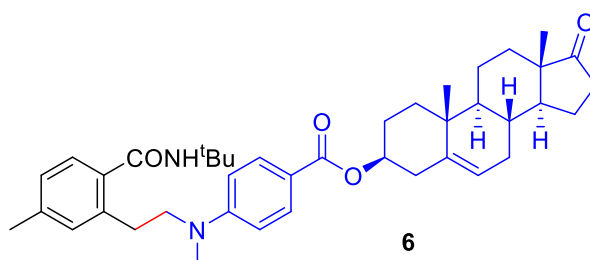

**(3R,8R,9S,10R,13S,14S)-10,13-dimethyl-17-oxo-2,3,4,7,8,9,10,11,12,13,14,15,16,17-tetradecahydro-1H-cyclopenta[a]phenanthren-3-yl 4-((2-(tert-butylcarbamoyl)-5-methylphenethyl)(methyl)amino)benzoate (6)**, 71.6 mg, yield: 56%. Yellow oil.

<sup>1</sup>HNMR (300 MHz, CDCl<sub>3</sub>): δ 7.87 (d, *J* = 8.7 Hz, 2H), 7.22 (d, *J* = 7.5 Hz, 1H), 7.00-7.04 (m, 2H), 6.73 (d, *J* = 8.7 Hz, 2H), 5.62 (s, 1H), 5.34 (s, 1H), 5.21 (s, 1H), 3.68 (t, *J* = 7.2 Hz, 2H), 2.92-2.99 (m, 5H), 2.39-2.60 (m, 3H), 2.33 (s, 3H), 1.52-2.15 (m, 12H), 1.46 (s, 9H), 1.15-1.36 (m, 4H), 1.09 (s, 3H), 0.91 (s, 3H).

<sup>13</sup>CNMR (75 MHz, CDCl<sub>3</sub>): δ 169.68, 166.37, 152.02, 139.85, 139.12, 137.17, 135.20, 131.68, 131.35, 127.03, 126.68, 121.25, 117.53, 110.58, 69.72, 54.23, 51.86, 51.76, 50.45, 47.57, 38.28, 37.25, 36.72, 35.87, 34.01, 31.50, 30.90, 30.85, 29.70, 28.88, 26.45, 21.88, 21.20, 20.12, 19.02, 13.56.

**HRMS (ESI):** C<sub>41</sub>H<sub>54</sub>N<sub>2</sub>O<sub>4</sub>+Na<sup>+</sup> Calcd: 661.3976, Found: 661.3984.

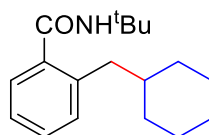

**8a**

***N*-(tert-butyl)-2-(cyclohexylmethyl)benzamide (8a)**, 38.8 mg, yield: 71%. Pale yellow solid, mp: 85-88°C.

<sup>1</sup>HNMR (300 MHz, CDCl<sub>3</sub>) δ 7.25-7.31 (m, 2H), 7.17 (t, *J* = 6.9 Hz, 2H), 5.55 (s, 1H), 2.68 (d, *J* = 6.8 Hz, 2H), 1.65 (d, *J* = 10.8 Hz, 6H), 1.46 (s, 9H), 1.13-1.61 (m, 3H), 0.80-1.10 (m, 2H).

<sup>13</sup>CNMR (75 MHz, CDCl<sub>3</sub>) δ 169.92, 138.89, 138.15, 130.91, 128.98, 126.64, 125.63, 51.70, 40.85, 39.59, 33.31, 28.81, 26.53, 26.36.

**HRMS (ESI):** C<sub>18</sub>H<sub>27</sub>NO+Na<sup>+</sup> Calcd: 296.1985, Found: 296.198

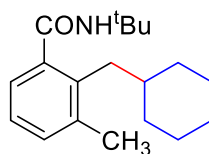

**8b**

***N*-(tert-butyl)-2-(cyclohexylmethyl)-3-methylbenzamide (8b)**, 32.1 mg, yield: 56%. Pale yellow solid, mp: 101-110°C.

<sup>1</sup>HNMR (300 MHz, CDCl<sub>3</sub>) δ 7.03-7.17 (m, 3H), 5.52 (s, 1H), 2.75 (d, *J* = 6.9 Hz, 2H), 2.32 (s, 3H), 1.54-1.65 (m, 6H), 1.46 (s, 9H), 0.88-1.06 (m, 5H).

<sup>13</sup>CNMR (75 MHz, CDCl<sub>3</sub>) δ 170.57, 138.90, 137.80, 137.49, 131.27, 125.36, 124.53, 51.61, 39.38, 36.52, 33.54, 28.79, 26.56, 26.51, 20.41.

**HRMS (ESI):** C<sub>19</sub>H<sub>29</sub>NO+Na<sup>+</sup> Calcd: 310.2141, Found: 310.2148.

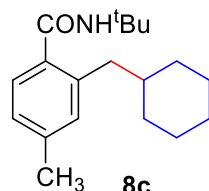

**8c**

***N*-(tert-butyl)-2-(cyclohexylmethyl)-4-methylbenzamide (8c)**, 36.6 mg, yield: 63%. Pale yellow solid, mp: 119-121°C.

<sup>1</sup>HNMR (300 MHz, CDCl<sub>3</sub>) δ 7.20 (d, *J* = 8.1 Hz, 1H), 6.97 (d, *J* = 6.9 Hz, 2H), 5.53 (s, 1H), 2.64 (d, *J* = 7.2 Hz, 2H), 2.32 (s, 3H), 1.66 (d, *J* = 9.6 Hz, 6H), 1.45 (s, 9H), 1.13-1.26 (m, 3H), 0.88-0.99 (m, 2H).

$^{13}\text{C}$ NMR (75 MHz,  $\text{CDCl}_3$ )  $\delta$  170.05, 138.96, 138.85, 135.38, 131.62, 126.69, 126.22, 51.59, 40.81, 39.63, 33.35, 28.82, 26.55, 26.38, 21.30.

HRMS (ESI):  $\text{C}_{19}\text{H}_{29}\text{NO}+\text{Na}^+$  Calcd: 310.2141, Found: 310.2142.

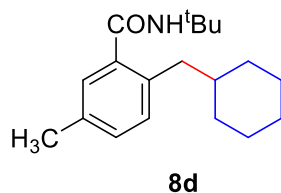

*N*-(tert-butyl)-2-(cyclohexylmethyl)-5-methylbenzamide (**8d**), 38.5 mg, yield: 67%. Pale yellow solid, mp: 106-109°C.

$^1\text{H}$ NMR (300 MHz,  $\text{CDCl}_3$ )  $\delta$  7.02-7.11 (m, 3H), 5.52 (s, 1H), 2.62 (d,  $J$  = 7.2 Hz, 2H), 2.31 (s, 3H), 1.65 (d,  $J$  = 12.6 Hz, 6H), 1.45 (s, 9H), 1.11-1.16 (m, 3H), 0.80-1.05 (m, 2H).

$^{13}\text{C}$ NMR (75 MHz,  $\text{CDCl}_3$ )  $\delta$  170.05, 138.06, 135.64, 135.21, 130.82, 129.64, 127.27, 51.64, 40.45, 39.63, 33.32, 28.81, 26.55, 26.36, 20.82.

HRMS (ESI):  $\text{C}_{19}\text{H}_{29}\text{NO}+\text{Na}^+$  Calcd: 310.2141, Found: 310.2140.

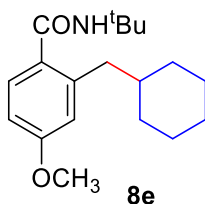

*N*-(tert-butyl)-2-(cyclohexylmethyl)-4-methoxybenzamide (**8e**), 33.4 mg, yield: 55%. Pale yellow solid, mp: 76-79°C.

$^1\text{H}$ NMR (300 MHz,  $\text{CDCl}_3$ )  $\delta$  7.27 (s, 1H), 6.69 (t,  $J$  = 3 Hz, 2H), 5.52 (s, 1H), 3.80 (s, 3H), 2.67 (d,  $J$  = 6.9 Hz, 2H), 1.66 (d,  $J$  = 11.4 Hz, 6H), 1.45 (s, 9H), 1.08-1.30 (m, 3H), 0.81-1.06 (m, 2H).

$^{13}\text{C}$ NMR (75 MHz,  $\text{CDCl}_3$ )  $\delta$  169.74, 159.87, 141.28, 130.91, 128.27, 116.52, 110.41, 55.24, 51.55, 41.08, 39.57, 33.30, 28.82, 26.52, 26.36.

HRMS (ESI):  $\text{C}_{19}\text{H}_{29}\text{NO}_2+\text{Na}^+$  Calcd: 326.2091, Found: 326.2095.

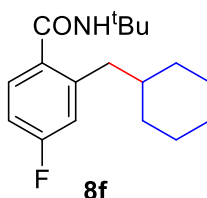

*N*-(tert-butyl)-2-(cyclohexylmethyl)-4-fluorobenzamide (**8f**), 42.5 mg, yield: 73%. Pale yellow solid, mp: 85-88°C.

$^1\text{H}$ NMR (300 MHz,  $\text{CDCl}_3$ )  $\delta$  7.25-7.31 (m, 1H), 6.86 (d,  $J$  = 9.3 Hz, 2H), 5.53 (s, 1H), 2.66 (d,  $J$  = 6.9 Hz, 2H), 1.67-1.71 (m, 6H), 1.45 (s, 9H), 1.13-1.26 (m, 3H), 0.88-0.99 (m, 2H).

$^{19}\text{F}$ NMR (282 MHz)  $\delta$  -112.10.

$^{13}\text{C}$ NMR (75 MHz,  $\text{CDCl}_3$ )  $\delta$  169.06, 164.37, 161.08, 142.18 (d,  $J$  = 7.5 Hz), 134.32 (d,  $J$  = 3.0 Hz),



128.55 (d,  $J = 8.3$  Hz), 117.44 (d,  $J = 21.0$  Hz), 112.44 (d,  $J = 21.8$  Hz), 51.79, 40.80, 39.44, 33.22, 28.78, 26.43, 26.28.

**HRMS (ESI):**  $C_{18}H_{26}FNO+Na^+$  Calcd: 314.1891, Found: 314.1887.

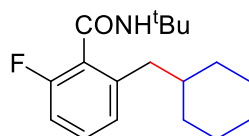

**8g**

***N*-(tert-butyl)-2-(cyclohexylmethyl)-6-fluorobenzamide (8g)**, 40.2 mg, yield: 69%. Pale yellow solid, mp: 70-73°C.

**$^1H$ NMR** (300 MHz,  $CDCl_3$ )  $\delta$  7.17-7.23 (m, 1H), 6.86-6.95 (m, 2H), 5.55 (s, 1H), 2.59 (d,  $J = 6.9$  Hz, 2H), 1.60-1.75 (m, 6H), 1.47 (s, 9H), 1.14-1.26 (m, 3H), 0.83-0.93 (m, 2H).

**$^{19}F$ NMR** (282 MHz)  $\delta$  -117.37.

**$^{13}C$ NMR** (75 MHz,  $CDCl_3$ )  $\delta$  164.48, 141.46, 129.62, 129.51, 126.03, 113.04, 112.75, 52.12, 40.66, 39.33, 33.28, 28.78, 26.49, 26.30.

**HRMS (ESI):**  $C_{18}H_{26}FNO+Na^+$  Calcd: 314.1891, Found: 314.1896.

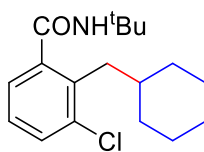

**8h**

***N*-(tert-butyl)-3-chloro-2-(cyclohexylmethyl)benzamide (8h)**, 39.9 mg, yield: 65%. Pale yellow solid, mp: 115-118°C.

**$^1H$ NMR** (300 MHz,  $CDCl_3$ )  $\delta$  7.34-7.38 (m, 1H), 7.07-7.20 (m, 2H), 5.53 (s, 1H), 2.87 (d,  $J = 6.9$  Hz, 2H), 1.61-1.67 (m, 6H), 1.46 (s, 9H), 1.01-1.15 (m, 5H).

**$^{13}C$ NMR** (75 MHz,  $CDCl_3$ )  $\delta$  168.94, 140.33, 137.08, 135.79, 130.53, 126.71, 125.21, 51.93, 38.81, 37.05, 33.30, 28.75, 26.45.

**HRMS (ESI):**  $C_{18}H_{26}ClNO+Na^+$  Calcd: 330.1595, Found: 330.1598.

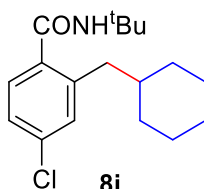

**8i**

***N*-(tert-butyl)-4-chloro-2-(cyclohexylmethyl)benzamide (8i)**, 40.2 mg, yield: 67%. Pale yellow solid, mp: 141-144°C.

**$^1H$ NMR** (300 MHz,  $CDCl_3$ )  $\delta$  7.22 (d,  $J = 8.7$  Hz, 1H), 7.14 (s, 2H), 5.54 (s, 1H), 2.64 (d,  $J = 7.2$  Hz, 2H), 1.60-1.70 (m, 6H), 1.45 (s, 9H), 1.10-1.21 (m, 3H), 0.92-1.17 (m, 2H).

**$^{13}C$ NMR** (75 MHz,  $CDCl_3$ )  $\delta$  168.91, 141.19, 136.49, 134.74, 130.71, 128.03, 125.75, 51.88, 40.65,

39.47, 33.23, 28.77, 26.43, 26.28.

**HRMS (ESI):** C<sub>18</sub>H<sub>26</sub>ClNO+Na<sup>+</sup> Calcd: 330.1595, Found: 330.1602.

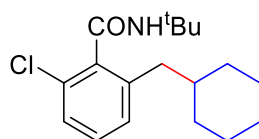

**8j**

***N*-(tert-butyl)-2-chloro-6-(cyclohexylmethyl)benzamide (8j)**, 36.3 mg, yield: 59%. Pale yellow solid, mp: 99-102°C.

**<sup>1</sup>HNMR** (300 MHz, CDCl<sub>3</sub>) δ 7.15-7.20 (m, 2H), 7.04-7.08 (m, 1H), 5.46 (s, 1H), 2.54 (d, *J* = 6.9 Hz, 2H), 1.60-1.75 (m, 6H), 1.48 (s, 9H), 1.07-1.31 (m, 3H), 0.88-0.99 (m, 2H).

**<sup>13</sup>CNMR** (75 MHz, CDCl<sub>3</sub>) δ 166.24, 140.37, 137.58, 130.62, 129.11, 128.58, 126.81, 52.16, 41.09, 39.34, 33.30, 28.73, 26.47, 26.28.

**HRMS (ESI):** C<sub>18</sub>H<sub>26</sub>ClNO+Na<sup>+</sup> Calcd: 330.1595, Found: 330.1599.

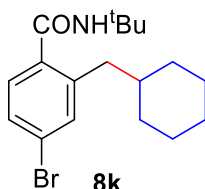

**8k**

**4-bromo-*N*-(tert-butyl)-2-(cyclohexylmethyl)benzamide (8k)**, 49.3 mg, yield: 70%. Pale yellow solid, mp: 130-133°C.

**<sup>1</sup>HNMR** (300 MHz, CDCl<sub>3</sub>) δ 7.26-7.36 (m, 2H), 7.16 (d, *J* = 8.7 Hz, 1H), 5.51 (s, 1H), 2.63 (d, *J* = 6.9 Hz, 2H), 1.52-1.67 (m, 6H), 1.45 (s, 9H), 1.13-1.35 (m, 3H), 0.89-0.99 (m, 2H).

**<sup>13</sup>CNMR** (75 MHz, CDCl<sub>3</sub>) δ 168.92, 141.41, 136.95, 133.63, 128.71, 128.21, 123.12, 51.89, 40.61, 39.50, 33.23, 28.77, 26.43, 26.28.

**HRMS (ESI):** C<sub>18</sub>H<sub>26</sub>BrNO+Na<sup>+</sup> Calcd: 374.1090, Found: 374.1092.

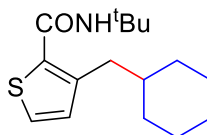

**8l**

***N*-(tert-butyl)-3-(cyclohexylmethyl)thiophene-2-carboxamide (8l)**, 40.2 mg, yield: 72%. Pale yellow solid, mp: 94-97°C.

**<sup>1</sup>HNMR** (300 MHz, CDCl<sub>3</sub>) δ 7.04 (s, 2H), 5.59 (s, 1H), 2.96 (d, *J* = 7.2 Hz, 2H), 1.55-1.76 (m, 6H), 1.44 (s, 9H), 1.11-1.28 (m, 3H), 0.93-1.05 (m, 2H).

**<sup>13</sup>CNMR** (75 MHz, CDCl<sub>3</sub>) δ 164.61, 146.90, 134.41, 126.53, 122.14, 51.52, 40.52, 36.05, 33.05, 28.93, 26.36, 26.19.

**HRMS (ESI):** C<sub>16</sub>H<sub>25</sub>NOS+Na<sup>+</sup> Calcd: 302.1549, Found: 302.1550.

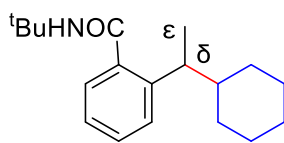

**8m**

*N*-(tert-butyl)-2-(1-cyclohexylethyl)benzamide (**8m**,  $\delta : \epsilon = 3 : 1$ ), 25.8 mg, yield: 45%. Pale yellow solid, mp: 78-81°C.

<sup>1</sup>HNMR (300 MHz, CDCl<sub>3</sub>)  $\delta$  7.26-7.36 (m, 3H), 7.12-7.24 (m, 1H), 5.53 (s, 1H), 2.74-2.93 (m, 1H), 1.60-1.70 (m, 4H), 1.46 (s, 9H), 1.06-1.39 (m, 8H), 0.82-0.99 (m, 2H).

<sup>13</sup>CNMR (75 MHz, CDCl<sub>3</sub>)  $\delta$  170.15, 144.90, 138.30, 129.30, 126.91, 126.17, 125.30, 51.77, 43.83, 41.00, 32.01, 30.49, 28.86, 26.49, 19.46.

HRMS (ESI): C<sub>19</sub>H<sub>29</sub>NO+Na<sup>+</sup> Calcd: 310.2141, Found: 310.2145.

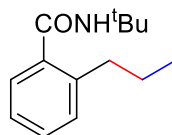

**9a**

*N*-(tert-butyl)-2-propylbenzamide (**9a**), 28.5 mg, yield: 65%. Pale yellow solid, mp: 84-87°C.

<sup>1</sup>HNMR (300 MHz, CDCl<sub>3</sub>)  $\delta$  7.26-7.33 (m, 2H), 7.15-7.23 (m, 2H), 5.55 (s, 1H), 2.74 (t,  $J = 7.8$  Hz, 2H), 1.60-1.69 (m, 2H), 1.46 (s, 9H), 0.96 (t,  $J = 7.2$  Hz, 3H).

<sup>13</sup>CNMR (75 MHz, CDCl<sub>3</sub>)  $\delta$  169.85, 140.21, 137.89, 130.01, 129.31, 126.57, 125.66, 51.73, 35.23, 28.81, 24.84, 14.17.

HRMS (ESI): C<sub>14</sub>H<sub>21</sub>NO+Na<sup>+</sup> Calcd: 242.1515, Found: 242.1517.

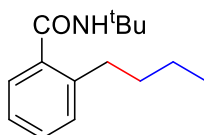

**9b**

*N*-(tert-butyl)-2-butylbenzamide (**9b**), 29.4 mg, yield: 63%. Yellow solid, mp: 83-85°C.

<sup>1</sup>HNMR (300 MHz, CDCl<sub>3</sub>)  $\delta$  7.26-7.33 (m, 2H), 7.14-7.23 (m, 2H), 5.55 (s, 1H), 2.76 (t,  $J = 7.8$  Hz, 2H), 1.54-1.65 (m, 2H), 1.46 (s, 9H), 1.31-1.42 (m, 2H), 0.95 (t,  $J = 7.2$  Hz, 3H).

<sup>13</sup>CNMR (75 MHz, CDCl<sub>3</sub>)  $\delta$  169.84, 140.44, 137.82, 129.97, 129.33, 126.58, 125.61, 51.71, 33.91, 32.95, 28.81, 22.79, 13.96.

HRMS (ESI): C<sub>15</sub>H<sub>23</sub>NO+Na<sup>+</sup> Calcd: 256.1672, Found: 256.1677.

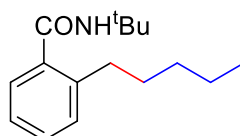

**9c**

*N*-(tert-butyl)-2-pentylbenzamide (**9c**), 32.6 mg, yield: 66%. Yellow solid, mp: 73-76°C.

**<sup>1</sup>HNMR** (300 MHz, CDCl<sub>3</sub>) δ 7.26-7.33 (m, 2H), 7.14-7.23 (m, 2H), 5.55 (s, 1H), 2.76 (t, *J* = 7.5 Hz, 2H), 1.58-1.64 (m, 2H), 1.46 (s, 9H), 1.33-1.35 (m, 4H), 0.89 (t, *J* = 6.9 Hz, 3H).  
**<sup>13</sup>CNMR** (75 MHz, CDCl<sub>3</sub>) δ 169.84, 140.49, 137.80, 129.97, 129.34, 126.58, 125.62, 51.72, 33.20, 31.93, 31.46, 28.81, 22.55, 14.05.

**HRMS (ESI):** C<sub>16</sub>H<sub>25</sub>NO+Na<sup>+</sup> Calcd: 270.1828, Found: 270.1831.

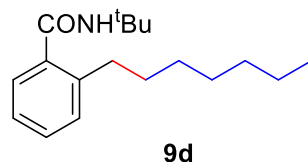

***N*-(tert-butyl)-2-heptylbenzamide (9d)**, 35.8 mg, yield: 65%. Yellow solid, mp: 39-42°C.

**<sup>1</sup>HNMR** (300 MHz, CDCl<sub>3</sub>) δ 7.26-7.32 (m, 2H), 7.17-7.23 (m, 2H), 5.55 (s, 1H), 2.76 (t, *J* = 7.5 Hz, 2H), 1.61 (s, 2H), 1.46 (s, 9H), 1.18-1.40 (m, 8H), 0.85 (t, *J* = 6.9 Hz, 3H).

**<sup>13</sup>CNMR** (75 MHz, CDCl<sub>3</sub>) δ 169.84, 140.48, 137.81, 129.96, 129.33, 126.58, 125.61, 51.72, 33.26, 31.83, 31.79, 29.72, 29.19, 28.81, 22.66, 14.09.

**HRMS (ESI):** C<sub>18</sub>H<sub>29</sub>NO+Na<sup>+</sup> Calcd: 298.2141, Found: 298.2146.

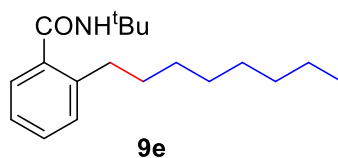

***N*-(tert-butyl)-2-octylbenzamide (9e)**, 39.9 mg, yield: 69%. Yellow oil.

**<sup>1</sup>HNMR** (300 MHz, CDCl<sub>3</sub>) δ 7.26-7.32 (m, 2H), 7.14-7.22 (m, 2H), 5.54 (s, 1H), 2.75 (t, *J* = 7.5 Hz, 2H), 1.56-1.59 (m, 2H), 1.46 (s, 9H), 1.28 (s, 10H), 0.87 (t, *J* = 6.0 Hz, 3H).

**<sup>13</sup>CNMR** (75 MHz, CDCl<sub>3</sub>) δ 169.84, 140.49, 137.80, 129.97, 129.33, 126.58, 125.61, 51.72, 33.27, 31.88, 31.79, 29.77, 29.49, 29.28, 28.82, 22.67, 14.11.

**HRMS (ESI):** C<sub>19</sub>H<sub>23</sub>NO+Na<sup>+</sup> Calcd: 312.2298, Found: 312.2298.

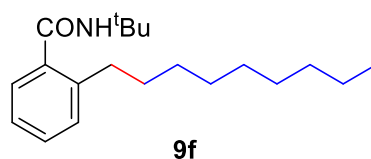

***N*-(tert-butyl)-2-nonylbenzamide (9f)**, 38.8 mg, yield: 64%. Yellow solid, mp: 35-38°C.

**<sup>1</sup>HNMR** (300 MHz, CDCl<sub>3</sub>) δ 7.26-7.32 (m, 2H), 7.14-7.22 (m, 2H), 5.55 (s, 1H), 2.75 (t, *J* = 8.1 Hz, 2H), 1.57-1.63 (m, 2H), 1.46 (s, 9H), 1.21-1.31 (m, 12H), 0.87 (t, *J* = 6 Hz, 3H).

**<sup>13</sup>CNMR** (75 MHz, CDCl<sub>3</sub>) δ 169.84, 140.49, 137.80, 129.96, 129.33, 126.58, 125.61, 51.72, 33.26, 31.89, 31.79, 29.76, 29.57, 29.53, 29.32, 28.82, 22.67, 14.11.

**HRMS (ESI):** C<sub>20</sub>H<sub>33</sub>NO+Na<sup>+</sup> Calcd: 326.2454, Found: 326.2452.

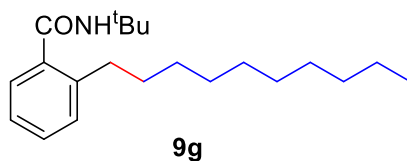

***N*-(tert-butyl)-2-decylbenzamide (9g)**, 38.7 mg, yield: 61%. Yellow solid, mp: 46-49°C.

<sup>1</sup>HNMR (300 MHz, CDCl<sub>3</sub>) δ 7.26-7.32 (m, 2H), 7.14-7.22 (m, 2H), 5.54 (s, 1H), 2.75 (t, *J* = 7.8 Hz, 2H), 1.57-1.63 (m, 2H), 1.46 (s, 9H), 1.28 (s, 14H), 0.88 (t, *J* = 6.0 Hz, 3H).

<sup>13</sup>CNMR (75 MHz, CDCl<sub>3</sub>) δ 169.83, 140.49, 137.81, 129.96, 129.33, 126.58, 125.61, 51.72, 33.26, 31.90, 31.79, 29.77, 29.62, 29.53, 29.33, 28.82, 22.68, 14.12.

**HRMS (ESI):** C<sub>21</sub>H<sub>35</sub>NO+Na<sup>+</sup> Calcd: 340.2611, Found: 340.2610.

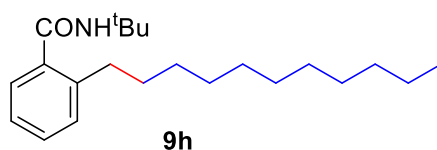

***N*-(tert-butyl)-2-undecylbenzamide (9h)**, 39.1 mg, yield: 59%. Yellow solid, mp: 47-50°C.

<sup>1</sup>HNMR (300 MHz, CDCl<sub>3</sub>) δ 7.26-7.32 (m, 2H), 7.14-7.22 (m, 2H), 5.55 (s, 1H), 2.75 (t, *J* = 7.8 Hz, 2H), 1.56-1.65 (m, 2H), 1.46 (s, 9H), 1.28 (s, 16H), 0.88 (t, *J* = 6.0 Hz, 3H).

<sup>13</sup>CNMR (75 MHz, CDCl<sub>3</sub>) δ 169.84, 140.49, 137.80, 129.96, 129.33, 126.57, 125.60, 51.72, 33.26, 31.92, 31.80, 29.77, 29.67, 29.62, 29.53, 29.35, 28.82, 22.69, 14.13.

**HRMS (ESI):** C<sub>22</sub>H<sub>37</sub>NO+Na<sup>+</sup> Calcd: 354.2767, Found: 354.2764.

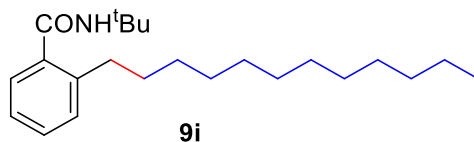

***N*-(tert-butyl)-2-dodecylbenzamide (9i)**, 44.9 mg, yield: 65%. Yellow solid, mp: 40-43°C.

<sup>1</sup>HNMR (300 MHz, CDCl<sub>3</sub>) δ 7.26-7.32 (m, 2H), 7.14-7.22 (m, 2H), 5.54 (s, 1H), 2.75 (t, *J* = 7.8 Hz, 2H), 1.58 (s, 2H), 1.46 (s, 9H), 1.25-1.32 (m, 18H), 0.87 (t, *J* = 6.0 Hz, 3H).

<sup>13</sup>CNMR (75 MHz, CDCl<sub>3</sub>) δ 169.83, 140.49, 137.81, 129.96, 129.33, 126.57, 125.60, 53.42, 51.72, 33.26, 31.92, 31.79, 29.77, 29.67, 29.62, 29.53, 29.36, 28.82, 22.69, 14.12.

**HRMS (ESI):** C<sub>23</sub>H<sub>39</sub>NO+Na<sup>+</sup> Calcd: 368.2924, Found: 368.2926.

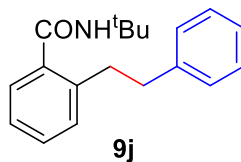

***N*-(tert-butyl)-2-phenethylbenzamide (9j)**, 40.5 mg, yield: 72%. Pale yellow solid, mp: 97-100°C.

<sup>1</sup>HNMR (300 MHz, CDCl<sub>3</sub>) δ 7.16-7.32 (m, 9H), 5.48 (s, 1H), 3.07 (t, *J* = 7.2 Hz, 2H), 2.92 (t, *J* = 8.7 Hz, 2H), 1.45 (s, 9H).

<sup>13</sup>CNMR (75 MHz, CDCl<sub>3</sub>) δ 169.72, 141.81, 139.44, 137.95, 130.21, 129.45, 128.55, 128.31, 126.58, 125.96, 125.88, 51.70, 38.08, 35.47, 28.78.

**HRMS (ESI):** C<sub>19</sub>H<sub>23</sub>NO+Na<sup>+</sup> Calcd: 304.1672, Found: 304.1677.

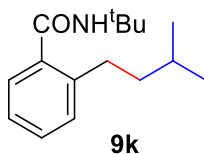

**N-(tert-butyl)-2-isopentylbenzamide (9k)**, 33.6 mg, yield: 68%. Pale yellow solid, mp: 84-87°C.

<sup>1</sup>HNMR (300 MHz, CDCl<sub>3</sub>) δ 7.26-7.32 (m, 2H), 7.19 (t, *J* = 8.4 Hz, 2H), 5.55 (s, 1H), 2.73-2.79 (m, 2H), 1.59 (s, 1H), 1.46 (s, 9H), 1.27 (s, 2H), 0.93 (d, *J* = 6.6 Hz, 6H).

<sup>13</sup>CNMR (75 MHz, CDCl<sub>3</sub>) δ 169.81, 140.66, 137.82, 129.92, 129.36, 126.59, 125.58, 51.72, 41.07, 31.18, 28.82, 28.27, 22.52, 14.11.

**HRMS (ESI):** C<sub>16</sub>H<sub>25</sub>NO+Na<sup>+</sup> Calcd: 270.1828, Found: 270.1827.

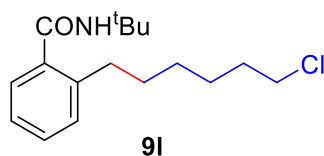

**N-(tert-butyl)-2-(6-chlorohexyl)benzamide (9l)**, 27.8 mg, yield: 47%. Yellow oil.

<sup>1</sup>HNMR (300 MHz, CDCl<sub>3</sub>) δ 7.26-7.33 (m, 2H), 7.15-7.22 (m, 2H), 5.55 (s, 1H), 3.52 (t, *J* = 6.6 Hz, 2H), 2.77 (t, *J* = 7.8 Hz, 2H), 1.73-1.81 (m, 2H), 1.64-1.69 (m, 2H), 1.57-1.63 (m, 13H).

<sup>13</sup>CNMR (75 MHz, CDCl<sub>3</sub>) δ 169.77, 140.28, 137.76, 129.97, 129.39, 126.59, 125.72, 51.73, 45.09, 33.12, 32.53, 31.47, 28.88, 28.82, 26.71.

**HRMS (ESI):** C<sub>17</sub>H<sub>26</sub>ClNO+Na<sup>+</sup> Calcd: 318.1595, Found: 318.1598.

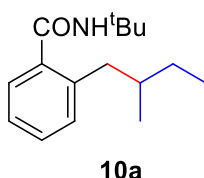

**N-(tert-butyl)-2-(2-methylbutyl)benzamide (10a)**, 34.6 mg, yield: 70%. Yellow solid, mp: 60-63°C.

<sup>1</sup>HNMR (300 MHz, CDCl<sub>3</sub>) δ 7.29 (d, *J* = 7.8 Hz, 2H), 7.10-7.19 (m, 2H), 5.55 (s, 1H), 2.83-2.90 (m, 1H), 2.38-2.60 (m, 1H), 1.55-1.74 (m, 1H), 1.42 (s, 9H), 1.35-1.40 (m, 1H), 1.12-1.25 (m, 1H), 0.81-0.92 (m, 6H).

<sup>13</sup>CNMR (75 MHz, CDCl<sub>3</sub>) δ 169.91, 139.35, 138.20, 130.88, 129.04, 126.65, 125.62, 51.70, 40.24, 36.45, 29.54, 28.89, 28.81, 18.96, 11.51.

**HRMS (ESI):** C<sub>16</sub>H<sub>25</sub>NO+Na<sup>+</sup> Calcd: 270.1828, Found: 270.1831.

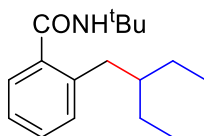

**10b**

*N*-(*tert*-butyl)-2-(2-ethylbutyl)benzamide (**10b**), 39.2 mg, yield: 75%. Pale yellow solid, mp: 60-63°C.

<sup>1</sup>HNMR (300 MHz, CDCl<sub>3</sub>) δ 7.26-7.29 (m, 2H), 7.16 (d, *J* = 7.5 Hz, 2H), 5.55 (s, 1H), 2.73 (d, *J* = 7.2 Hz, 2H), 1.51-1.62 (m, 1H), 1.45 (s, 9H), 1.24-1.34 (m, 4H), 0.84 (t, *J* = 8.4 Hz, 6H).

<sup>13</sup>CNMR (75 MHz, CDCl<sub>3</sub>) δ 169.90, 139.62, 138.26, 130.86, 129.09, 126.69, 125.54, 51.69, 41.96, 36.95, 28.82, 25.00, 10.72.

HRMS (ESI): C<sub>17</sub>H<sub>27</sub>NO+Na<sup>+</sup> Calcd: 284.1985, Found: 284.1986.

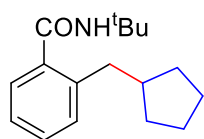

**10c**

*N*-(*tert*-butyl)-2-(cyclopentylmethyl)benzamide (**10c**), 34.7 mg, yield: 67%. Pale yellow solid, mp: 63-66°C.

<sup>1</sup>HNMR (300 MHz, CDCl<sub>3</sub>) δ 7.26-7.30 (m, 2H), 7.14-7.23 (m, 2H), 5.56 (s, 1H), 2.79 (d, *J* = 7.5 Hz, 2H), 2.04-2.20 (m, 1H), 1.61-1.74 (m, 6H), 1.56 (s, 9H), 1.15-1.53 (m, 2H).

<sup>13</sup>CNMR (75 MHz, CDCl<sub>3</sub>) δ 169.93, 139.86, 137.96, 130.38, 129.15, 126.58, 125.59, 51.71, 41.84, 38.80, 32.57, 28.81, 24.86.

HRMS (ESI): C<sub>17</sub>H<sub>25</sub>NO+Na<sup>+</sup> Calcd: 282.1828, Found: 282.1829.

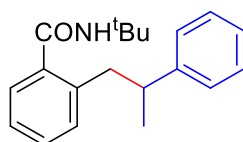

**10d**

*N*-(*tert*-butyl)-2-(2-phenylpropyl)benzamide (**10d**), 43.7 mg, yield: 74%. Pale yellow solid, mp: 57-60°C.

<sup>1</sup>HNMR (300 MHz, CDCl<sub>3</sub>) δ 7.11-7.35 (m, 8H), 7.03 (d, *J* = 7.8 Hz, 1H), 5.46 (s, 1H), 2.97-3.14 (m, 3H), 1.45 (s, 9H), 1.25 (d, *J* = 6.3 Hz, 3H).

<sup>13</sup>CNMR (75 MHz, CDCl<sub>3</sub>) δ 169.91, 146.84, 138.51, 138.19, 130.90, 129.08, 128.25, 127.12, 126.60, 125.97, 125.86, 51.71, 42.05, 41.40, 28.81, 21.17.

HRMS (ESI): C<sub>20</sub>H<sub>25</sub>NO+Na<sup>+</sup> Calcd: 318.1828, Found: 318.1829.

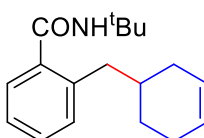

**10e**

*N*-(*tert*-butyl)-2-(cyclohex-3-en-1-ylmethyl)benzamide (**10e**), 36.9 mg, yield: 68%. Pale yellow solid, mp: 80-83°C.

<sup>1</sup>HNMR (300 MHz, CDCl<sub>3</sub>) δ 7.26-7.32 (m, 2H), 7.19 (d, *J* = 7.2 Hz, 2H), 5.50-5.67 (m, 3H), 2.76 (d, *J* = 6.9 Hz, 2H), 1.96-2.03 (m, 4H), 1.71-1.76 (m, 2H), 1.45 (s, 9H), 1.20-1.34 (m, 1H).

<sup>13</sup>CNMR (75 MHz, CDCl<sub>3</sub>) δ 169.86, 138.67, 138.20, 130.80, 129.08, 126.92, 126.66, 126.34, 125.77, 51.73, 39.81, 35.41, 31.78, 28.79, 28.65, 25.21.

HRMS (ESI): C<sub>18</sub>H<sub>25</sub>NO+Na<sup>+</sup> Calcd: 294.1828, Found: 294.1829.

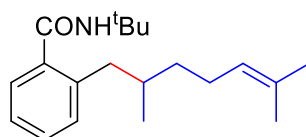

**10f**

*N*-(*tert*-butyl)-2-(2,6-dimethylhept-5-en-1-yl)benzamide (**10f**), 43.3 mg, yield: 72%. Yellow oil.

<sup>1</sup>HNMR (300 MHz, CDCl<sub>3</sub>) δ 7.26-7.31 (m, 2H), 7.15-7.20 (m, 2H), 5.54 (s, 1H), 5.07 (t, *J* = 7.2 Hz, 1H), 2.82-2.89 (m, 1H), 2.52-2.60 (m, 1H), 1.87-2.11 (m, 2H), 1.75-1.83 (m, 1H), 1.71 (s, 3H), 1.67 (s, 3H), 1.45 (s, 9H), 1.24-1.39 (m, 1H), 1.11-1.23 (m, 1H), 0.84 (d, *J* = 6.6 Hz, 3H).

<sup>13</sup>CNMR (75 MHz, CDCl<sub>3</sub>) δ 169.91, 139.23, 138.21, 131.11, 130.86, 129.07, 126.63, 125.64, 124.78, 51.69, 40.54, 37.14, 34.54, 28.80, 25.74, 25.64, 19.33, 17.65.

HRMS (ESI): C<sub>20</sub>H<sub>31</sub>NO+Na<sup>+</sup> Calcd: 324.2298, Found: 324.2298.

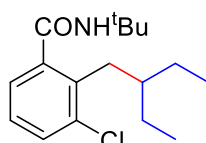

**10g**

*N*-(*tert*-butyl)-3-chloro-2-(2-ethylbutyl)benzamide (**10g**), 42.0 mg, yield: 71%. Yellow solid, mp: 81-84°C.

<sup>1</sup>HNMR (300 MHz, CDCl<sub>3</sub>) δ 7.35-7.38 (m, 1H), 7.19 (d, *J* = 6.6 Hz, 1H), 7.11 (t, *J* = 7.5 Hz, 1H), 5.52 (s, 1H), 2.93 (d, *J* = 7.5 Hz, 2H), 1.62-1.69 (m, 1H), 1.45 (s, 9H), 1.17-1.40 (m, 4H), 0.85 (t, *J* = 7.5 Hz, 6H).

<sup>13</sup>CNMR (75 MHz, CDCl<sub>3</sub>) δ 168.92, 140.47, 137.73, 135.91, 130.64, 126.71, 125.33, 51.93, 41.05, 34.08, 28.78, 25.25, 10.96.

HRMS (ESI): C<sub>17</sub>H<sub>26</sub>ClNO+Na<sup>+</sup> Calcd: 318.1595, Found: 318.1601.

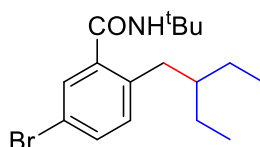

**10h**

5-bromo-*N*-(*tert*-butyl)-2-(2-ethylbutyl)benzamide (**10h**), 46.9 mg, yield: 69%. Pale yellow solid, mp: 73-76°C.

<sup>1</sup>HNMR (300 MHz, CDCl<sub>3</sub>) δ 7.40 (s, 2H), 7.05 (d, *J* = 7.8 Hz, 1H), 5.54 (s, 1H), 2.66 (d, *J* = 7.2



Hz, 2H), 1.50-1.69 (m, 1H), 1.45 (s, 9H), 1.22-1.31 (m, 4H), 0.83 (t,  $J = 7.2$  Hz, 6H).  
 $^{13}\text{C}$ NMR (75 MHz,  $\text{CDCl}_3$ )  $\delta$  168.16, 139.92, 138.71, 132.59, 131.99, 129.55, 119.03, 51.97, 41.90, 36.48, 28.76, 24.97, 10.68.

**HRMS (ESI):**  $\text{C}_{17}\text{H}_{26}\text{BrNO} + \text{Na}^+$  Calcd: 362.1090, Found: 362.1096.

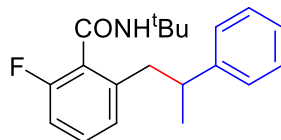

**10i**

***N*-(tert-butyl)-2-fluoro-6-(2-phenylpropyl)benzamide (10i)**, 45.7 mg, yield: 73%. Yellow solid, mp: 93-96°C.

$^1\text{H}$ NMR (300 MHz,  $\text{CDCl}_3$ )  $\delta$  7.11-7.28 (m, 6H), 6.80-6.90 (m, 2H), 5.43 (s, 1H), 3.06-3.17 (m, 1H), 2.88-3.02 (m, 2H), 1.46 (s, 9H), 1.27 (d,  $J = 6.9$  Hz, 3H).

$^{19}\text{F}$ NMR (282 MHz)  $\delta$  -117.220.

$^{13}\text{C}$ NMR (75 MHz,  $\text{CDCl}_3$ )  $\delta$  164.43, 160.58, 157.32, 146.44, 140.92 ( $d$ ,  $J = 3$  Hz), 129.65 ( $d$ ,  $J = 8.3$  Hz), 128.29, 127.07, 126.11, 126.03 ( $d$ ,  $J = 3$  Hz), 113.15 ( $d$ ,  $J = 22$  Hz), 52.13, 41.91, 41.17, 28.76, 21.13.

**HRMS (ESI):**  $\text{C}_{20}\text{H}_{24}\text{FNO} + \text{Na}^+$  Calcd: 336.1734, Found: 336.1741.

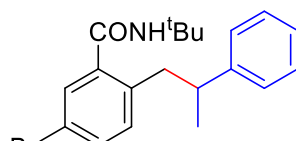

**10j**

**5-bromo-*N*-(tert-butyl)-2-(2-phenylpropyl)benzamide (10j)**, 48.6 mg, yield: 65%. Pale yellow solid, mp: 90-93°C.

$^1\text{H}$ NMR (300 MHz,  $\text{CDCl}_3$ )  $\delta$  7.10-7.37 (m, 7H), 6.86 (d,  $J = 8.1$  Hz, 1H), 5.43 (s, 1H), 2.95-3.07 (m, 3H), 1.44 (s, 9H), 1.25 (d,  $J = 6.6$  Hz, 3H).

$^{13}\text{C}$ NMR (75 MHz,  $\text{CDCl}_3$ )  $\delta$  167.92, 146.06, 139.64, 137.34, 132.34, 131.75, 129.22, 128.10, 126.86, 125.90, 119.15, 51.74, 41.28, 41.07, 28.51, 21.05.

**HRMS (ESI):**  $\text{C}_{20}\text{H}_{24}\text{BrNO} + \text{Na}^+$  Calcd: 396.0933, Found: 396.0942.

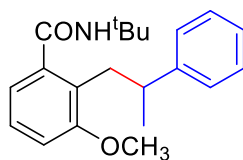

**10k**

***N*-(tert-butyl)-3-methoxy-2-(2-phenylpropyl)benzamide (10k)**, 36.4 mg, yield: 56%. Pale yellow solid, mp: 58-61°C.

$^1\text{H}$ NMR (300 MHz,  $\text{CDCl}_3$ )  $\delta$  7.11-7.23 (m, 6H), 6.84 (d,  $J = 7.8$  Hz, 2H), 5.28 (s, 1H), 3.76 (s, 3H), 2.97-3.22 (m, 3H), 1.42 (s, 9H), 1.23 (d,  $J = 6.9$  Hz, 3H).

$^{13}\text{C}$ NMR (75 MHz,  $\text{CDCl}_3$ )  $\delta$  169.70, 158.14, 147.59, 140.02, 128.00, 127.32, 127.16, 126.89, 125.70, 118.79, 111.23, 55.46, 51.61, 39.72, 35.57, 28.74, 20.61.

**HRMS (ESI):** C<sub>21</sub>H<sub>27</sub>NO<sub>2</sub>+Na<sup>+</sup> Calcd: 348.1934, Found: 348.1942.

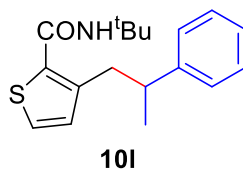

***N*-(tert-butyl)-3-(2-phenylpropyl)thiophene-2-carboxamide (10l)**, 44.5 mg, yield: 74%. Pale yellow solid, mp: 86-89°C.

**<sup>1</sup>HNMR** (300 MHz, CDCl<sub>3</sub>) δ 7.17-7.29 (m, 5H), 6.94-7.00 (m, 2H), 5.48 (s, 1H), 3.31-3.45 (m, 2H), 3.07-3.18 (m, 1H), 1.43 (s, 9H), 1.32 (d, *J* = 6.9 Hz, 3H).

**<sup>13</sup>CNMR** (75 MHz, CDCl<sub>3</sub>) δ 164.50, 146.74, 146.07, 134.28, 128.35, 127.13, 126.19, 126.08, 122.50, 51.51, 42.33, 37.01, 28.94, 21.69.

**HRMS (ESI):** C<sub>18</sub>H<sub>23</sub>NOS+Na<sup>+</sup> Calcd: 324.1393, Found: 324.1399.

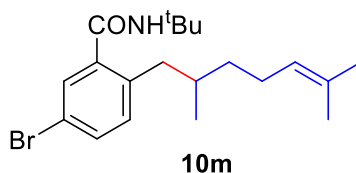

**5-bromo-*N*-(tert-butyl)-2-(2,6-dimethylhept-5-en-1-yl)benzamide (10m)**, 53.3 mg, yield: 70%. Yellow oil liquid.

**<sup>1</sup>HNMR** (300 MHz, CDCl<sub>3</sub>) δ 7.40 (d, *J* = 6.3 Hz, 2H), 7.04 (d, *J* = 8.7 Hz, 1H), 5.51 (s, 1H), 5.05 (t, *J* = 6.0 Hz, 1H), 2.75-2.83 (m, 1H), 2.46-2.54 (m, 1H), 1.88-2.04 (m, 2H), 1.66 (s, 3H), 1.58 (s, 3H), 1.45 (s, 9H), 1.10-1.39 (m, 3H), 0.82 (d, *J* = 6.6 Hz, 3H)

**<sup>13</sup>CNMR** (75 MHz, CDCl<sub>3</sub>) δ 168.16, 139.89, 138.33, 132.58, 132.02, 131.27, 129.50, 124.59, 119.16, 51.98, 40.03, 37.04, 34.43, 28.74, 25.72, 25.58, 19.25, 17.64.

**HRMS (ESI):** C<sub>20</sub>H<sub>30</sub>BrNO+Na<sup>+</sup> Calcd: 402.1403, Found: 402.1408.

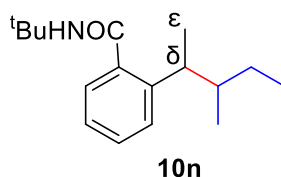

***N*-(tert-butyl)-2-(3-methylpentan-2-yl)benzamide (10n, δ : ε = 2 : 1)**, 24.5 mg, yield: 47%. Pale yellow solid, mp: 51-54°C.

**<sup>1</sup>HNMR** (300 MHz, CDCl<sub>3</sub>) δ 7.24-7.34 (m, 3H), 7.09-7.18 (m, 1H), 5.50 (s, 1H), 2.55-3.08 (m, 1H), 1.58-1.64 (m, 2H), 1.45 (s, 9H), 1.19-1.27 (m, 4H), 0.68-0.91 (m, 6H).

**<sup>13</sup>CNMR** (75 MHz, CDCl<sub>3</sub>) δ 170.15, 145.00, 138.28, 138.16, 129.29, 127.00, 126.92, 126.34, 126.14, 125.33, 51.74, 40.38, 40.20, 40.14, 28.84, 27.97, 25.85, 19.58, 18.56, 17.60, 15.62, 11.64, 10.73.

**HRMS (ESI):** C<sub>17</sub>H<sub>27</sub>NO+Na<sup>+</sup> Calcd: 284.1985, Found: 284.1992.

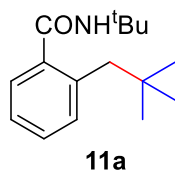

***N*-(tert-butyl)-2-neopentylbenzamide (11a)**, 25.7 mg, yield: 52%. Pale yellow solid, mp: 65-68°C.  
<sup>1</sup>HNMR (300 MHz, CDCl<sub>3</sub>) δ 7.31 (t, *J* = 7.5 Hz, 2H), 7.19 (t, *J* = 6.3 Hz, 2H), 5.57 (s, 1H), 2.86 (s, 2H), 1.45 (s, 9H), 0.90 (s, 9H).  
<sup>13</sup>CNMR (75 MHz, CDCl<sub>3</sub>) δ 170.20, 138.81, 137.80, 132.61, 128.64, 127.00, 125.75, 51.64, 45.08, 32.55, 29.73, 28.80.  
**HRMS (ESI):** C<sub>16</sub>H<sub>25</sub>NO+Na<sup>+</sup> Calcd: 270.1828, Found: 270.1827.

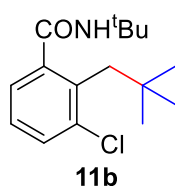

***N*-(tert-butyl)-3-chloro-2-neopentylbenzamide (11b)**, 18.2 mg, yield: 43%. Pale yellow solid, mp: 49-50°C.  
<sup>1</sup>HNMR (300 MHz, CDCl<sub>3</sub>) δ 7.11-7.27 (m, 3H), 5.43 (s, 1H), 2.64 (s, 2H), 1.48 (s, 9H), 0.95 (s, 9H).  
<sup>13</sup>CNMR (75 MHz, CDCl<sub>3</sub>) δ 166.37, 139.17, 138.32, 130.84, 129.64, 128.67, 127.13, 52.20, 45.90, 32.37, 30.09, 28.67.  
**HRMS (ESI):** C<sub>16</sub>H<sub>24</sub>ClNO+Na<sup>+</sup> Calcd: 304.1439, Found: 304.1443.

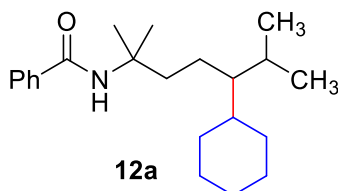

***N*-(5-cyclohexyl-2,6-dimethylheptan-2-yl)benzamide (12a)**, 42.2 mg, yield: 64%. Yellow oil.  
<sup>1</sup>HNMR (300 MHz, CDCl<sub>3</sub>) δ 7.70 (d, *J* = 6.9 Hz, 2H), 7.38-7.48 (m, 3H), 5.83 (s, 1H), 1.56-1.83 (m, 6H), 1.44 (s, 6H), 0.96-1.35 (m, 9H), 0.85-0.89 (m, 8H).  
<sup>13</sup>CNMR (75 MHz, CDCl<sub>3</sub>) δ 166.84, 136.24, 130.97, 128.49, 126.63, 54.48, 49.77, 41.43, 40.22, 31.79, 30.07, 28.90, 26.89, 22.12, 21.46, 19.19.  
**HRMS (ESI):** C<sub>22</sub>H<sub>35</sub>NO+Na<sup>+</sup> Calcd: 352.2611, Found: 352.2616.

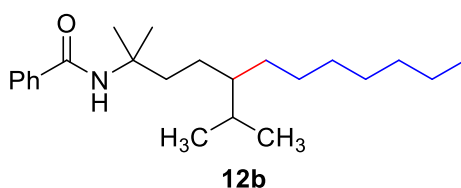

***N*-(5-isopropyl-2-methyldodecan-2-yl)benzamide (12b)**, 38.7 mg, yield: 56%. Yellow oil.  
<sup>1</sup>HNMR (300 MHz, CDCl<sub>3</sub>) δ 7.70 (d, *J* = 6.9 Hz, 2H), 7.38-7.48 (m, 3H), 5.82 (s, 1H), 1.67-1.81

(m, 3H), 1.43 (s, 6H), 0.95-1.25 (m, 14H), 0.80-0.90 (m, 10H).

$^{13}\text{CNMR}$  (75 MHz,  $\text{CDCl}_3$ )  $\delta$  166.83, 136.19, 130.99, 128.49, 126.63, 54.33, 44.09, 38.39, 31.91, 30.48, 30.08, 29.38, 29.23, 27.83, 26.97, 24.61, 22.68, 19.38, 19.14, 14.11.

**HRMS (ESI):**  $\text{C}_{23}\text{H}_{39}\text{NO}+\text{Na}^+$  Calcd: 368.2924, Found: 368.2934.

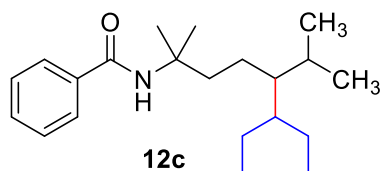

***N*-(6-ethyl-5-isopropyl-2-methyloctan-2-yl)benzamide (12c)**, 38.1 mg, yield: 60%. Yellow oil.

$^1\text{HNMR}$  (300 MHz,  $\text{CDCl}_3$ )  $\delta$  7.70 (d,  $J = 6.6$  Hz, 2H), 7.38-7.47 (m, 3H), 5.82 (s, 1H), 1.68-1.85 (m, 3H), 1.38 (s, 6H), 1.05-1.36 (m, 8H), 0.84-0.88 (m, 12H).

$^{13}\text{CNMR}$  (75 MHz,  $\text{CDCl}_3$ )  $\delta$  166.83, 136.22, 130.97, 128.48, 126.62, 54.44, 45.42, 42.98, 40.93, 29.25, 26.92, 23.98, 23.04, 22.00, 21.23, 20.34, 12.71, 12.21.

**HRMS (ESI):**  $\text{C}_{21}\text{H}_{35}\text{NO}+\text{Na}^+$  Calcd: 340.2611, Found: 340.2618.

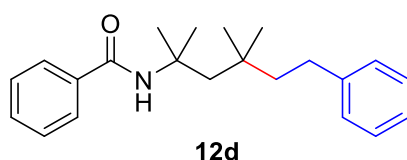

***N*-(2,4,4-trimethyl-6-phenylhexan-2-yl)benzamide (12d)**, 34.29 mg, yield: 53%. Yellow oil.

$^1\text{HNMR}$  (300 MHz,  $\text{CDCl}_3$ )  $\delta$  7.65 (d,  $J = 6.9$  Hz, 2H), 7.35-7.49 (m, 4H), 7.22-7.28 (m, 1H), 7.15 (d,  $J = 7.5$  Hz, 3H), 5.93 (s, 1H), 2.61 (t,  $J = 8.7$  Hz, 2H), 1.97 (s, 2H), 1.64 (t,  $J = 7.8$  Hz, 2H), 1.55 (s, 6H), 1.11 (s, 6H).

$^{13}\text{CNMR}$  (75 MHz,  $\text{CDCl}_3$ )  $\delta$  166.74, 143.21, 136.20, 131.00, 128.53, 128.32, 126.60, 125.56, 55.53, 49.37, 47.13, 34.47, 30.71, 29.56, 28.64.

**HRMS (ESI):**  $\text{C}_{22}\text{H}_{29}\text{NO}+\text{Na}^+$  Calcd: 346.2147, Found: 346.2146.

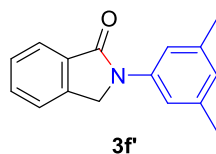

**2-(3,5-dimethylphenyl)isoindolin-1-one (3f')**, 22.5 mg, yield: 95%. White solid, mp: 132-135°C.

$^1\text{HNMR}$  (300 MHz,  $\text{CDCl}_3$ ):  $\delta$  7.92 (d,  $J = 8.1$  Hz, 1H), 7.57-7.62 (m, 1H), 7.49-7.52 (m, 4H), 6.84 (s, 1H), 4.84 (s, 2H), 2.37 (s, 6H).

$^{13}\text{CNMR}$  (75 MHz,  $\text{CDCl}_3$ ):  $\delta$  167.46, 140.20, 139.35, 138.82, 133.38, 131.95, 128.32, 126.34, 124.10, 122.56, 117.51, 51.01, 21.60.

**HRMS (ESI):**  $\text{C}_{16}\text{H}_{15}\text{NO}+\text{Na}^+$  Calcd: 260.1046, Found: 260.1062.

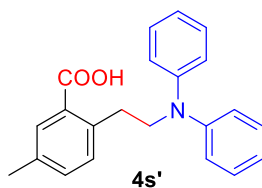

**2-(2-(diphenylamino)ethyl)-5-methylbenzoic acid (4s')**, 30.8 mg, yield: 93%. White solid, mp: 145-147°C.

**<sup>1</sup>HNMR** (300 MHz, CDCl<sub>3</sub>): δ 7.90 (s, 1H), 7.23-7.33 (m, 5H), 7.14 (d, *J* = 7.8 Hz, 1H), 7.05 (d, *J* = 7.8 Hz, 4H), 6.93 (t, *J* = 7.5 Hz, 2H), 4.01 (t, *J* = 7.5 Hz, 2H), 3.35 (t, *J* = 8.1 Hz, 2H), 2.40 (s, 3H).

**<sup>13</sup>CNMR** (75 MHz, CDCl<sub>3</sub>): δ 172.30, 147.85, 139.28, 136.27, 134.00, 132.18, 132.07, 129.21, 128.04, 121.08, 120.90, 53.71, 32.40, 20.90.

**HRMS (ESI):** C<sub>22</sub>H<sub>21</sub>NO<sub>2</sub>+Na<sup>+</sup> Calcd: 354.1465, Found: 354.1468.

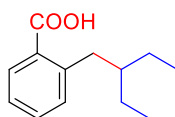

**2-(2-ethylbutyl)benzoic acid (10b')**, 21.6 mg, yield: 98%. White oil liquid.

**<sup>1</sup>HNMR** (300 MHz, CDCl<sub>3</sub>): δ 8.04 (d, *J* = 7.8 Hz, 1H), 7.45 (t, *J* = 7.5 Hz, 1H), 7.22-7.31 (m, 2H), 2.98 (d, *J* = 6.9 Hz, 2H), 1.52-1.59 (m, 1H), 1.25-1.36 (m, 4H), 0.87 (t, *J* = 7.5 Hz, 6H).

**<sup>13</sup>CNMR** (75 MHz, CDCl<sub>3</sub>): δ 173.65, 144.92, 132.36, 132.33, 131.64, 128.66, 125.82, 42.43, 38.34, 25.09, 10.73.

**HRMS (ESI):** C<sub>13</sub>H<sub>18</sub>O<sub>2</sub>+Na<sup>+</sup> Calcd: 229.1199, Found: 229.1201.

## NMR spectra of the products.

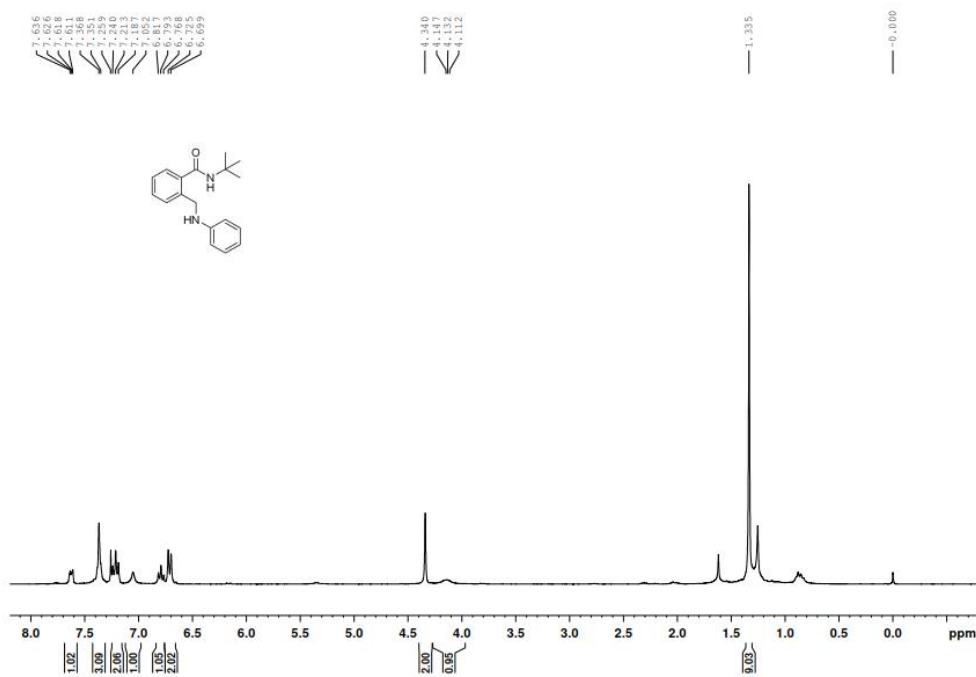

Supplementary Figure 22. <sup>1</sup>H NMR (300 MHz, CDCl<sub>3</sub>) spectra for compound 3a.

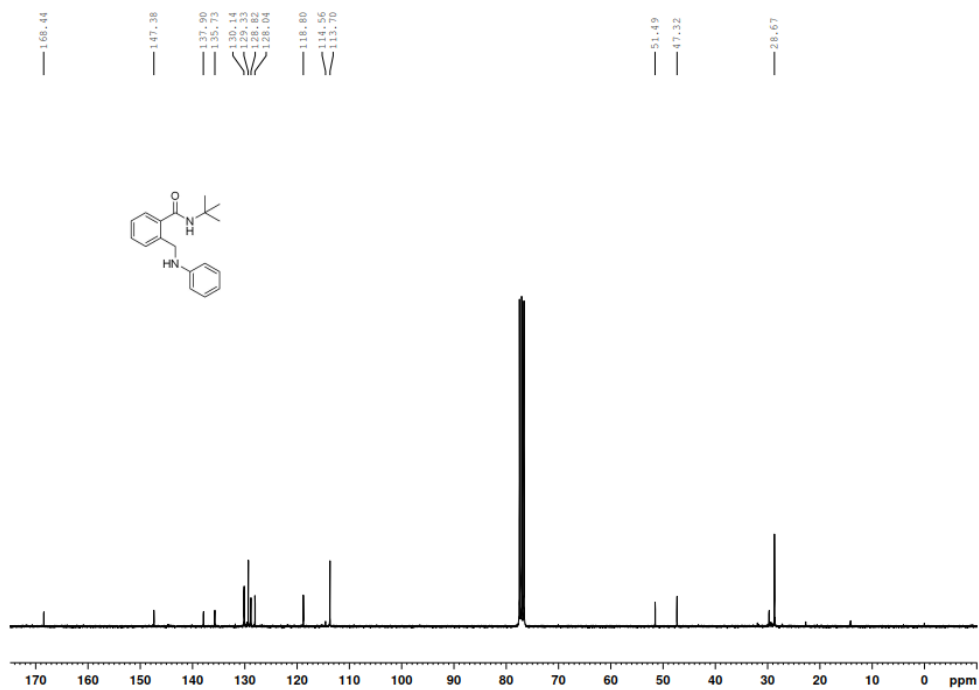

Supplementary Figure 23. <sup>13</sup>C NMR (75 MHz, CDCl<sub>3</sub>) spectra for compound 3a.

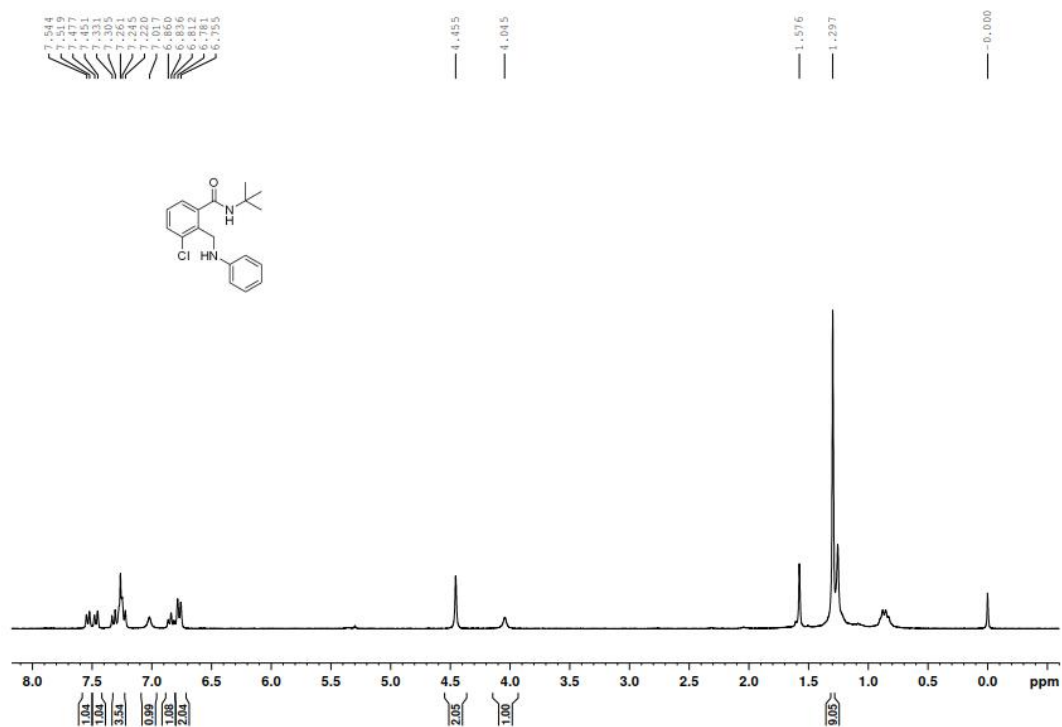

Supplementary Figure 24. <sup>1</sup>H NMR (300 MHz, CDCl<sub>3</sub>) spectra for compound 3b.

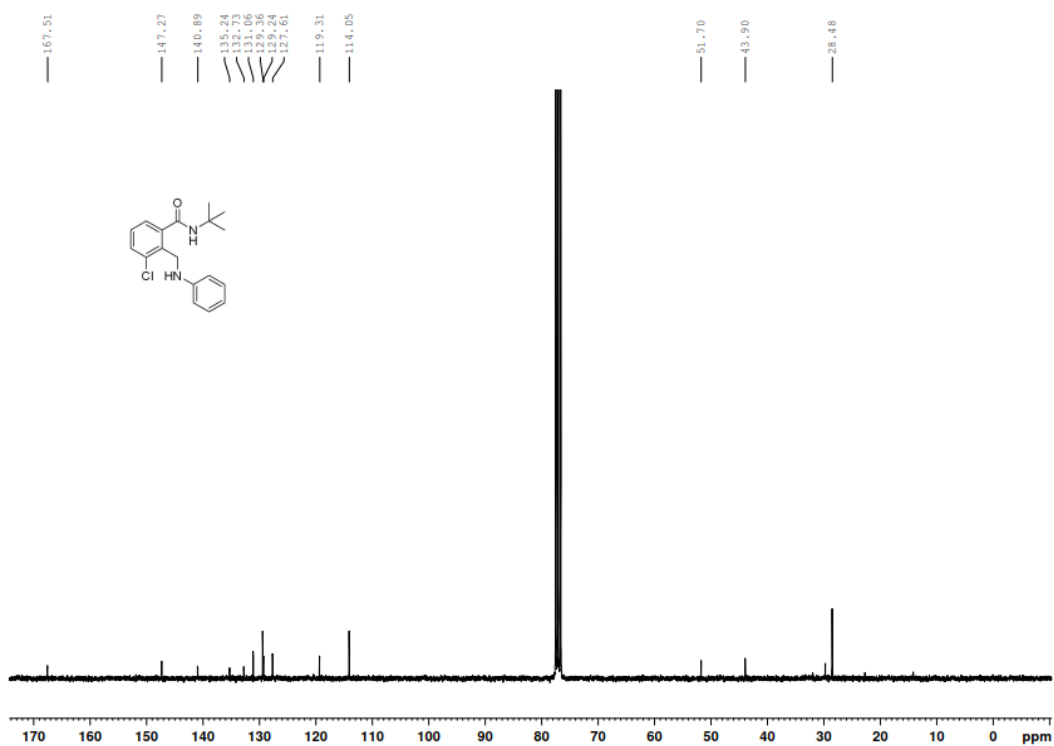

Supplementary Figure 25. <sup>13</sup>C NMR (75 MHz, CDCl<sub>3</sub>) spectra for compound 3b.

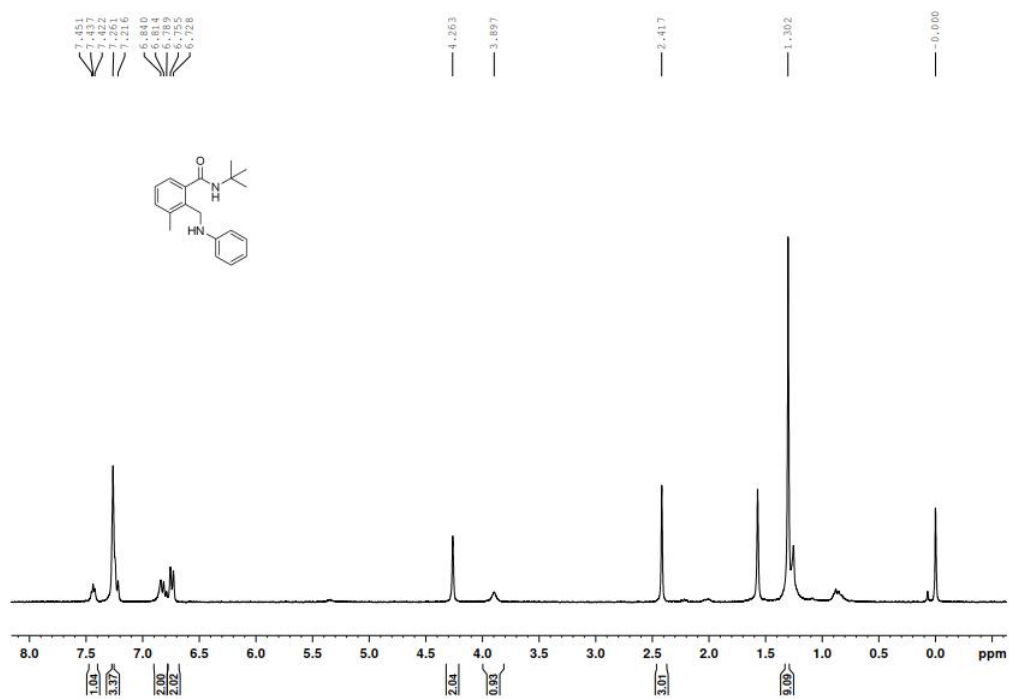

Supplementary Figure 26. <sup>1</sup>H NMR (300 MHz, CDCl<sub>3</sub>) spectra for compound 3c.

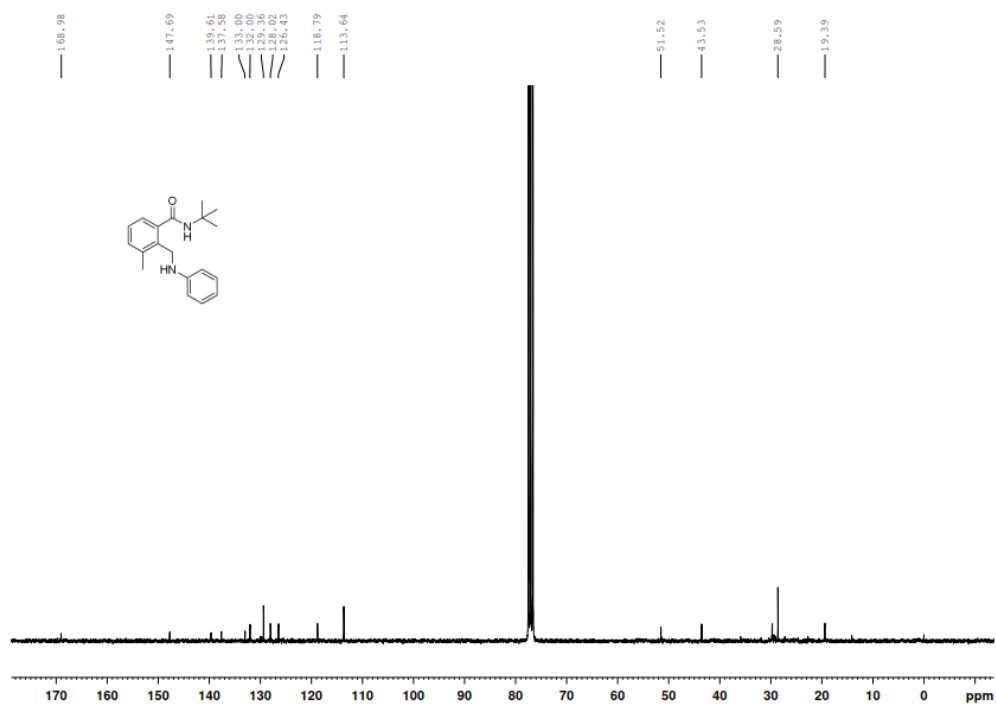

Supplementary Figure 27. <sup>13</sup>C NMR (75 MHz, CDCl<sub>3</sub>) spectra for compound 3c.



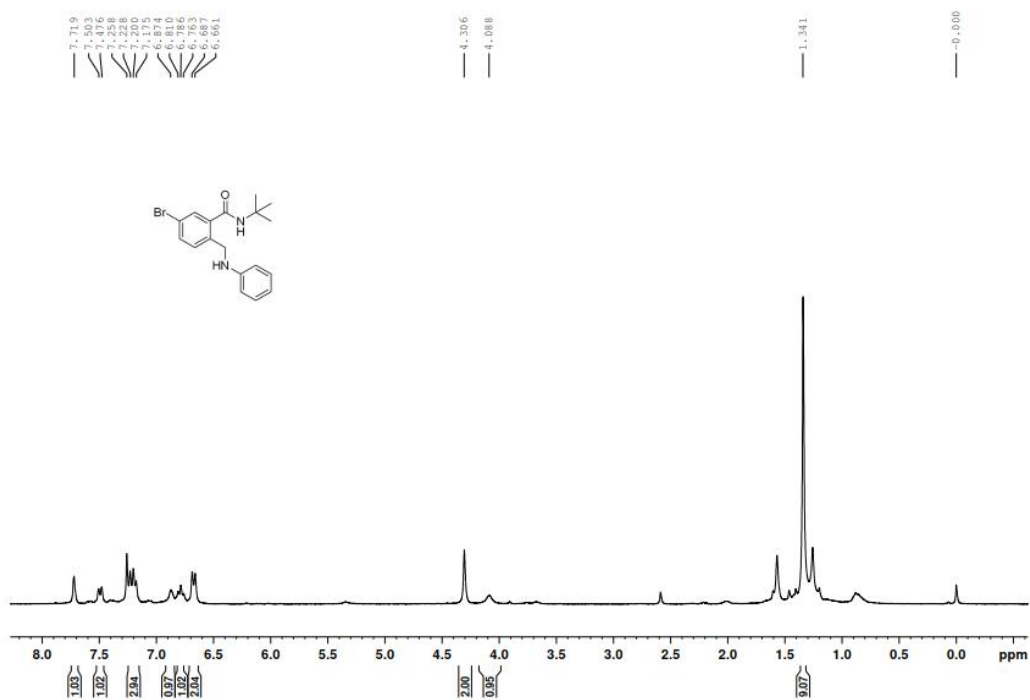

Supplementary Figure 28. <sup>1</sup>H NMR (300 MHz, CDCl<sub>3</sub>) spectra for compound 3d.

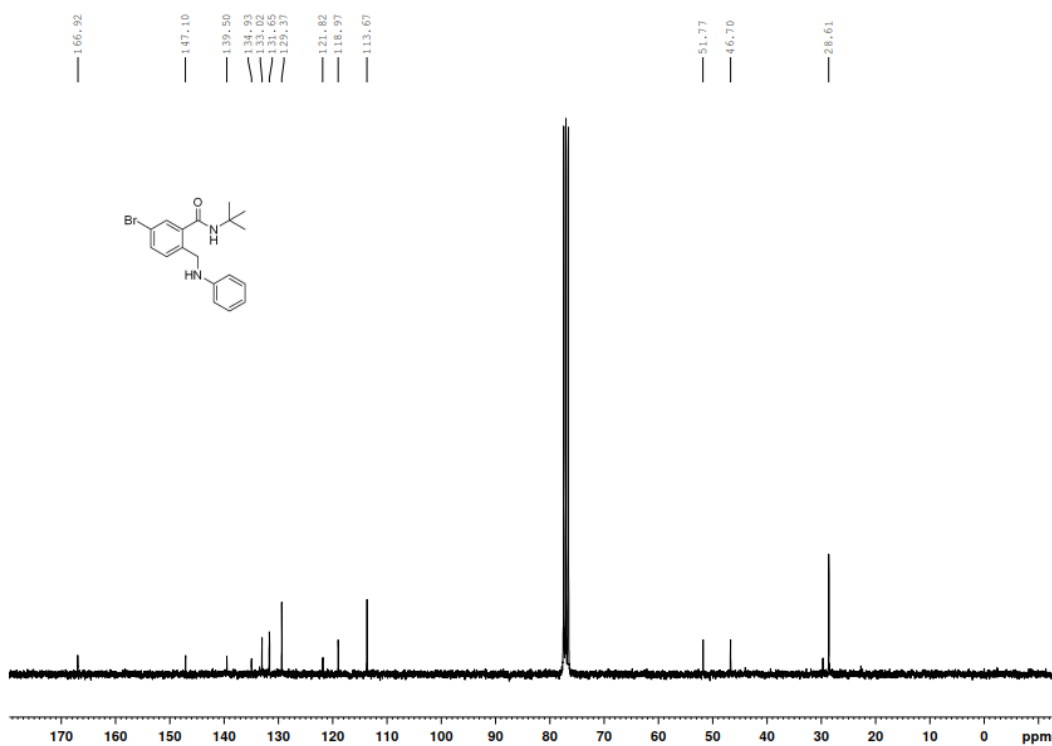

Supplementary Figure 29. <sup>13</sup>C NMR (75 MHz, CDCl<sub>3</sub>) spectra for compound 3d.

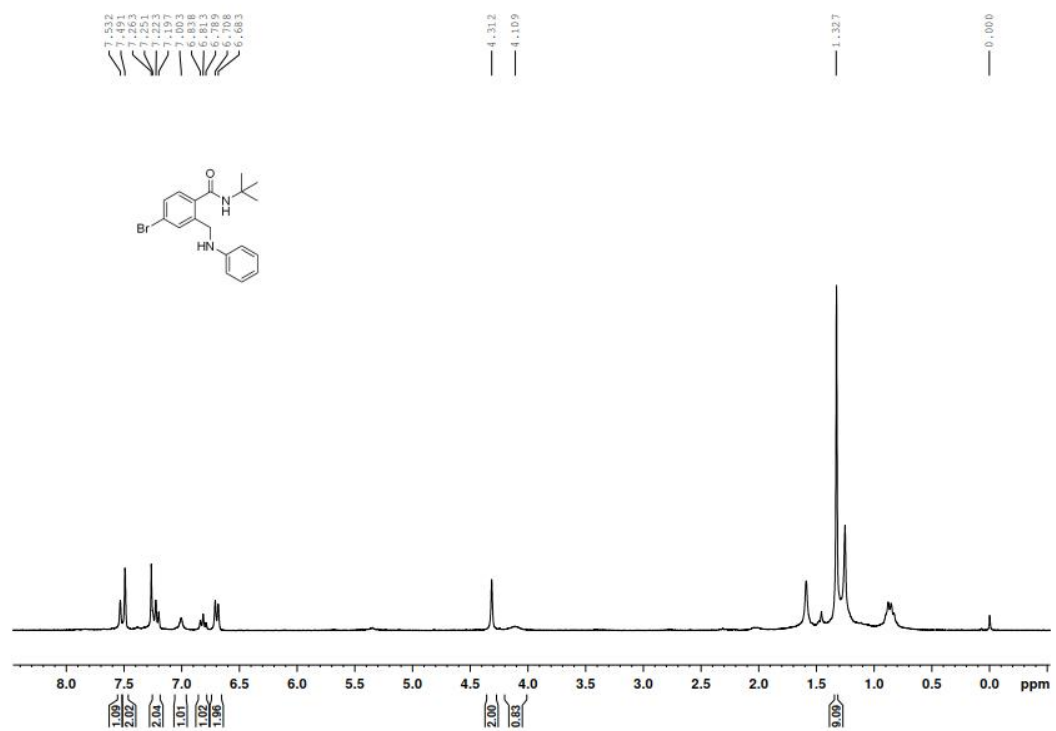

Supplementary Figure 30. <sup>1</sup>H NMR (300 MHz, CDCl<sub>3</sub>) spectra for compound 3e.

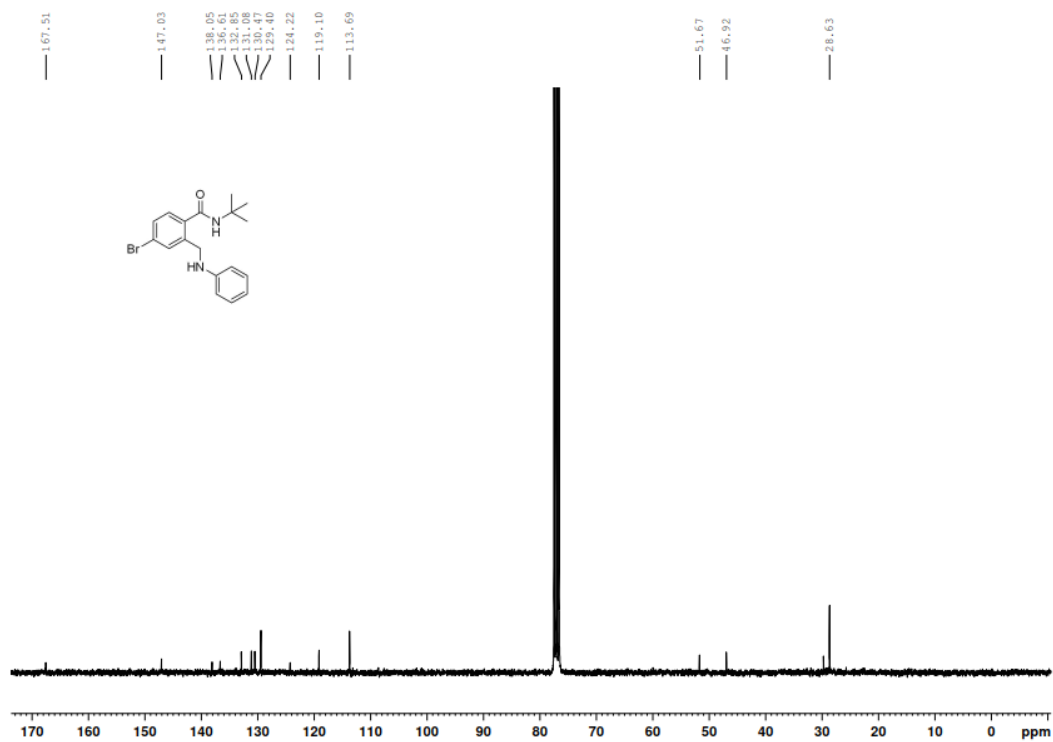

Supplementary Figure 31. <sup>13</sup>C NMR (75 MHz, CDCl<sub>3</sub>) spectra for compound 3e.

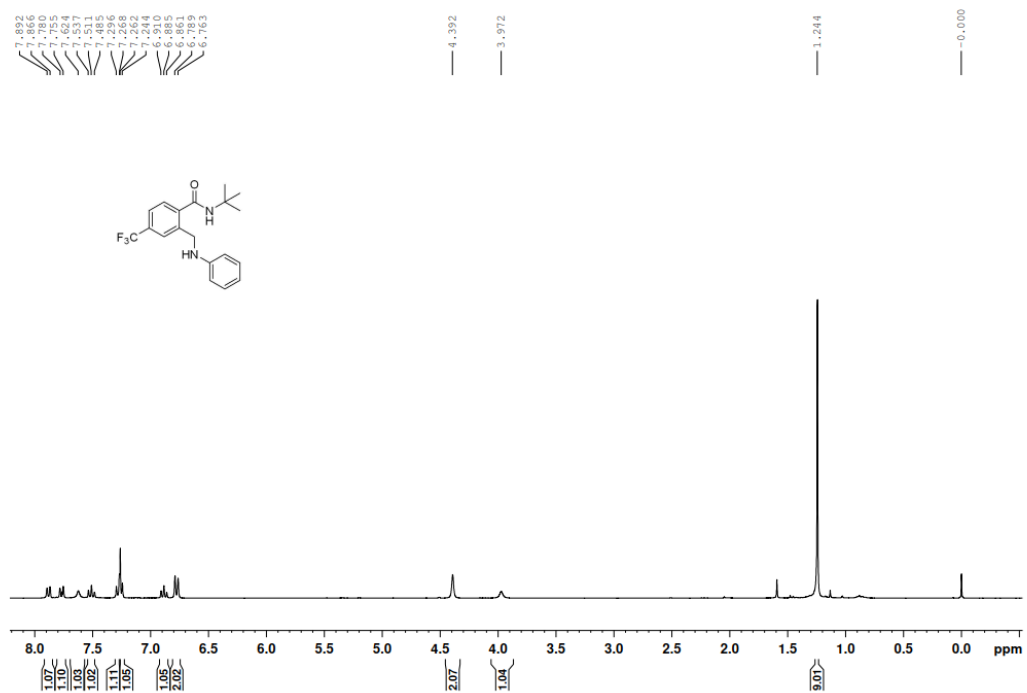

Supplementary Figure 32. <sup>1</sup>H NMR (300 MHz, CDCl<sub>3</sub>) spectra for compound 3f.

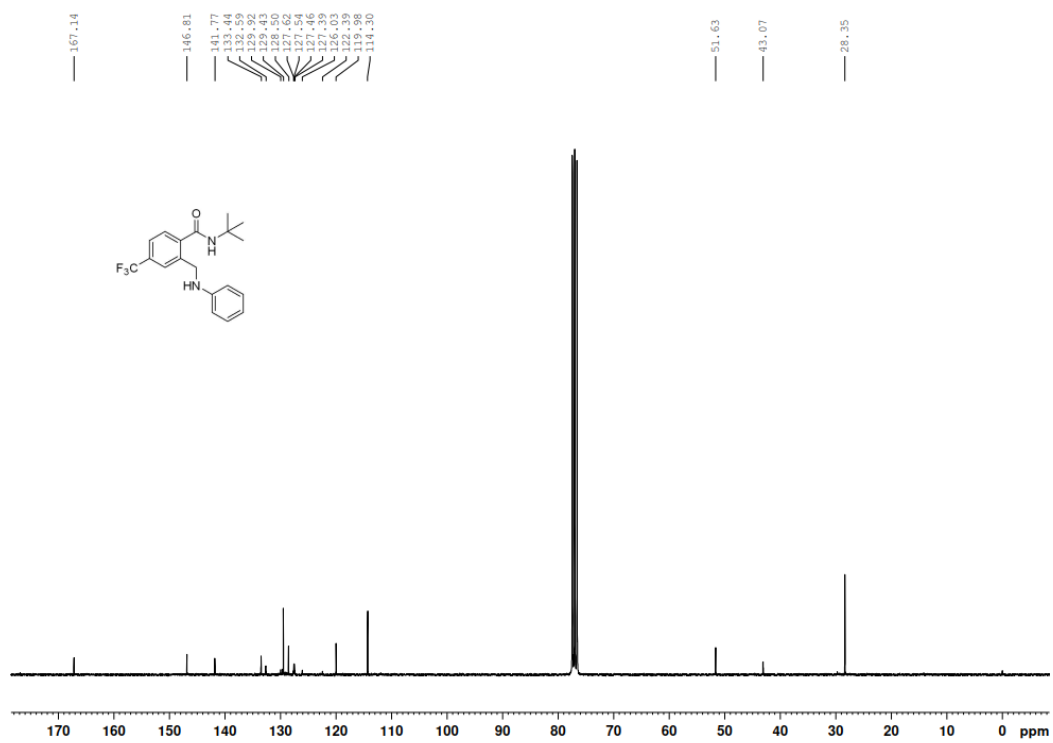

Supplementary Figure 33. <sup>13</sup>C NMR (75 MHz, CDCl<sub>3</sub>) spectra for compound 3f.

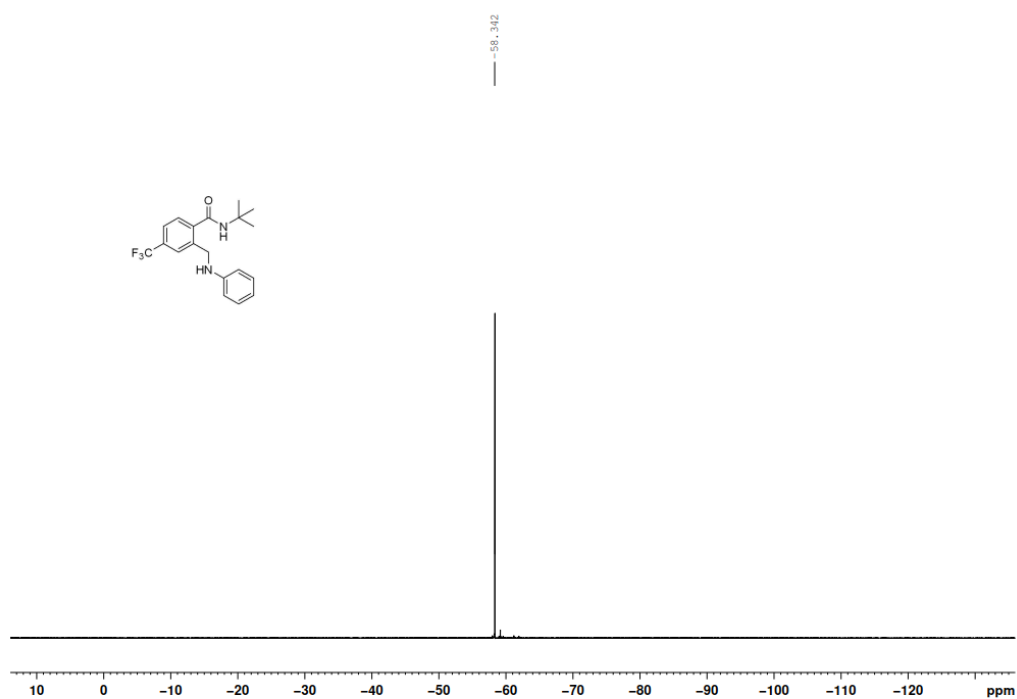

Supplementary Figure 34.  $^{19}\text{F}$  NMR (282 MHz,  $\text{CDCl}_3$ ) spectra for compound 3f.

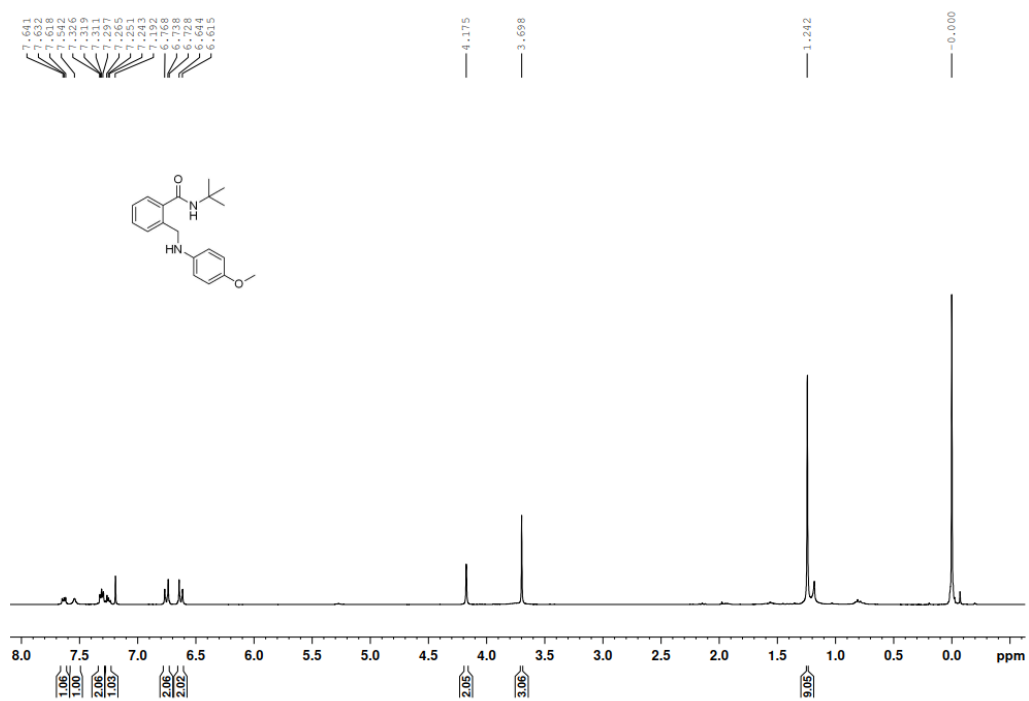

Supplementary Figure 35.  $^1\text{H}$  NMR (300 MHz,  $\text{CDCl}_3$ ) spectra for compound 3g.

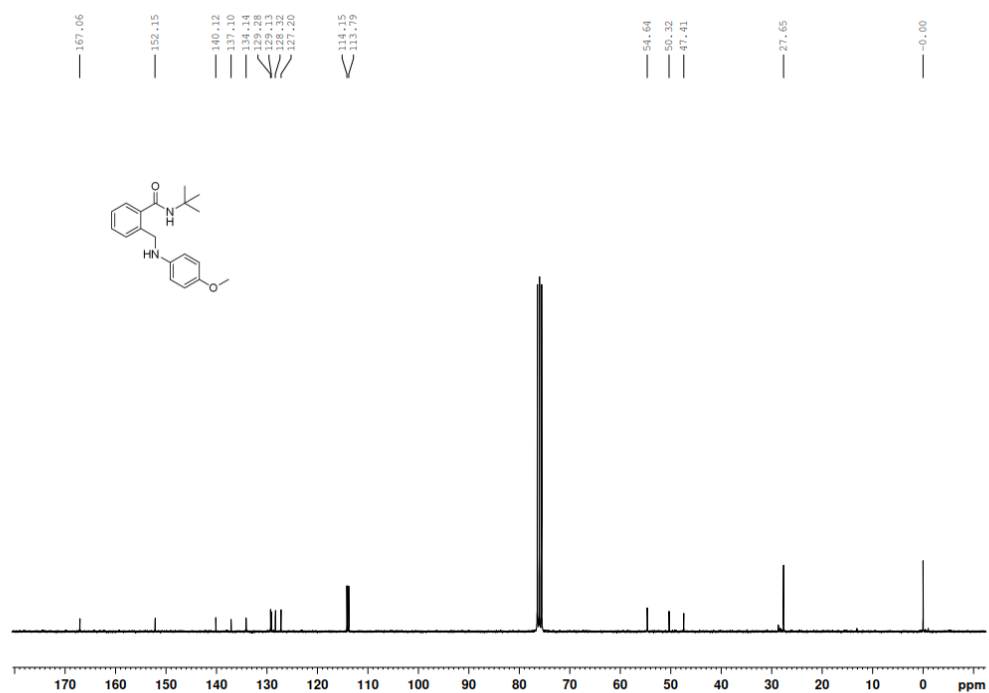

Supplementary Figure 36. <sup>13</sup>C NMR (75 MHz, CDCl<sub>3</sub>) spectra for compound 3g.

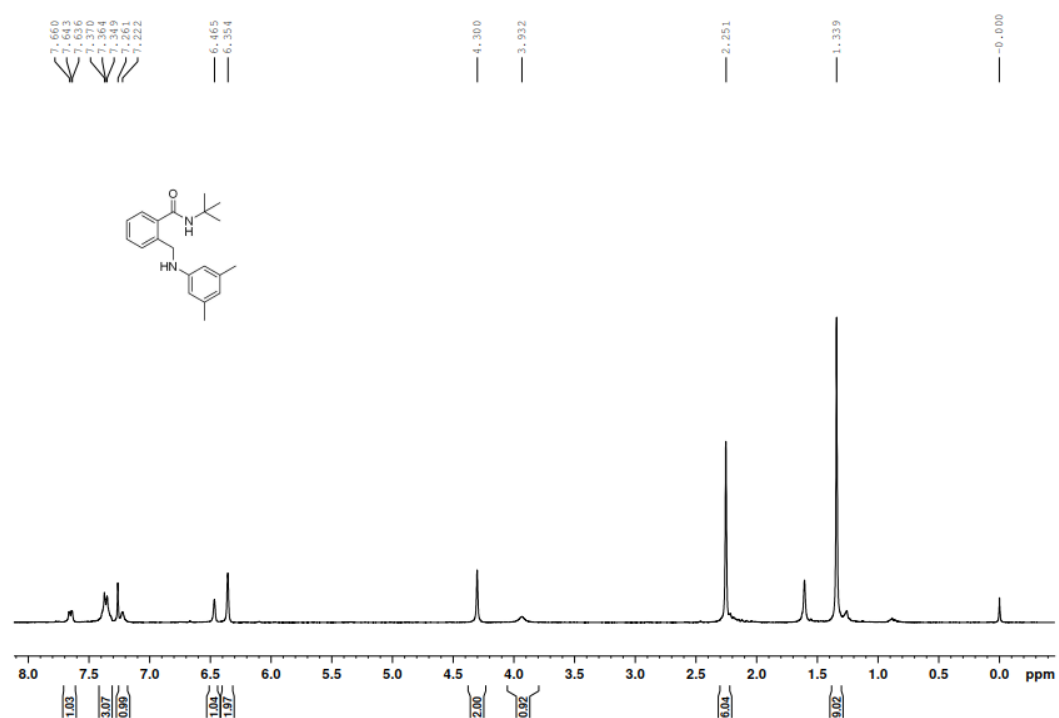

Supplementary Figure 37. <sup>1</sup>H NMR (300 MHz, CDCl<sub>3</sub>) spectra for compound 3h.

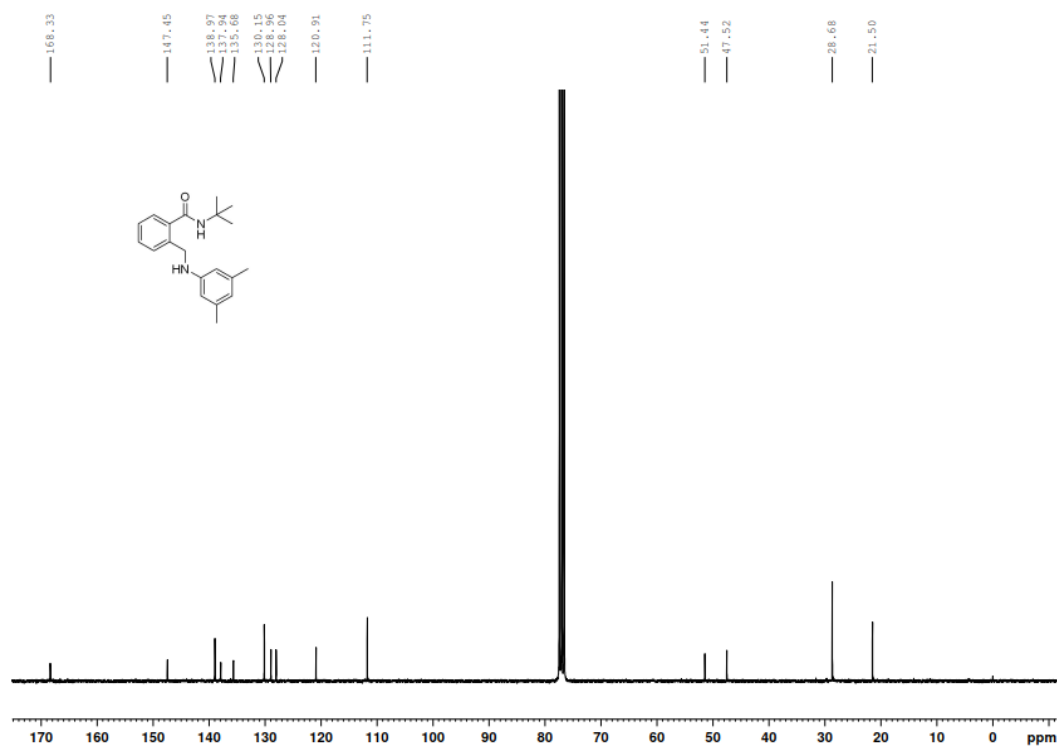

Supplementary Figure 38. <sup>13</sup>C NMR (75 MHz, CDCl<sub>3</sub>) spectra for compound 3h.

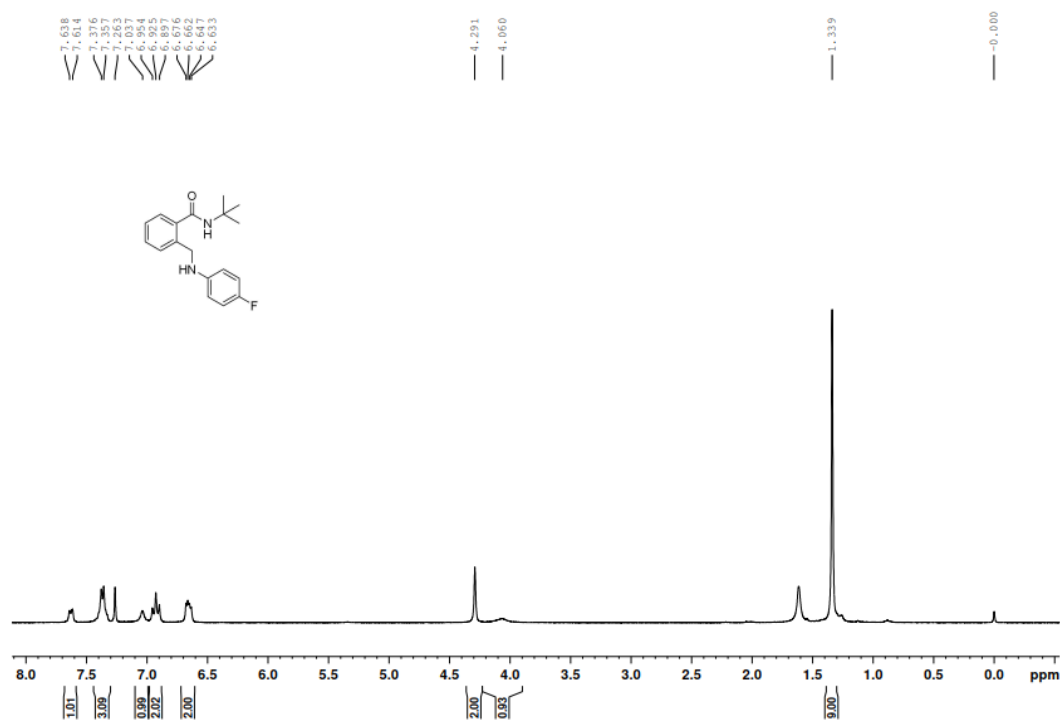

Supplementary Figure 39. <sup>1</sup>H NMR (300 MHz, CDCl<sub>3</sub>) spectra for compound 3i.

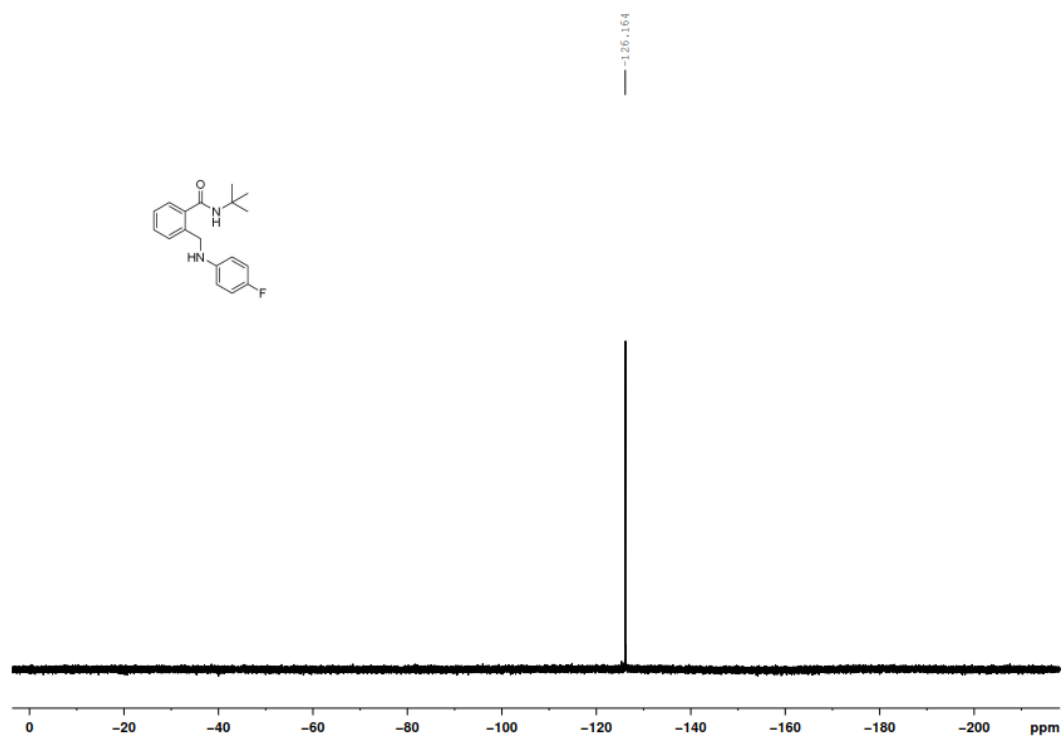

Supplementary Figure 40.  $^{19}\text{F}$  NMR (282 MHz,  $\text{CDCl}_3$ ) spectra for compound 3i.

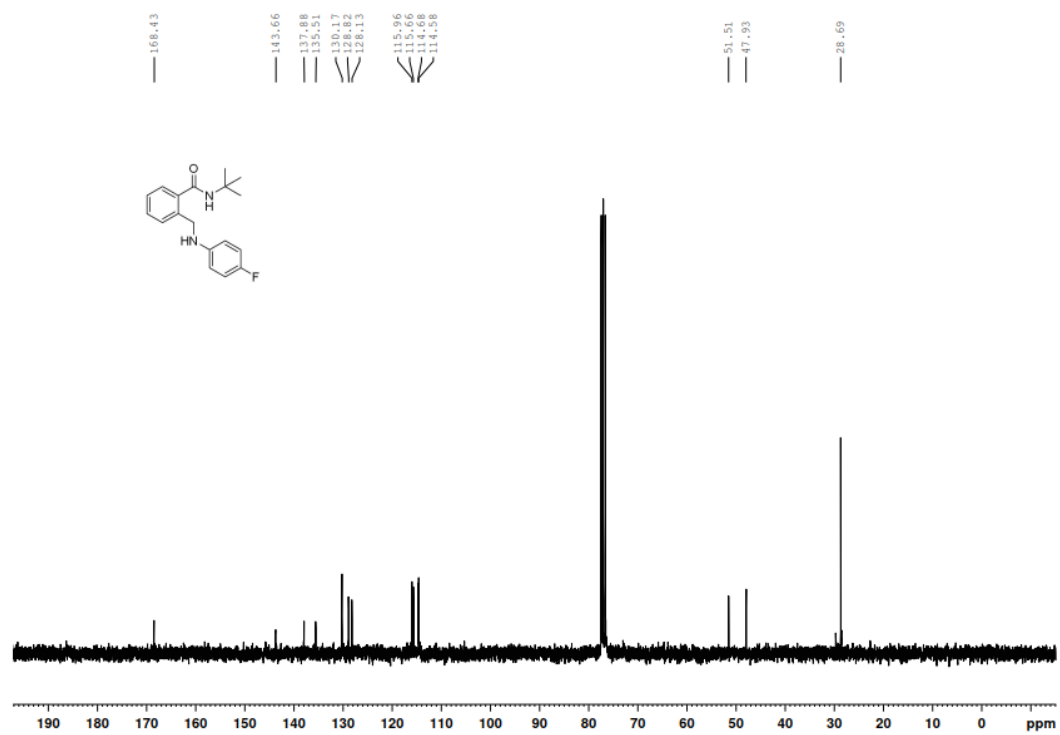

Supplementary Figure 41.  $^{13}\text{C}$  NMR (75 MHz,  $\text{CDCl}_3$ ) spectra for compound 3i.

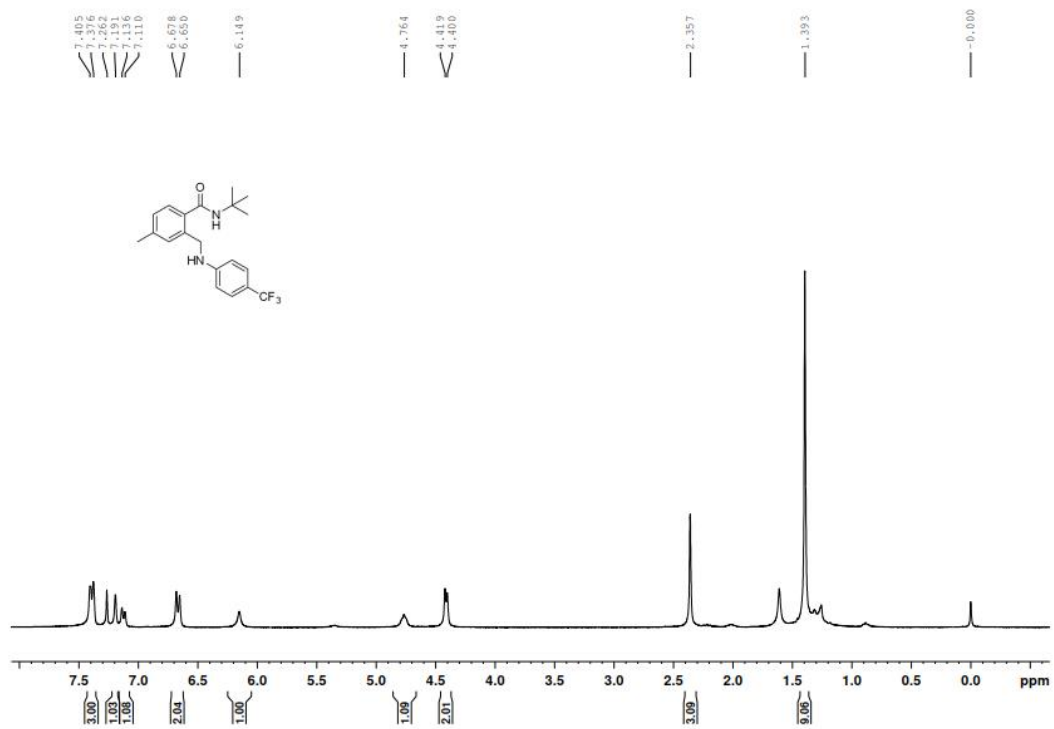

Supplementary Figure 42. <sup>1</sup>H NMR (300 MHz, CDCl<sub>3</sub>) spectra for compound 3j.

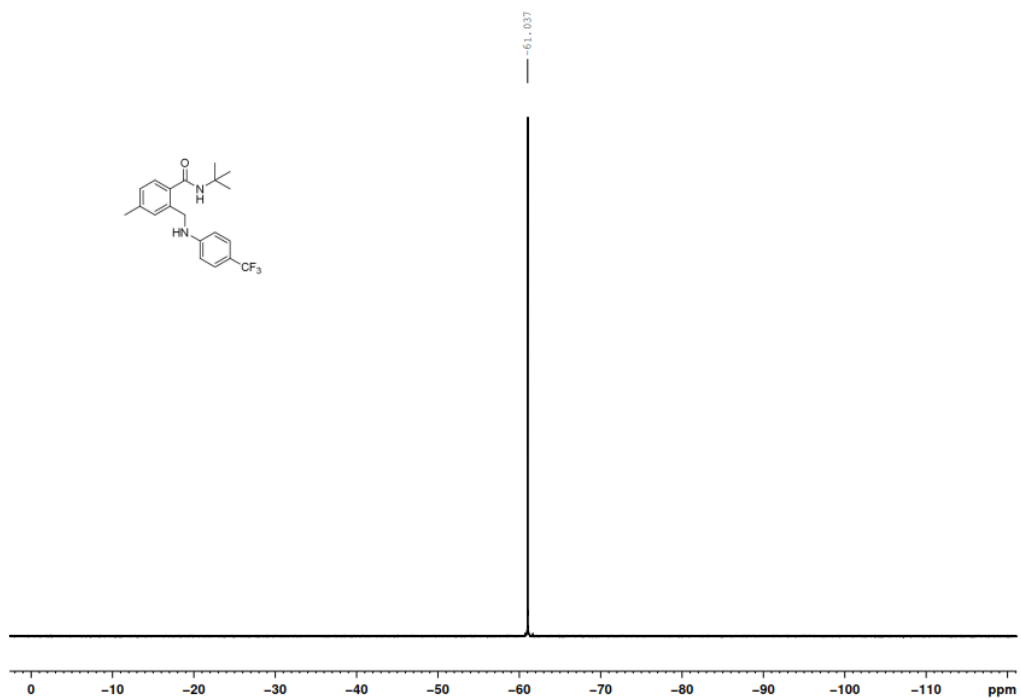

Supplementary Figure 43. <sup>19</sup>F NMR (282 MHz, CDCl<sub>3</sub>) spectra for compound 3j.



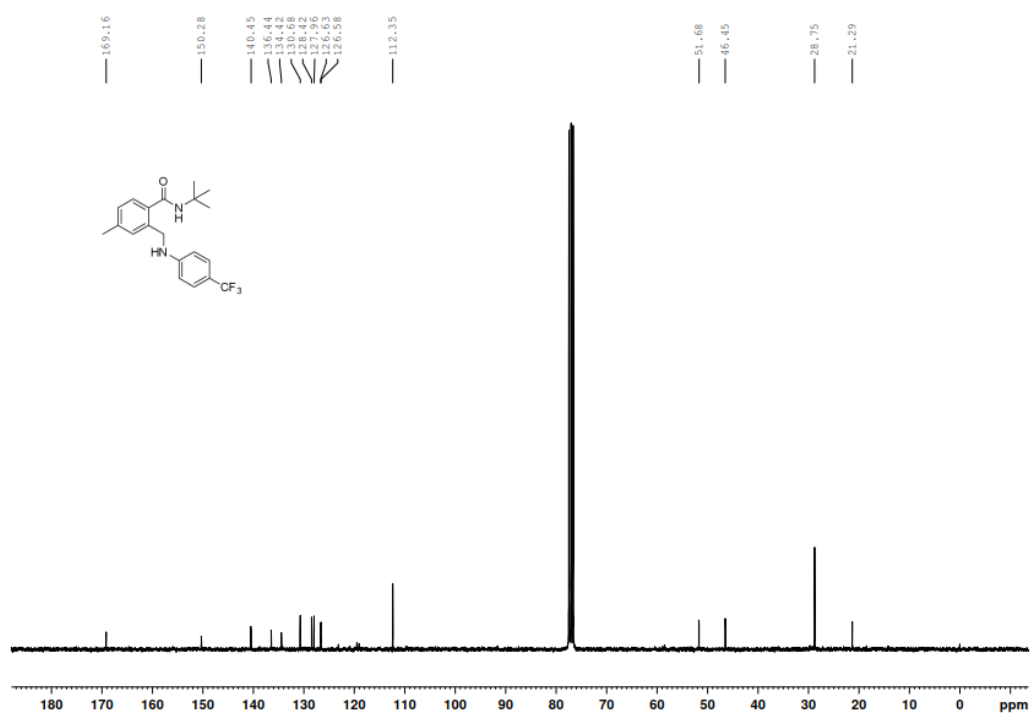

Supplementary Figure 44. <sup>13</sup>C NMR (75 MHz, CDCl<sub>3</sub>) spectra for compound 3j.

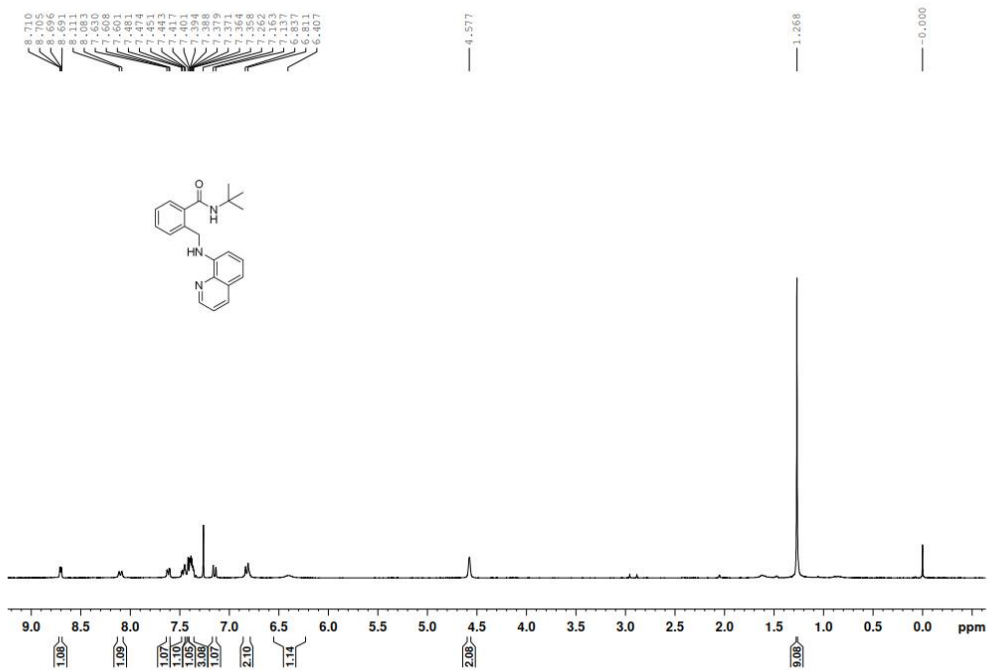

Supplementary Figure 45. <sup>1</sup>H NMR (300 MHz, CDCl<sub>3</sub>) spectra for compound 3k.

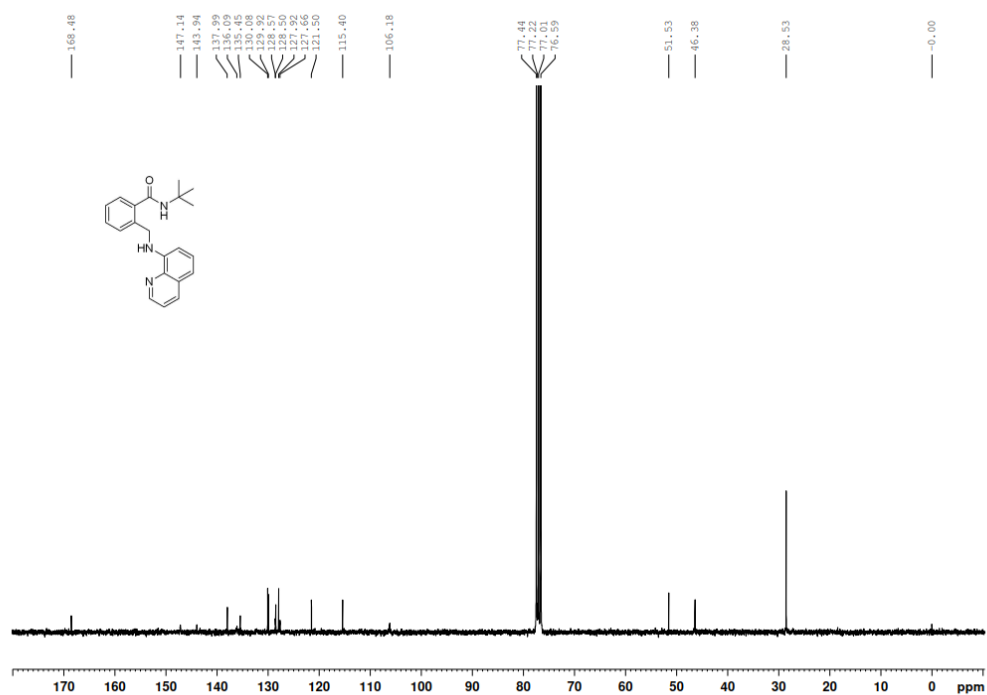

Supplementary Figure 46. <sup>13</sup>C NMR (75 MHz, CDCl<sub>3</sub>) spectra for compound 3k.

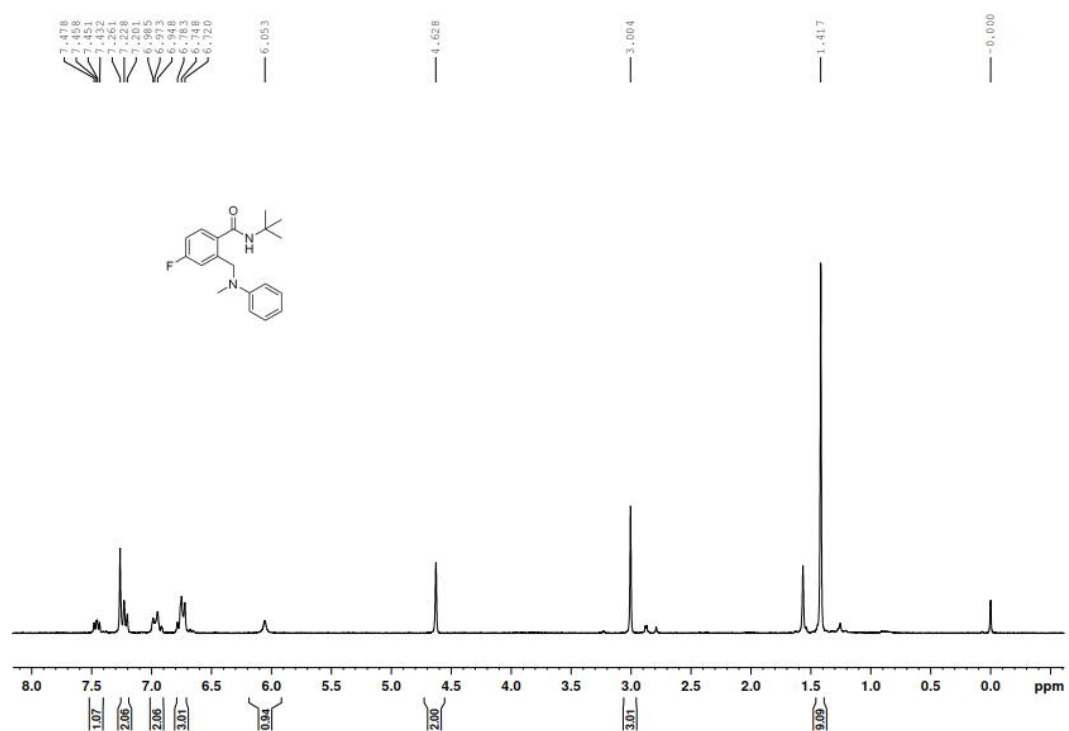

Supplementary Figure 47. <sup>1</sup>H NMR (300 MHz, CDCl<sub>3</sub>) spectra for compound 3l.

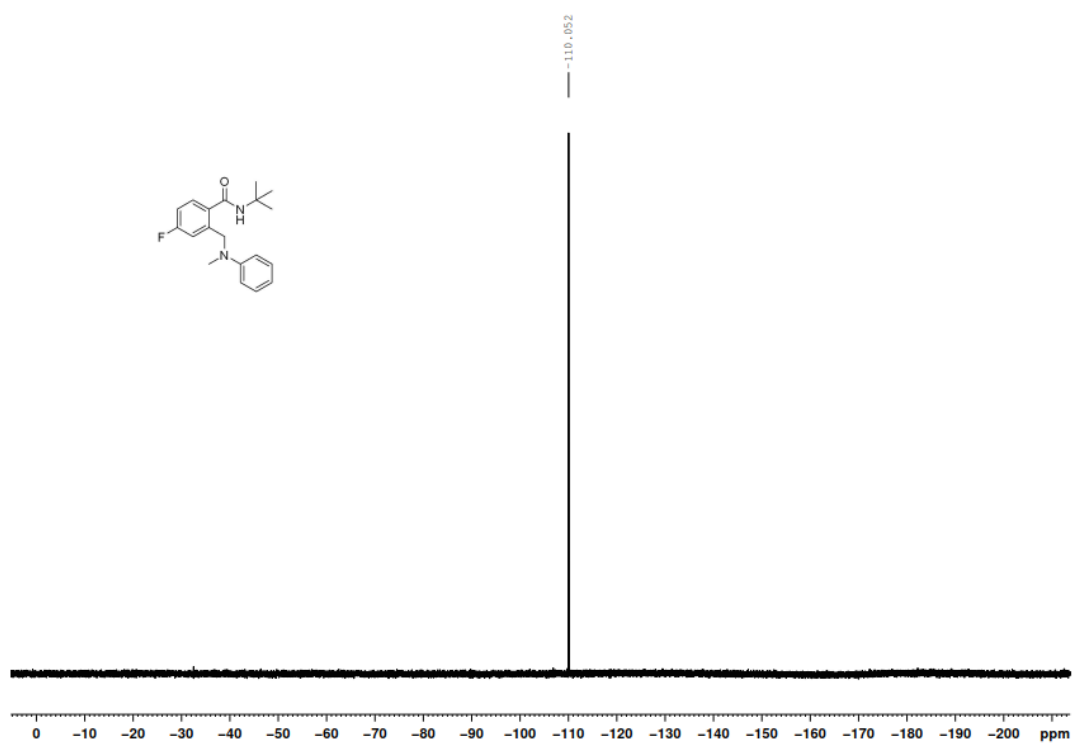

Supplementary Figure 48.  $^{19}\text{F}$  NMR (282 MHz,  $\text{CDCl}_3$ ) spectra for compound 31.

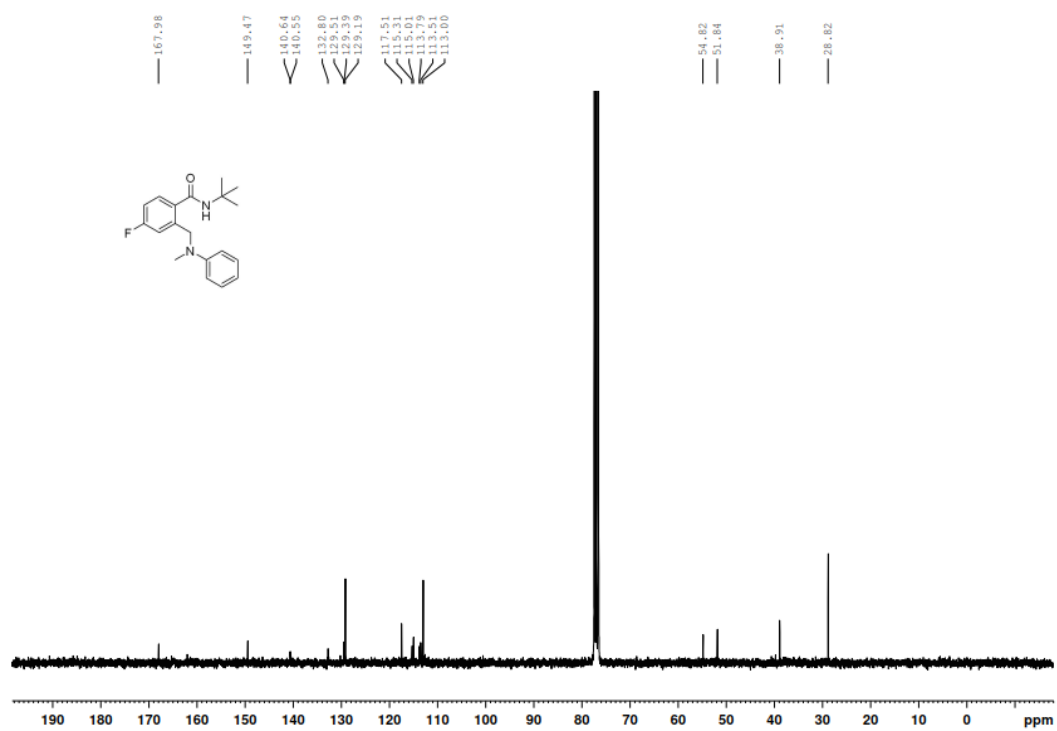

Supplementary Figure 49.  $^{13}\text{C}$  NMR (75 MHz,  $\text{CDCl}_3$ ) spectra for compound 31.

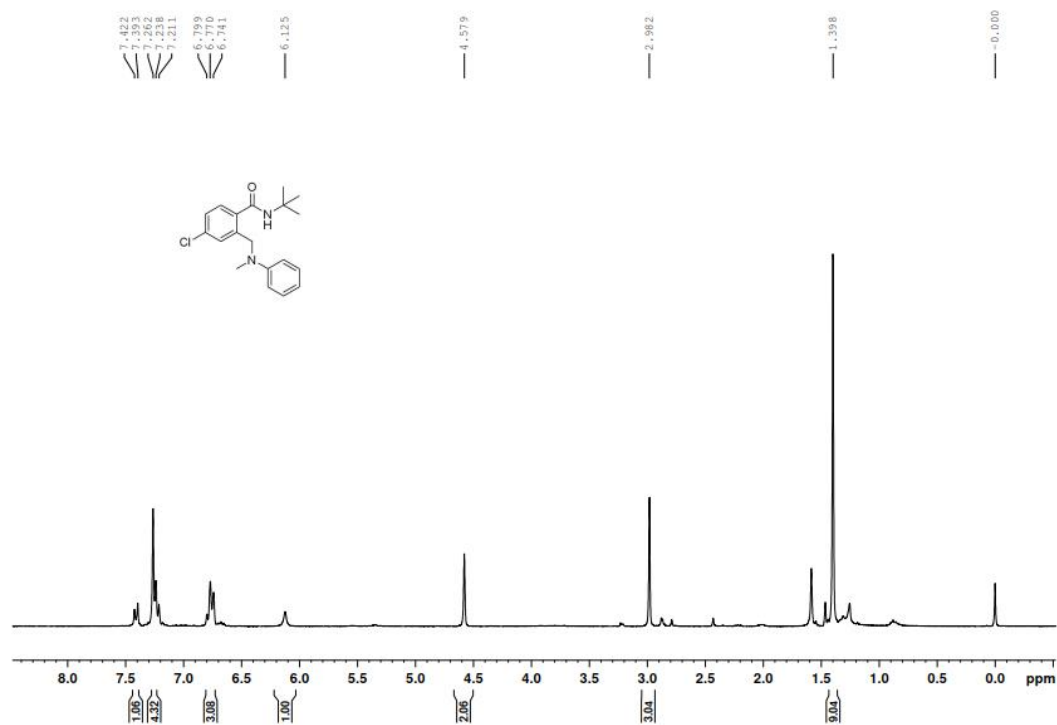

Supplementary Figure 50. <sup>1</sup>H NMR (300 MHz, CDCl<sub>3</sub>) spectra for compound 3m.

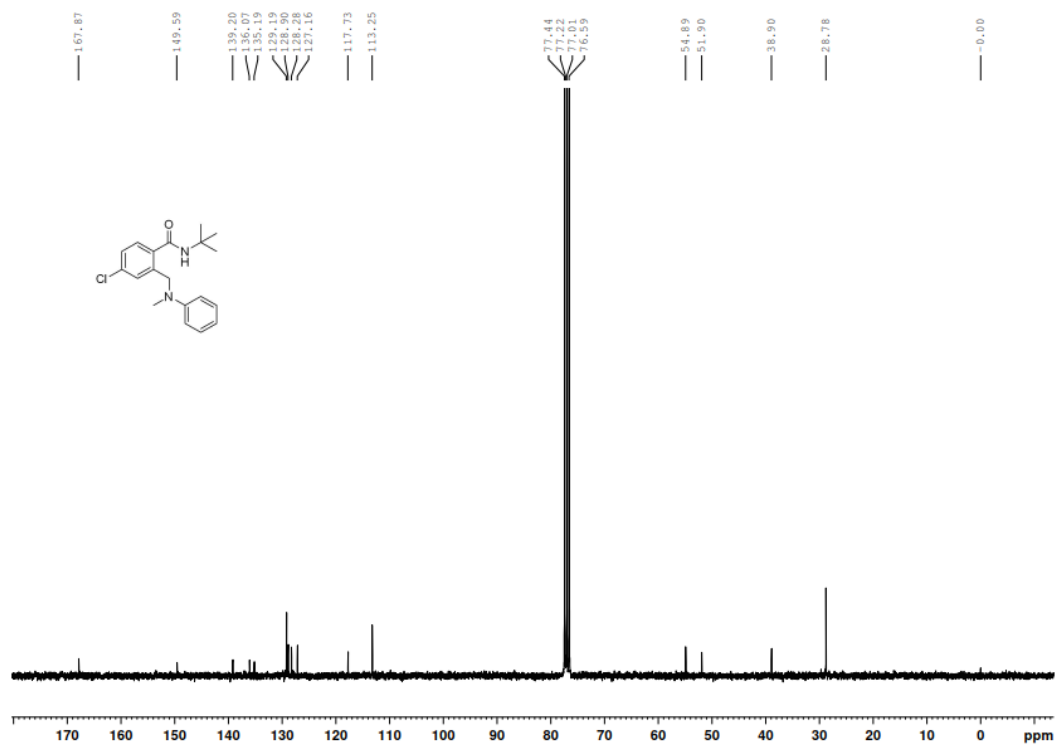

Supplementary Figure 51. <sup>13</sup>C NMR (75 MHz, CDCl<sub>3</sub>) spectra for compound 3m.

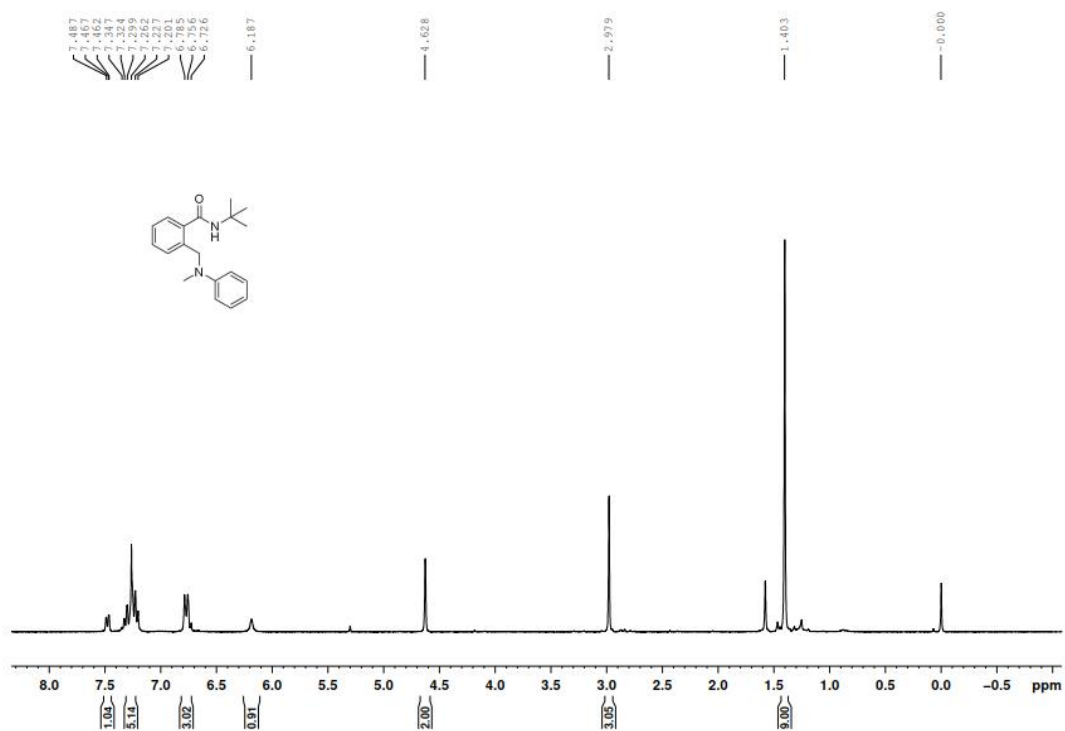

Supplementary Figure 52. <sup>1</sup>H NMR (300 MHz, CDCl<sub>3</sub>) spectra for compound 3n.

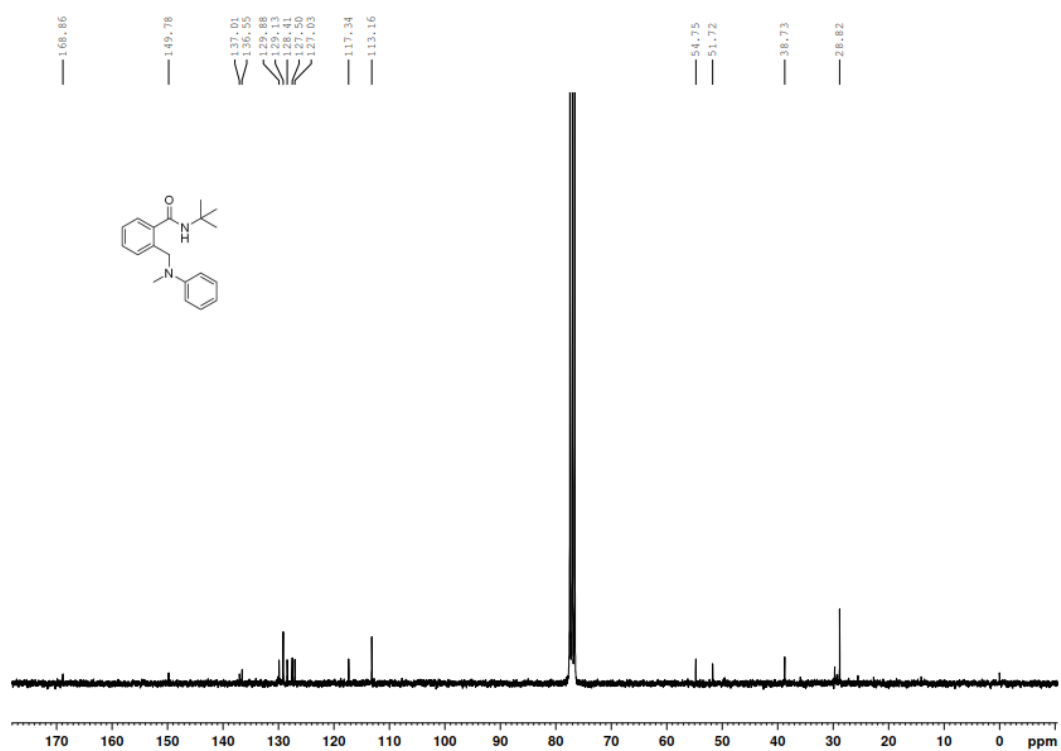

Supplementary Figure 53. <sup>13</sup>C NMR (75 MHz, CDCl<sub>3</sub>) spectra for compound 3n.

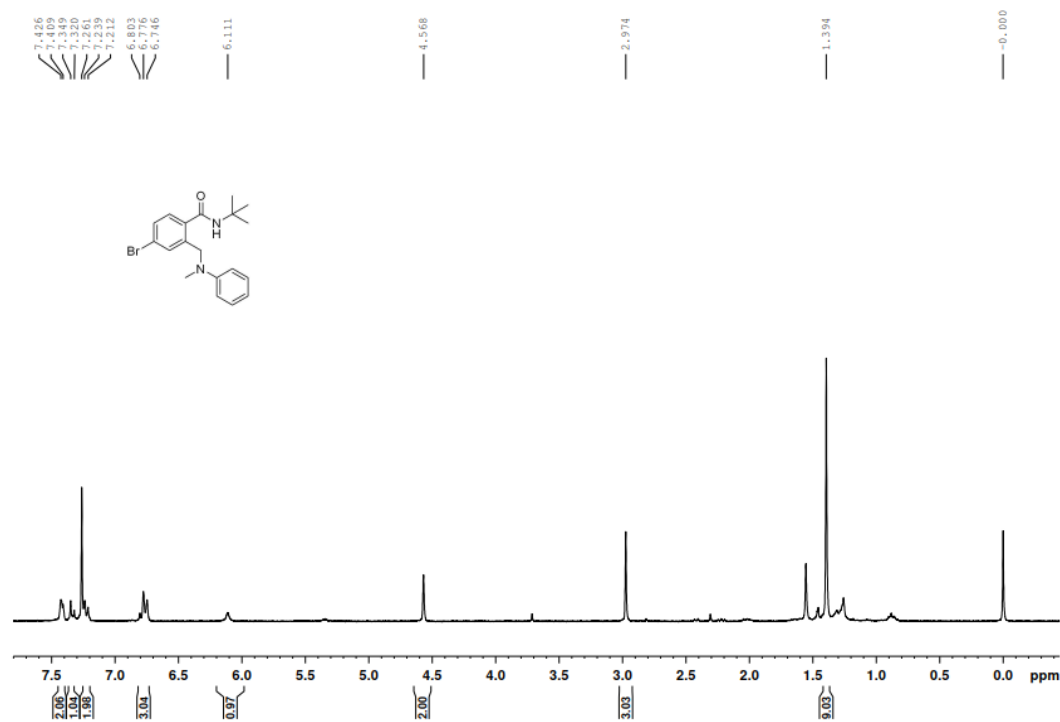

Supplementary Figure 54.  $^1\text{H}$  NMR (300 MHz,  $\text{CDCl}_3$ ) spectra for compound **3o**.

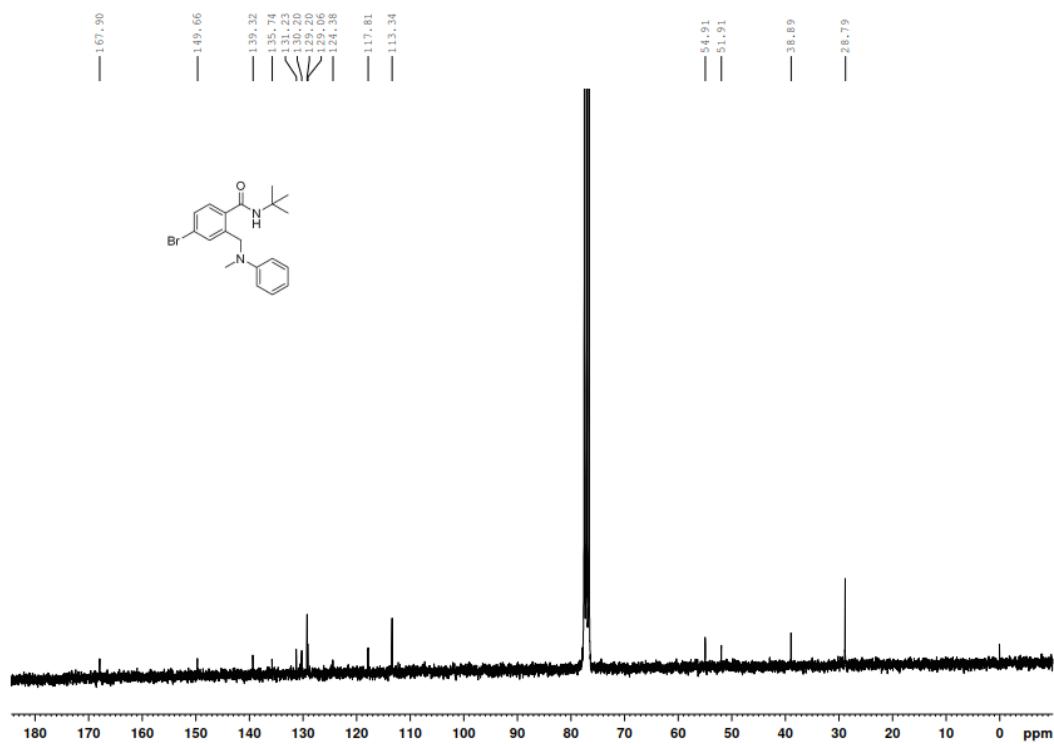

Supplementary Figure 55.  $^{13}\text{C}$  NMR (75 MHz,  $\text{CDCl}_3$ ) spectra for compound **3o**.

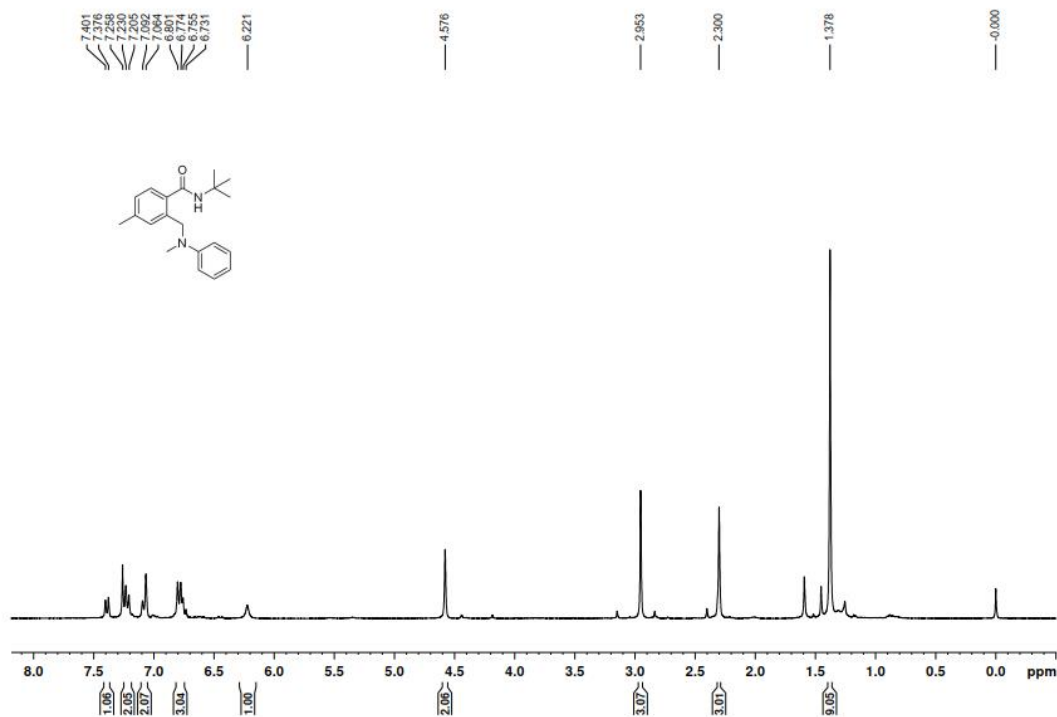

Supplementary Figure 56. <sup>1</sup>H NMR (300 MHz, CDCl<sub>3</sub>) spectra for compound 3p.

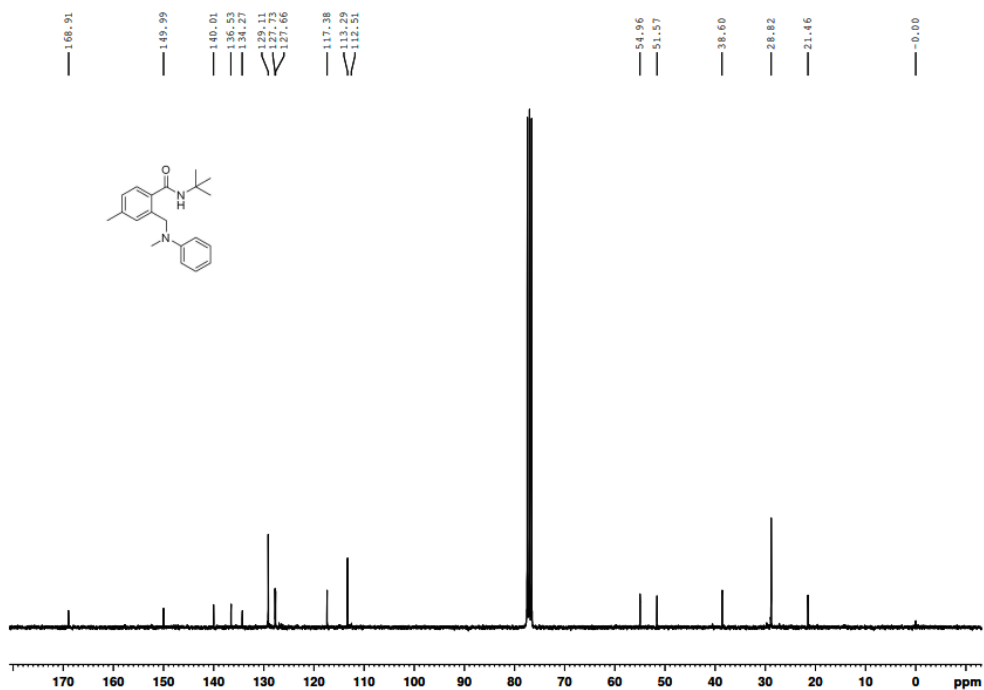

Supplementary Figure 57. <sup>13</sup>C NMR (75 MHz, CDCl<sub>3</sub>) spectra for compound 3p.

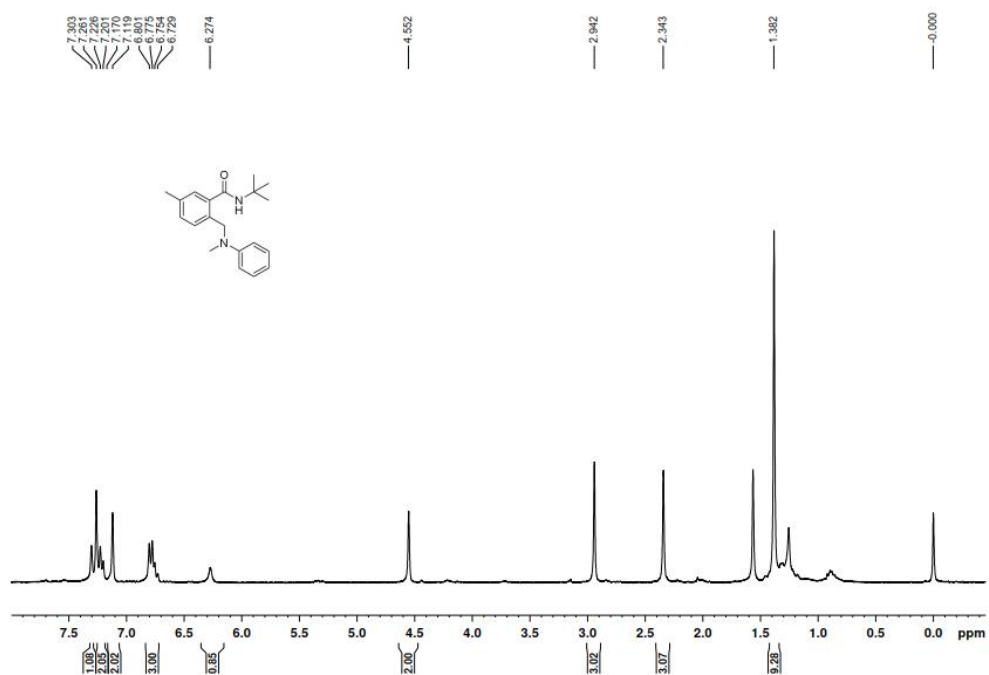

Supplementary Figure 58. <sup>1</sup>H NMR (300 MHz, CDCl<sub>3</sub>) spectra for compound 3q.

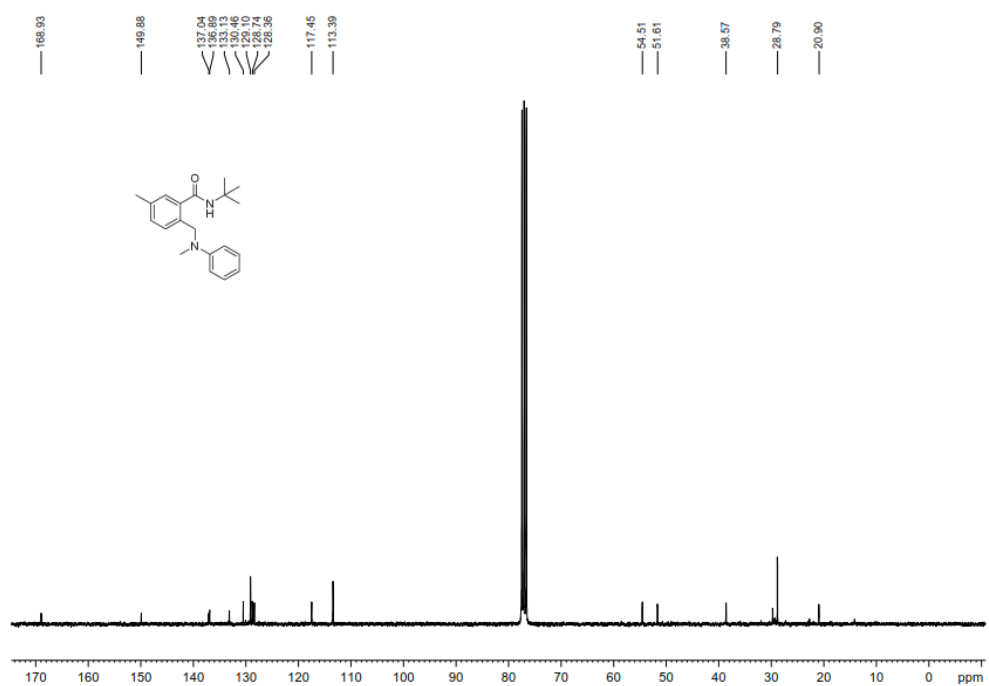

Supplementary Figure 59. <sup>13</sup>C NMR (75 MHz, CDCl<sub>3</sub>) spectra for compound 3q.



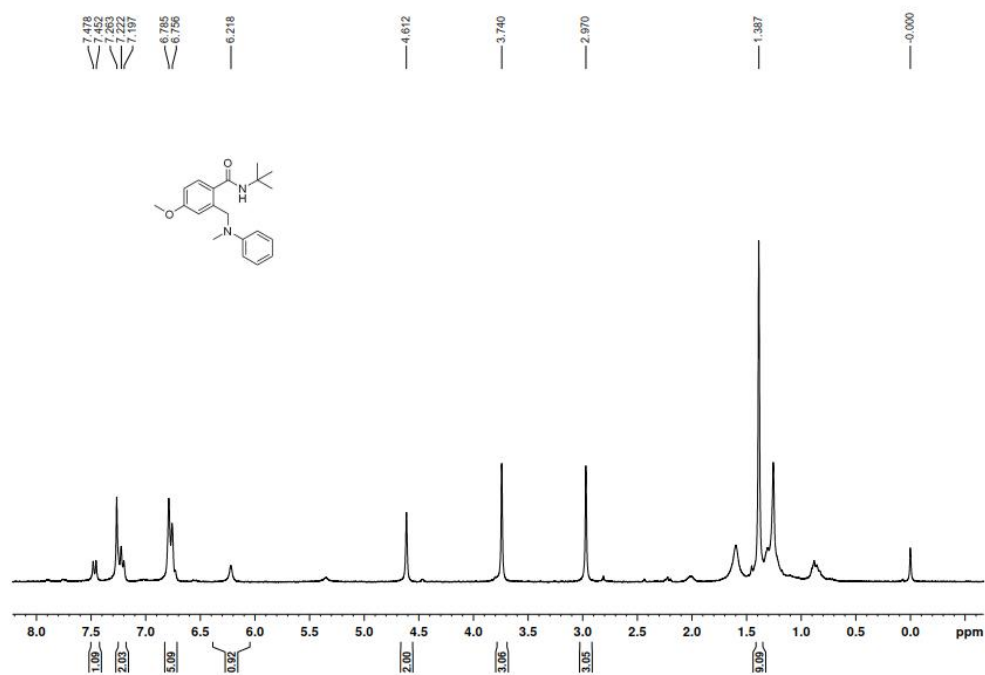

Supplementary Figure 60. <sup>1</sup>H NMR (300 MHz, CDCl<sub>3</sub>) spectra for compound 3r.

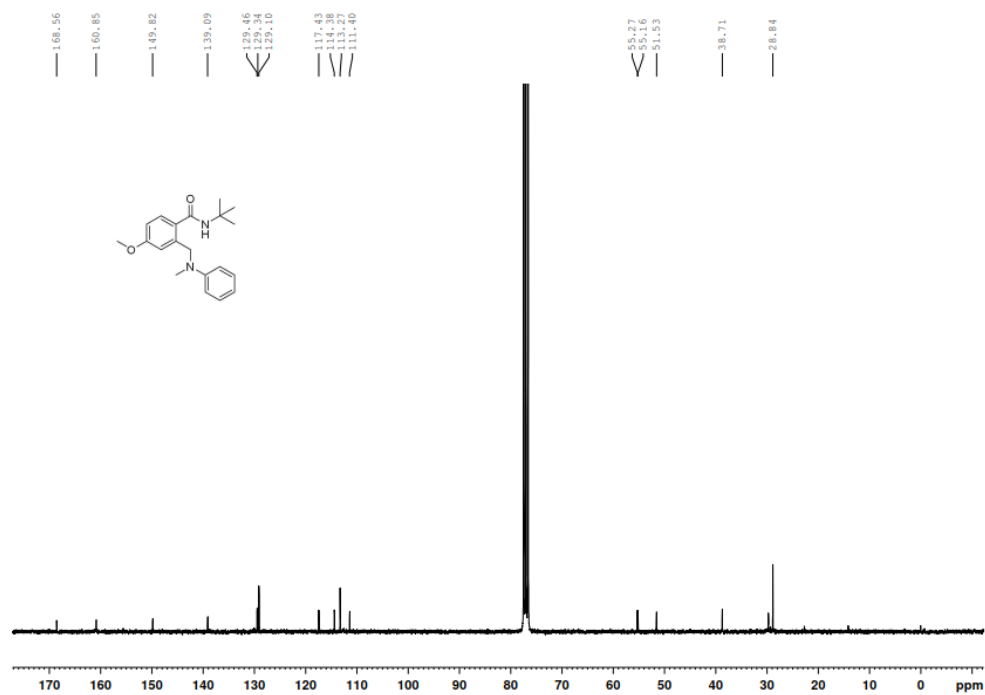

Supplementary Figure 61. <sup>13</sup>C NMR (75 MHz, CDCl<sub>3</sub>) spectra for compound 3r.



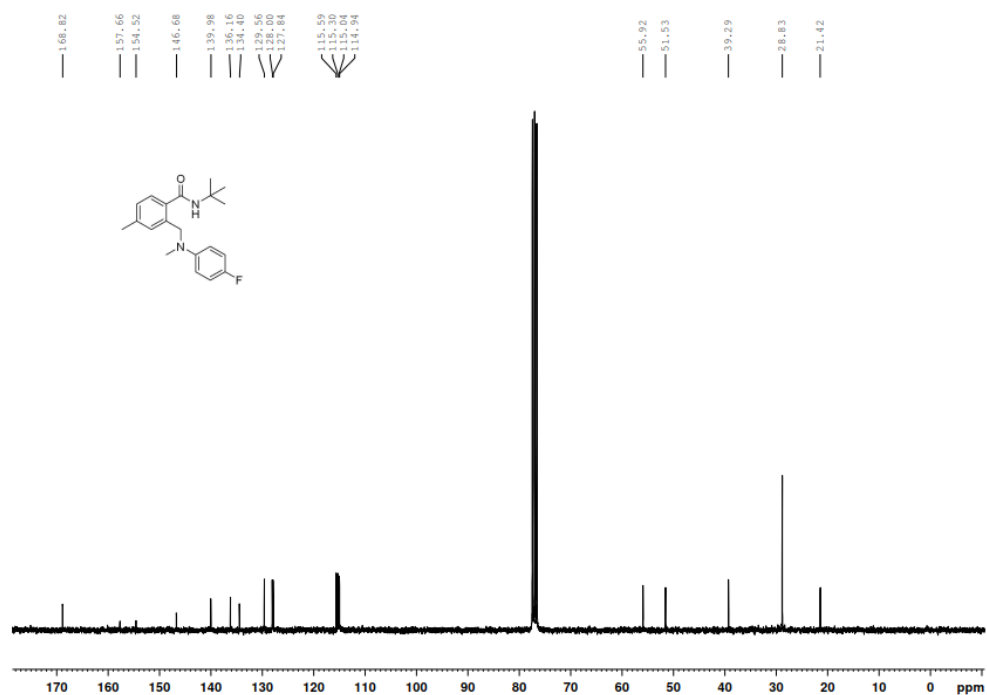

Supplementary Figure 64.  $^{13}\text{C}$  NMR (75 MHz,  $\text{CDCl}_3$ ) spectra for compound 3s.

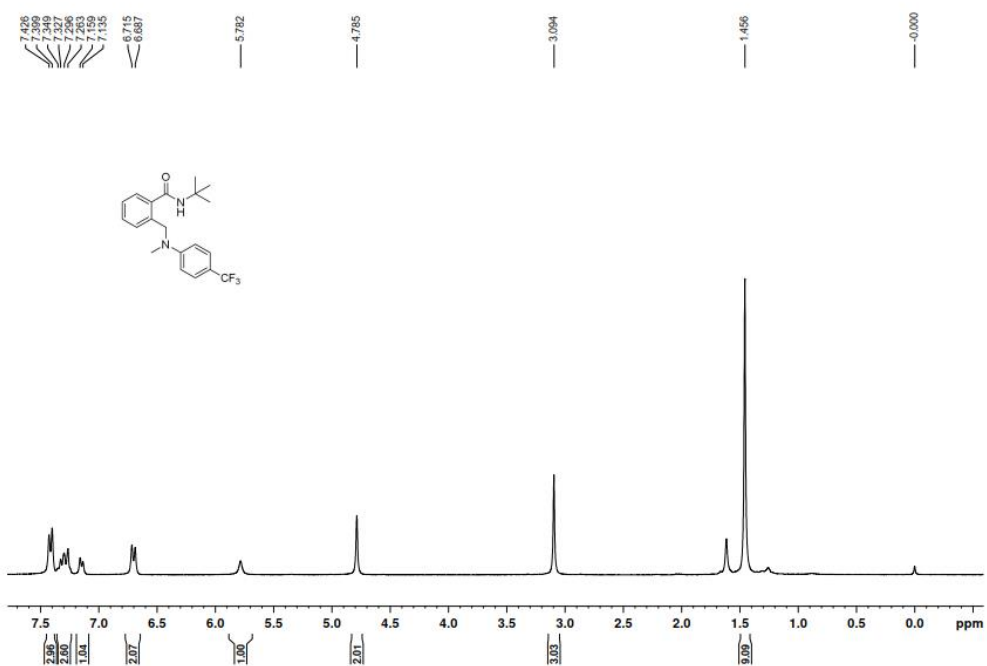

Supplementary Figure 65.  $^1\text{H}$  NMR (300 MHz,  $\text{CDCl}_3$ ) spectra for compound 3t.

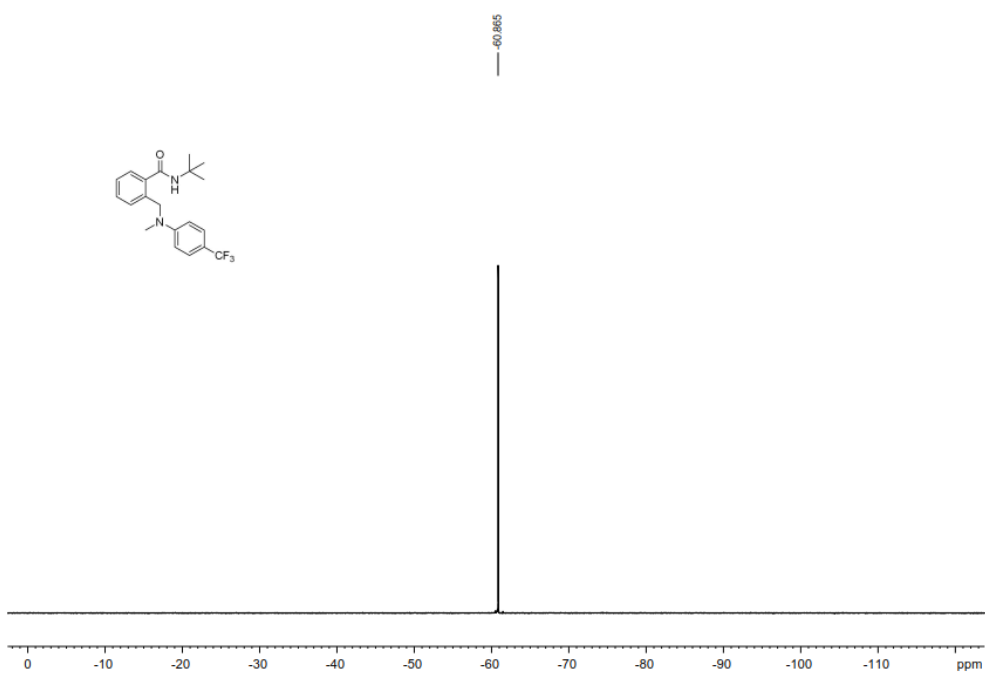

Supplementary Figure 66.  $^{19}\text{F}$  NMR (282 MHz,  $\text{CDCl}_3$ ) spectra for compound 3t.

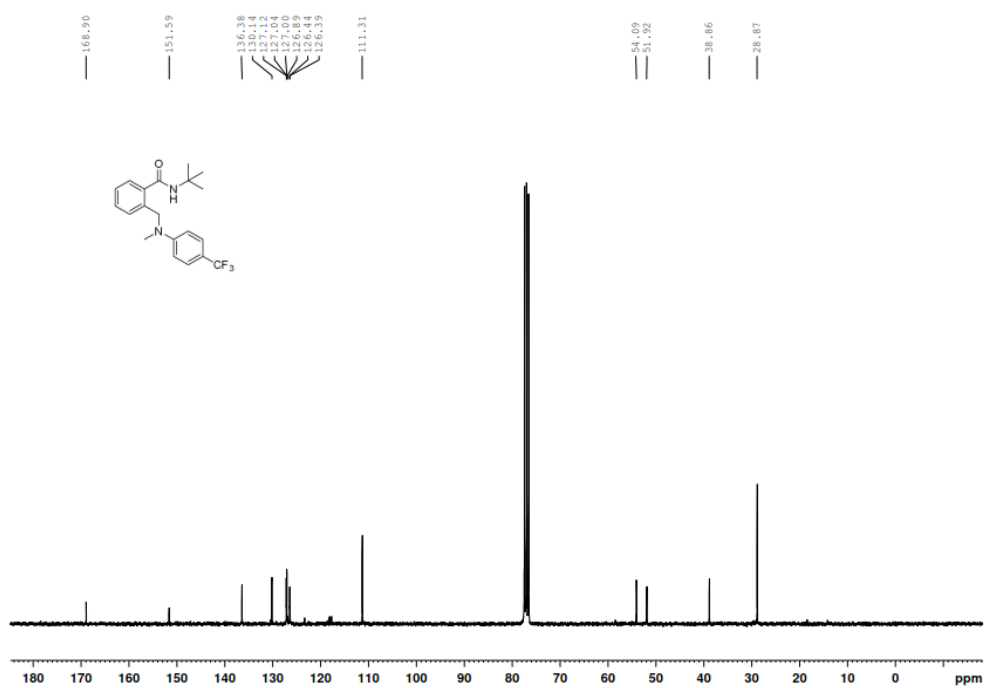

Supplementary Figure 67.  $^{13}\text{C}$  NMR (75 MHz,  $\text{CDCl}_3$ ) spectra for compound 3t.

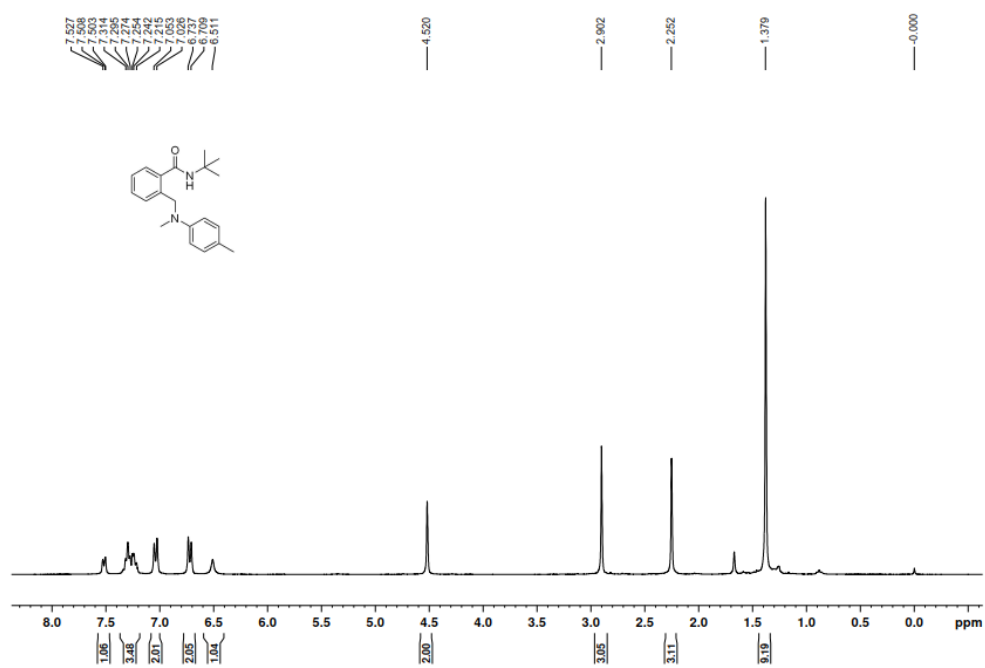

Supplementary Figure 68. <sup>1</sup>H NMR (300 MHz, CDCl<sub>3</sub>) spectra for compound 3u.

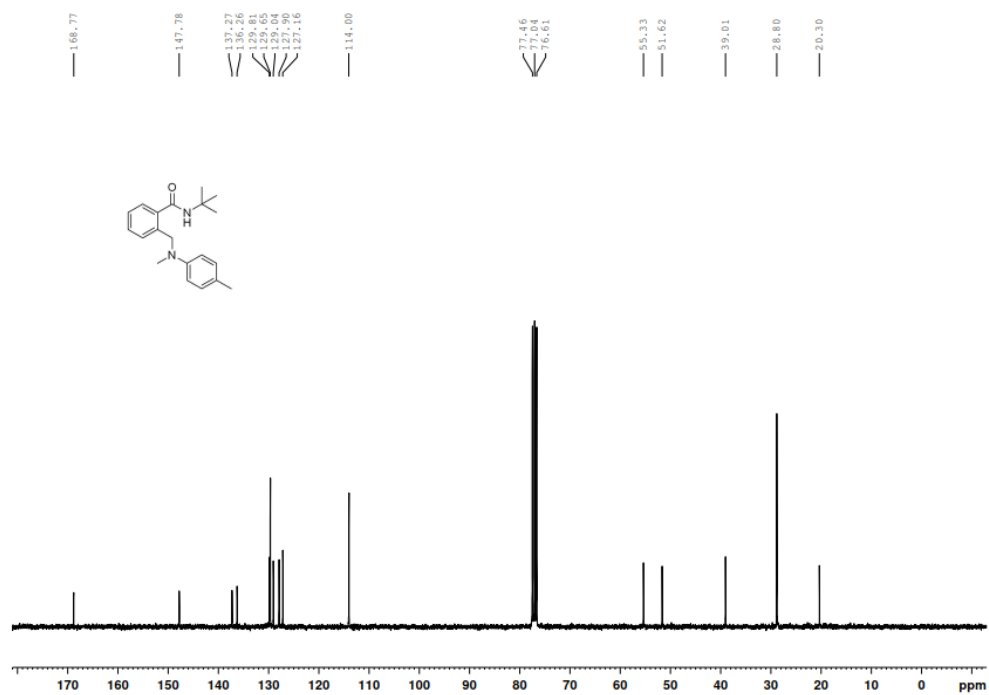

Supplementary Figure 69. <sup>13</sup>C NMR (75 MHz, CDCl<sub>3</sub>) spectra for compound 3u.

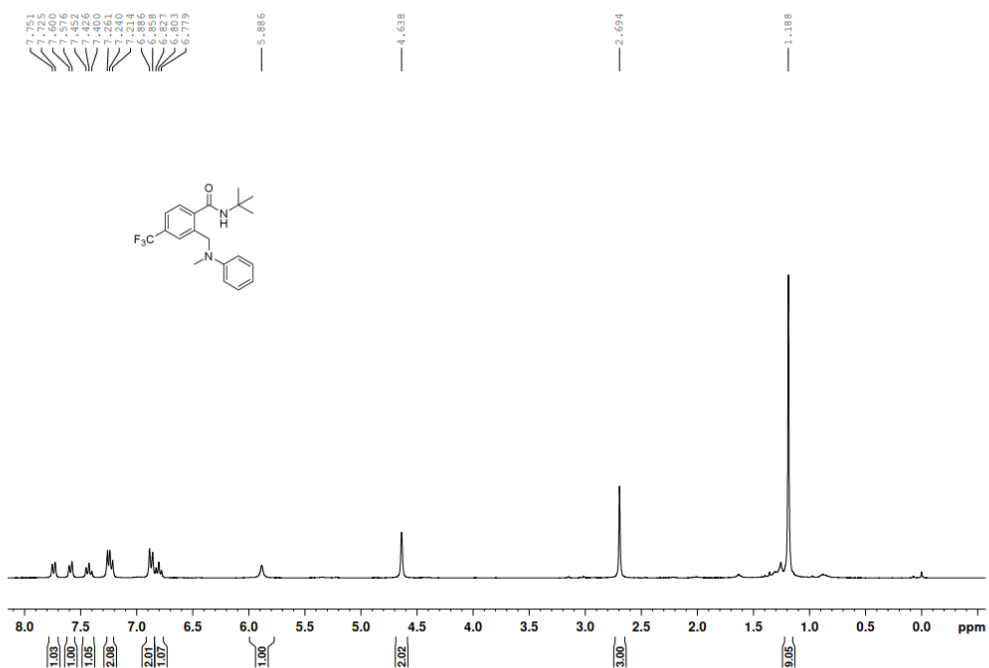

Supplementary Figure 70. <sup>1</sup>H NMR (300 MHz, CDCl<sub>3</sub>) spectra for compound 3v.

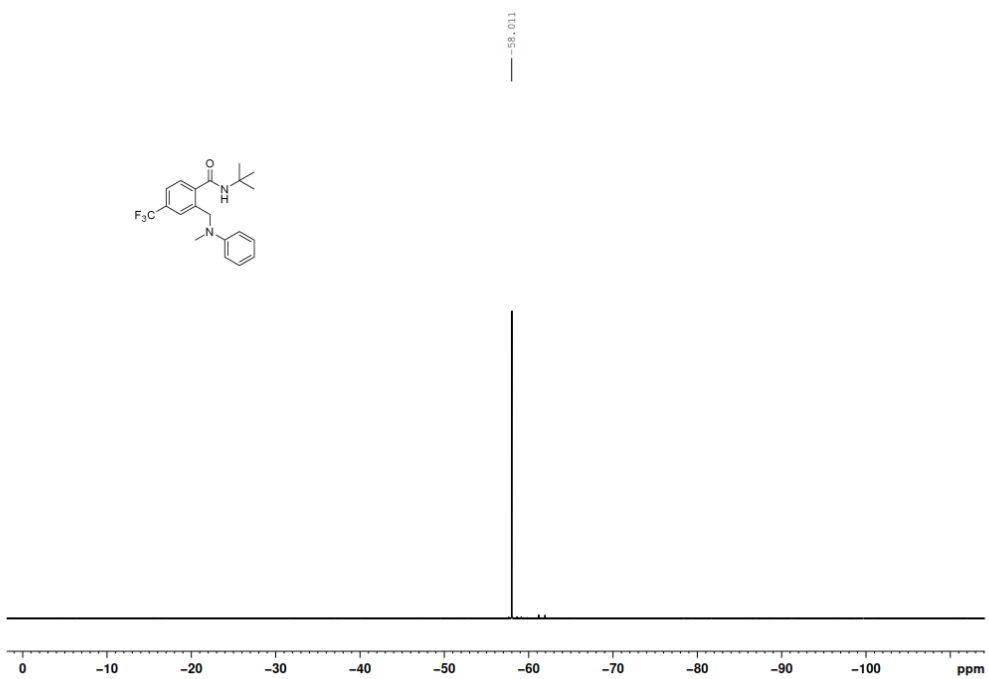

Supplementary Figure 71. <sup>19</sup>F NMR (282 MHz, CDCl<sub>3</sub>) spectra for compound 3v.

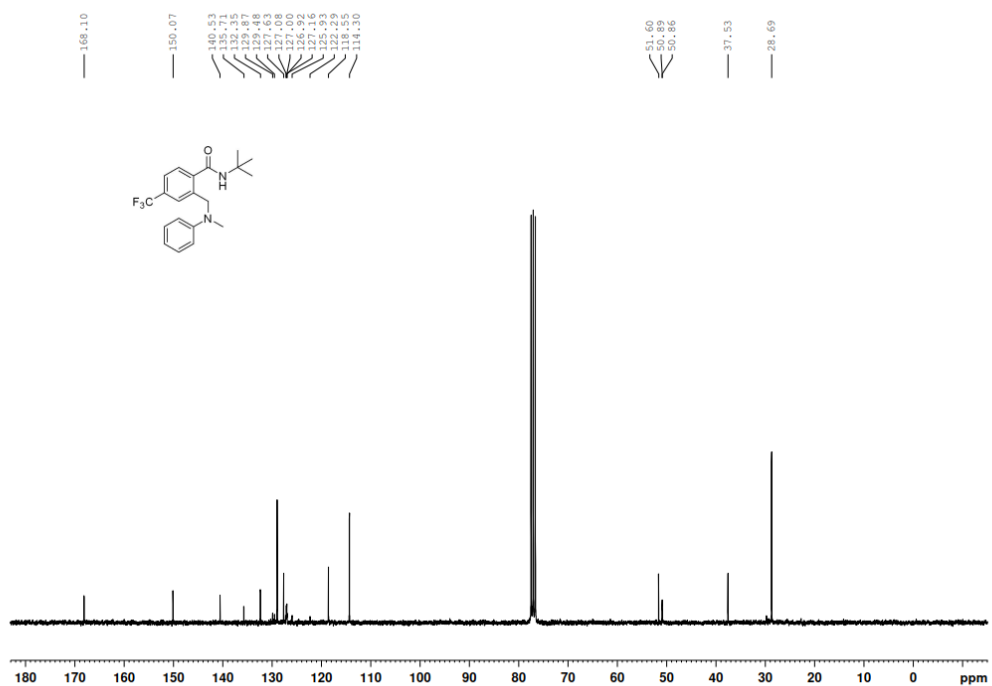

Supplementary Figure 72. <sup>13</sup>C NMR (75 MHz, CDCl<sub>3</sub>) spectra for compound 3v.

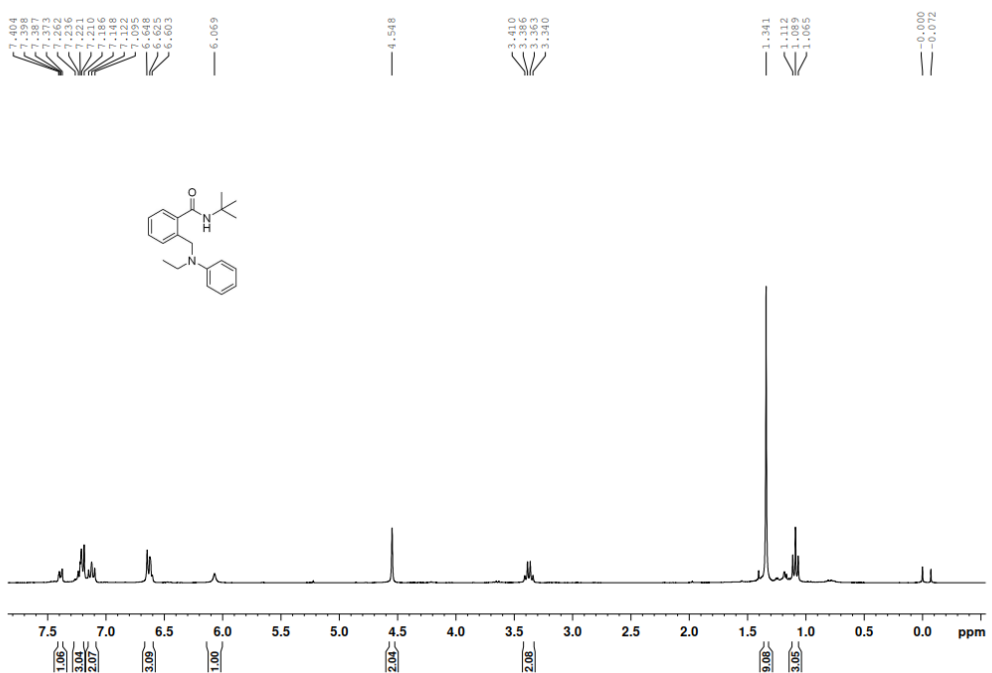

Supplementary Figure 73. <sup>1</sup>H NMR (300 MHz, CDCl<sub>3</sub>) spectra for compound 3w.

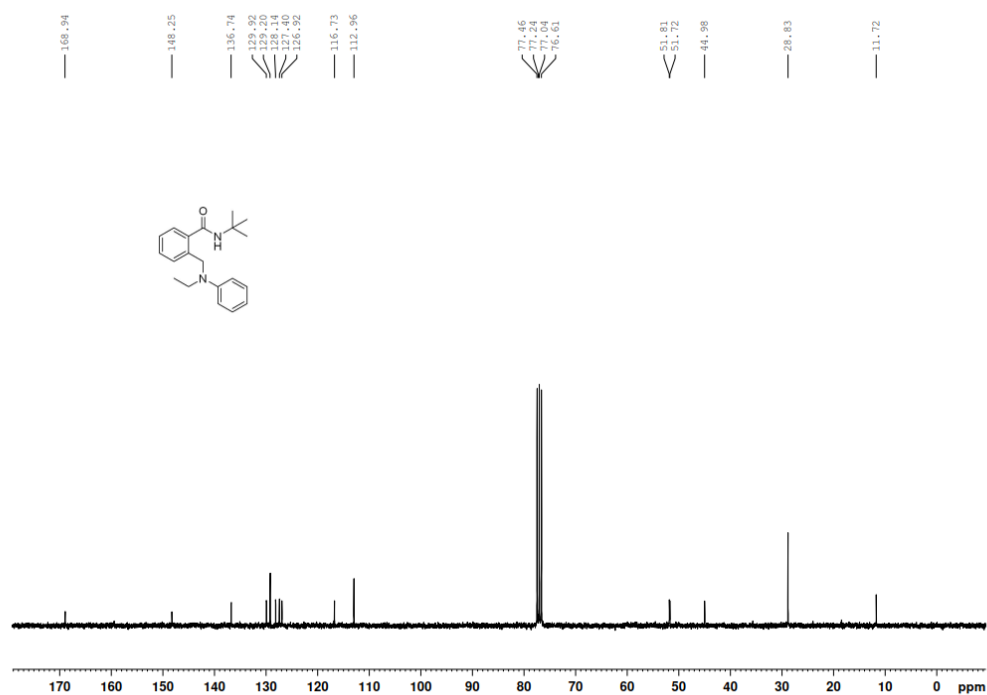

Supplementary Figure 74. <sup>13</sup>C NMR (75 MHz, CDCl<sub>3</sub>) spectra for compound 3w.

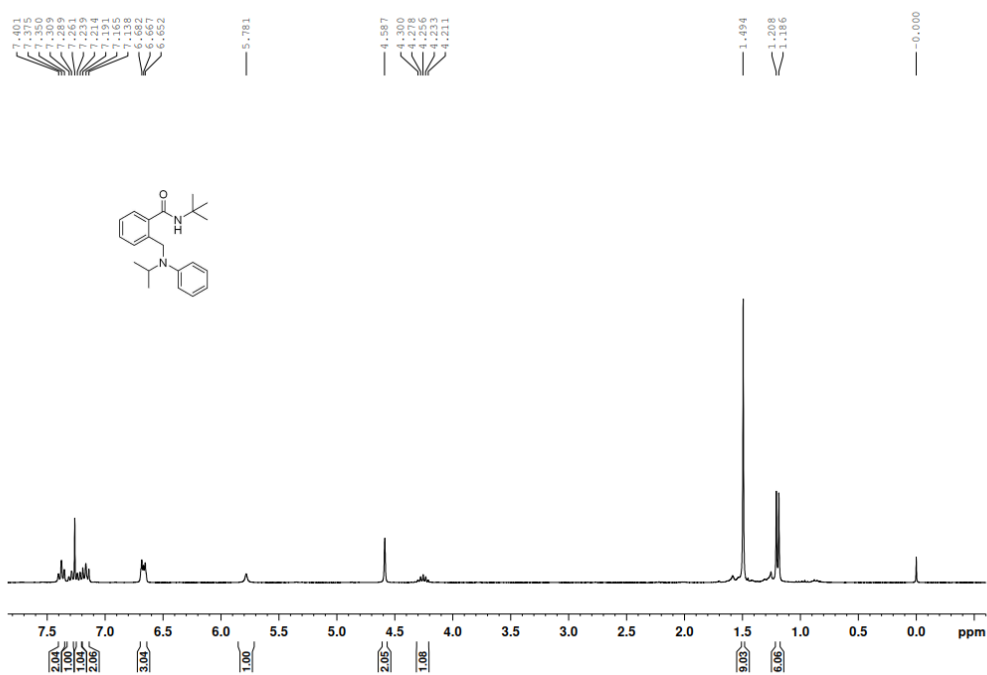

Supplementary Figure 75. <sup>1</sup>H NMR (300 MHz, CDCl<sub>3</sub>) spectra for compound 3x.



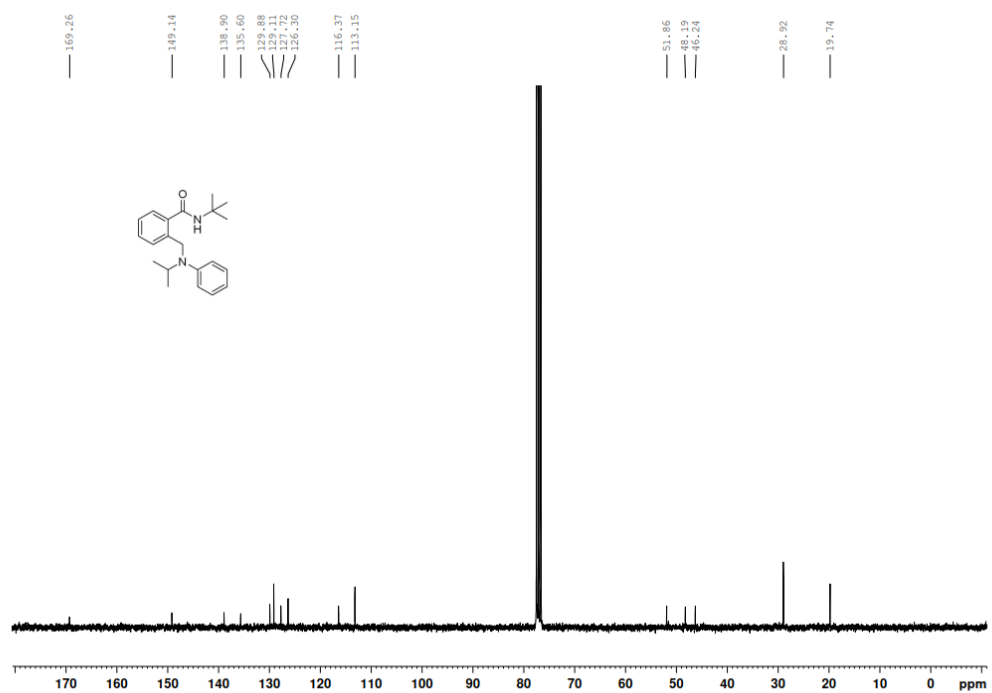

Supplementary Figure 76. <sup>13</sup>C NMR (75 MHz, CDCl<sub>3</sub>) spectra for compound 3x.

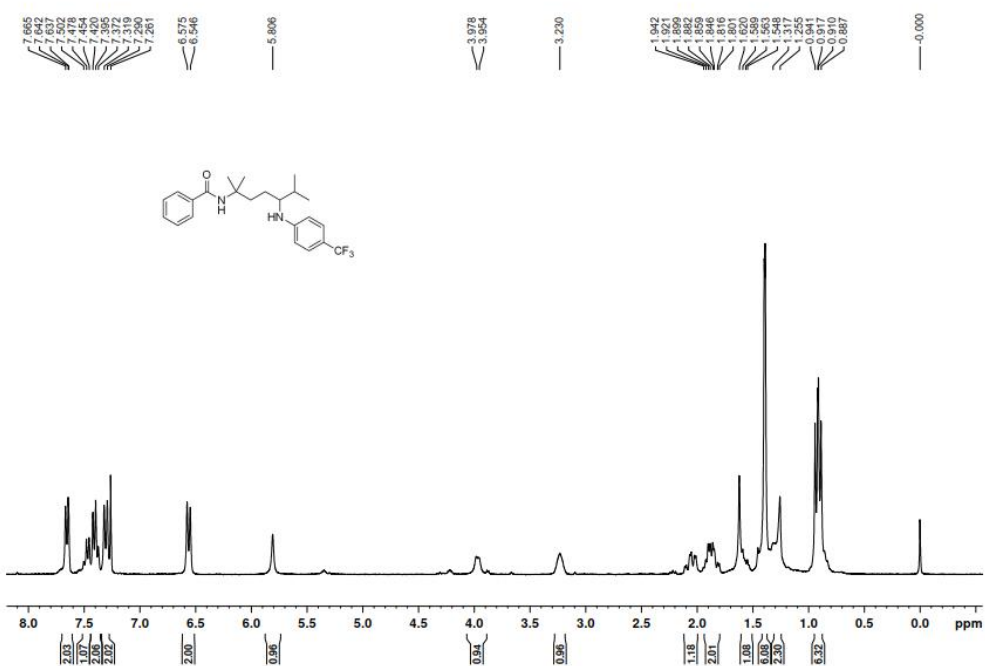

Supplementary Figure 77. <sup>1</sup>H NMR (300 MHz, CDCl<sub>3</sub>) spectra for compound 3y.

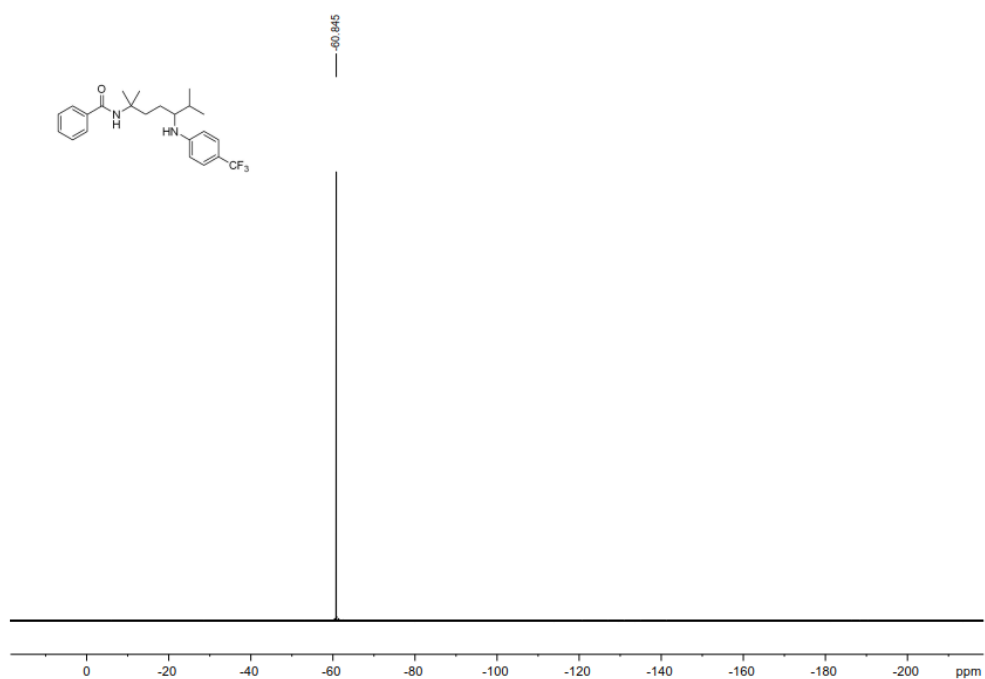

Supplementary Figure 78.  $^{19}\text{F}$  NMR (282 MHz,  $\text{CDCl}_3$ ) spectra for compound 3y.

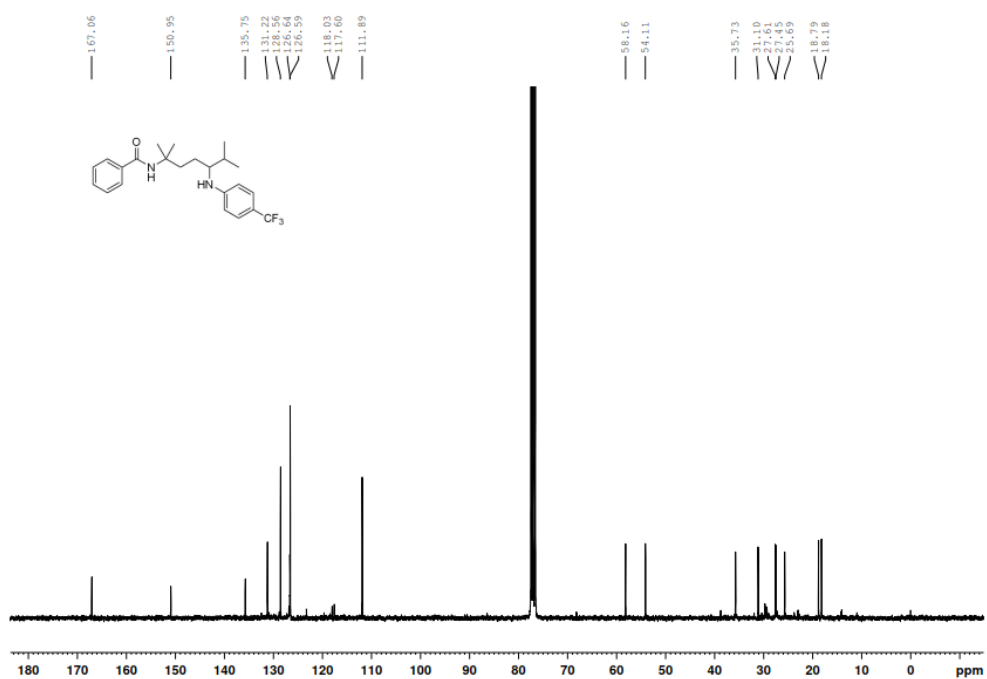

Supplementary Figure 79.  $^{13}\text{C}$  NMR (75 MHz,  $\text{CDCl}_3$ ) spectra for compound 3y.

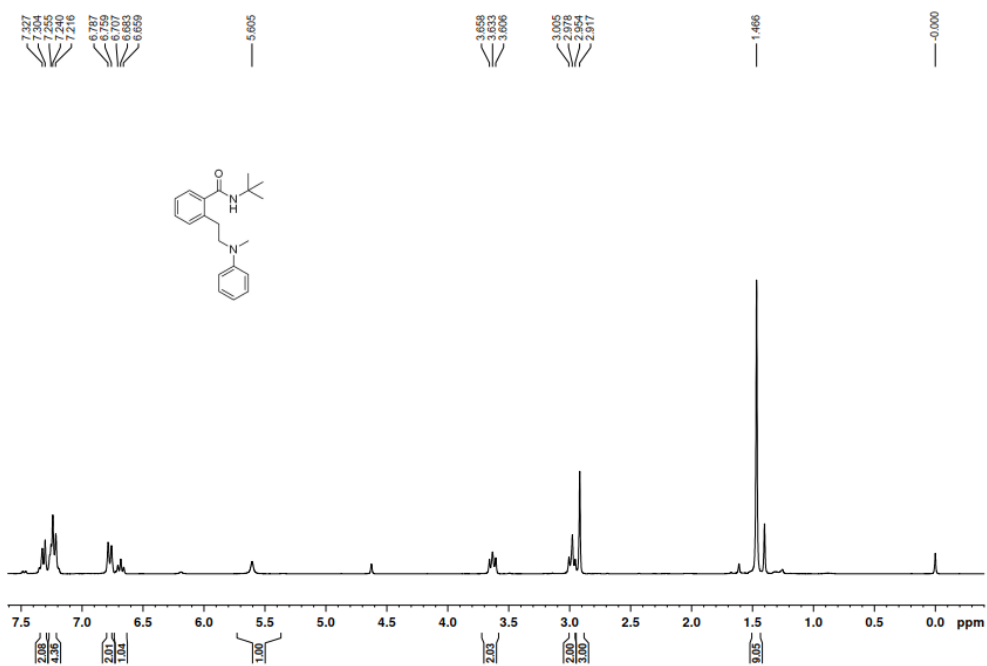

Supplementary Figure 80. <sup>1</sup>H NMR (300 MHz, CDCl<sub>3</sub>) spectra for compound 4a.

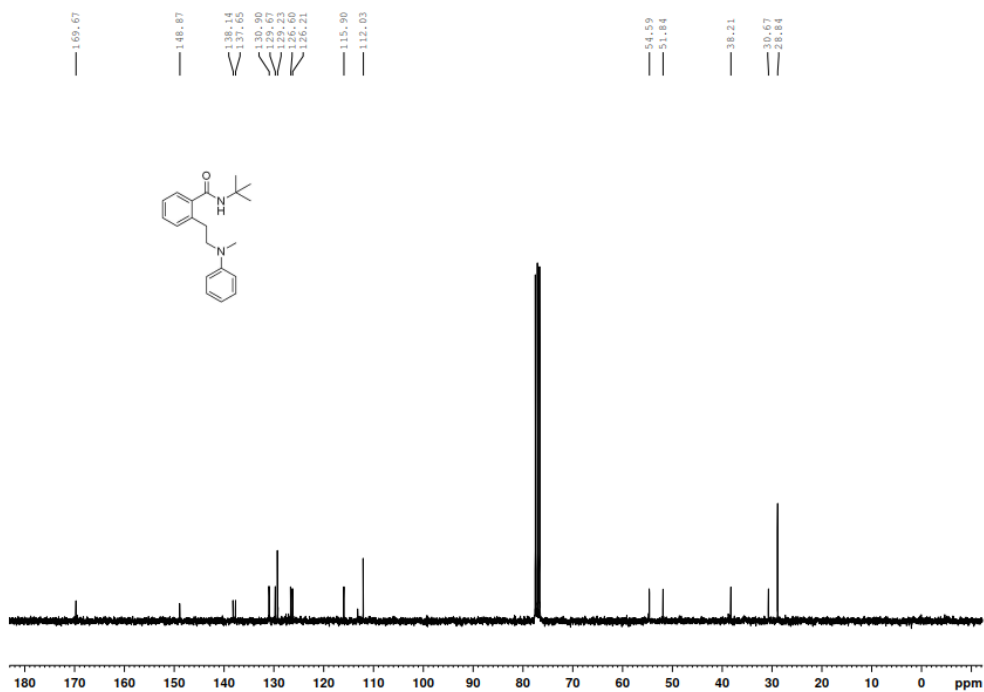

Supplementary Figure 81. <sup>13</sup>C NMR (75 MHz, CDCl<sub>3</sub>) spectra for compound 4a.

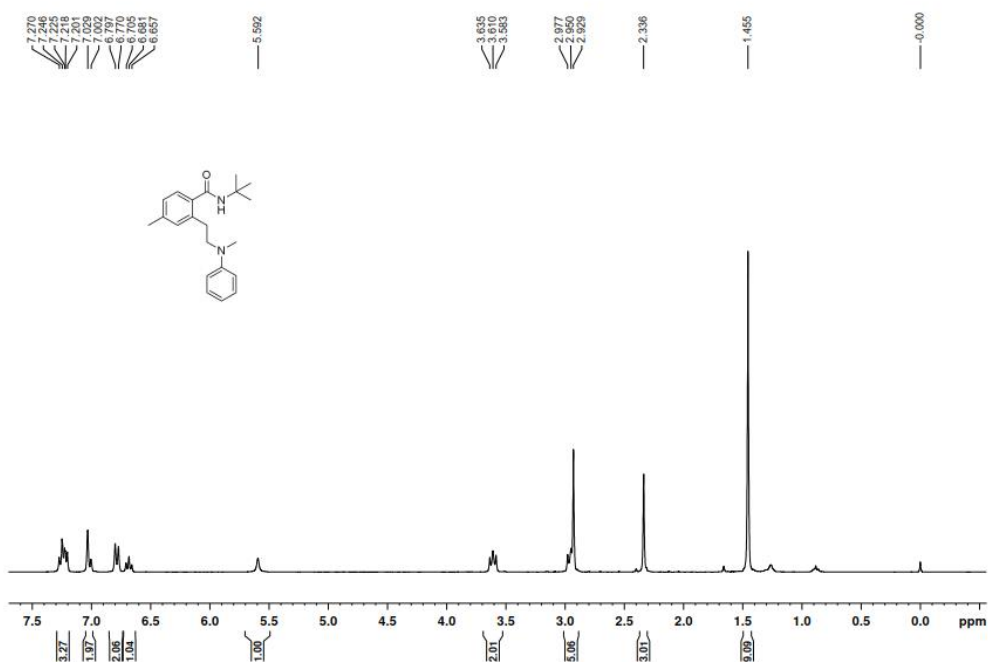

Supplementary Figure 82. <sup>1</sup>H NMR (300 MHz, CDCl<sub>3</sub>) spectra for compound 4b.

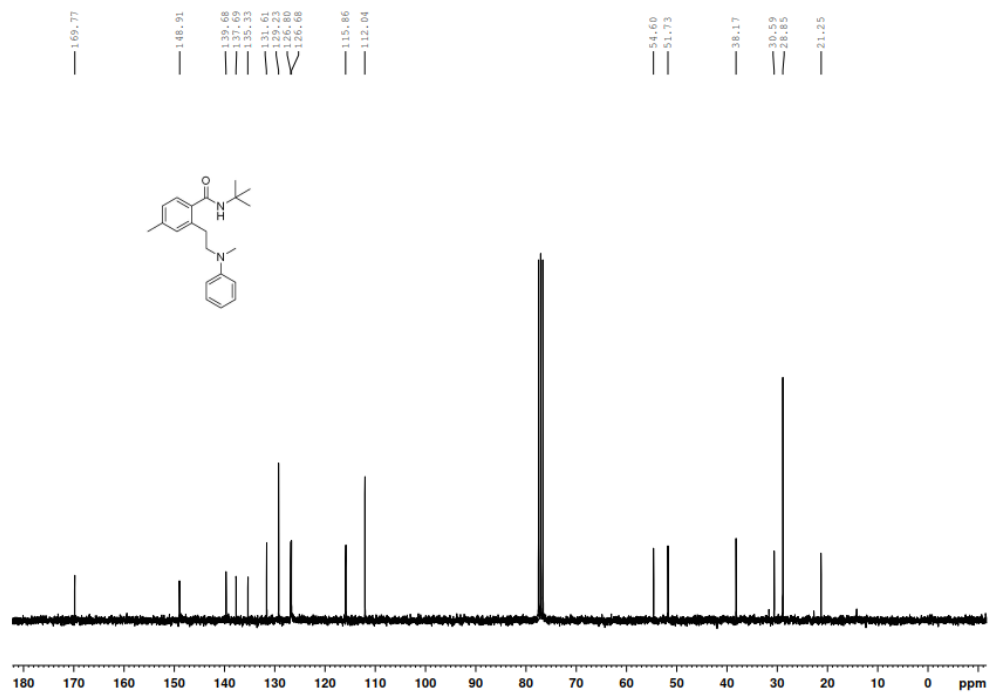

Supplementary Figure 83. <sup>13</sup>C NMR (75 MHz, CDCl<sub>3</sub>) spectra for compound 4b.

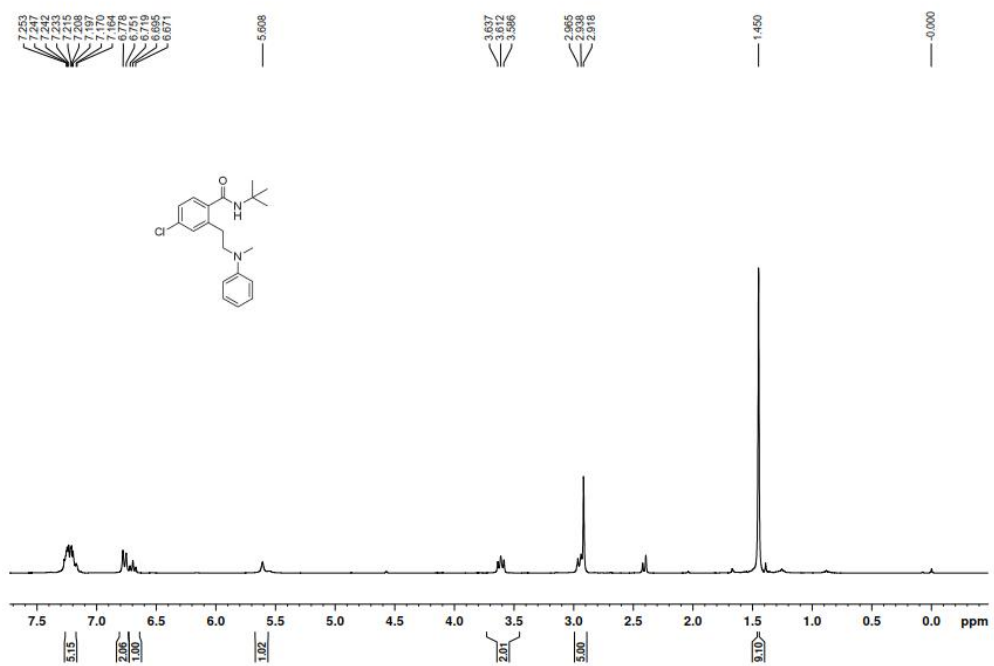

Supplementary Figure 84. <sup>1</sup>H NMR (300 MHz, CDCl<sub>3</sub>) spectra for compound 4c.

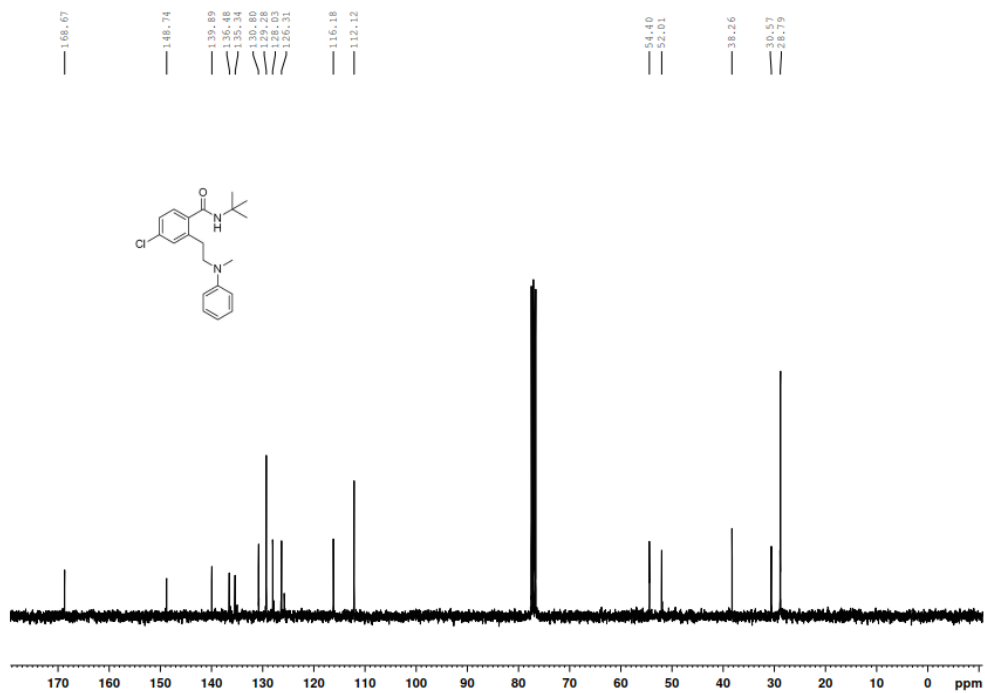

Supplementary Figure 85. <sup>13</sup>C NMR (75 MHz, CDCl<sub>3</sub>) spectra for compound 4c.

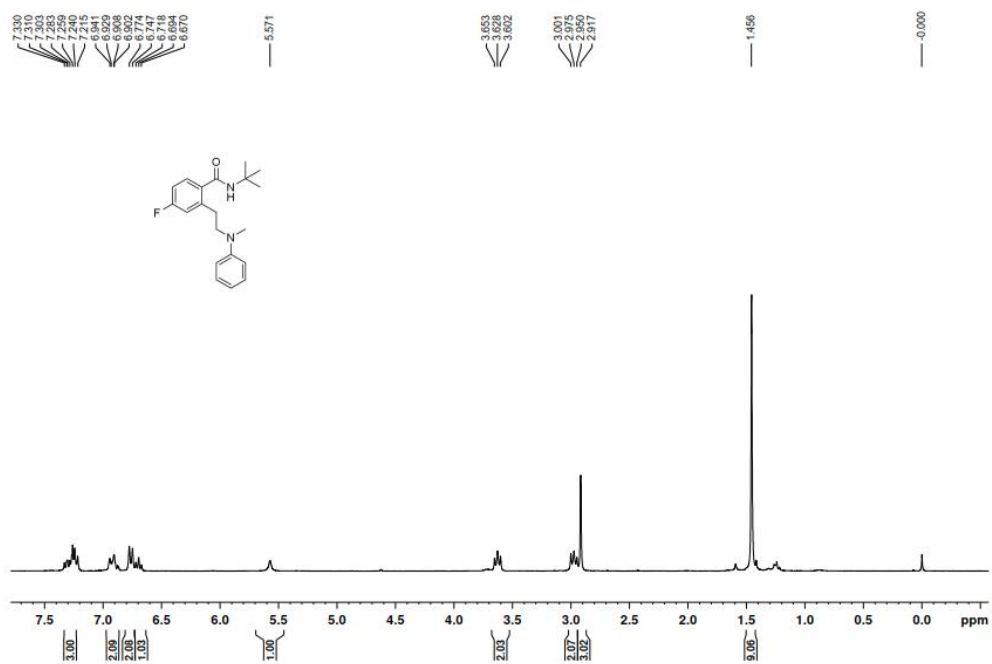

Supplementary Figure 86. <sup>1</sup>H NMR (300 MHz, CDCl<sub>3</sub>) spectra for compound 4d.

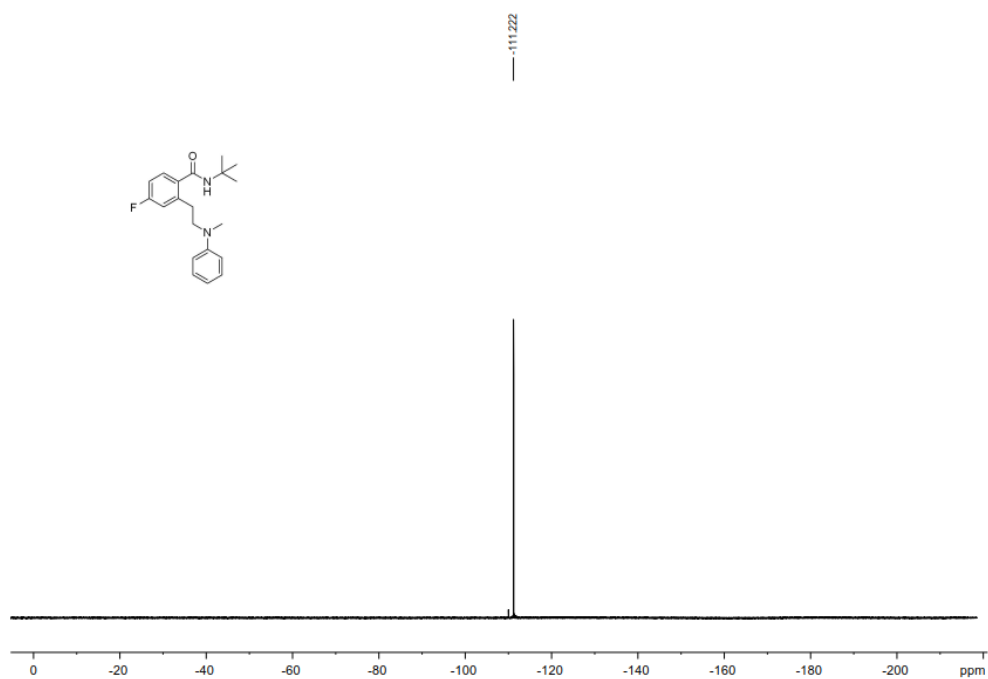

Supplementary Figure 87. <sup>19</sup>F NMR (282 MHz, CDCl<sub>3</sub>) spectra for compound 4d.

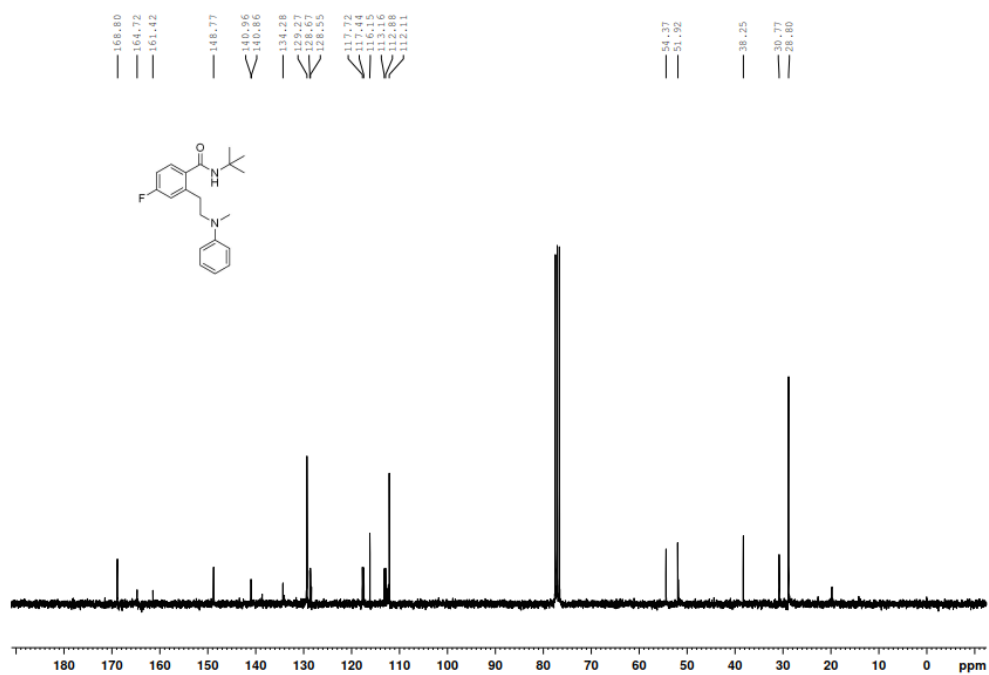

Supplementary Figure 88. <sup>13</sup>C NMR (75 MHz, CDCl<sub>3</sub>) spectra for compound 4d.

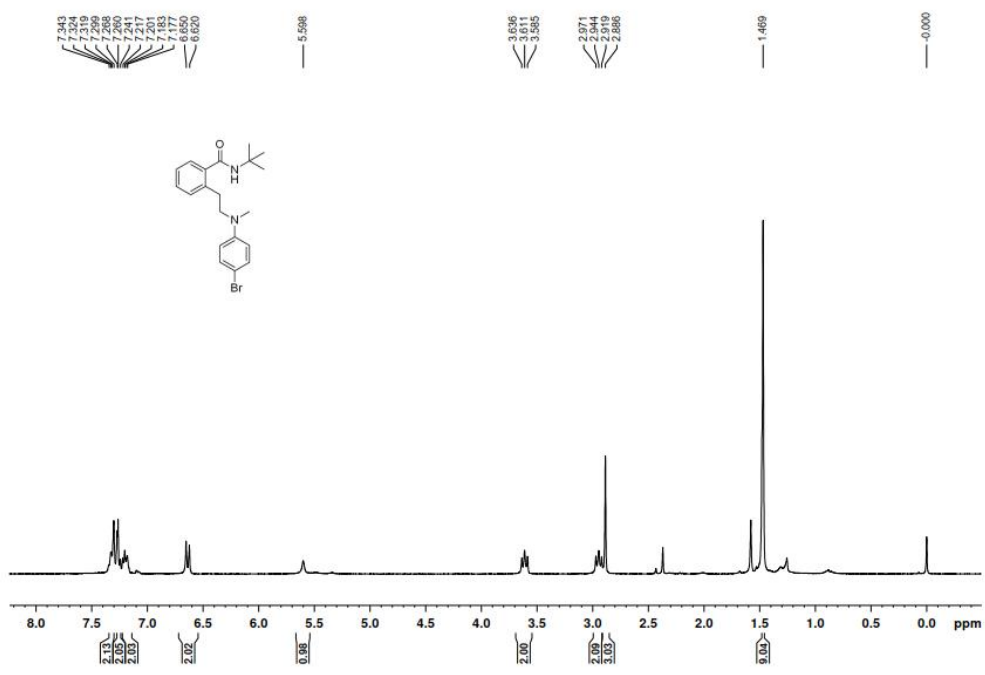

Supplementary Figure 89. <sup>1</sup>H NMR (300 MHz, CDCl<sub>3</sub>) spectra for compound 4e.

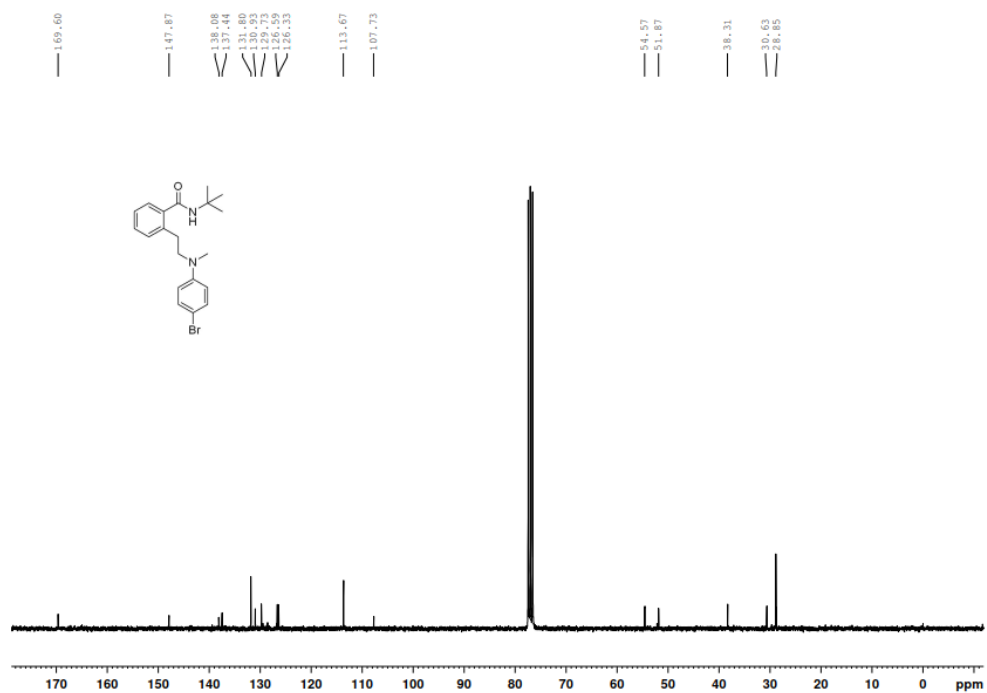

Supplementary Figure 90. <sup>13</sup>C NMR (75 MHz, CDCl<sub>3</sub>) spectra for compound 4e.

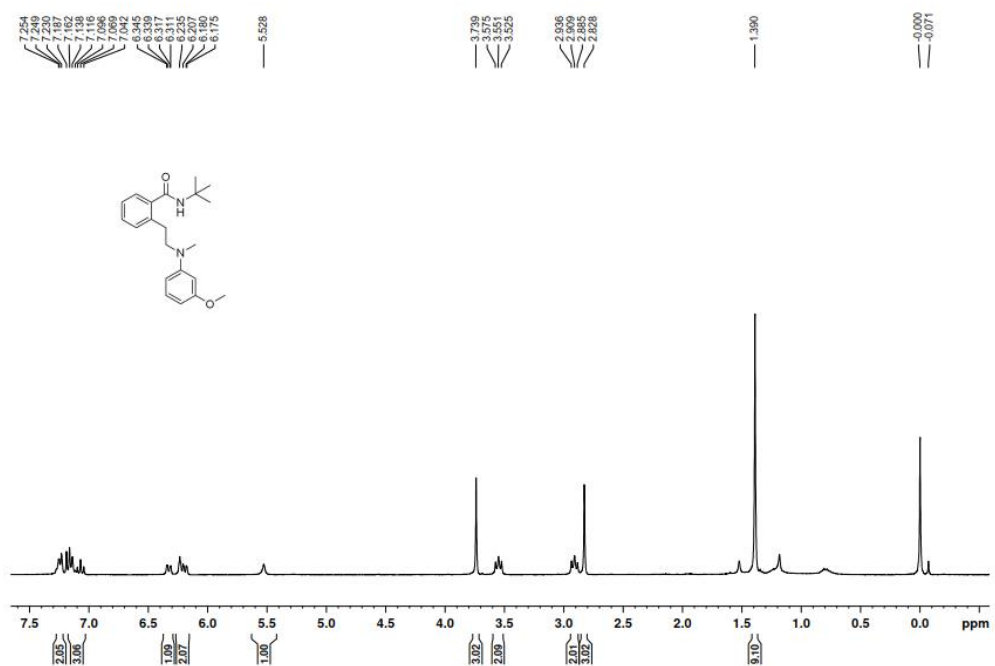

Supplementary Figure 91. <sup>1</sup>H NMR (300 MHz, CDCl<sub>3</sub>) spectra for compound 4f.



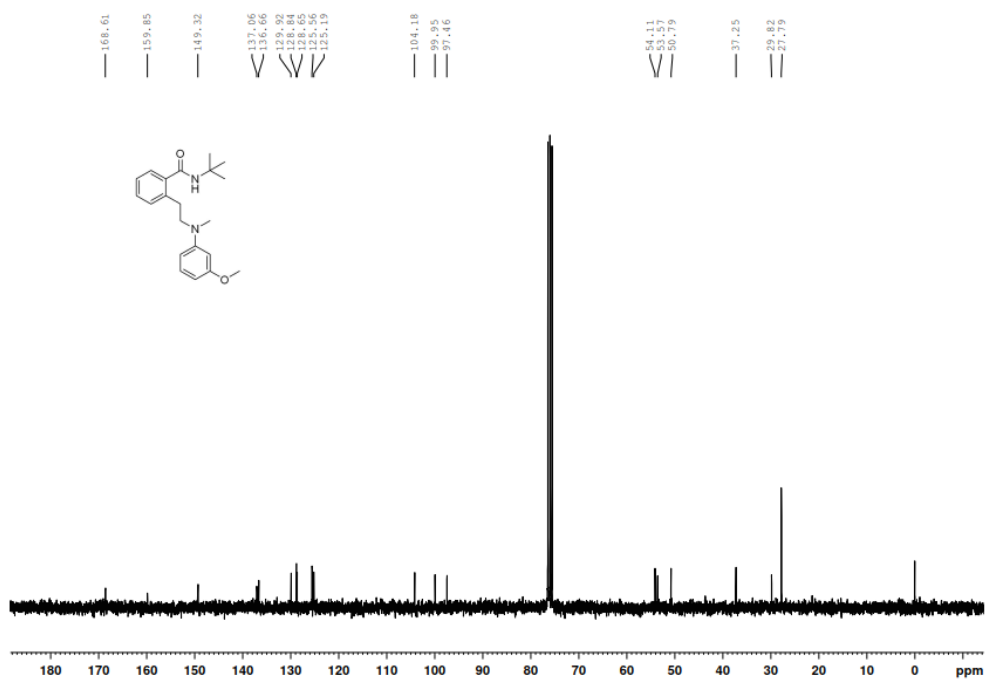

Supplementary Figure 92. <sup>13</sup>C NMR (75 MHz, CDCl<sub>3</sub>) spectra for compound 4f.

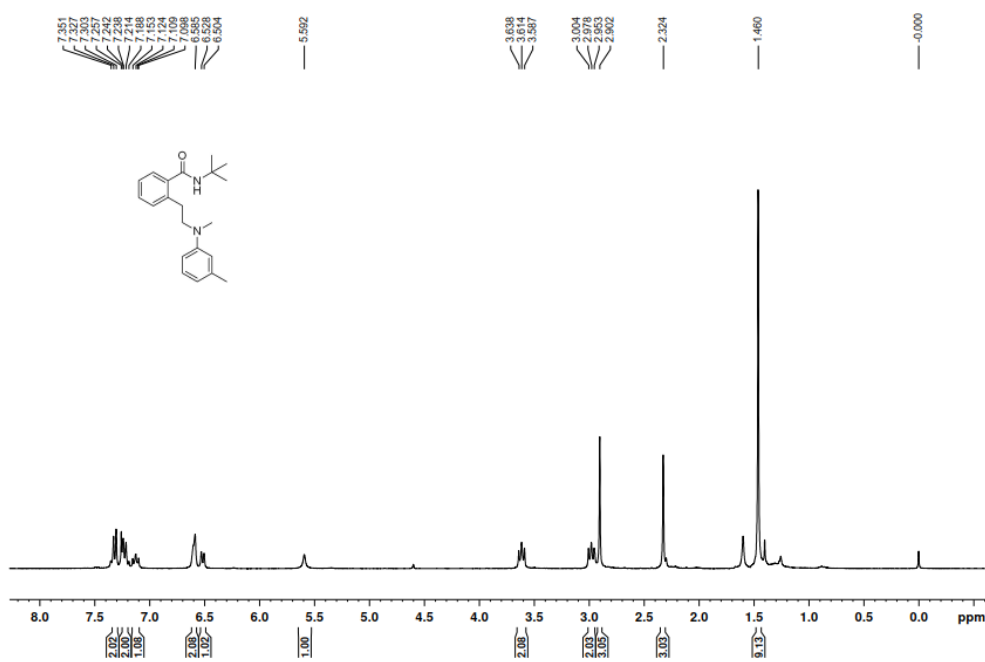

Supplementary Figure 93. <sup>1</sup>H NMR (300 MHz, CDCl<sub>3</sub>) spectra for compound 4g.

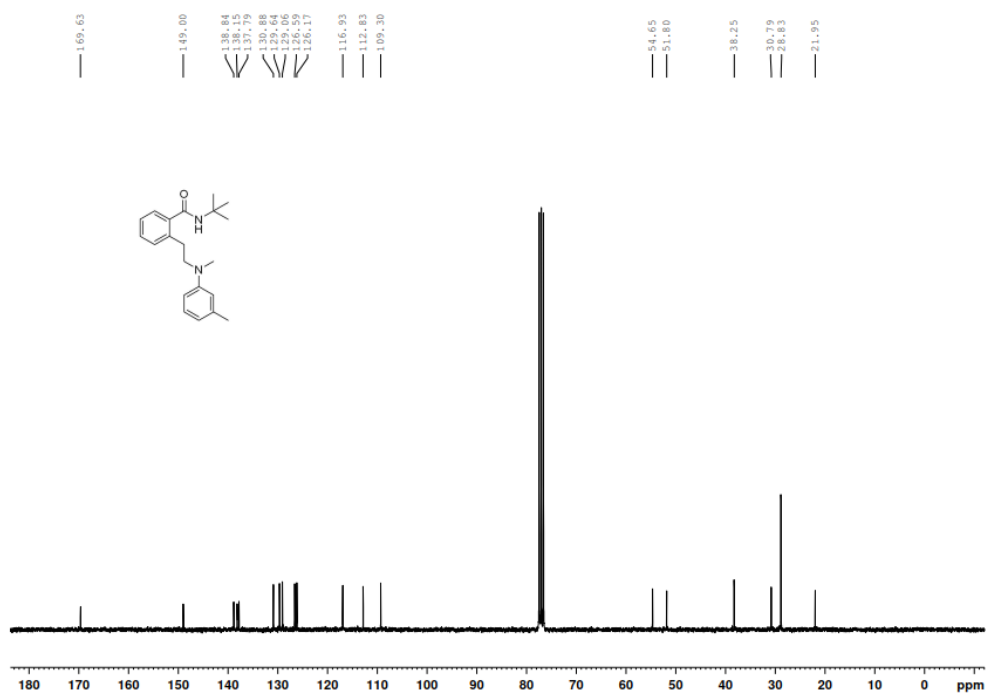

Supplementary Figure 94. <sup>13</sup>C NMR (75 MHz, CDCl<sub>3</sub>) spectra for compound 4g.

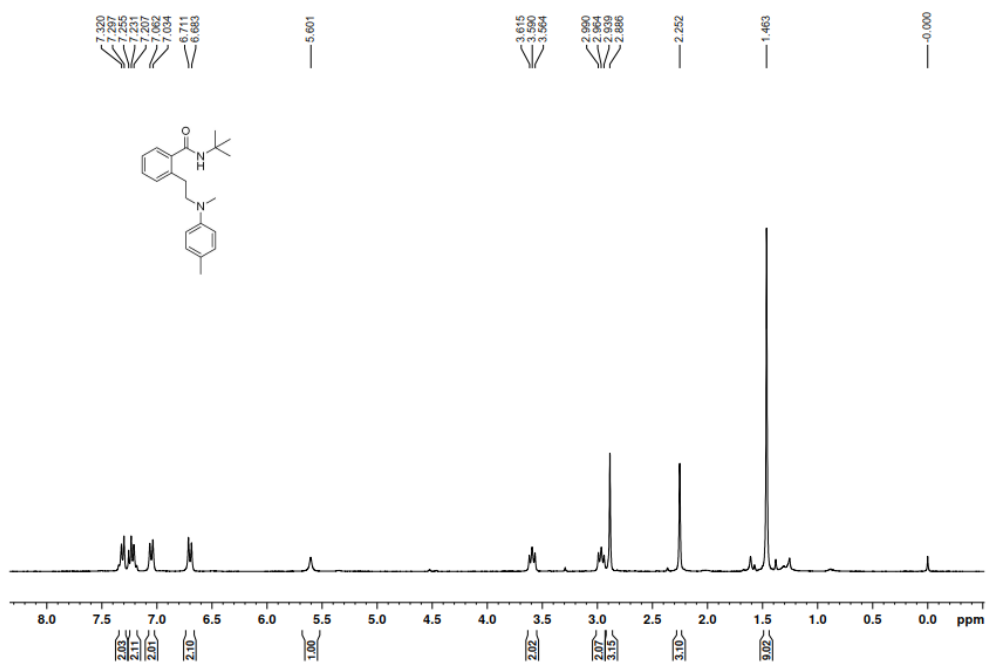

Supplementary Figure 95. <sup>1</sup>H NMR (300 MHz, CDCl<sub>3</sub>) spectra for compound 4h.

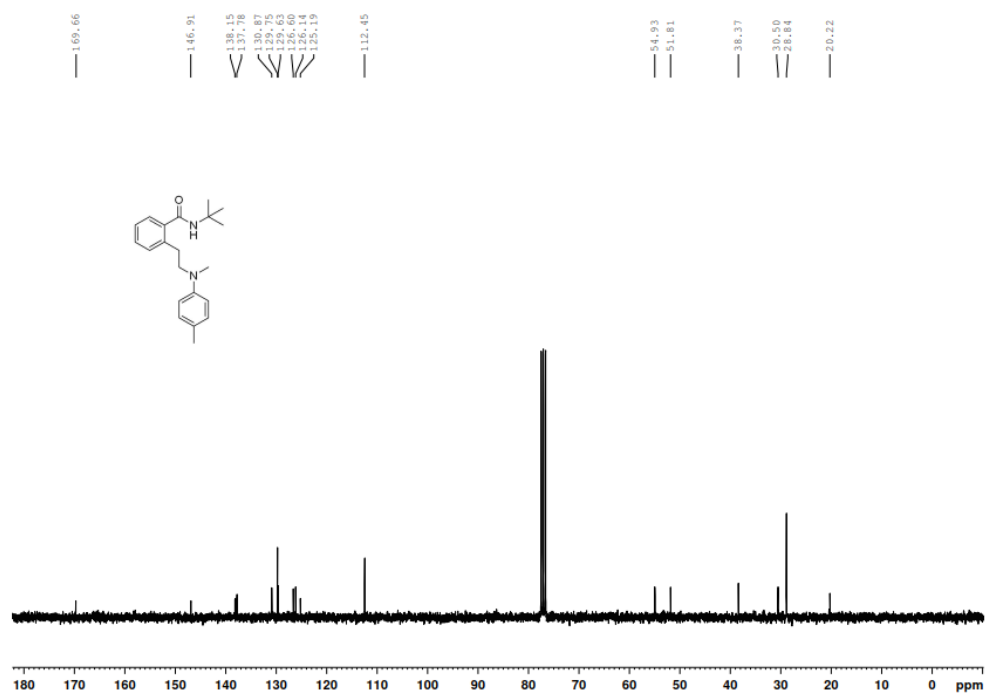

Supplementary Figure 96. <sup>13</sup>C NMR (75 MHz, CDCl<sub>3</sub>) spectra for compound 4h.

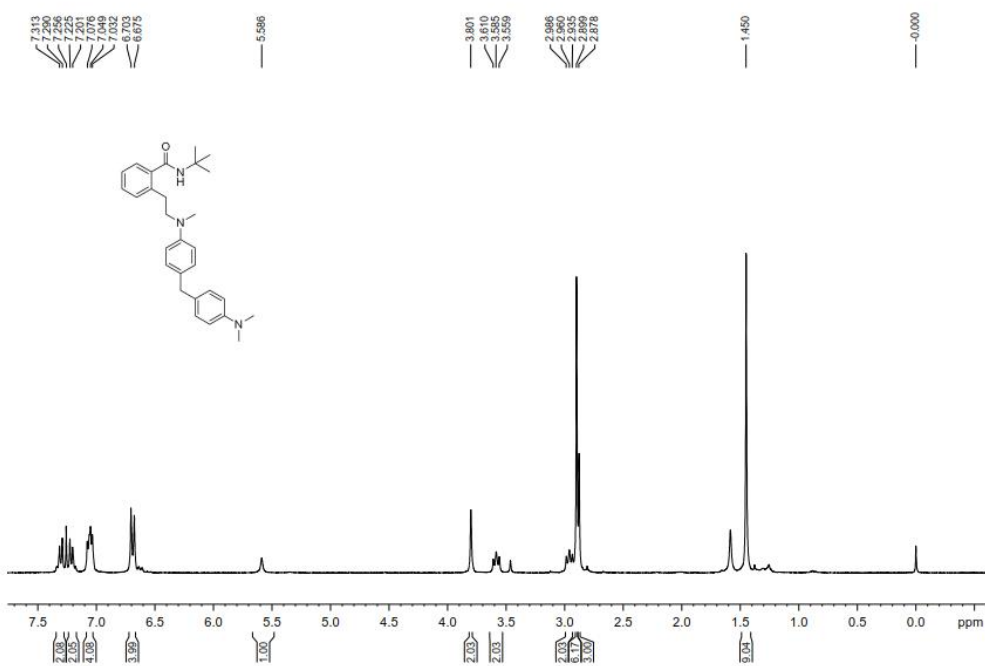

Supplementary Figure 97. <sup>1</sup>H NMR (300 MHz, CDCl<sub>3</sub>) spectra for compound 4i.

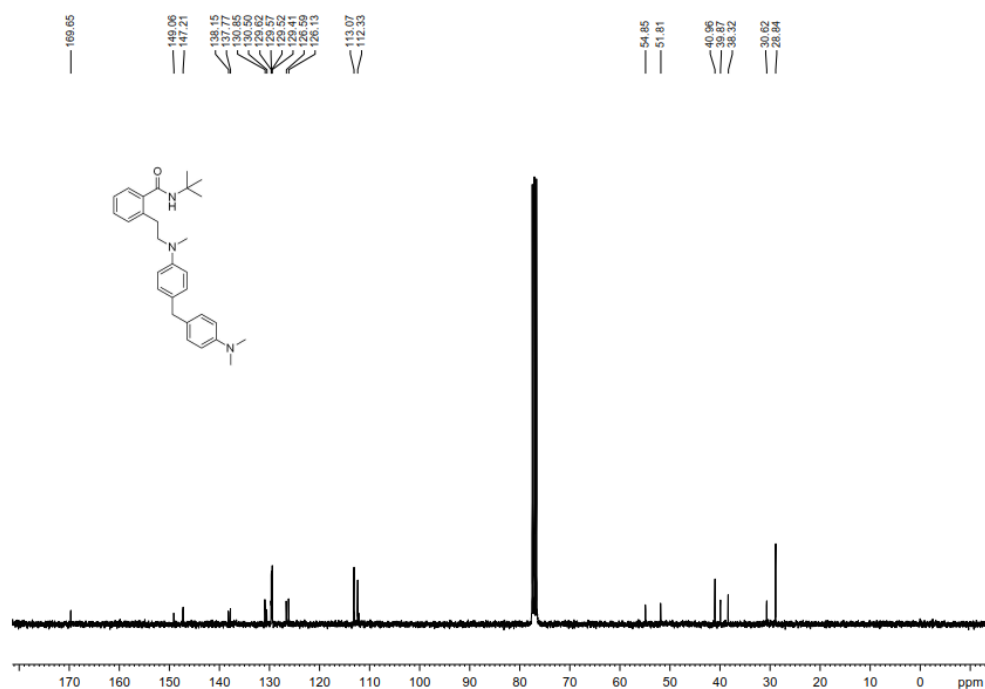

Supplementary Figure 98. <sup>13</sup>C NMR (75 MHz, CDCl<sub>3</sub>) spectra for compound 4i.

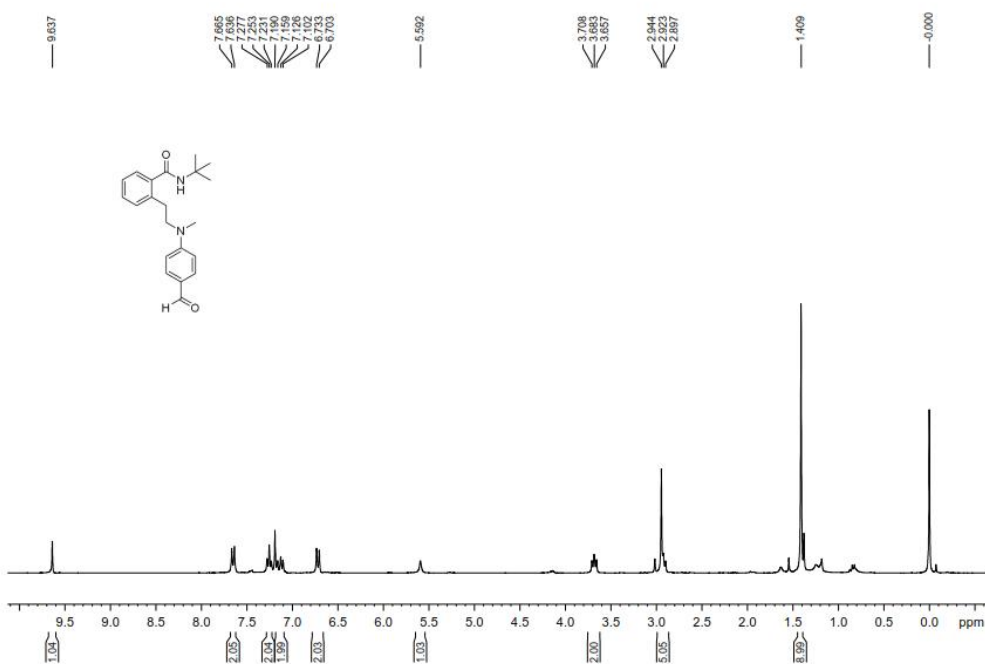

Supplementary Figure 99. <sup>1</sup>H NMR (300 MHz, CDCl<sub>3</sub>) spectra for compound 4j.

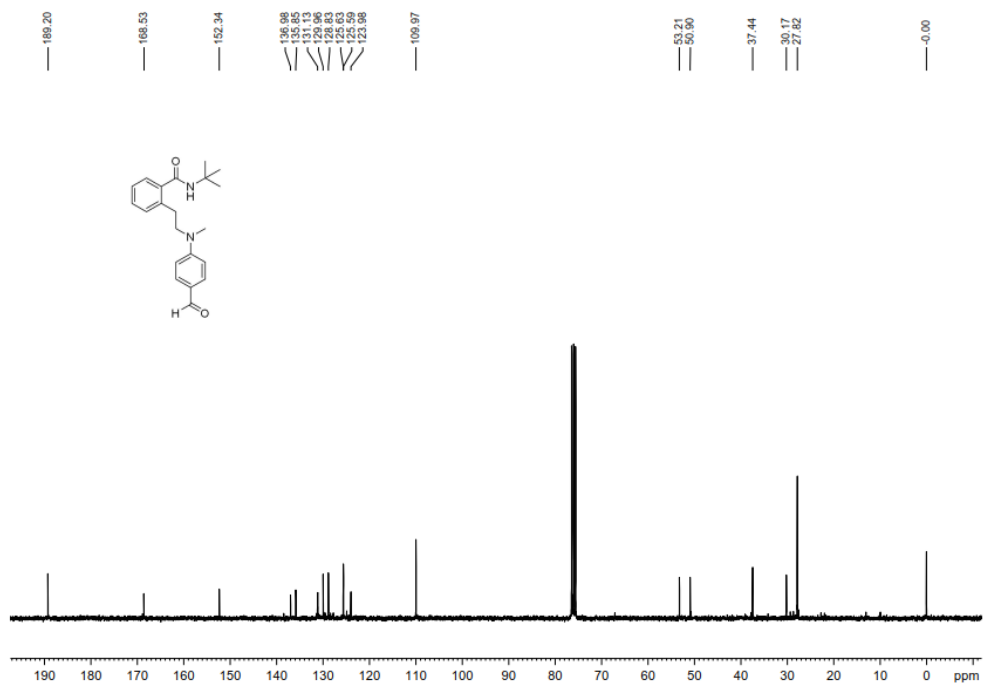

Supplementary Figure 100. <sup>13</sup>C NMR (75 MHz, CDCl<sub>3</sub>) spectra for compound 4j.

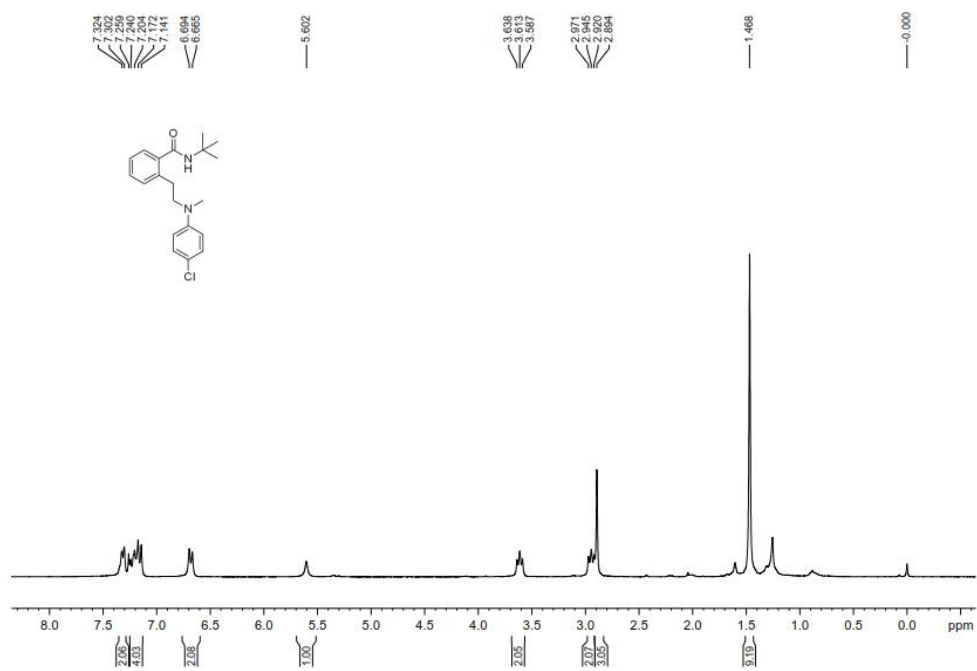

Supplementary Figure 101. <sup>1</sup>H NMR (300 MHz, CDCl<sub>3</sub>) spectra for compound 4k.

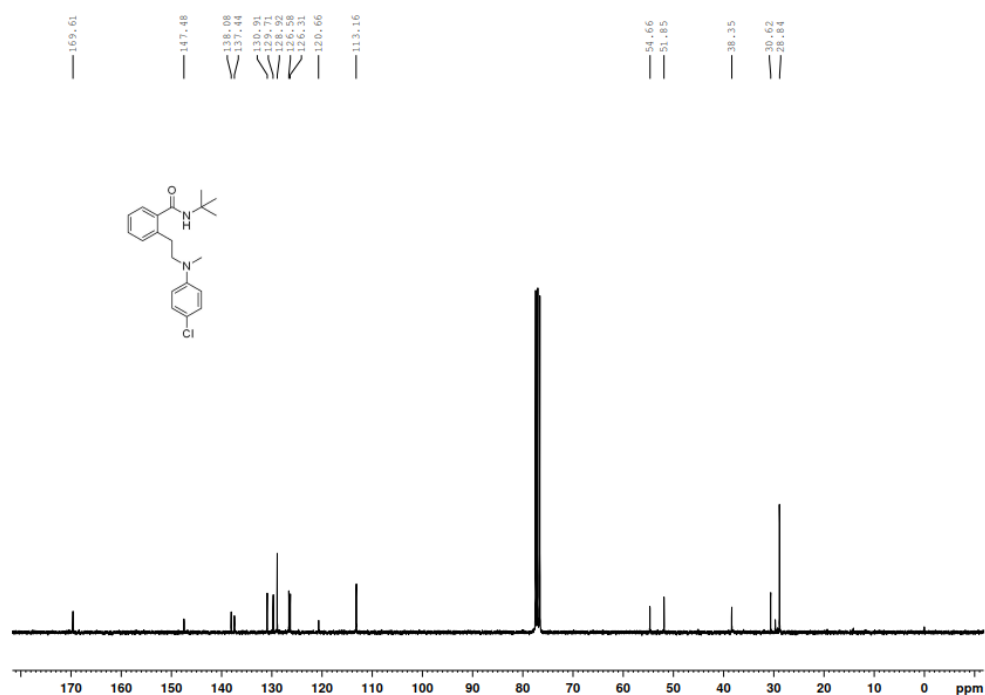

Supplementary Figure 102. <sup>13</sup>C NMR (75 MHz, CDCl<sub>3</sub>) spectra for compound 4k.

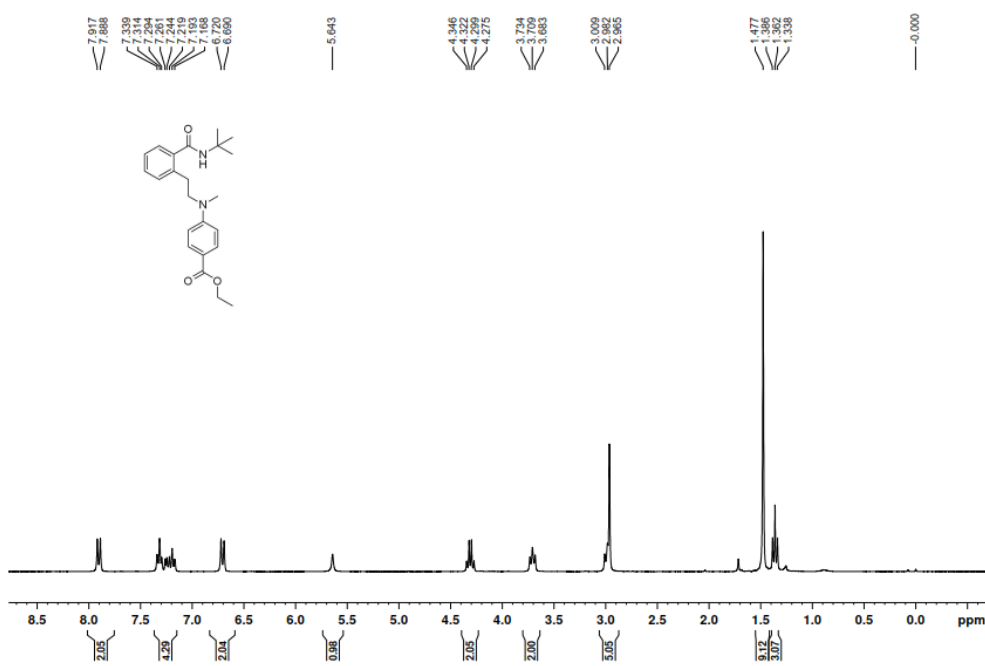

Supplementary Figure 103. <sup>1</sup>H NMR (300 MHz, CDCl<sub>3</sub>) spectra for compound 4l.

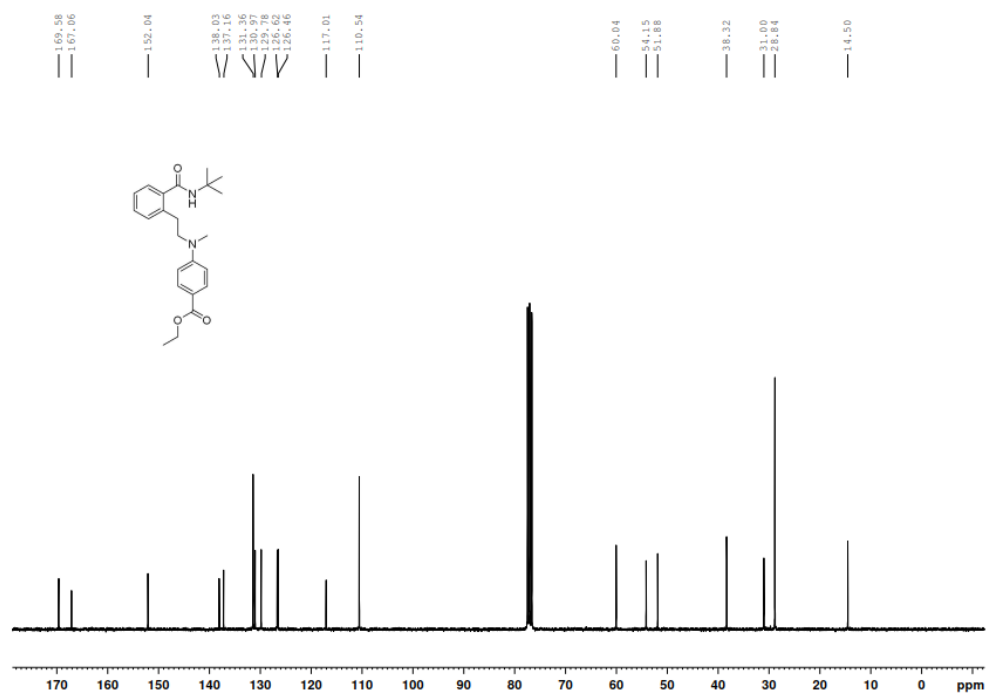

Supplementary Figure 104. <sup>13</sup>C NMR (75 MHz, CDCl<sub>3</sub>) spectra for compound 4l.

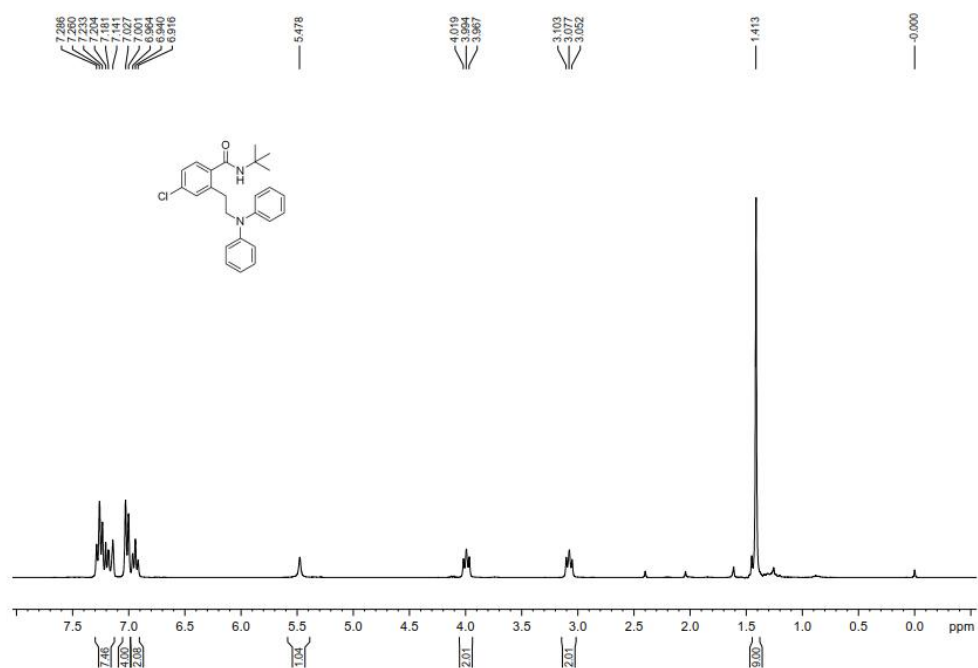

Supplementary Figure 105. <sup>1</sup>H NMR (300 MHz, CDCl<sub>3</sub>) spectra for compound 4m.

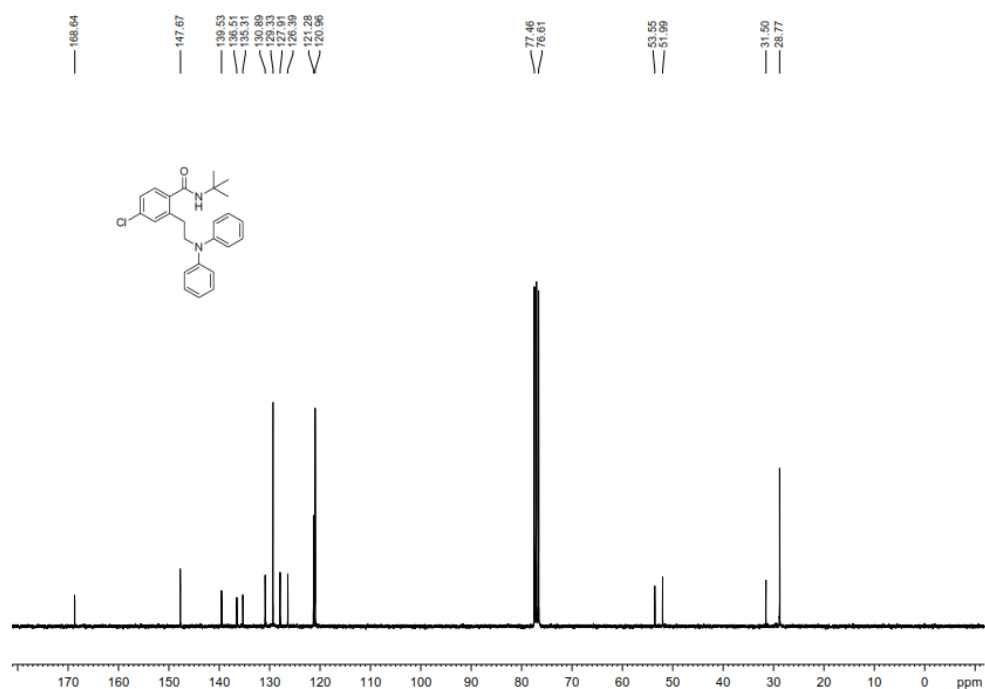

Supplementary Figure 106. <sup>13</sup>C NMR (75 MHz, CDCl<sub>3</sub>) spectra for compound 4m.

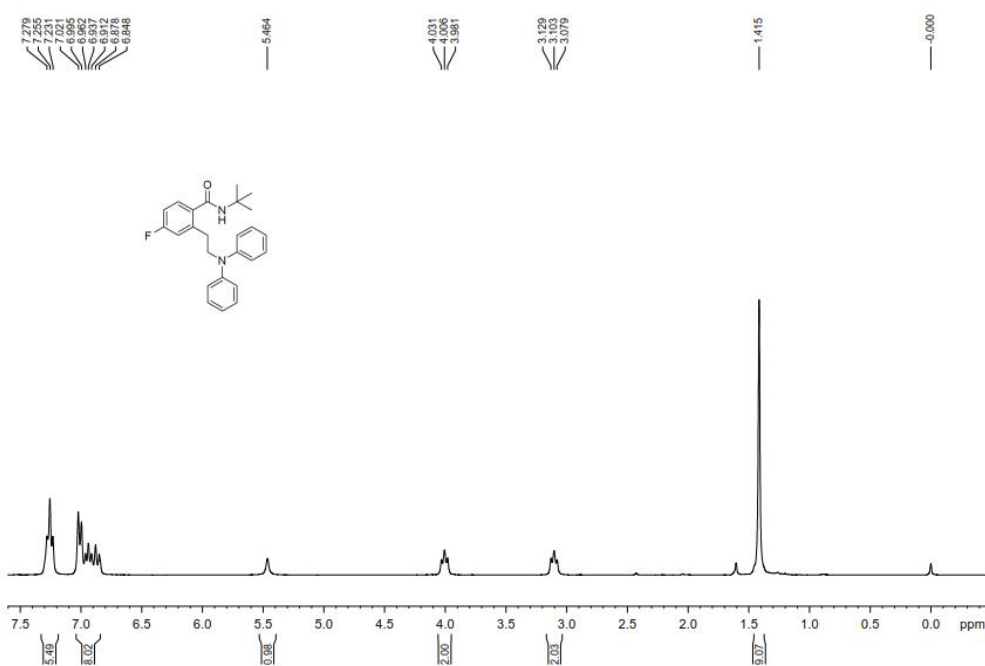

Supplementary Figure 107. <sup>1</sup>H NMR (300 MHz, CDCl<sub>3</sub>) spectra for compound 4n.



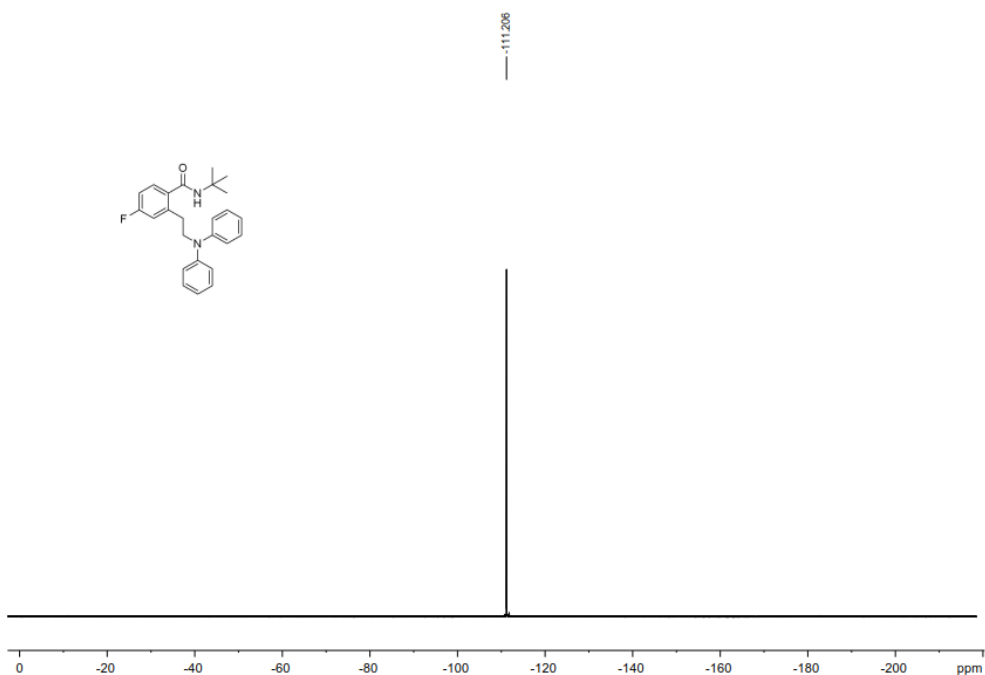

Supplementary Figure 108.  $^{19}\text{F}$  NMR (282 MHz,  $\text{CDCl}_3$ ) spectra for compound **4n**.

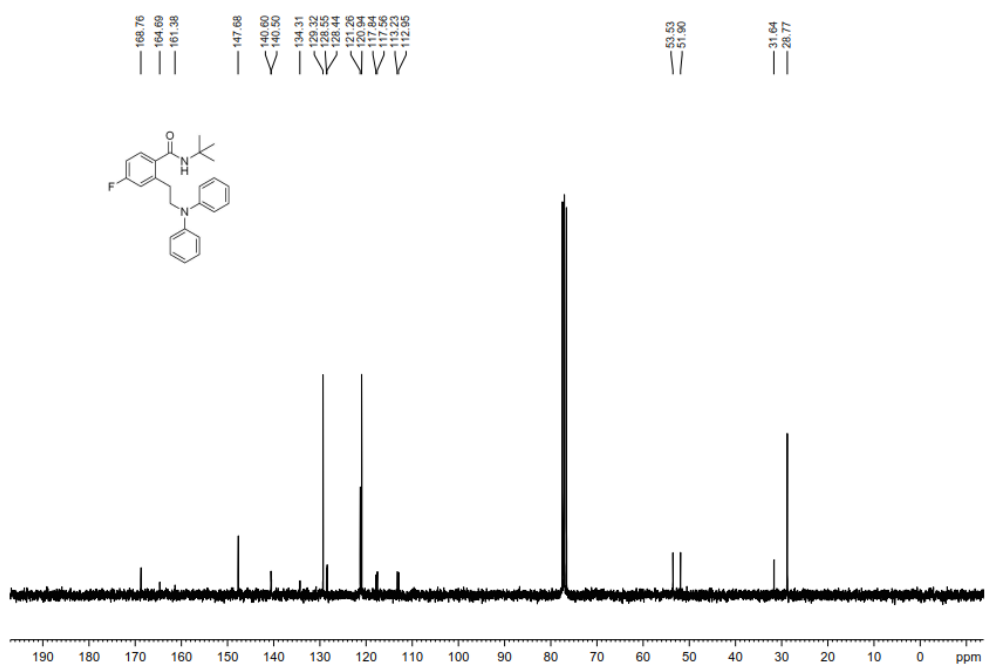

Supplementary Figure 109.  $^{13}\text{C}$  NMR (75 MHz,  $\text{CDCl}_3$ ) spectra for compound **4n**.

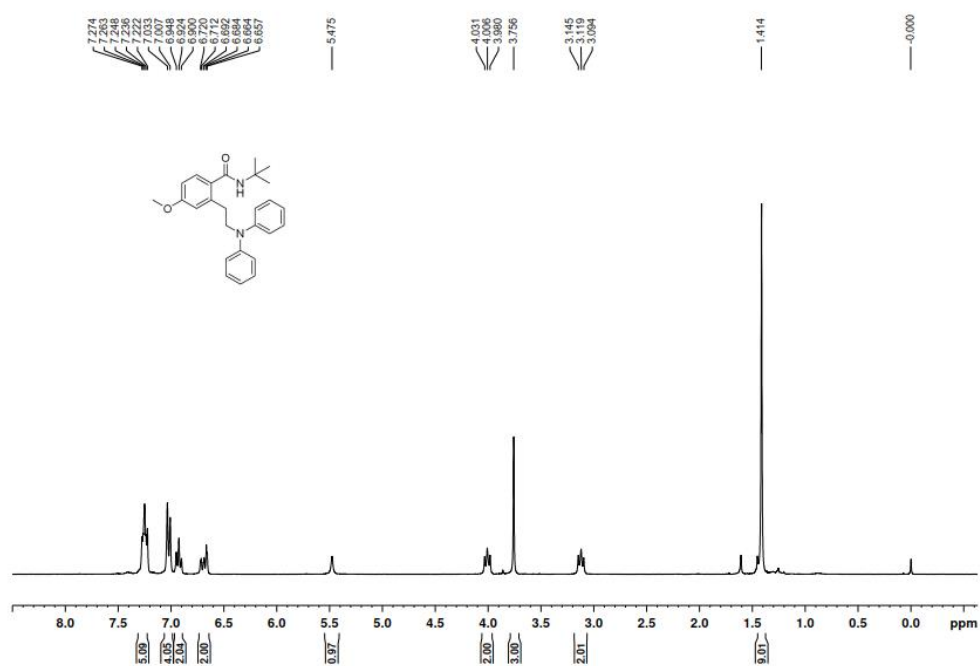

Supplementary Figure 110. <sup>1</sup>H NMR (300 MHz, CDCl<sub>3</sub>) spectra for compound 4o.

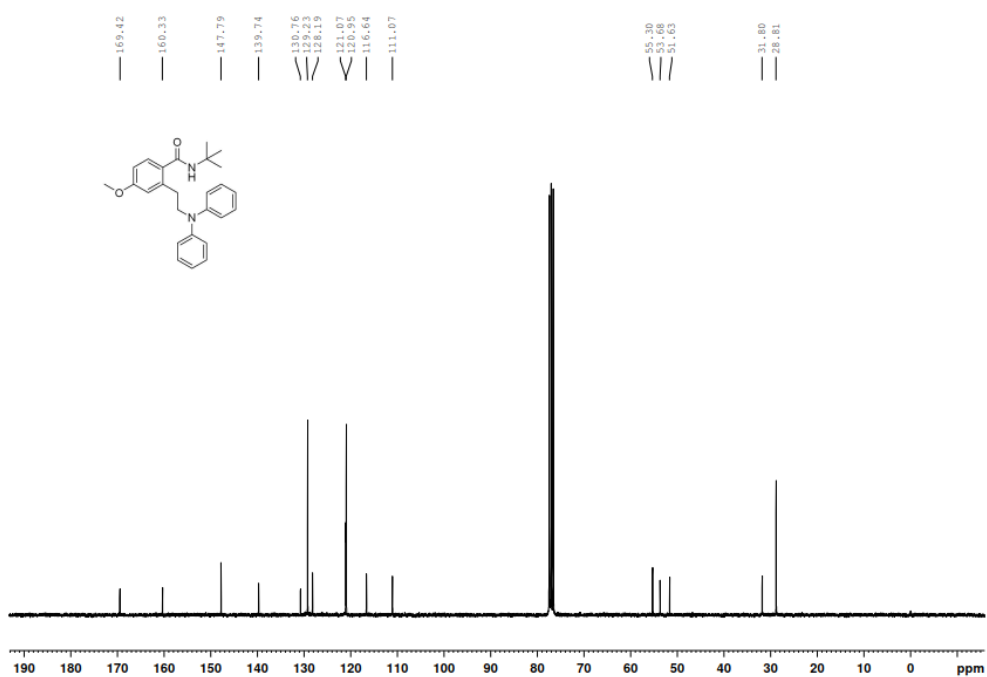

Supplementary Figure 111. <sup>13</sup>C NMR (75 MHz, CDCl<sub>3</sub>) spectra for compound 4o.

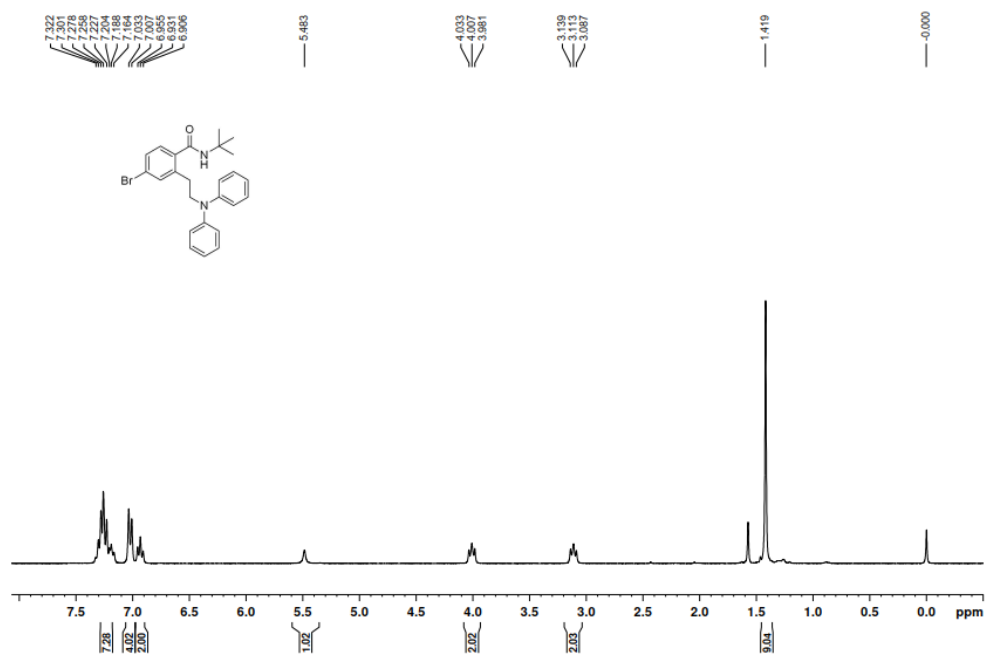

Supplementary Figure 112. <sup>1</sup>H NMR (300 MHz, CDCl<sub>3</sub>) spectra for compound 4p.

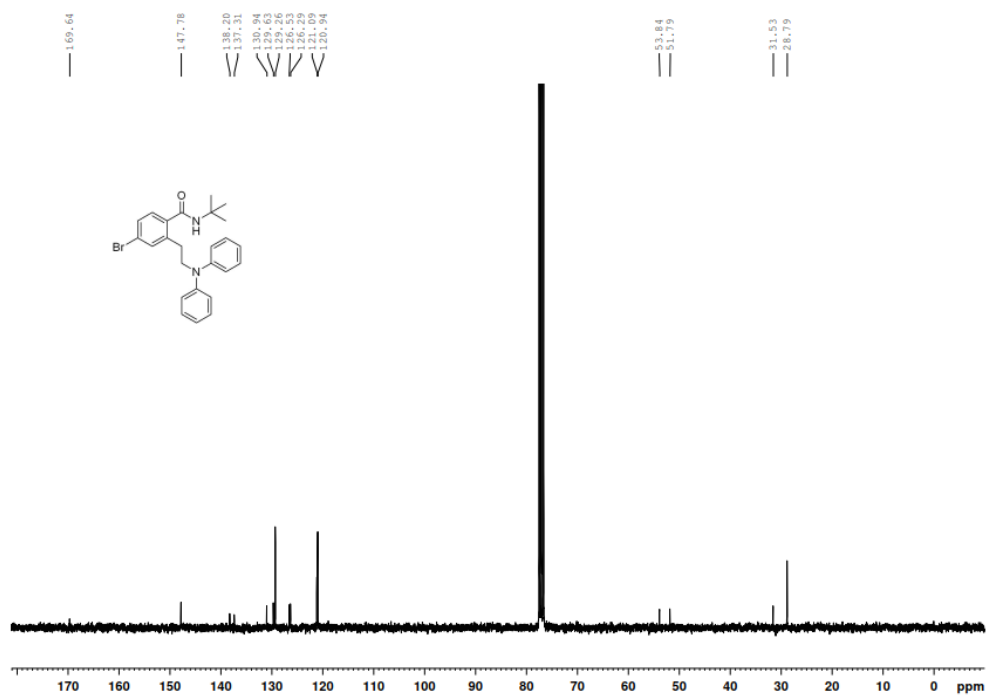

Supplementary Figure 113. <sup>13</sup>C NMR (75 MHz, CDCl<sub>3</sub>) spectra for compound 4p.

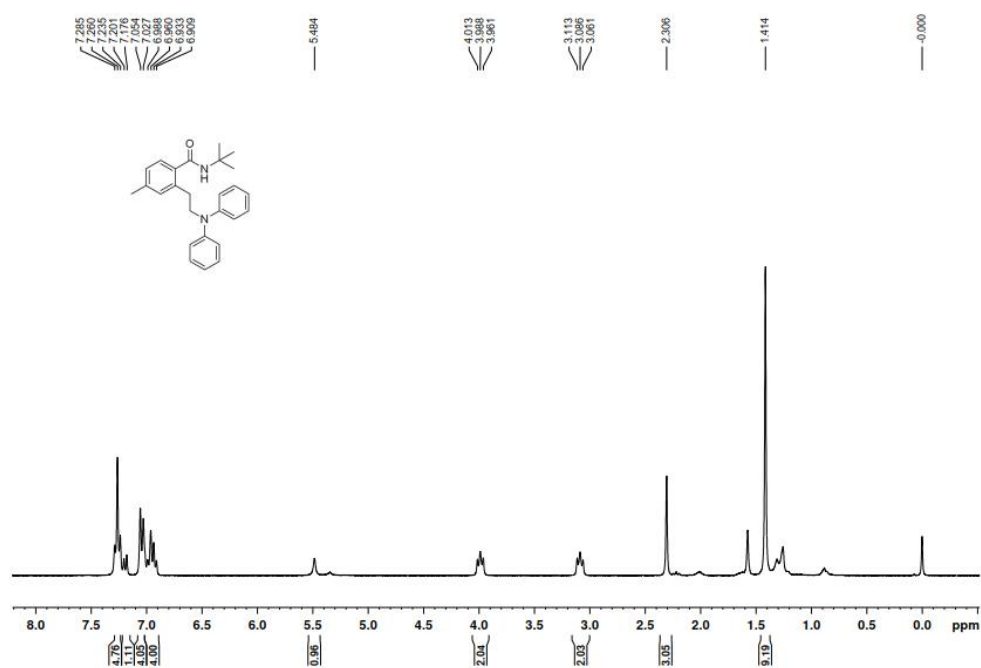

Supplementary Figure 114. <sup>1</sup>H NMR (300 MHz, CDCl<sub>3</sub>) spectra for compound 4q.

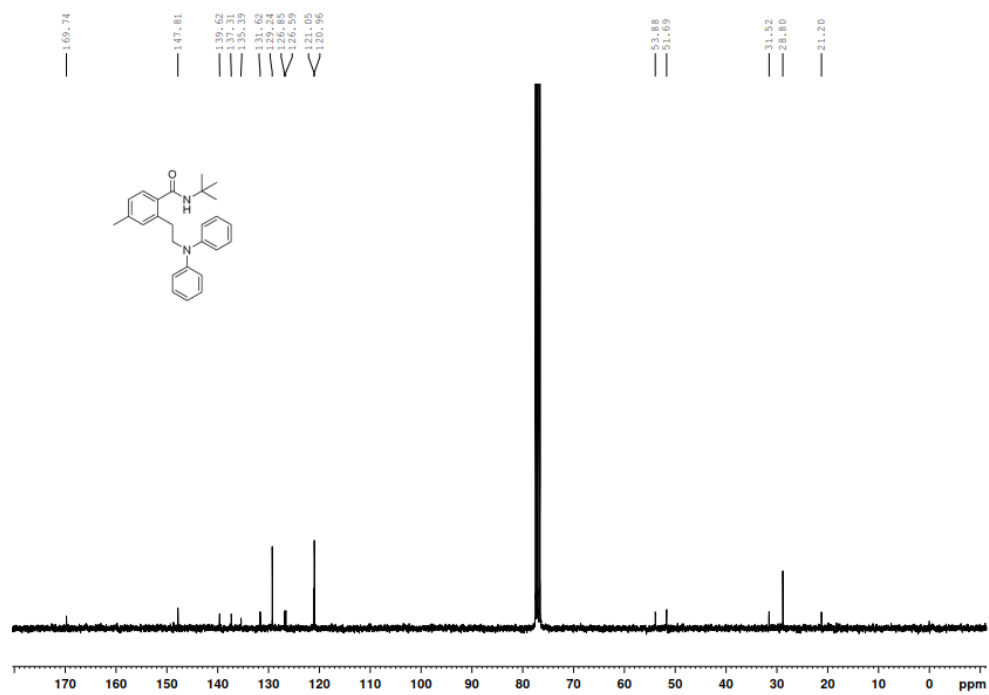

Supplementary Figure 115. <sup>13</sup>C NMR (75 MHz, CDCl<sub>3</sub>) spectra for compound 4q.

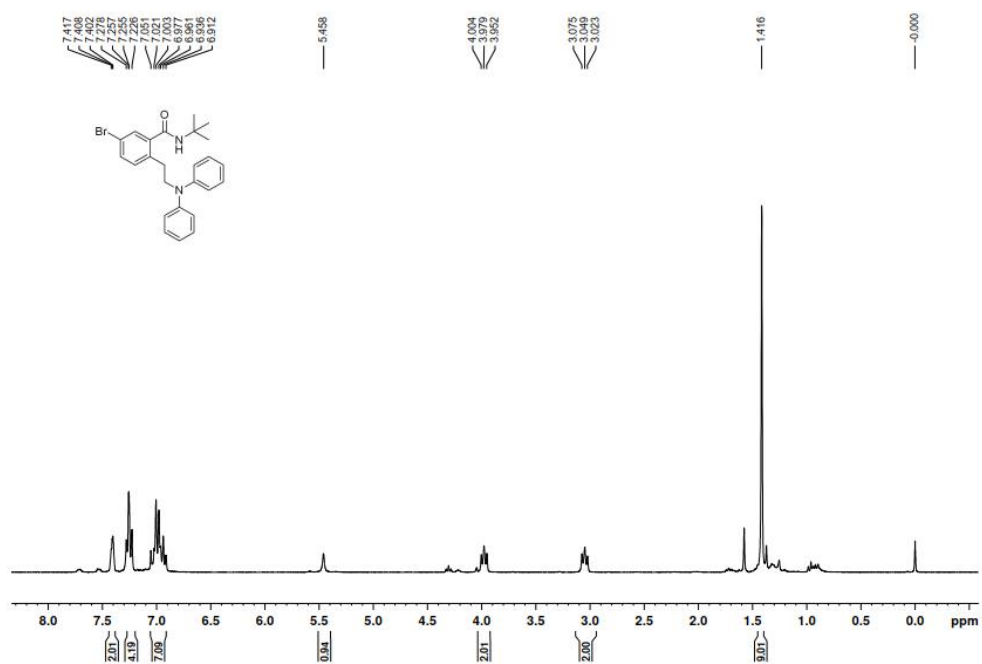

Supplementary Figure 116. <sup>1</sup>H NMR (300 MHz, CDCl<sub>3</sub>) spectra for compound 4r.

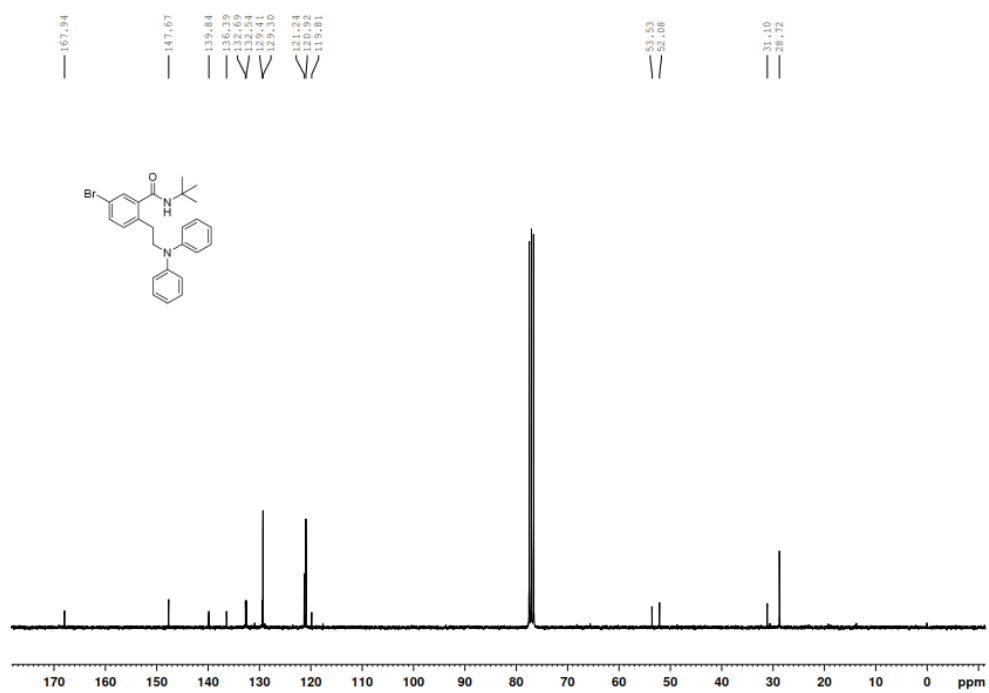

Supplementary Figure 117. <sup>13</sup>C NMR (75 MHz, CDCl<sub>3</sub>) spectra for compound 4r.

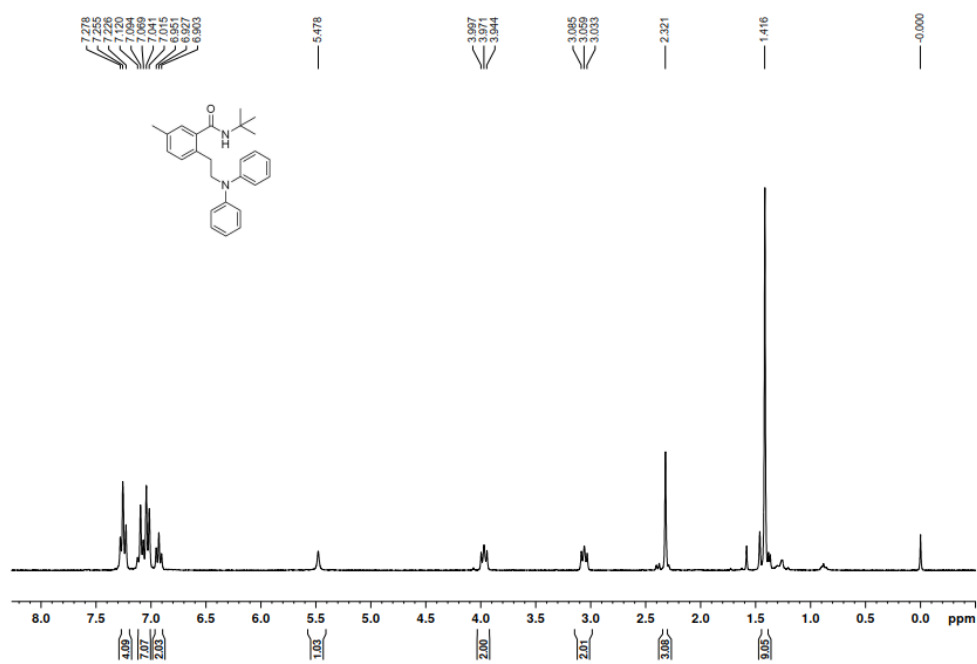

Supplementary Figure 118. <sup>1</sup>H NMR (300 MHz, CDCl<sub>3</sub>) spectra for compound 4s.

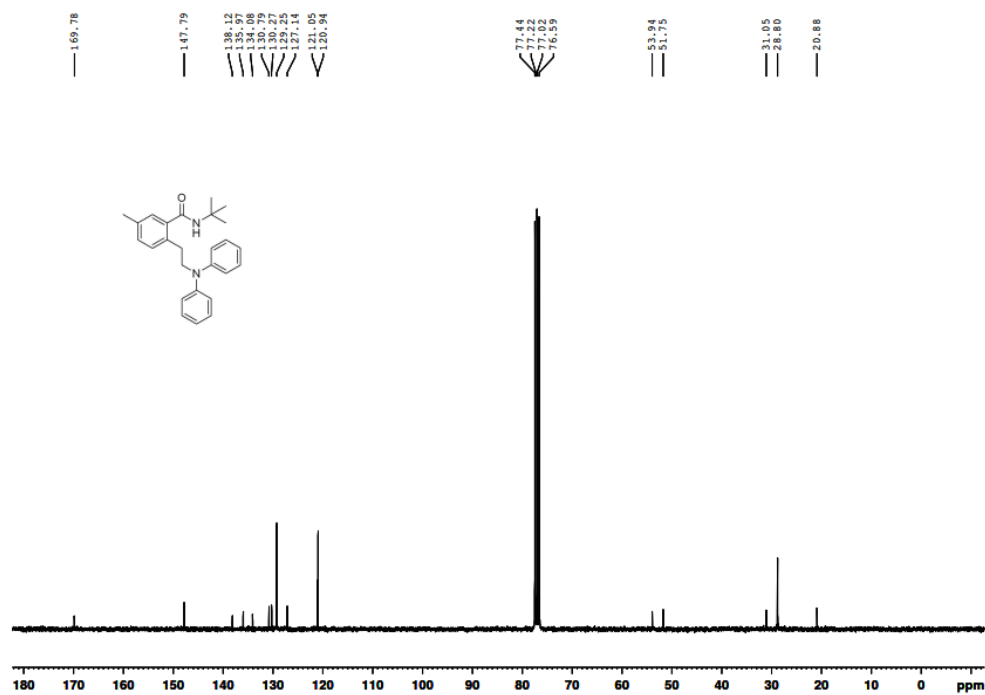

Supplementary Figure 119. <sup>13</sup>C NMR (75 MHz, CDCl<sub>3</sub>) spectra for compound 4s.

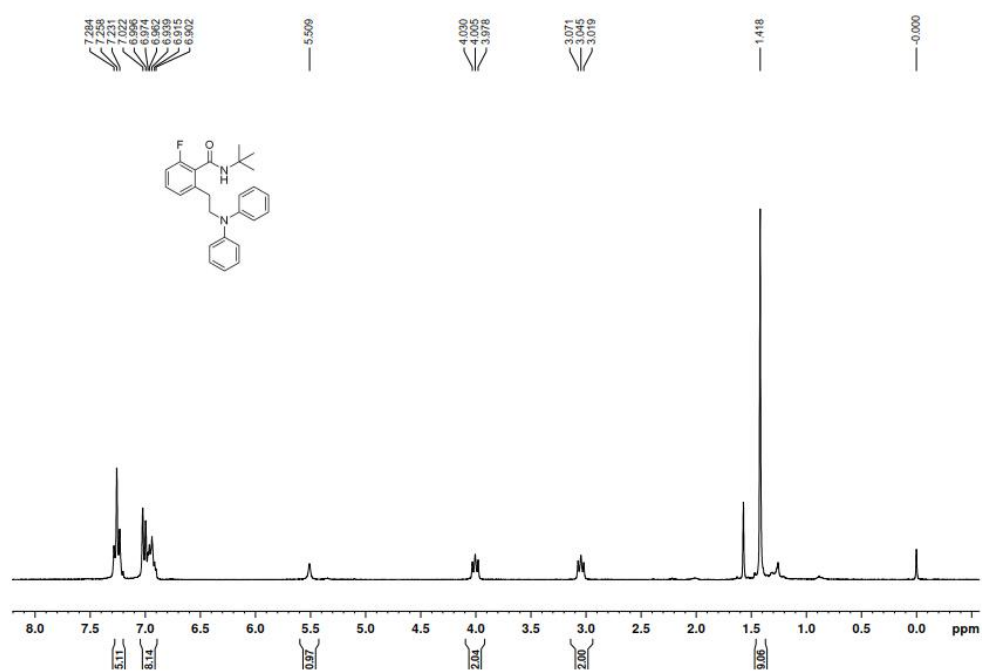

Supplementary Figure 120. <sup>1</sup>H NMR (300 MHz, CDCl<sub>3</sub>) spectra for compound 4t.

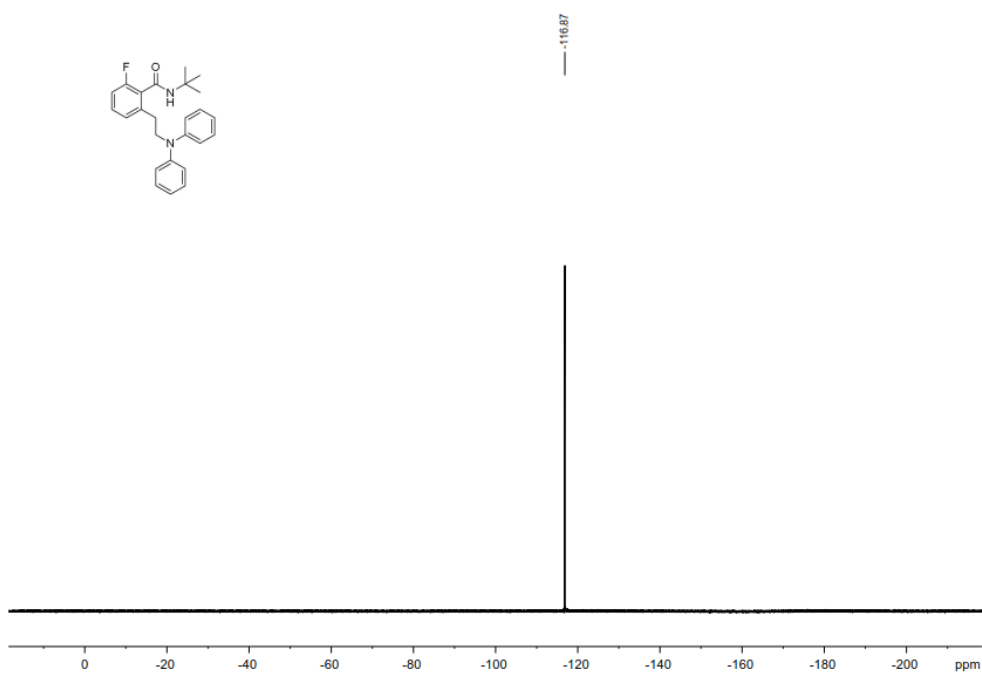

Supplementary Figure 121. <sup>19</sup>F NMR (282 MHz, CDCl<sub>3</sub>) spectra for compound 4t.

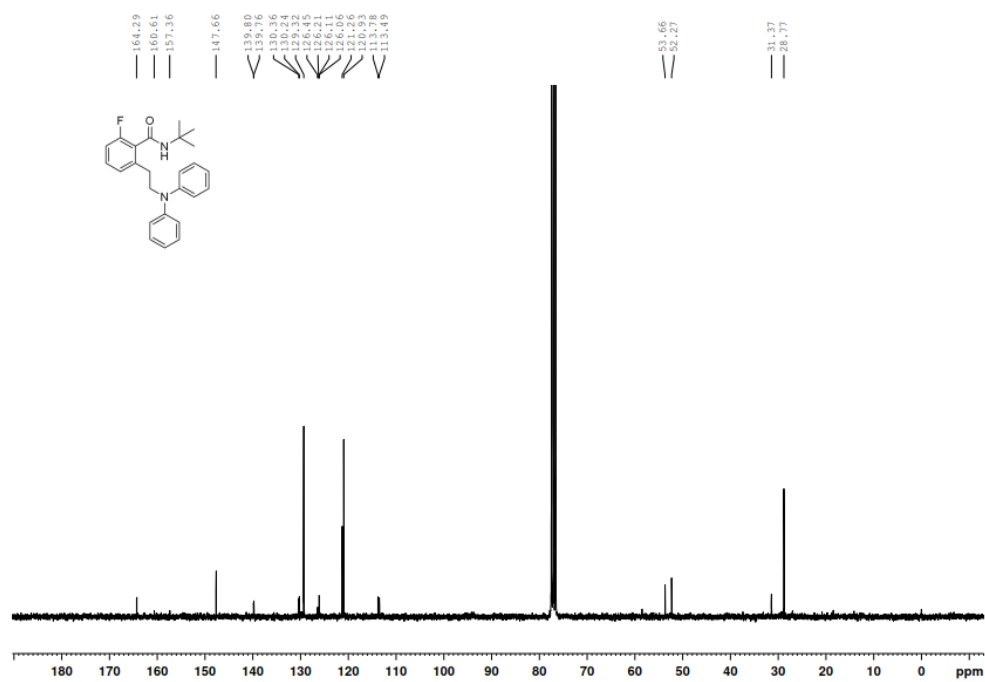

Supplementary Figure 122. <sup>13</sup>C NMR (75 MHz, CDCl<sub>3</sub>) spectra for compound 4t.

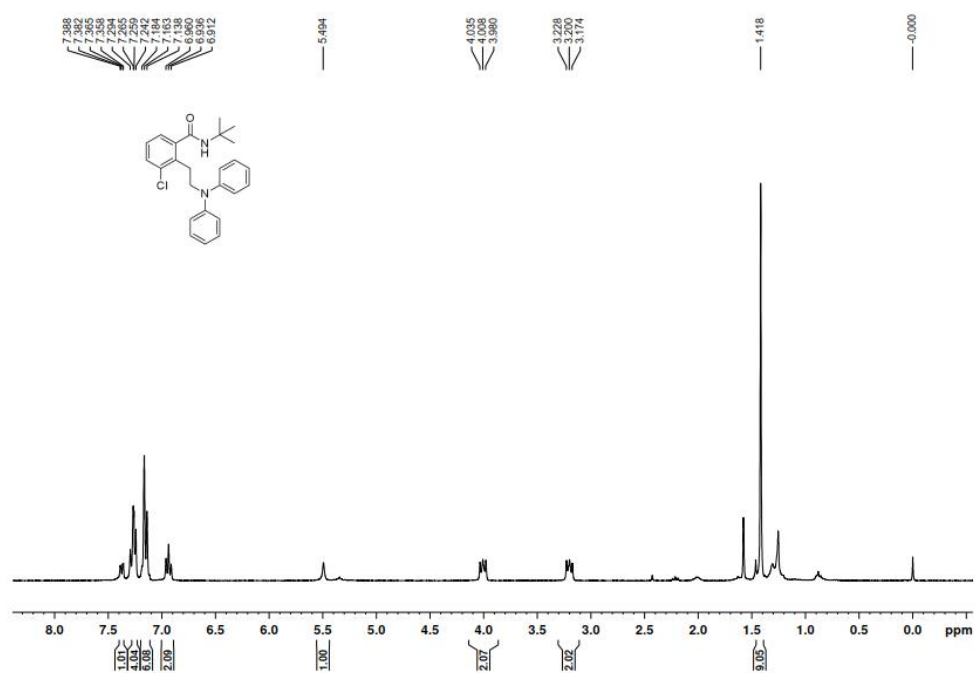

Supplementary Figure 123. <sup>1</sup>H NMR (300 MHz, CDCl<sub>3</sub>) spectra for compound 4u.



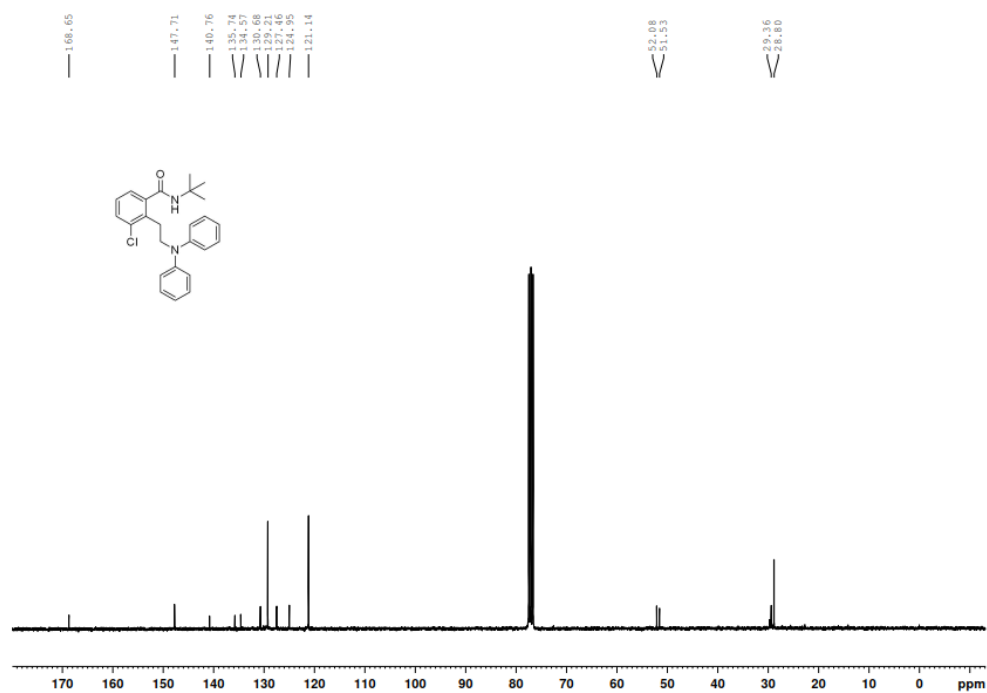

Supplementary Figure 124. <sup>13</sup>C NMR (75 MHz, CDCl<sub>3</sub>) spectra for compound 4u.

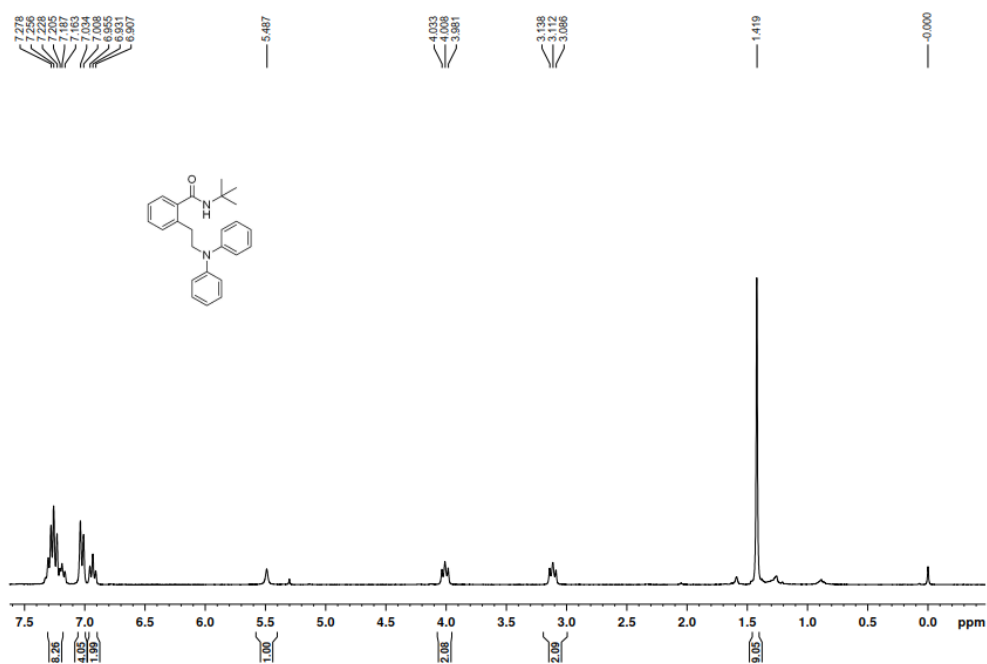

Supplementary Figure 125. <sup>1</sup>H NMR (300 MHz, CDCl<sub>3</sub>) spectra for compound 4u.

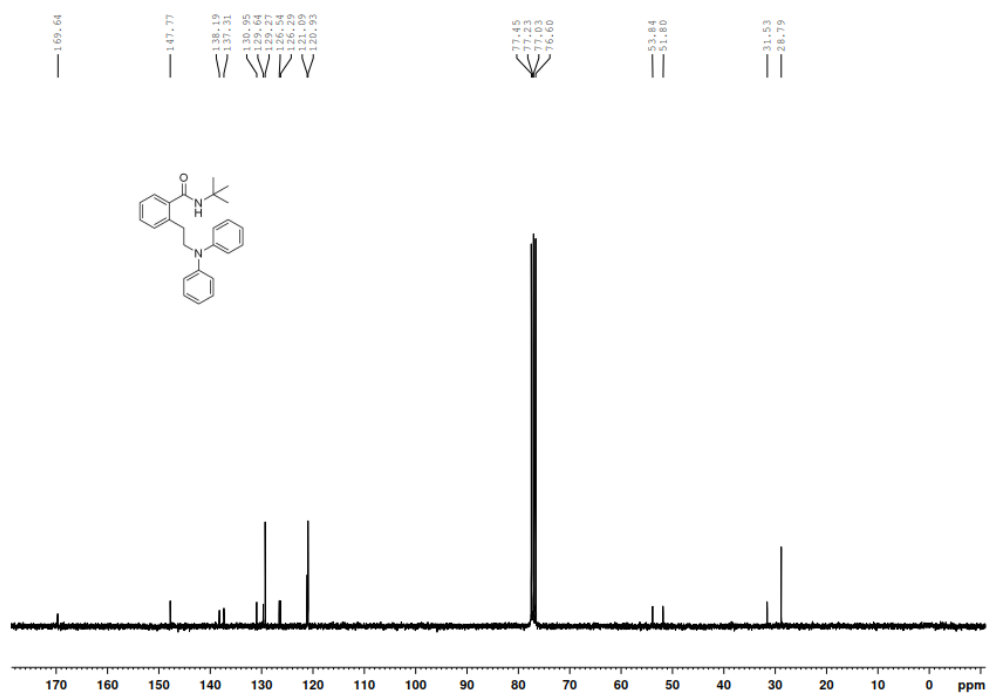

Supplementary Figure 126. <sup>13</sup>C NMR (75 MHz, CDCl<sub>3</sub>) spectra for compound 4v.

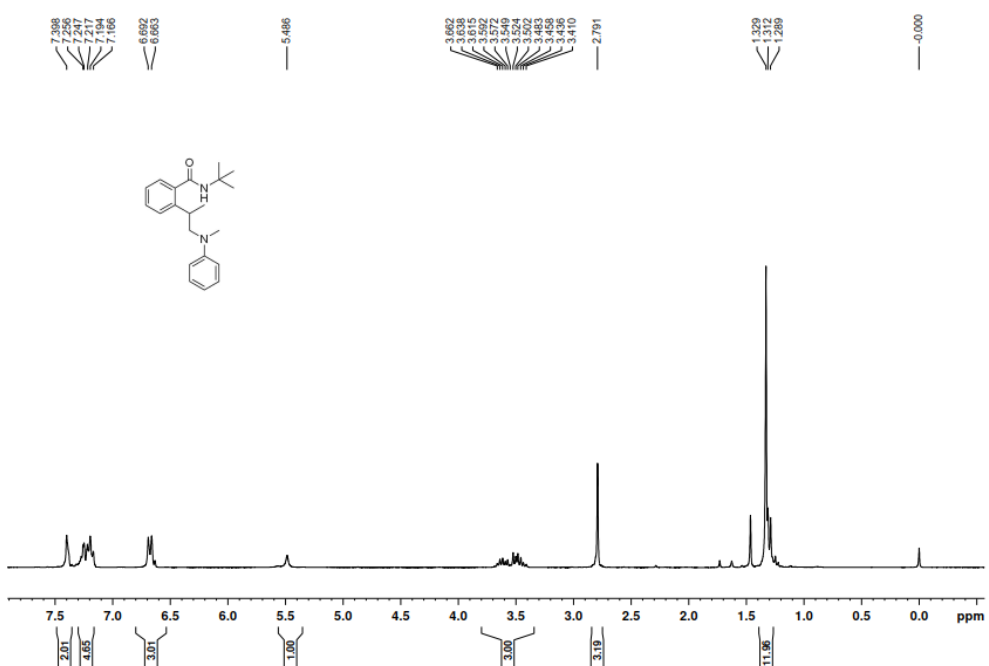

Supplementary Figure 127. <sup>1</sup>H NMR (300 MHz, CDCl<sub>3</sub>) spectra for compound 4w.

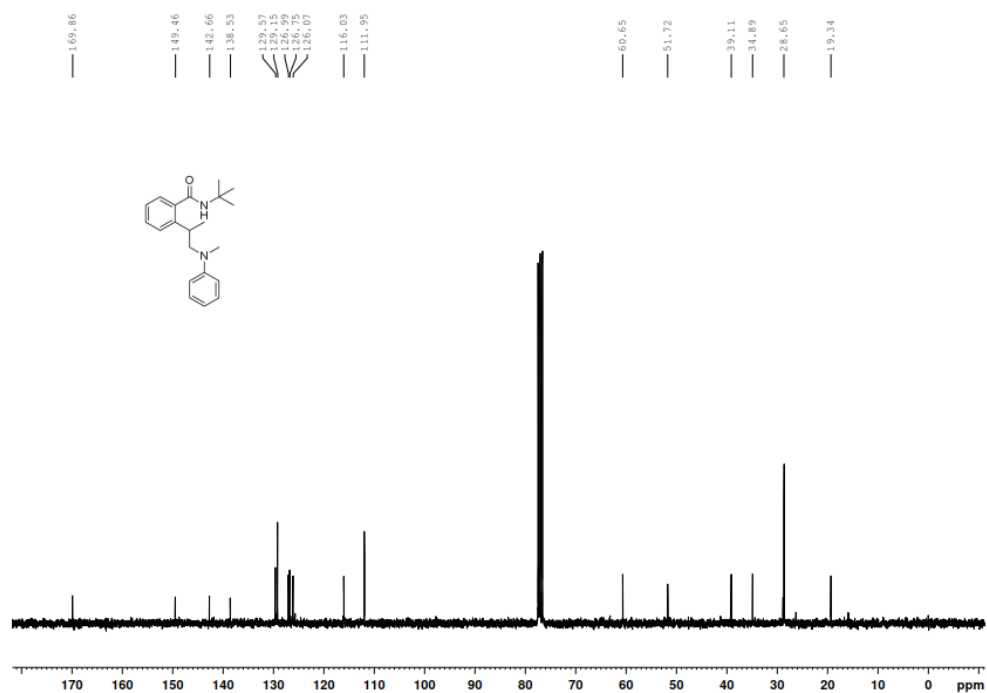

Supplementary Figure 128. <sup>13</sup>C NMR (75 MHz, CDCl<sub>3</sub>) spectra for compound 4w.

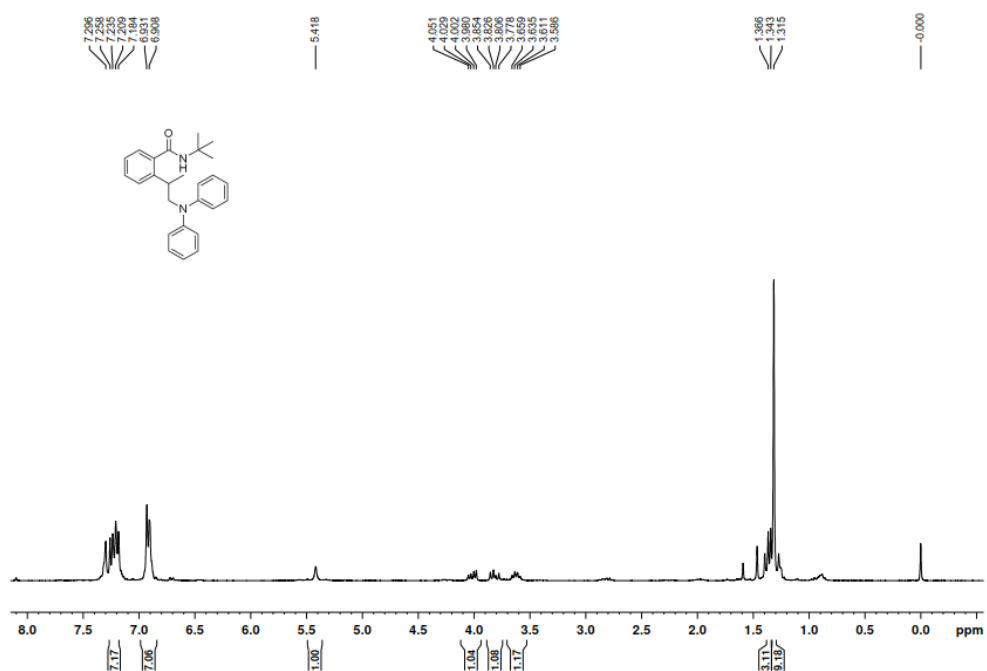

Supplementary Figure 129. <sup>1</sup>H NMR (300 MHz, CDCl<sub>3</sub>) spectra for compound 4x.

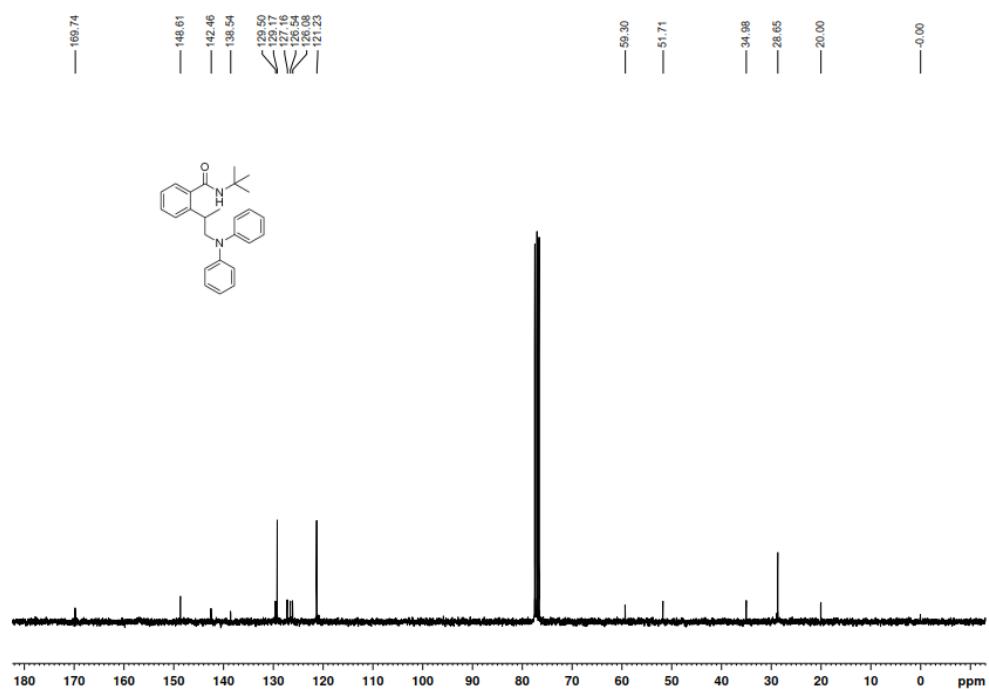

Supplementary Figure 130. <sup>13</sup>C NMR (75 MHz, CDCl<sub>3</sub>) spectra for compound 4x.

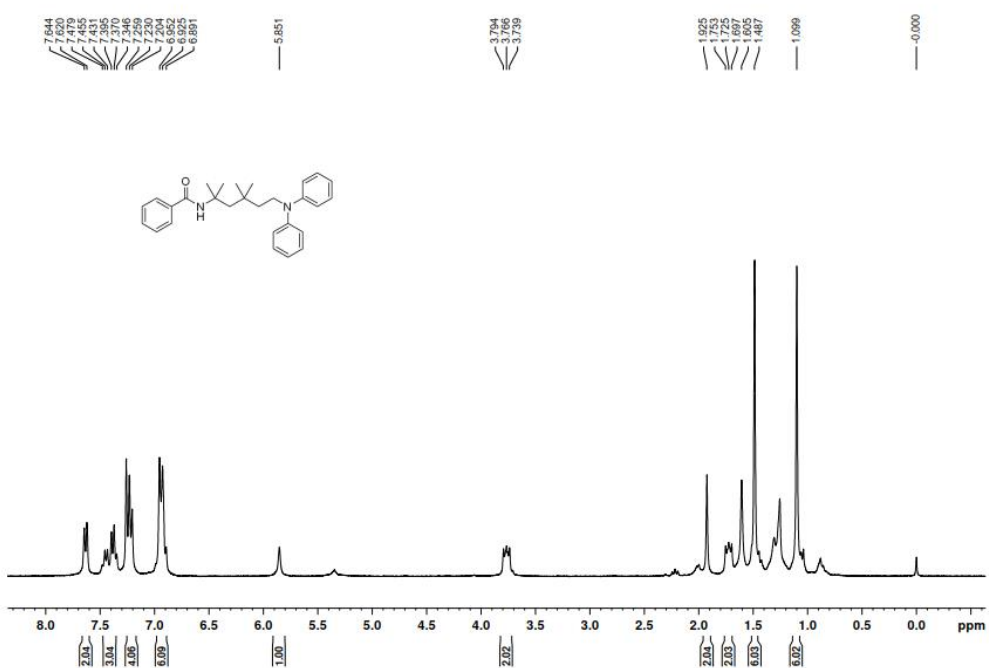

Supplementary Figure 131. <sup>1</sup>H NMR (300 MHz, CDCl<sub>3</sub>) spectra for compound 5.

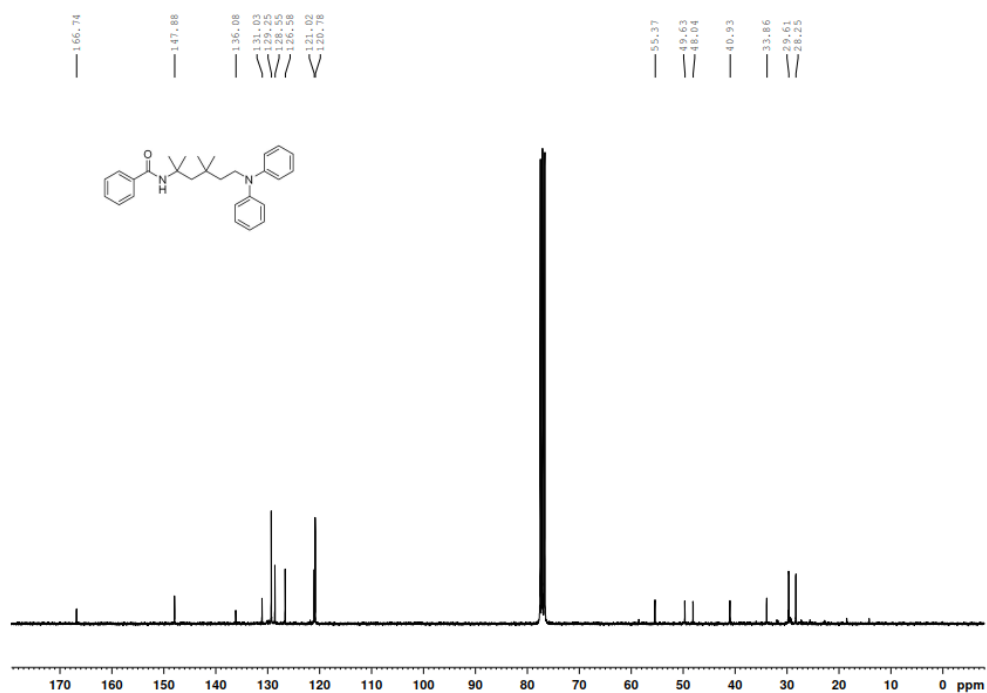

Supplementary Figure 132.  $^{13}\text{C}$  NMR (75 MHz,  $\text{CDCl}_3$ ) spectra for compound 5.

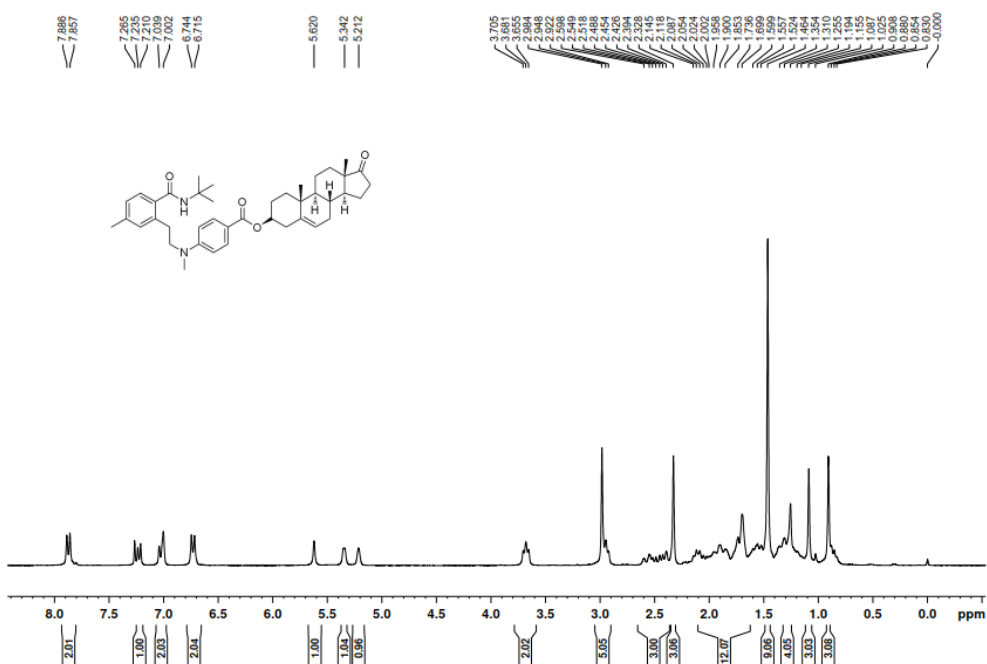

Supplementary Figure 133.  $^1\text{H}$  NMR (300 MHz,  $\text{CDCl}_3$ ) spectra for compound 6.

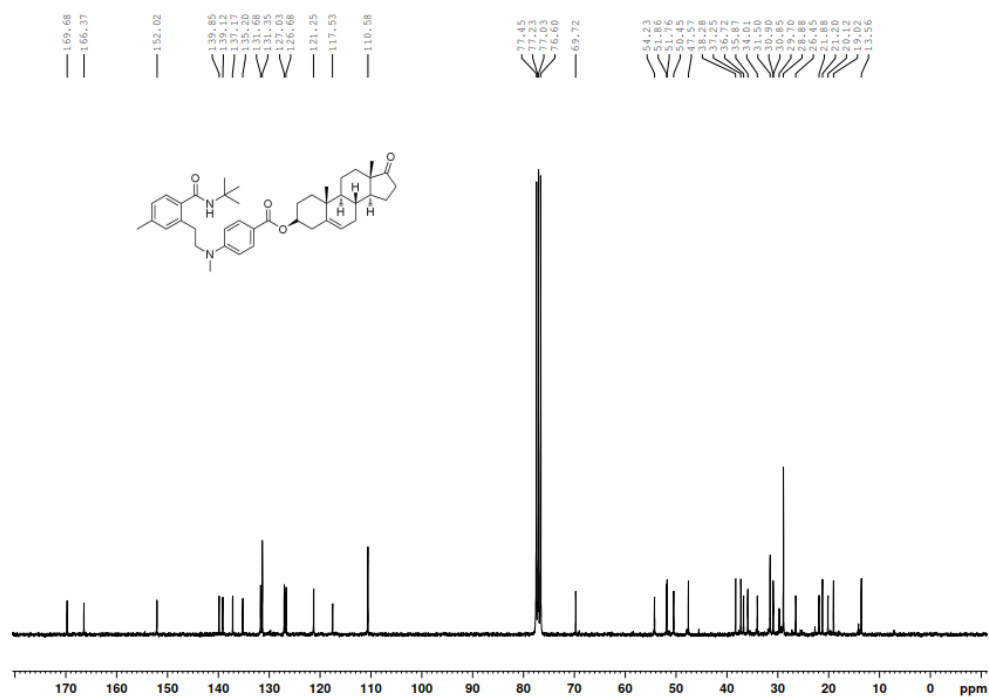

Supplementary Figure 134.  $^{13}\text{C}$  NMR (75 MHz,  $\text{CDCl}_3$ ) spectra for compound 6.

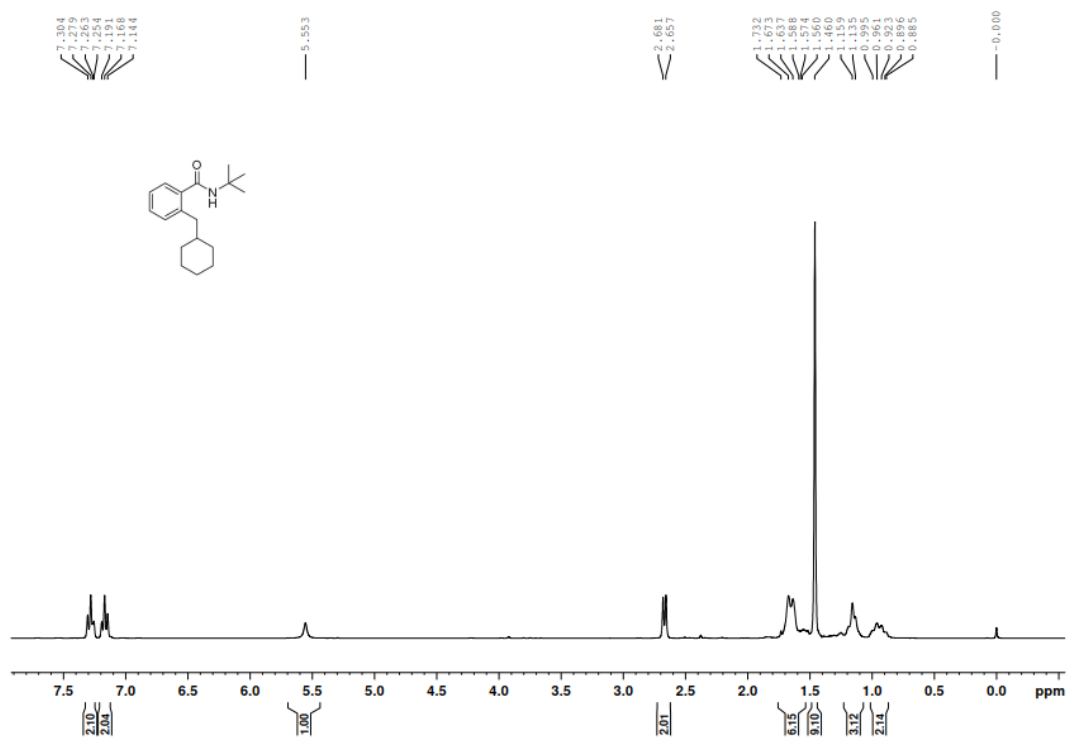

Supplementary Figure 135.  $^1\text{H}$  NMR (300 MHz,  $\text{CDCl}_3$ ) spectra for compound 8a.

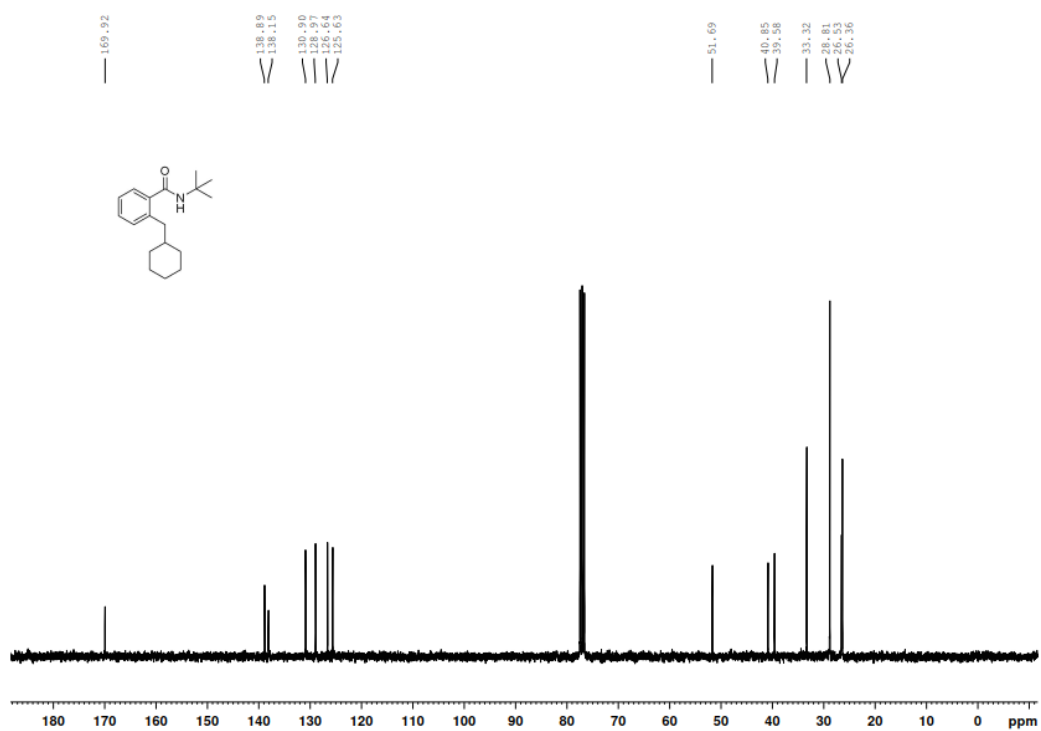

Supplementary Figure 136. <sup>13</sup>C NMR (75 MHz, CDCl<sub>3</sub>) spectra for compound 8a.

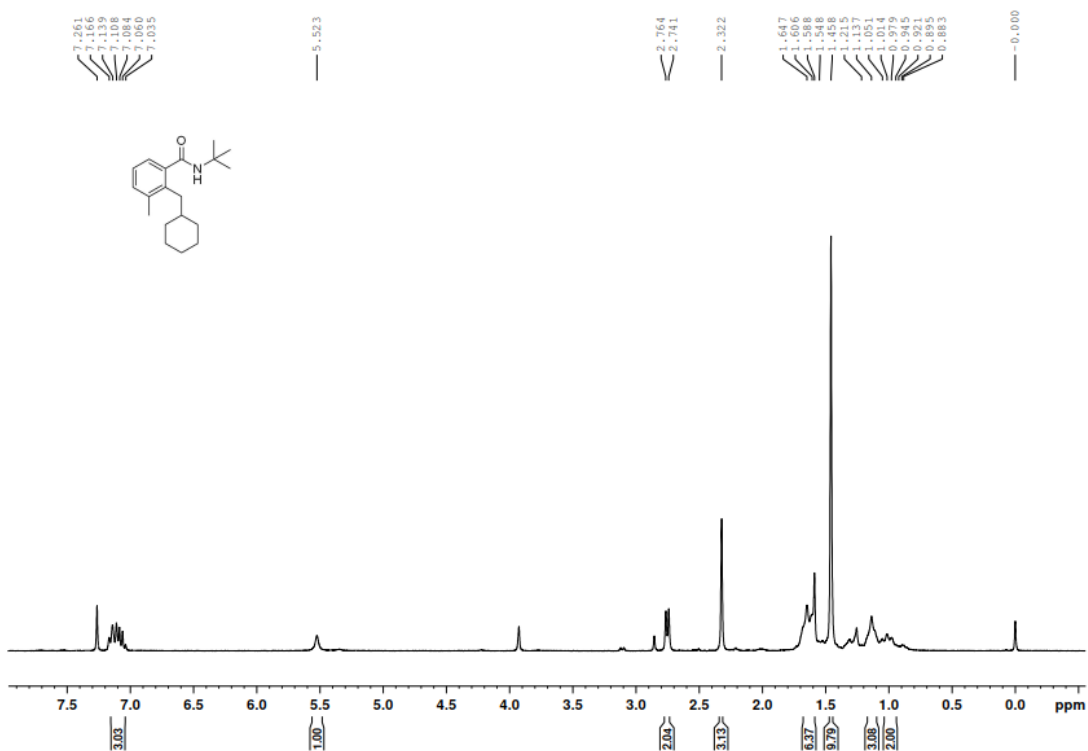

Supplementary Figure 137. <sup>1</sup>H NMR (300 MHz, CDCl<sub>3</sub>) spectra for compound 8b.

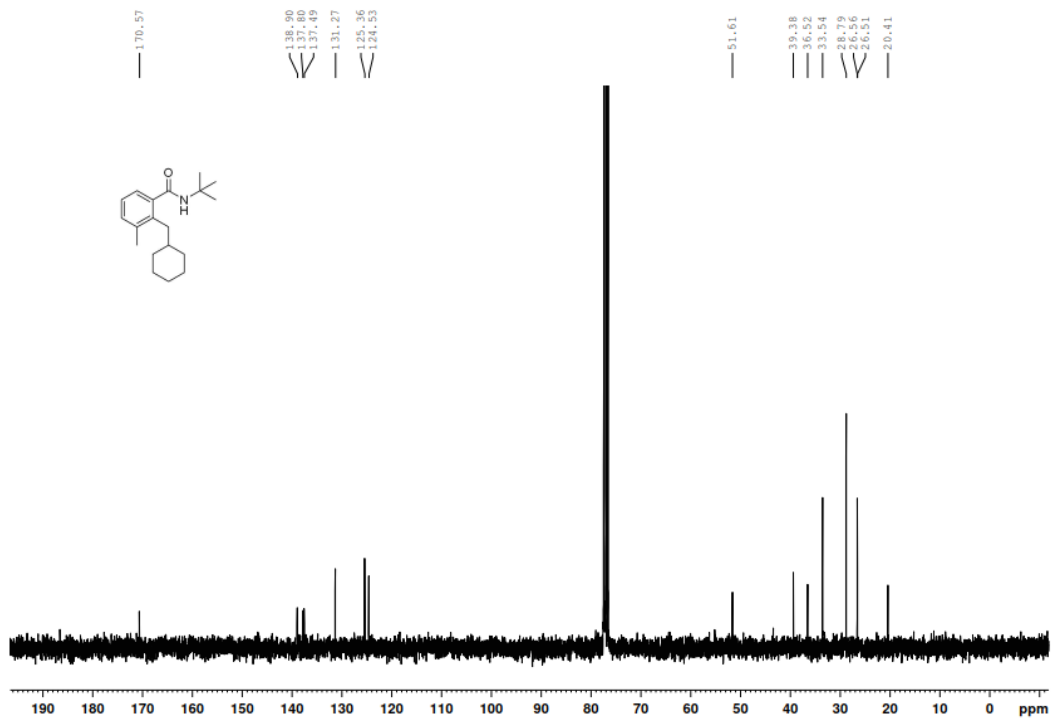

Supplementary Figure 138. <sup>13</sup>C NMR (75 MHz, CDCl<sub>3</sub>) spectra for compound 8b.

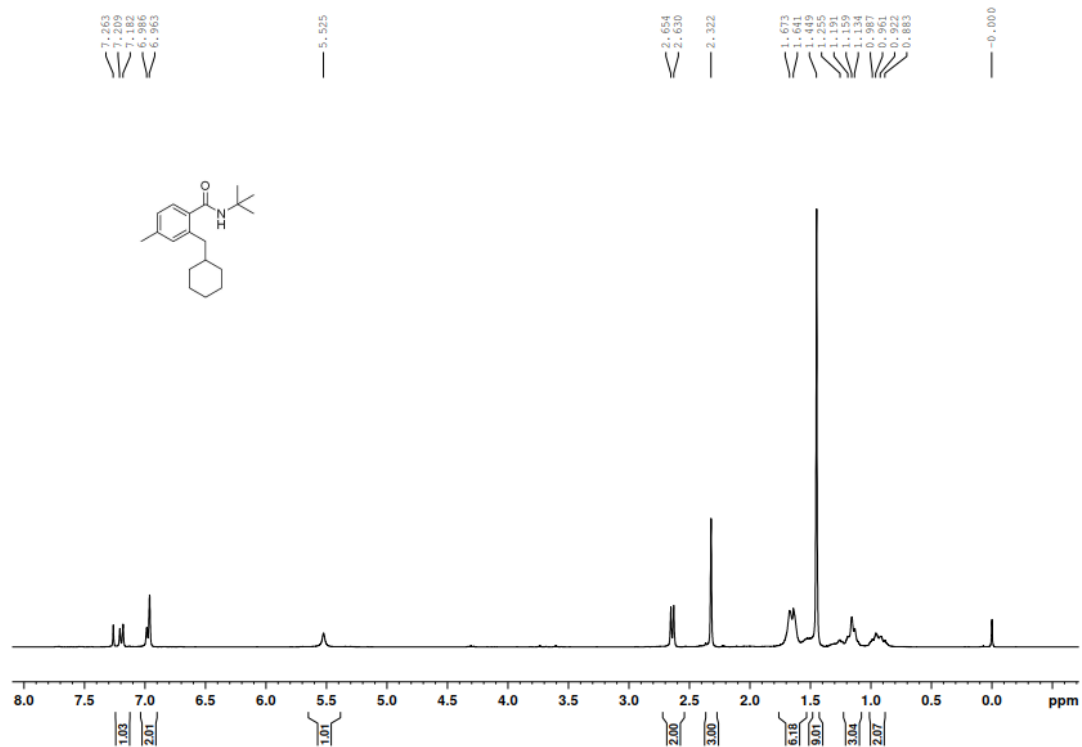

Supplementary Figure 139. <sup>1</sup>H NMR (300 MHz, CDCl<sub>3</sub>) spectra for compound 8c.



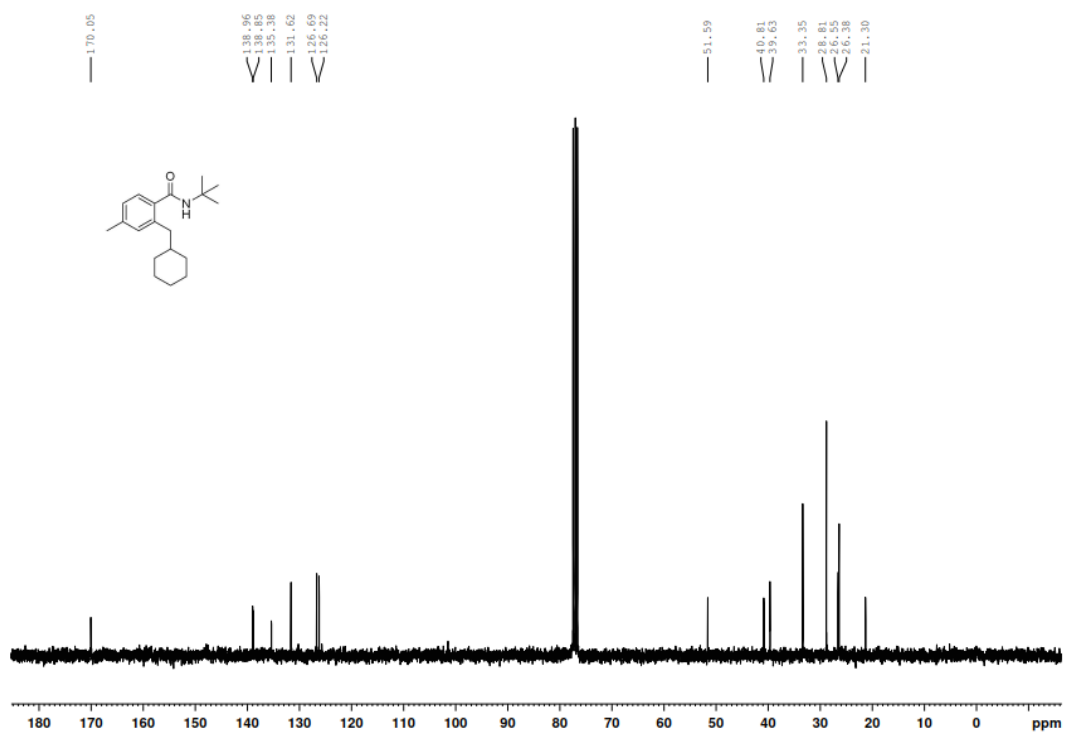

Supplementary Figure 140. <sup>13</sup>C NMR (75 MHz, CDCl<sub>3</sub>) spectra for compound 8c.

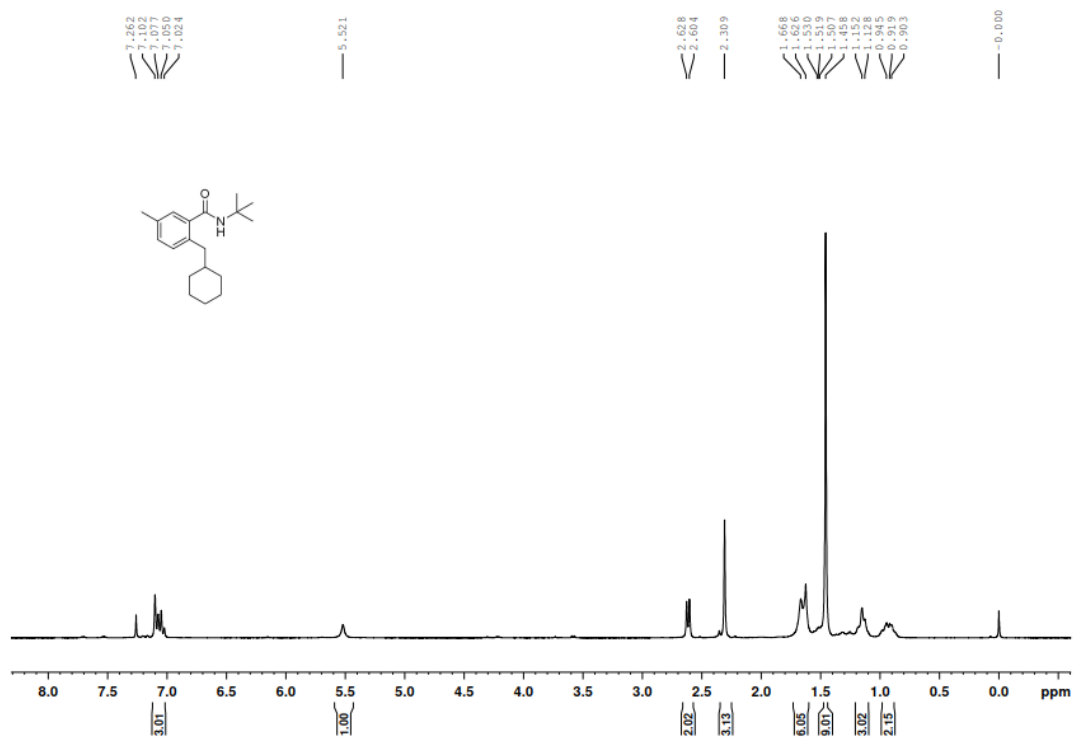

Supplementary Figure 141. <sup>1</sup>H NMR (300 MHz, CDCl<sub>3</sub>) spectra for compound 8d.

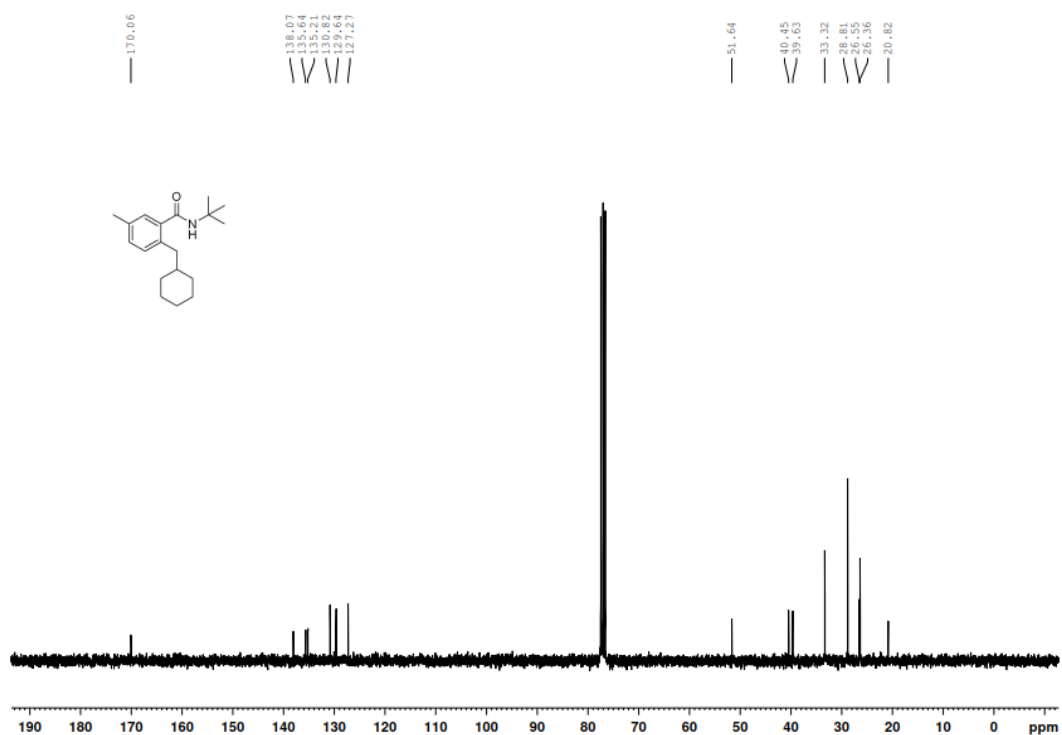

Supplementary Figure 142. <sup>13</sup>C NMR (75 MHz, CDCl<sub>3</sub>) spectra for compound 8d.

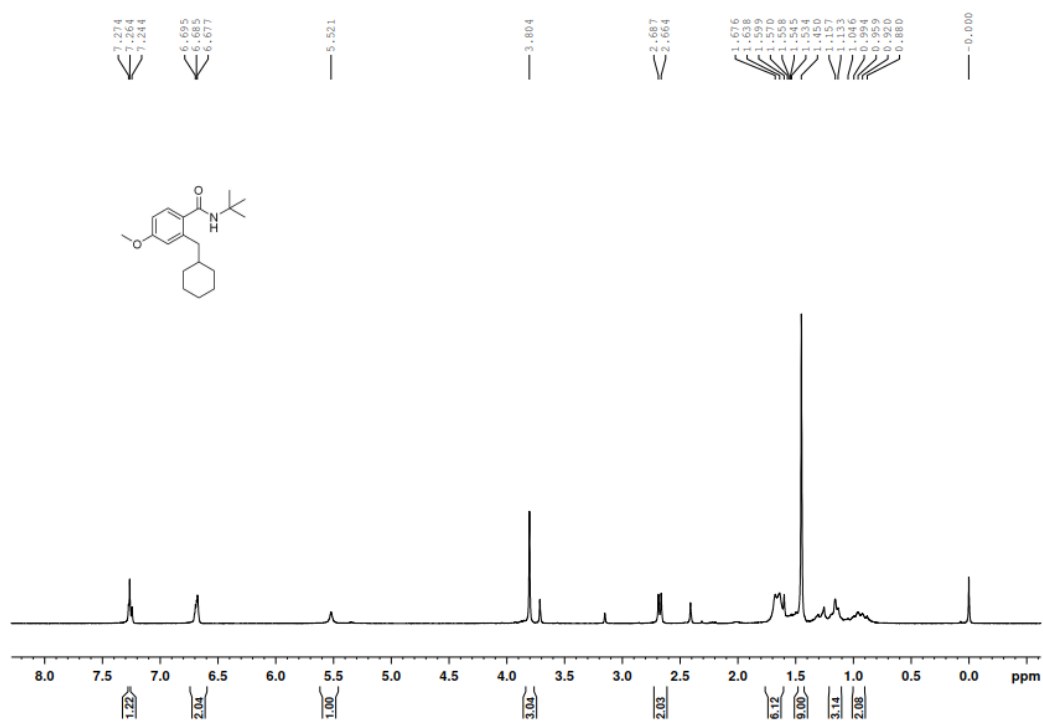

Supplementary Figure 143. <sup>1</sup>H NMR (300 MHz, CDCl<sub>3</sub>) spectra for compound 8e.

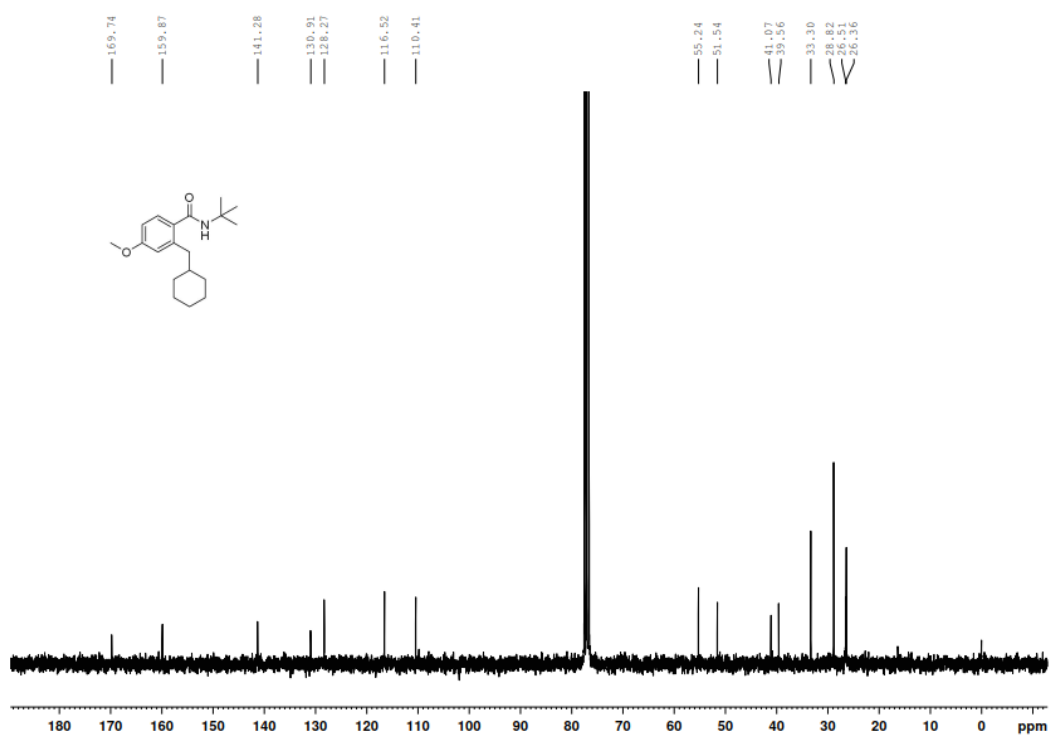

Supplementary Figure 144. <sup>13</sup>C NMR (75 MHz, CDCl<sub>3</sub>) spectra for compound 8e.

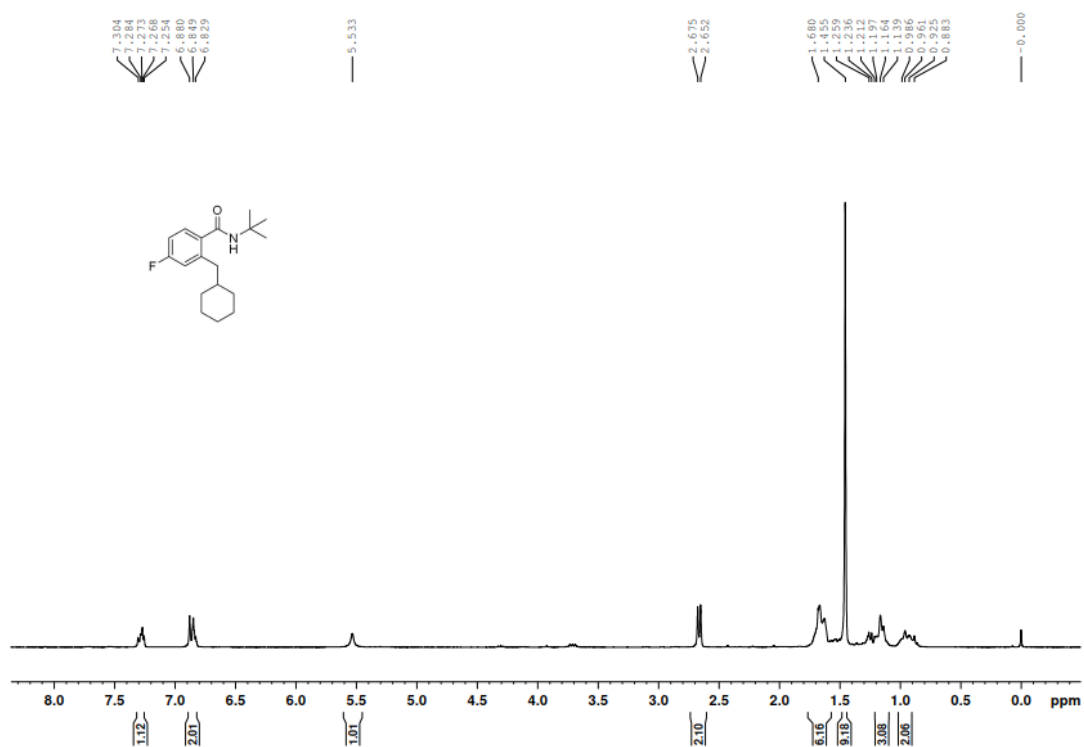

Supplementary Figure 145. <sup>1</sup>H NMR (300 MHz, CDCl<sub>3</sub>) spectra for compound 8f.

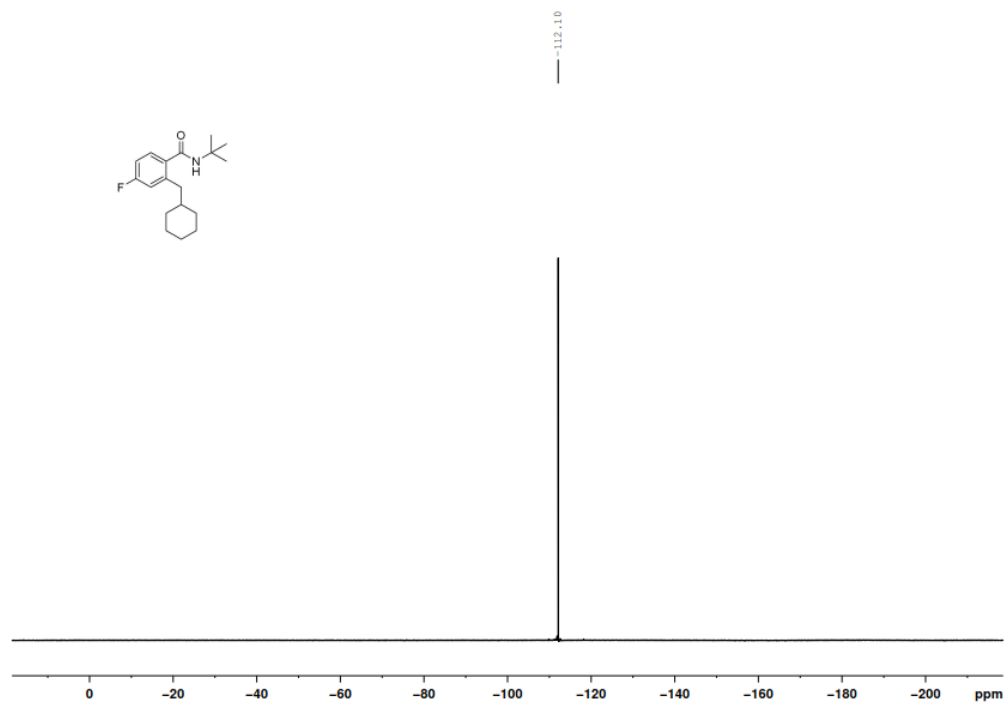

Supplementary Figure 146.  $^{19}\text{F}$  NMR (282 MHz,  $\text{CDCl}_3$ ) spectra for compound 8f.

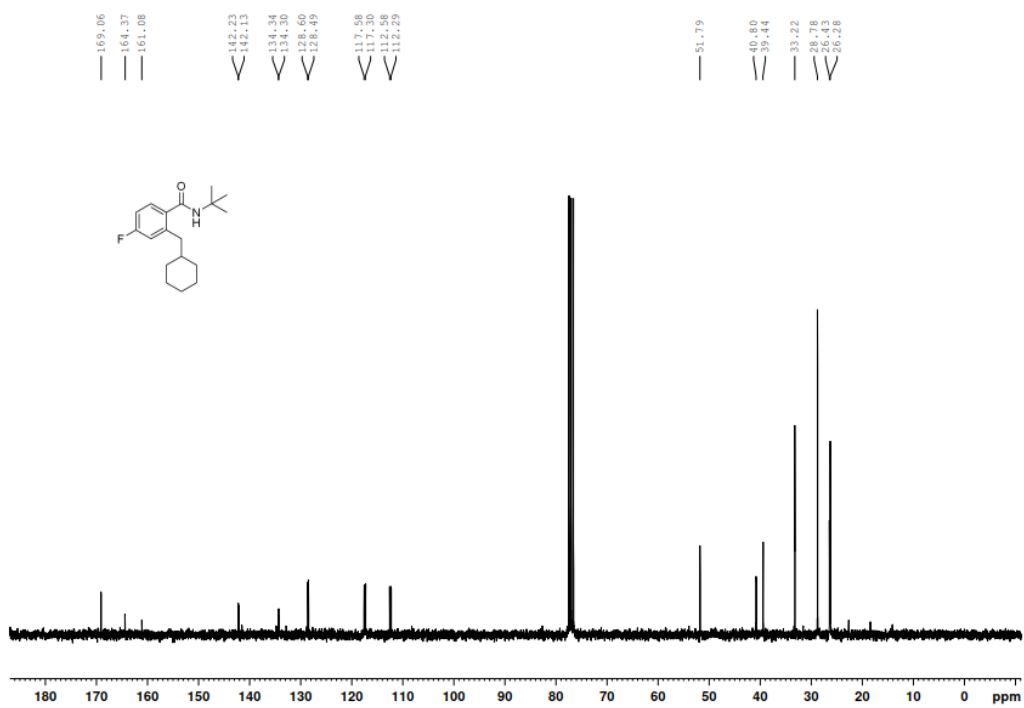

Supplementary Figure 147.  $^{13}\text{C}$  NMR (75 MHz,  $\text{CDCl}_3$ ) spectra for compound 8f.

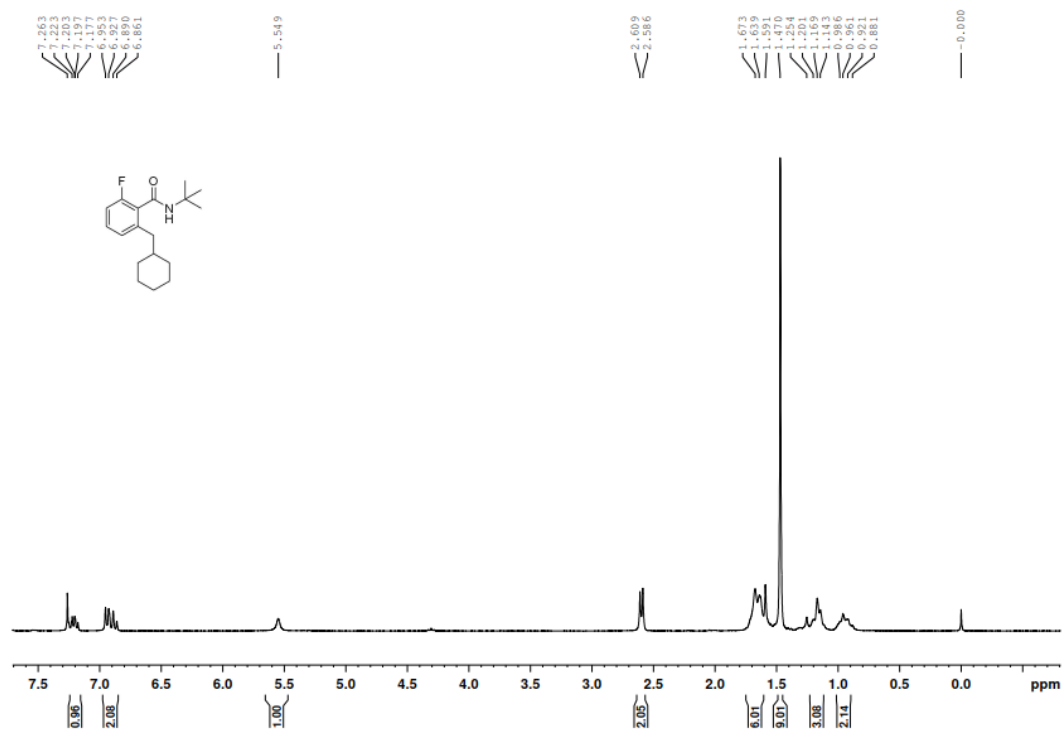

Supplementary Figure 148. <sup>1</sup>H NMR (300 MHz, CDCl<sub>3</sub>) spectra for compound 8g.

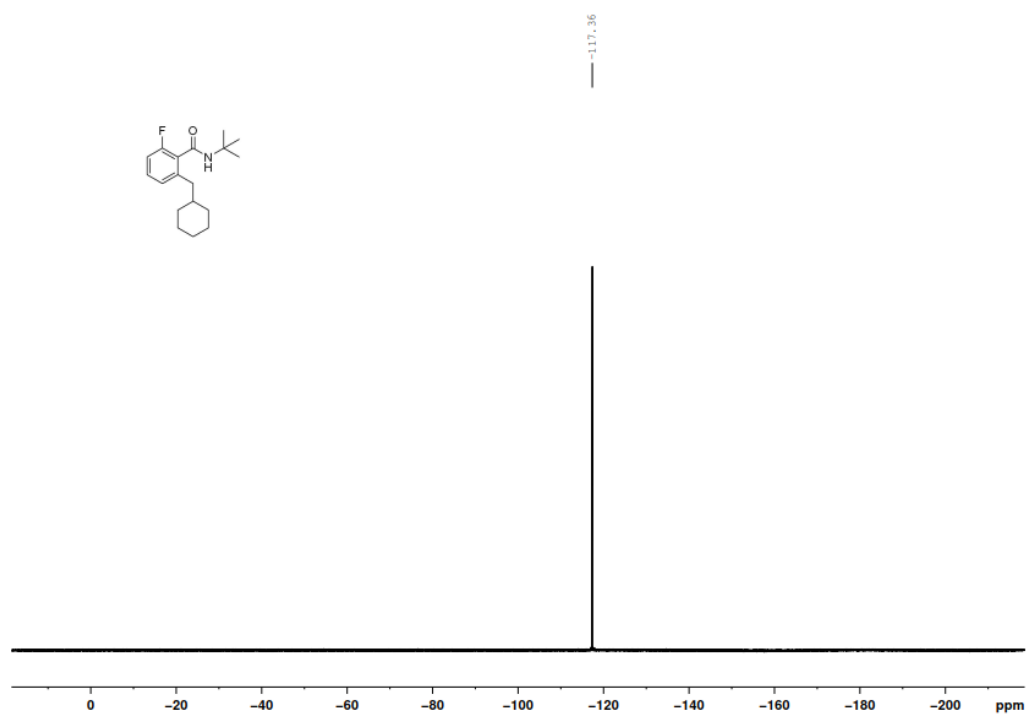

Supplementary Figure 149. <sup>19</sup>F NMR (282 MHz, CDCl<sub>3</sub>) spectra for compound 8g.

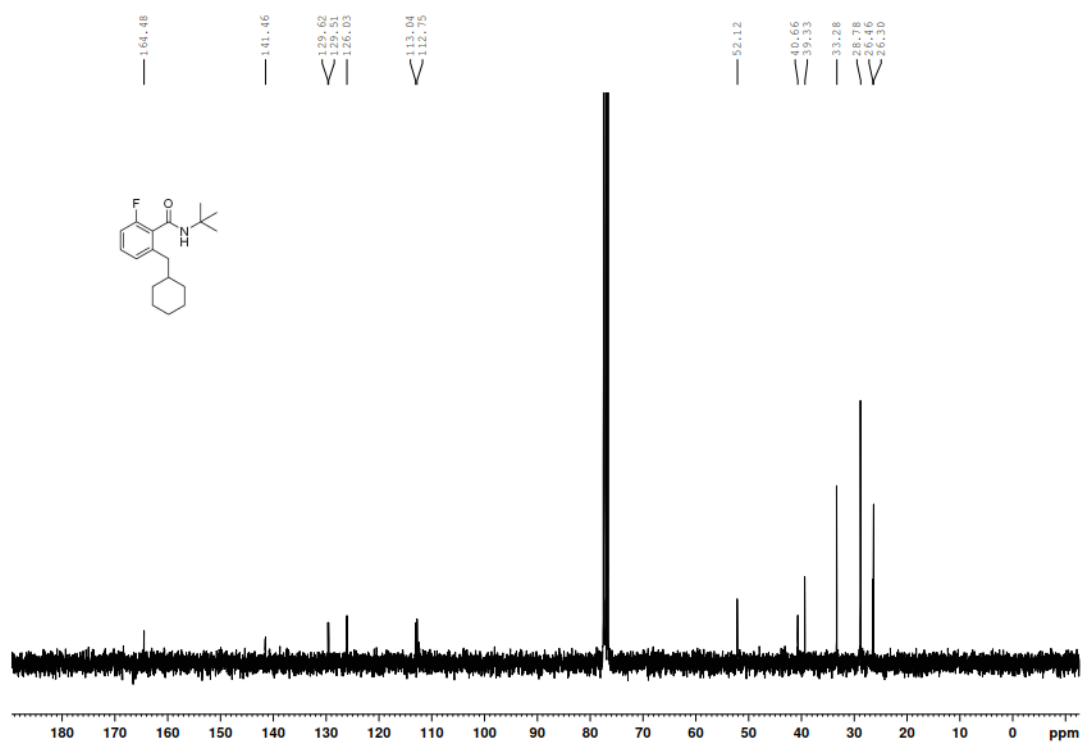

Supplementary Figure 150. <sup>13</sup>C NMR (75 MHz, CDCl<sub>3</sub>) spectra for compound 8g.

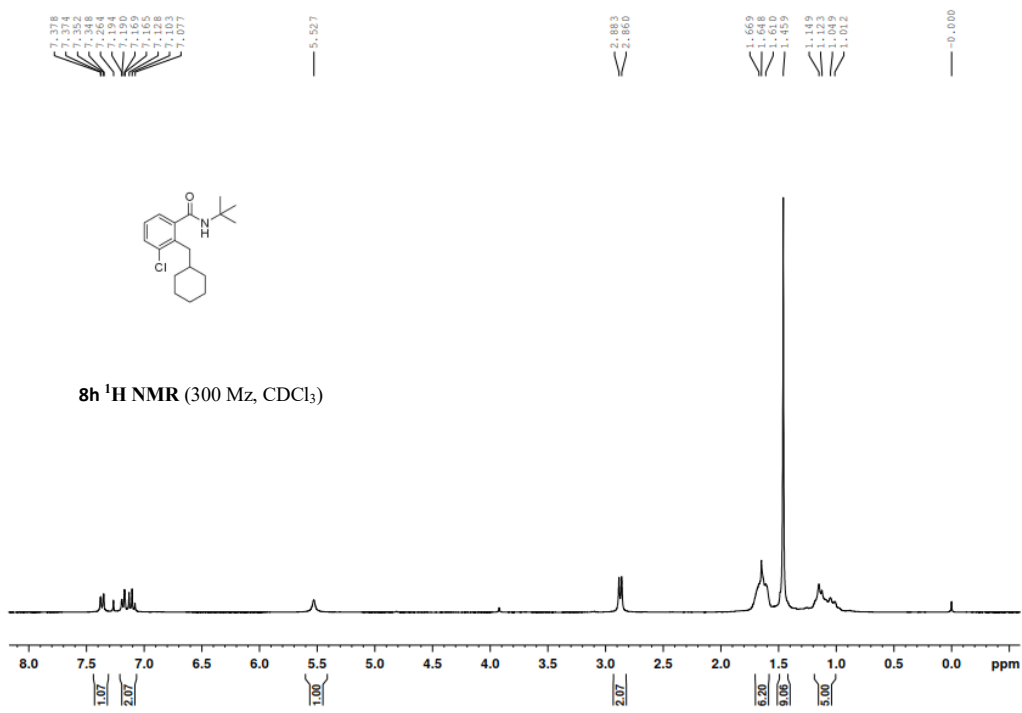

Supplementary Figure 151. <sup>1</sup>H NMR (300 MHz, CDCl<sub>3</sub>) spectra for compound 8h.

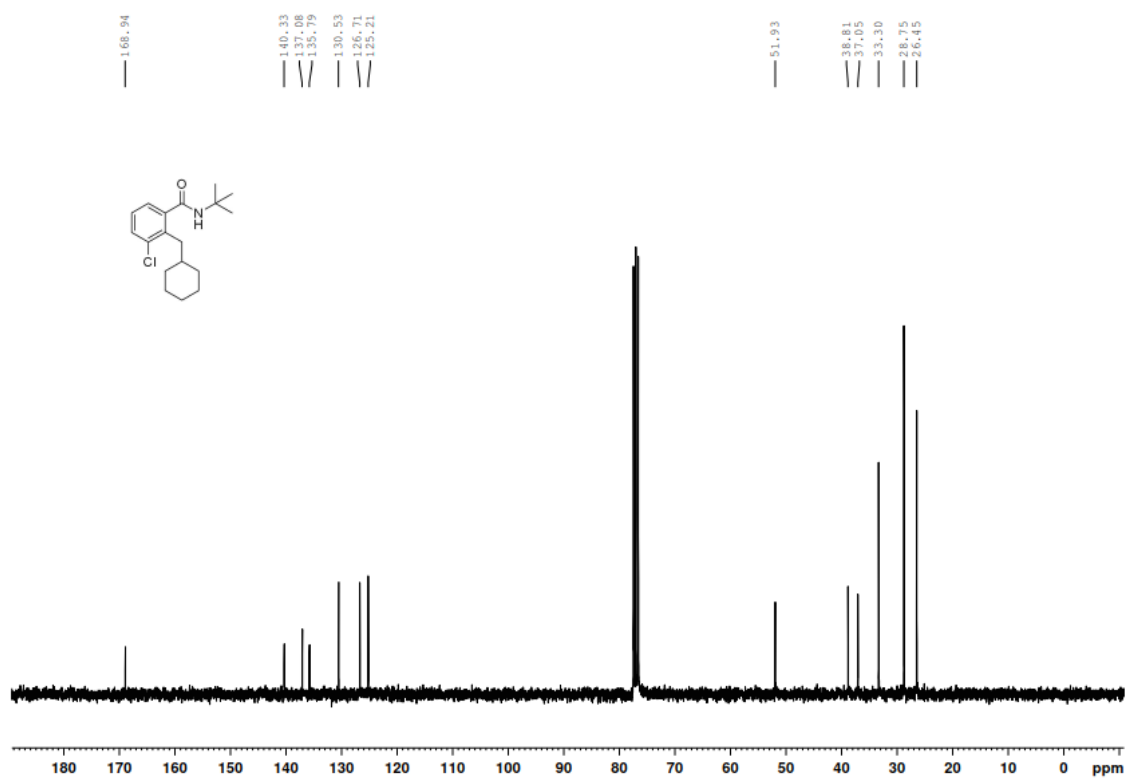

Supplementary Figure 152. <sup>13</sup>C NMR (75 MHz, CDCl<sub>3</sub>) spectra for compound **8h**.

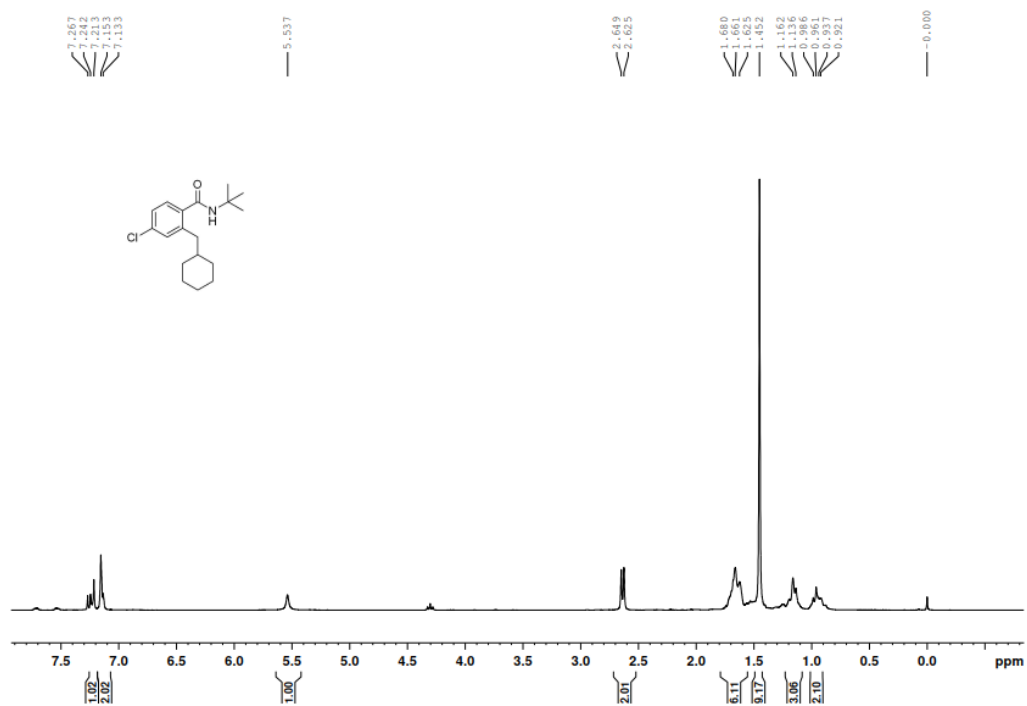

Supplementary Figure 153. <sup>1</sup>H NMR (300 MHz, CDCl<sub>3</sub>) spectra for compound **8i**.

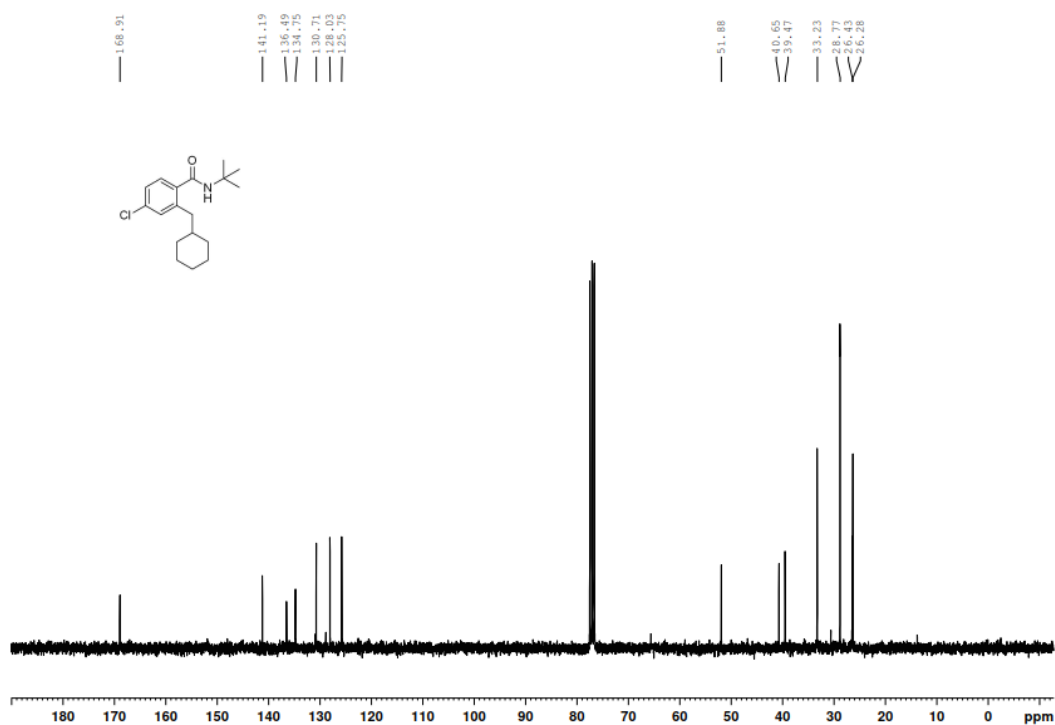

Supplementary Figure 154. <sup>13</sup>C NMR (75 MHz, CDCl<sub>3</sub>) spectra for compound 8i.

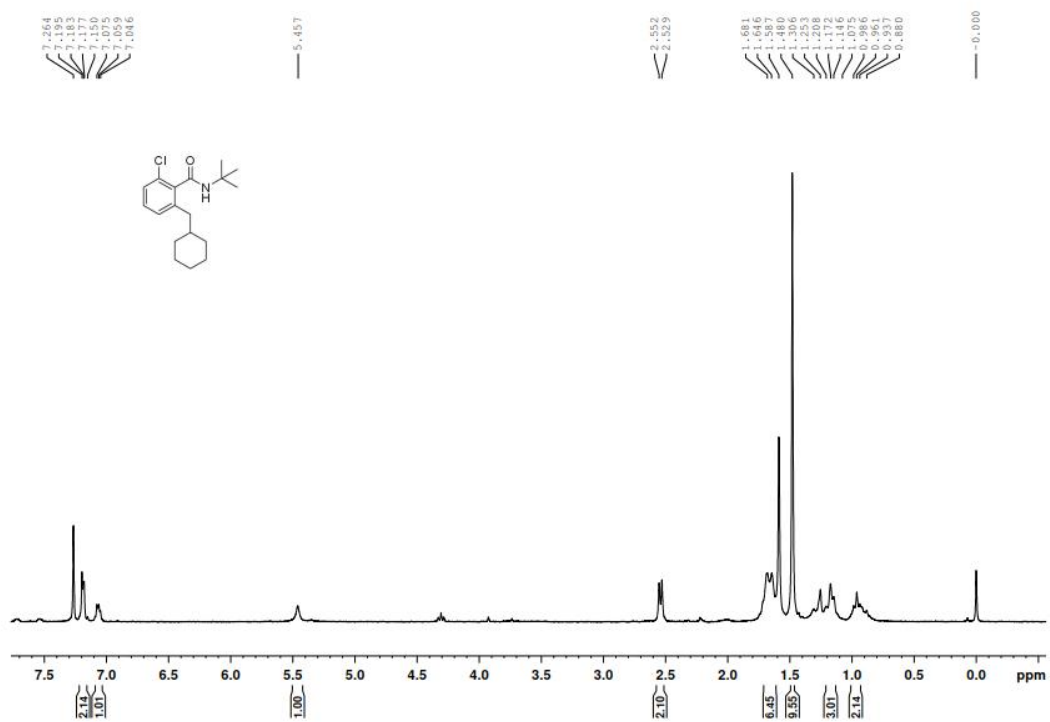

Supplementary Figure 155. <sup>1</sup>H NMR (300 MHz, CDCl<sub>3</sub>) spectra for compound 8j.



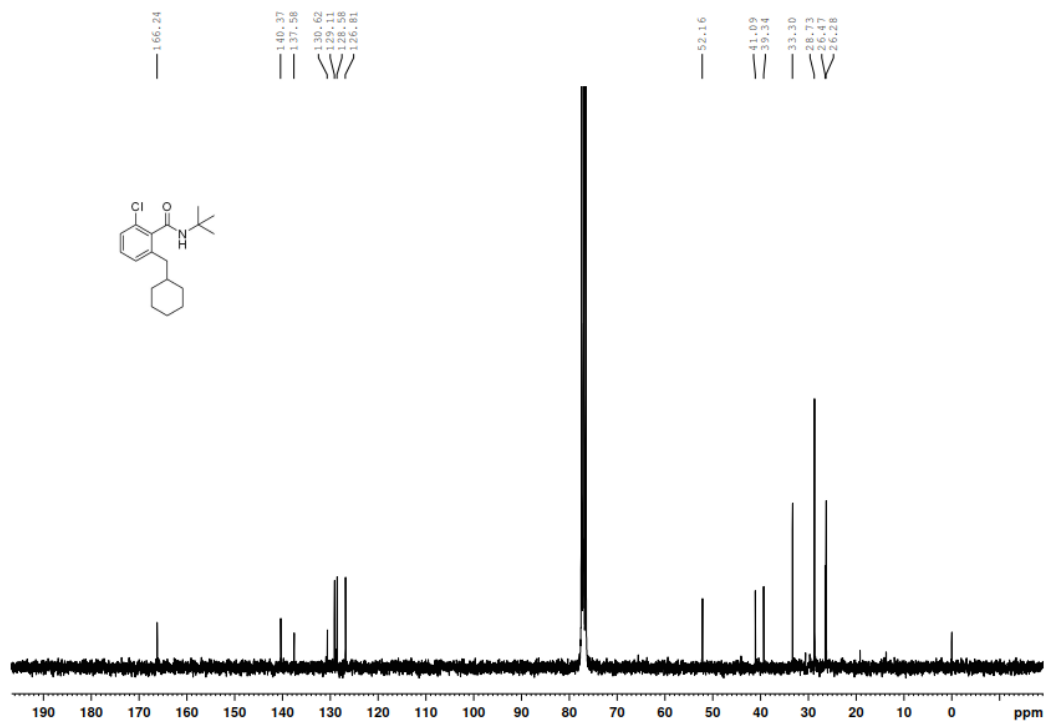

Supplementary Figure 156. <sup>13</sup>C NMR (75 MHz, CDCl<sub>3</sub>) spectra for compound **8j**.

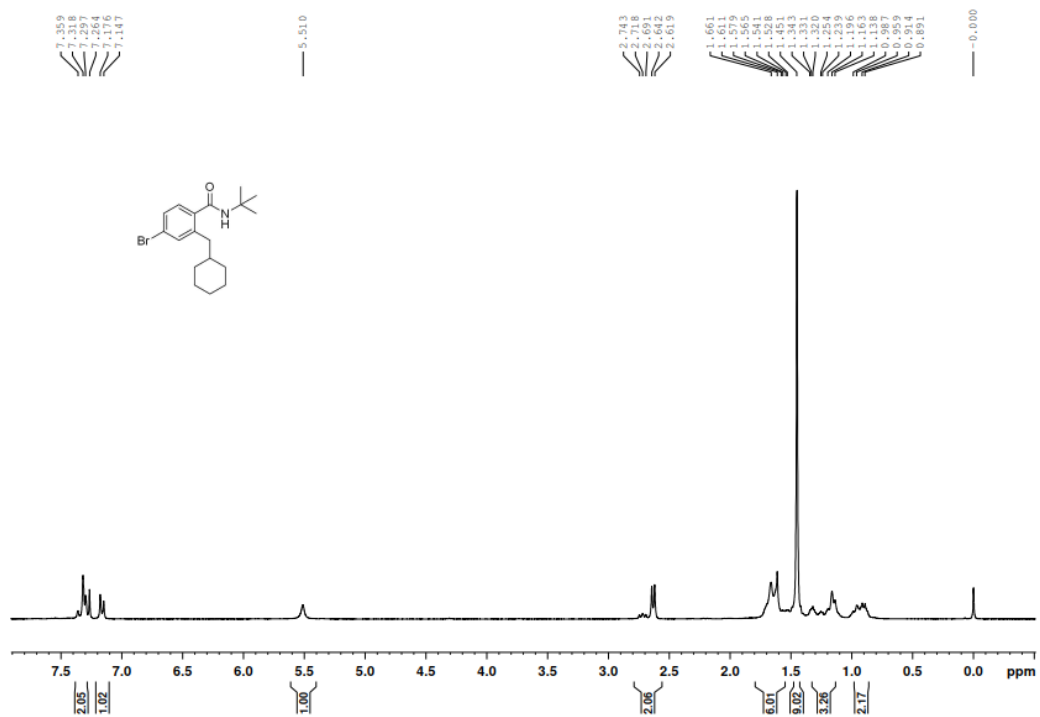

Supplementary Figure 157. <sup>1</sup>H NMR (300 MHz, CDCl<sub>3</sub>) spectra for compound **8k**.

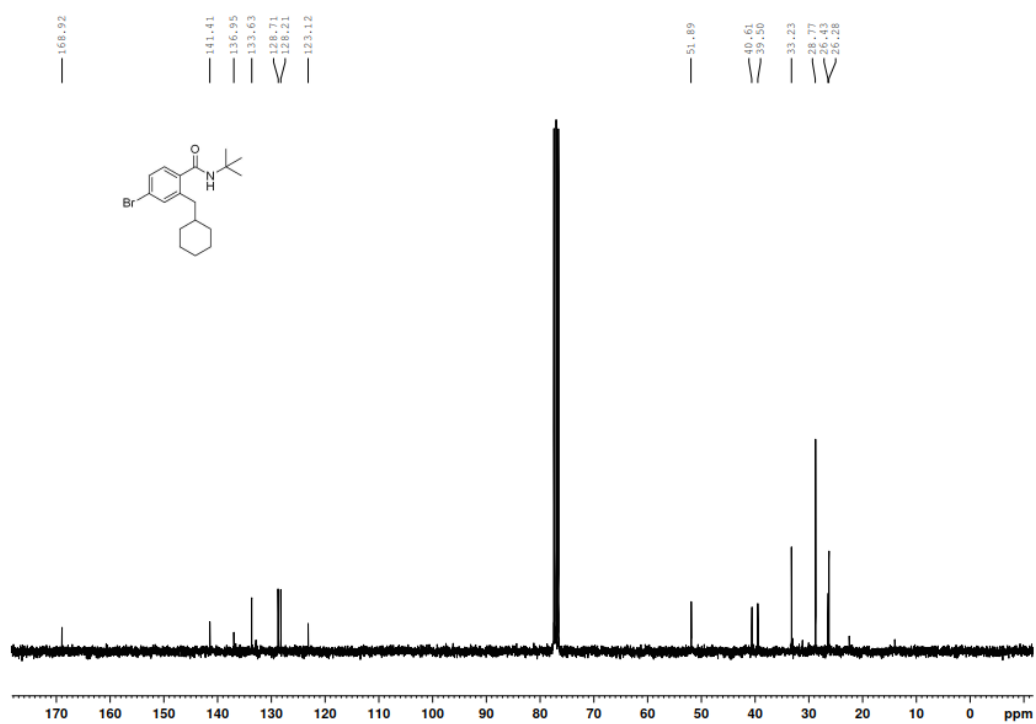

Supplementary Figure 158. <sup>13</sup>C NMR (75 MHz, CDCl<sub>3</sub>) spectra for compound **8k**.

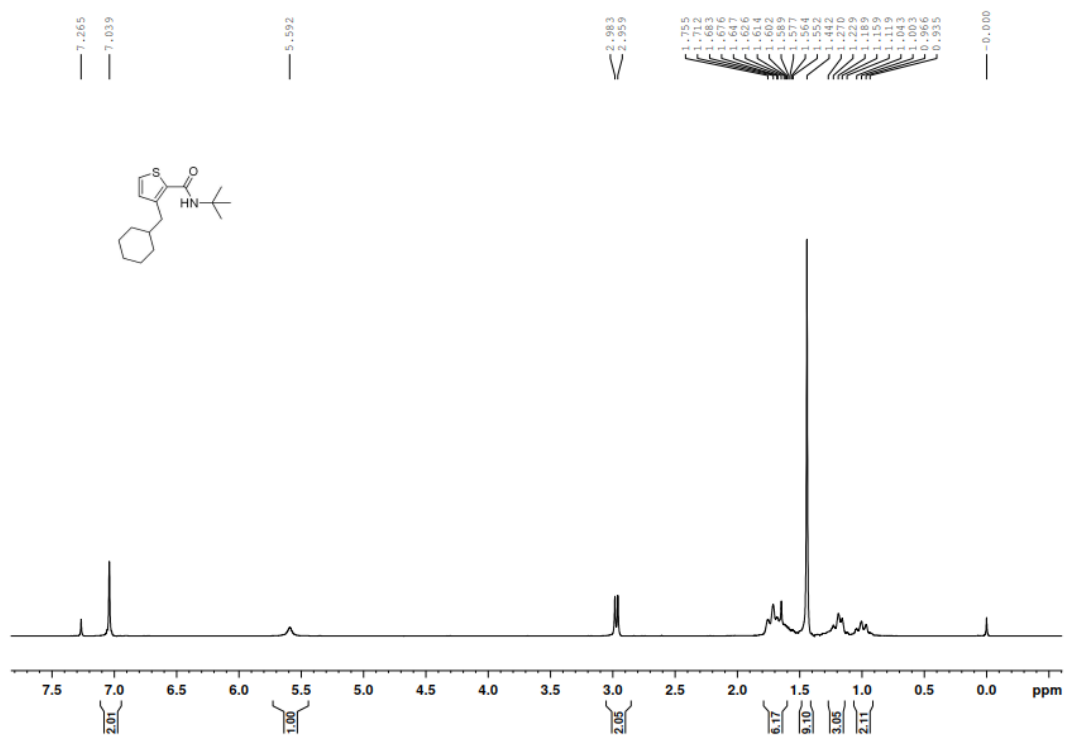

Supplementary Figure 159. <sup>1</sup>H NMR (300 MHz, CDCl<sub>3</sub>) spectra for compound **8l**.

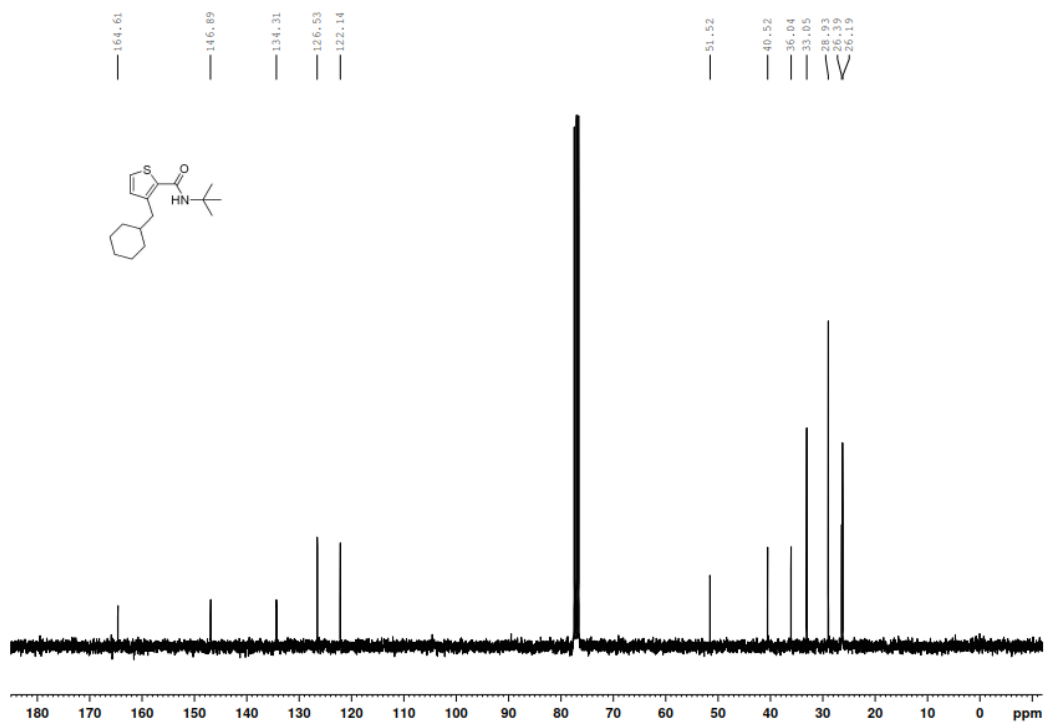

Supplementary Figure 160. <sup>13</sup>C NMR (75 MHz, CDCl<sub>3</sub>) spectra for compound 8l.

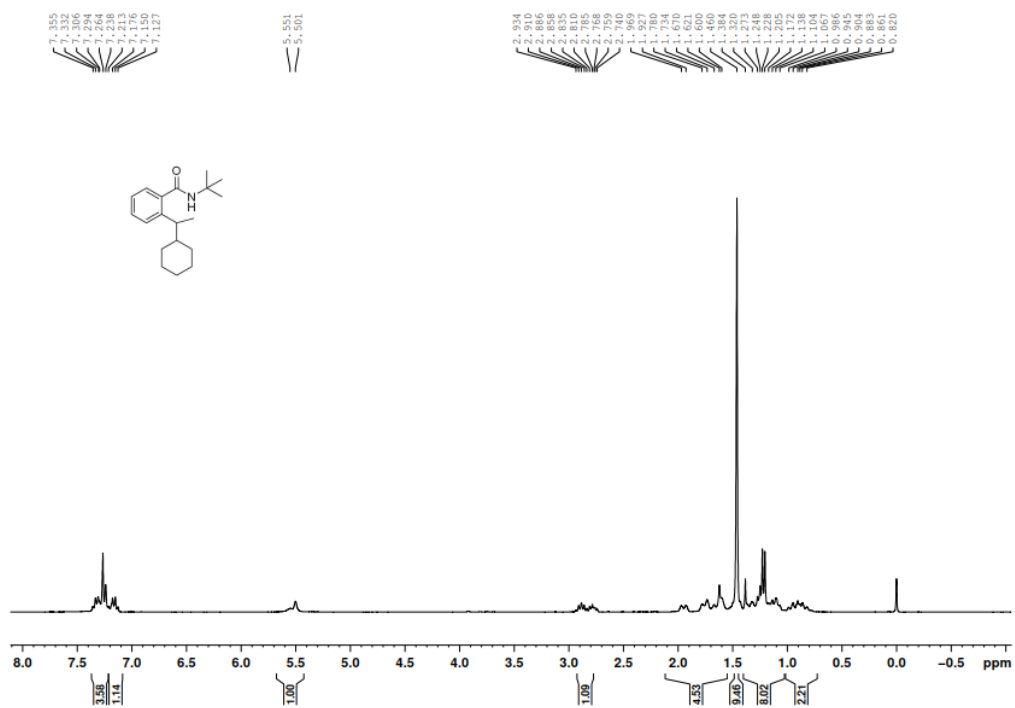

Supplementary Figure 161. <sup>1</sup>H NMR (300 MHz, CDCl<sub>3</sub>) spectra for compound 8m.

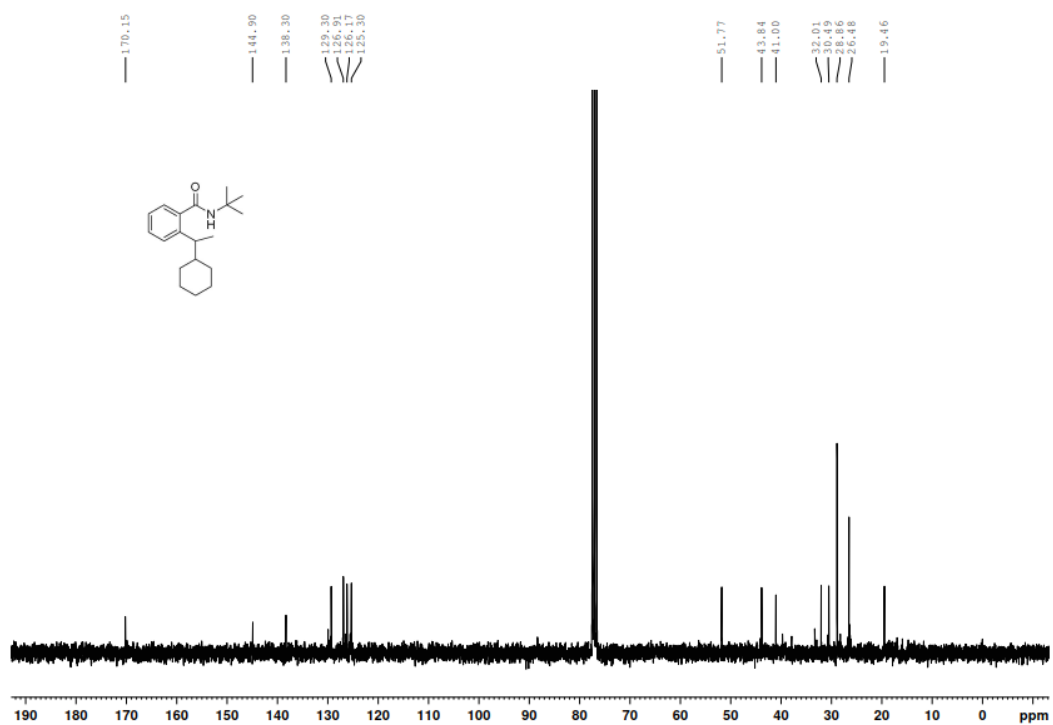

Supplementary Figure 162. <sup>13</sup>C NMR (75 MHz, CDCl<sub>3</sub>) spectra for compound 8m.

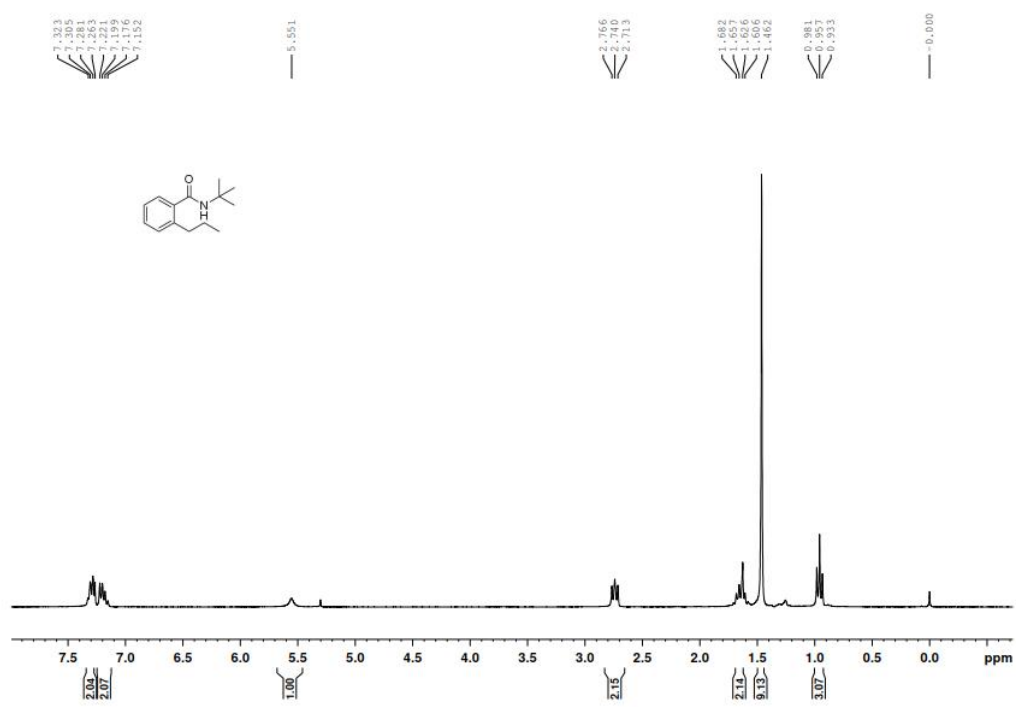

Supplementary Figure 163. <sup>1</sup>H NMR (300 MHz, CDCl<sub>3</sub>) spectra for compound 9a.

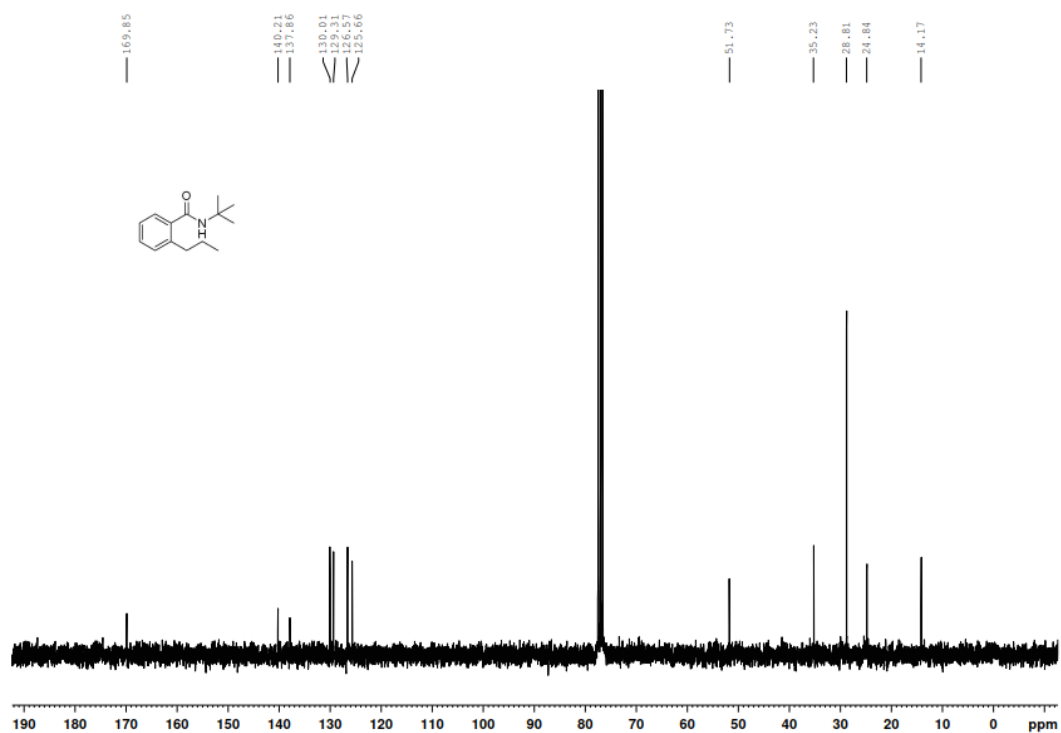

Supplementary Figure 164. <sup>13</sup>C NMR (75 MHz, CDCl<sub>3</sub>) spectra for compound 9a.

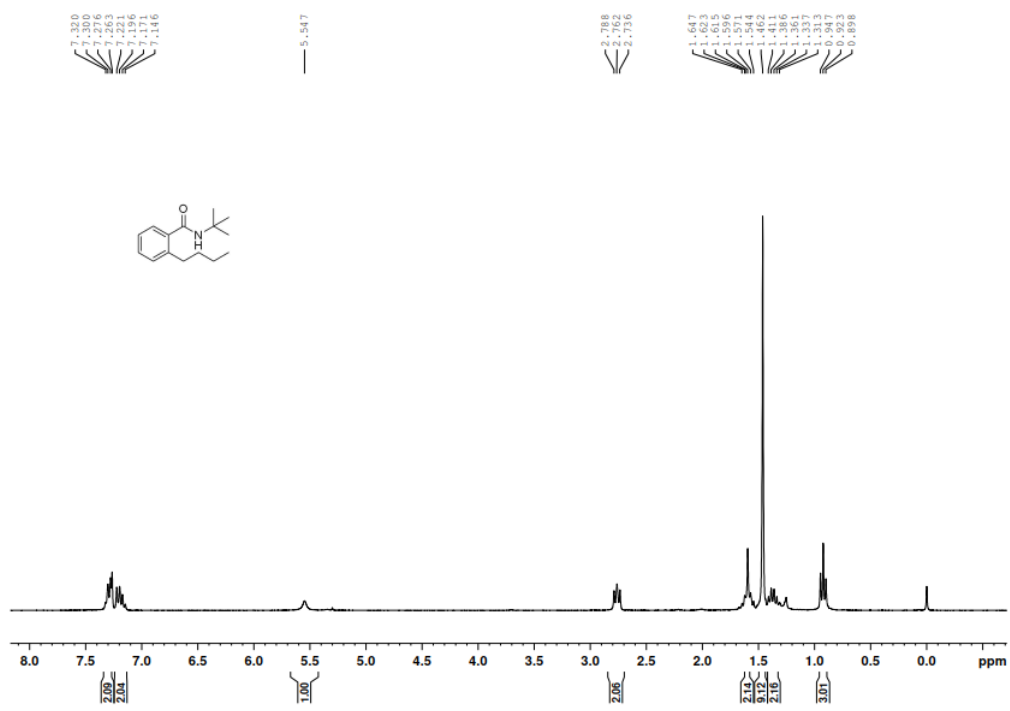

Supplementary Figure 165. <sup>1</sup>H NMR (300 MHz, CDCl<sub>3</sub>) spectra for compound 9b.

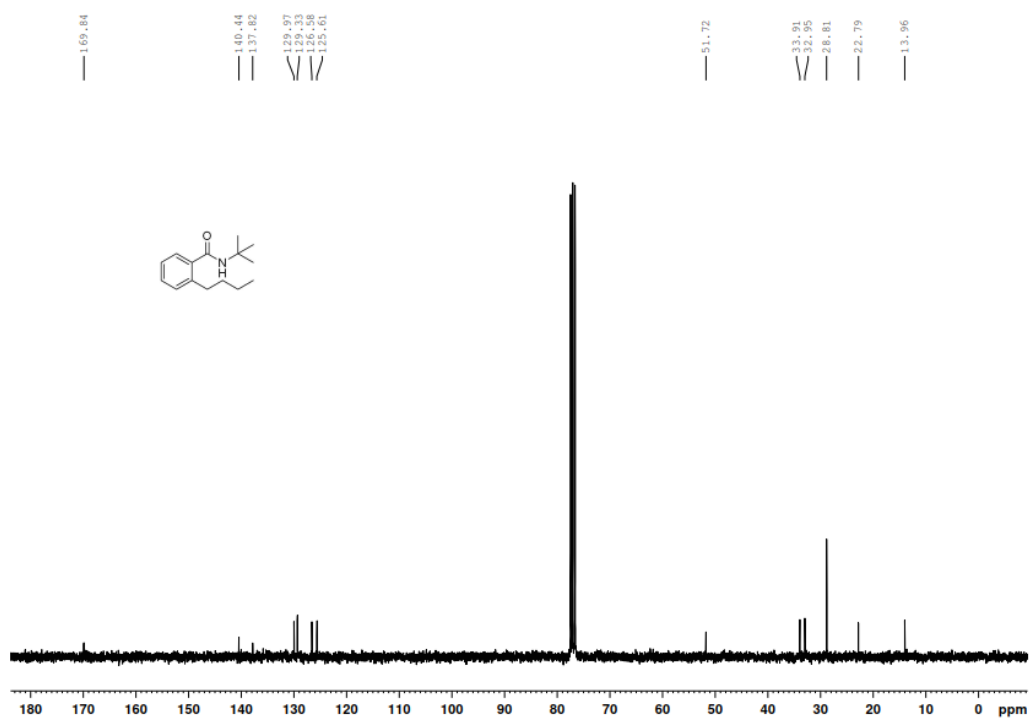

Supplementary Figure 166.  $^{13}\text{C}$  NMR (75 MHz,  $\text{CDCl}_3$ ) spectra for compound **9b**.

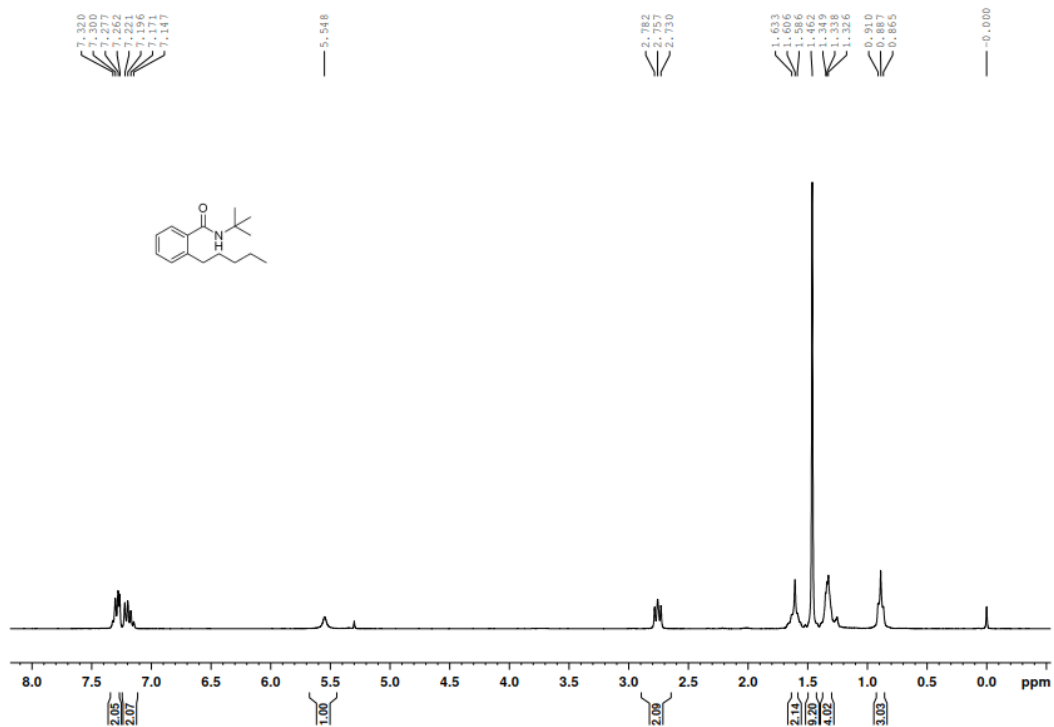

Supplementary Figure 167.  $^1\text{H}$  NMR (300 MHz,  $\text{CDCl}_3$ ) spectra for compound **9c**.

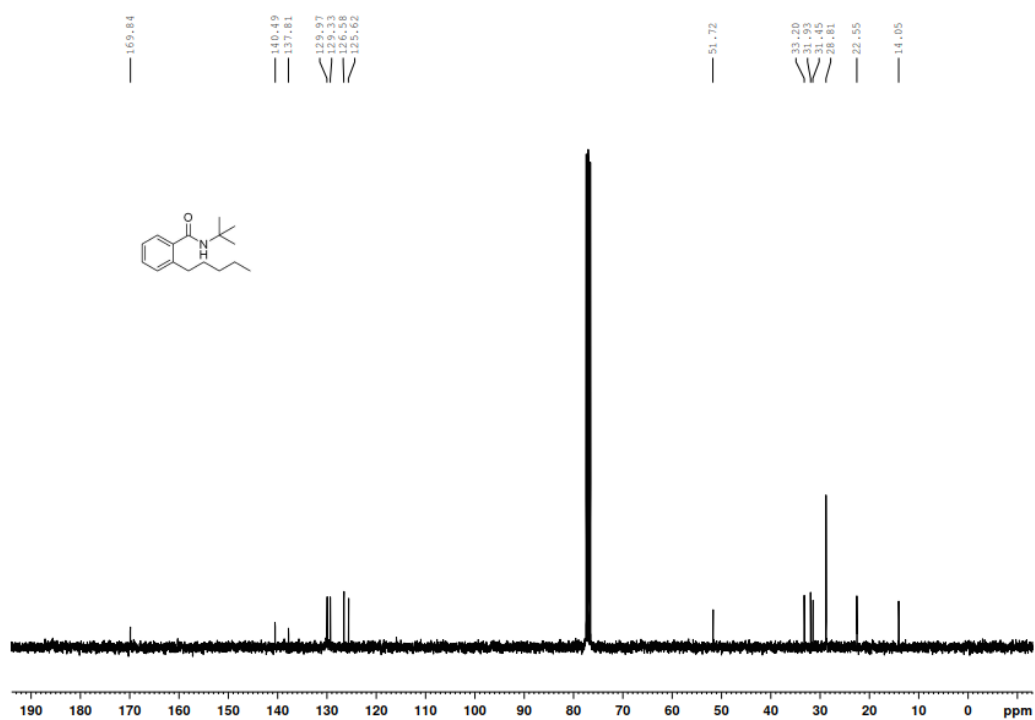

Supplementary Figure 168. <sup>13</sup>C NMR (75 MHz, CDCl<sub>3</sub>) spectra for compound 9c.

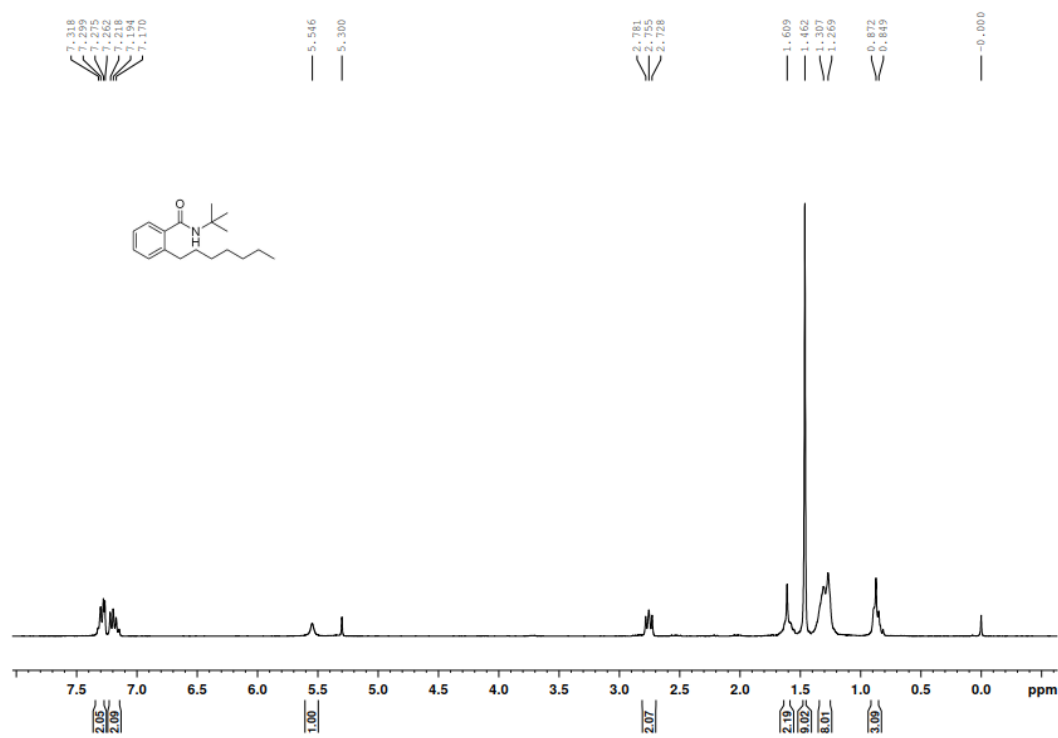

Supplementary Figure 169. <sup>1</sup>H NMR (300 MHz, CDCl<sub>3</sub>) spectra for compound 9d.

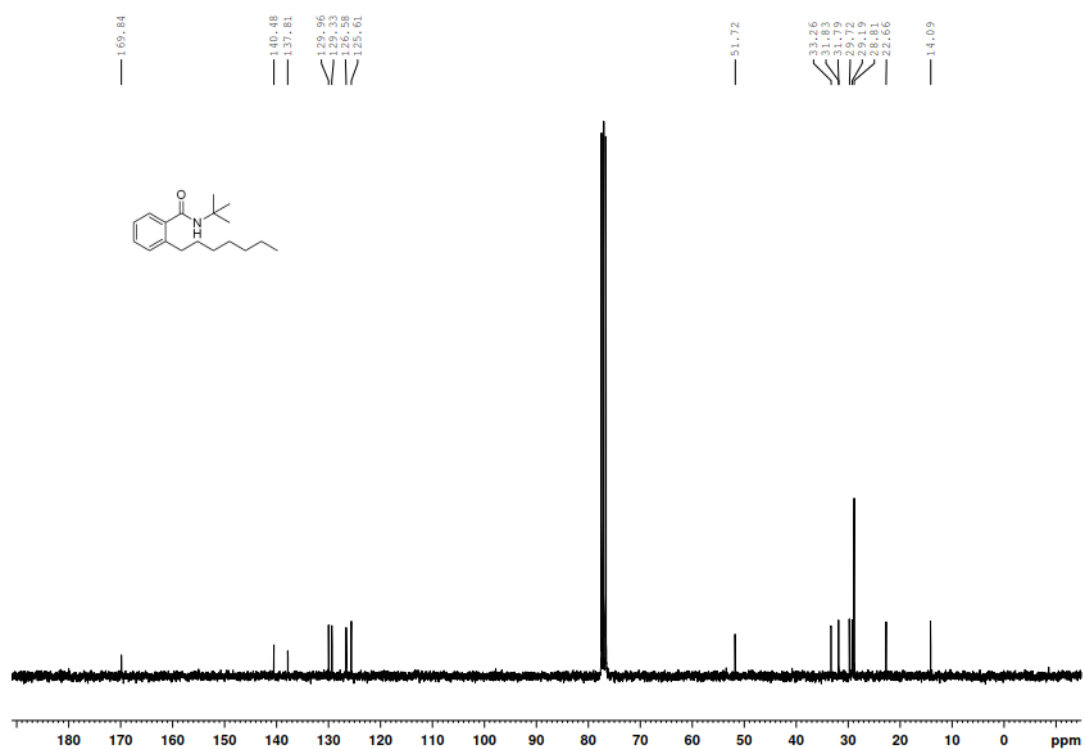

Supplementary Figure 170. <sup>13</sup>C NMR (75 MHz, CDCl<sub>3</sub>) spectra for compound 9d.

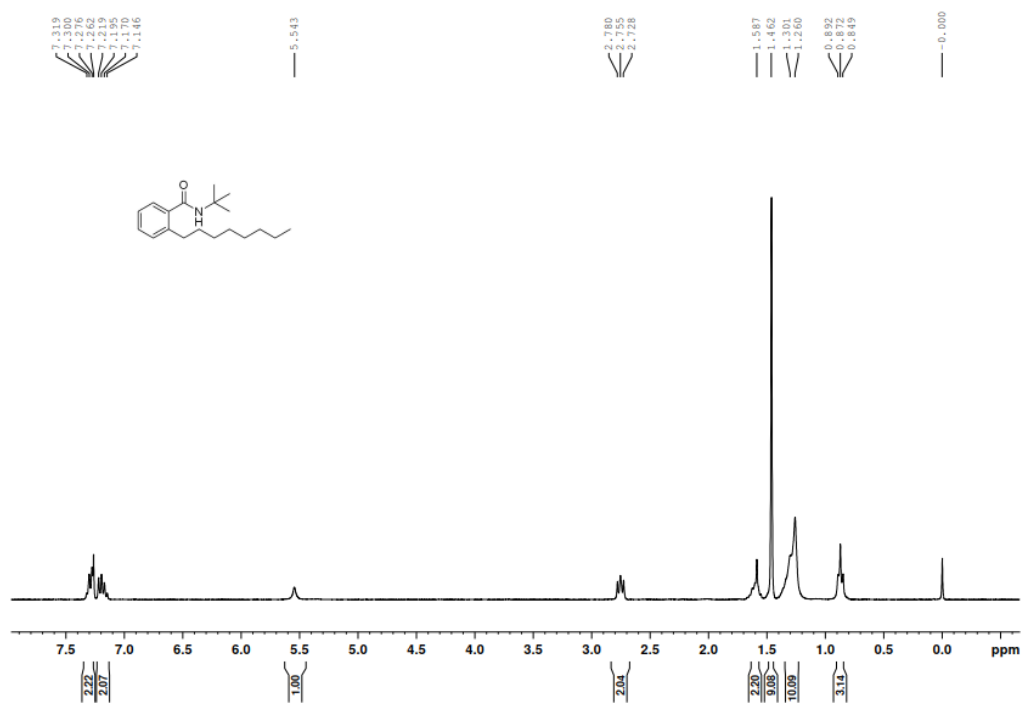

Supplementary Figure 171. <sup>1</sup>H NMR (300 MHz, CDCl<sub>3</sub>) spectra for compound 9e.



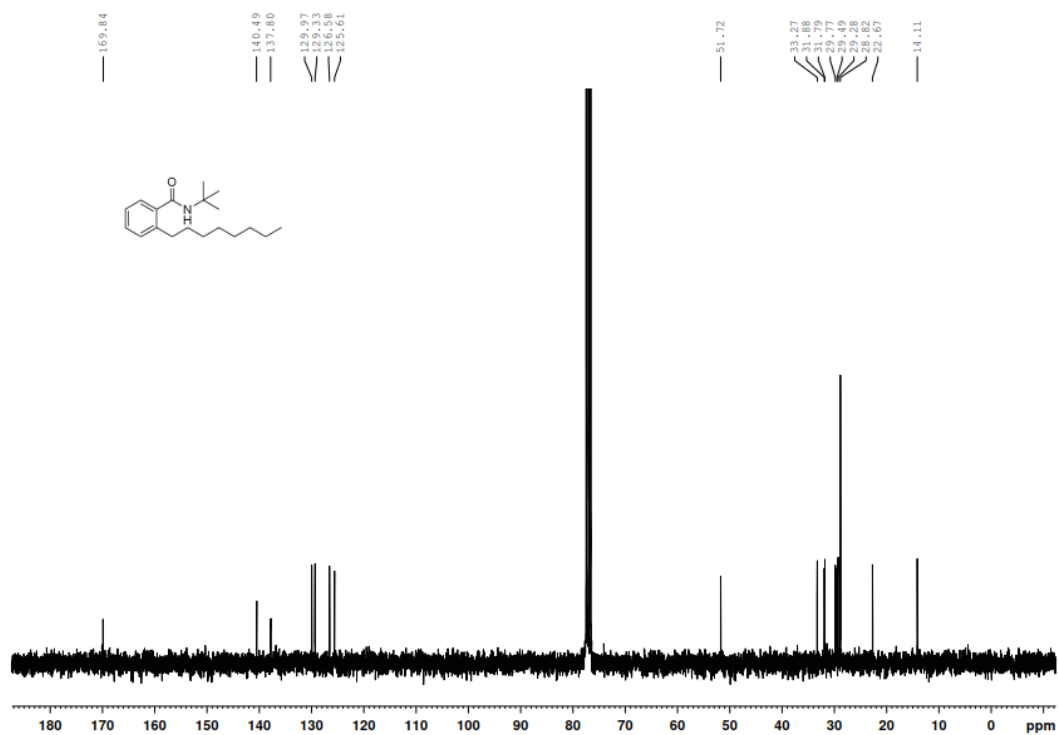

Supplementary Figure 172. <sup>13</sup>C NMR (75 MHz, CDCl<sub>3</sub>) spectra for compound 9e.

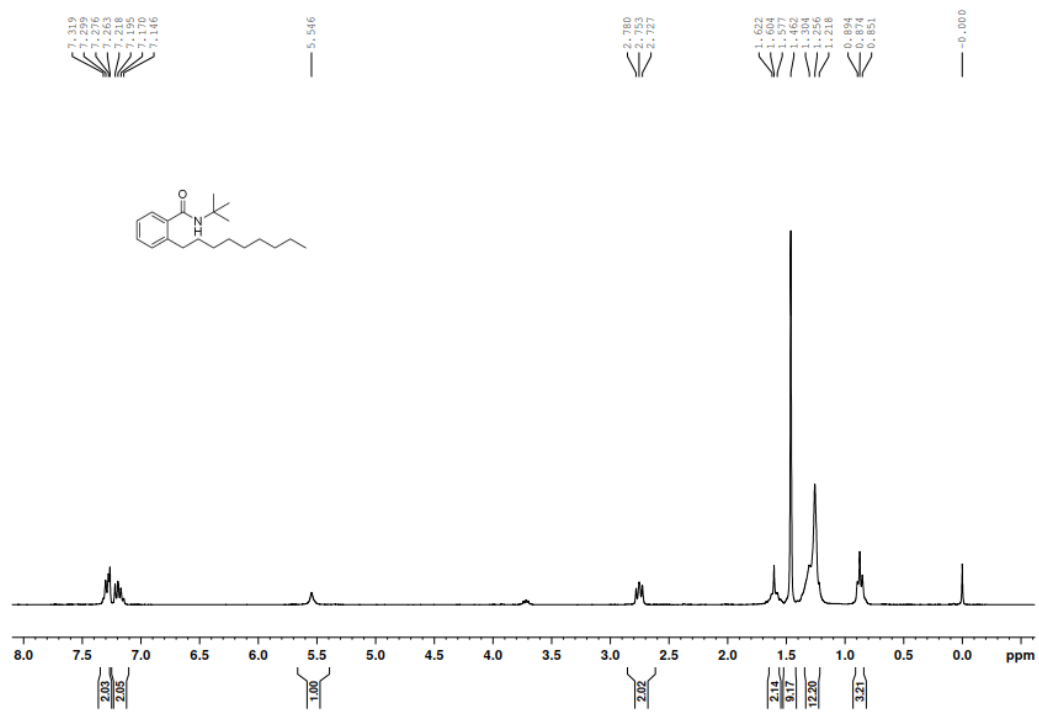

Supplementary Figure 173. <sup>1</sup>H NMR (300 MHz, CDCl<sub>3</sub>) spectra for compound 9f.

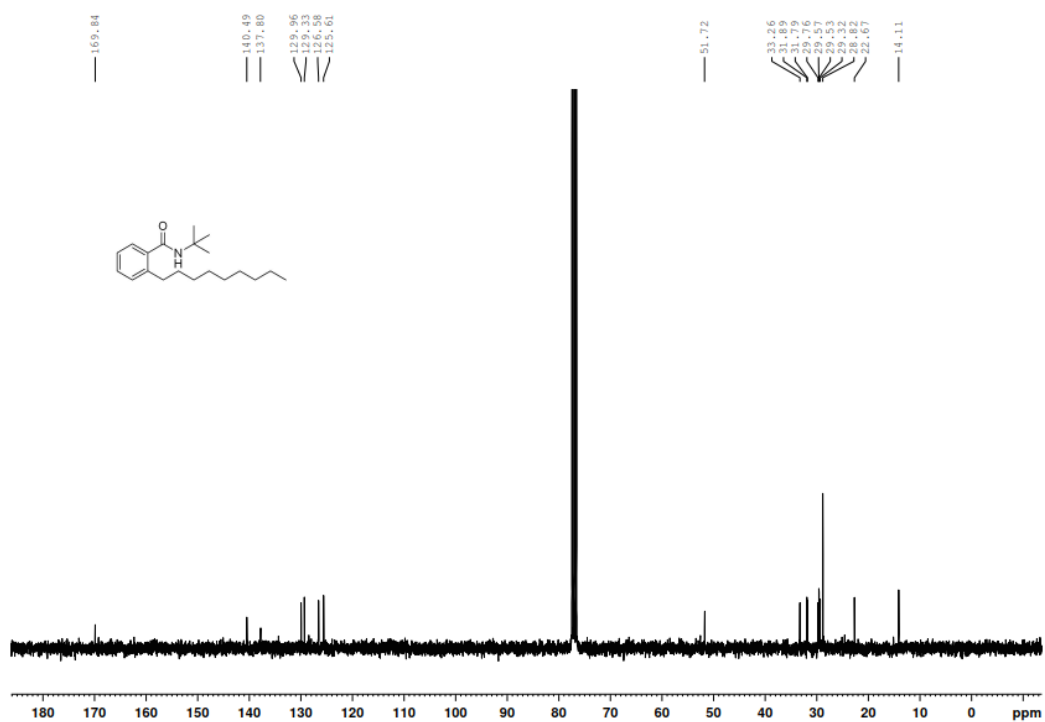

Supplementary Figure 174. <sup>13</sup>C NMR (75 MHz, CDCl<sub>3</sub>) spectra for compound 9f.

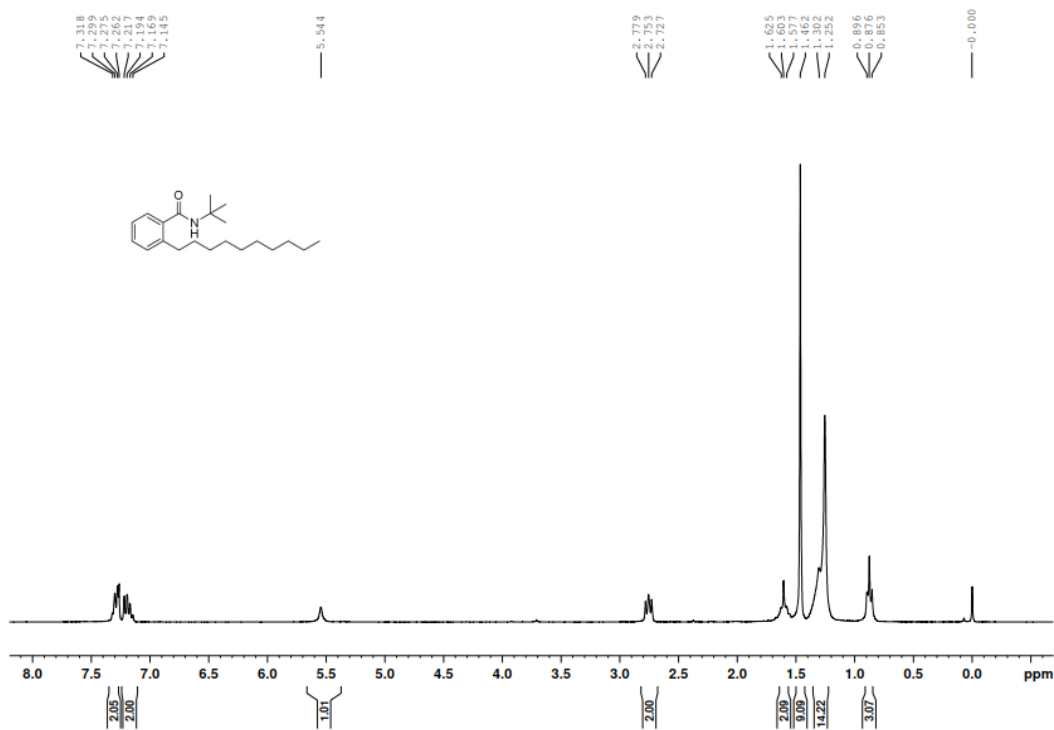

Supplementary Figure 175. <sup>1</sup>H NMR (300 MHz, CDCl<sub>3</sub>) spectra for compound 9g.

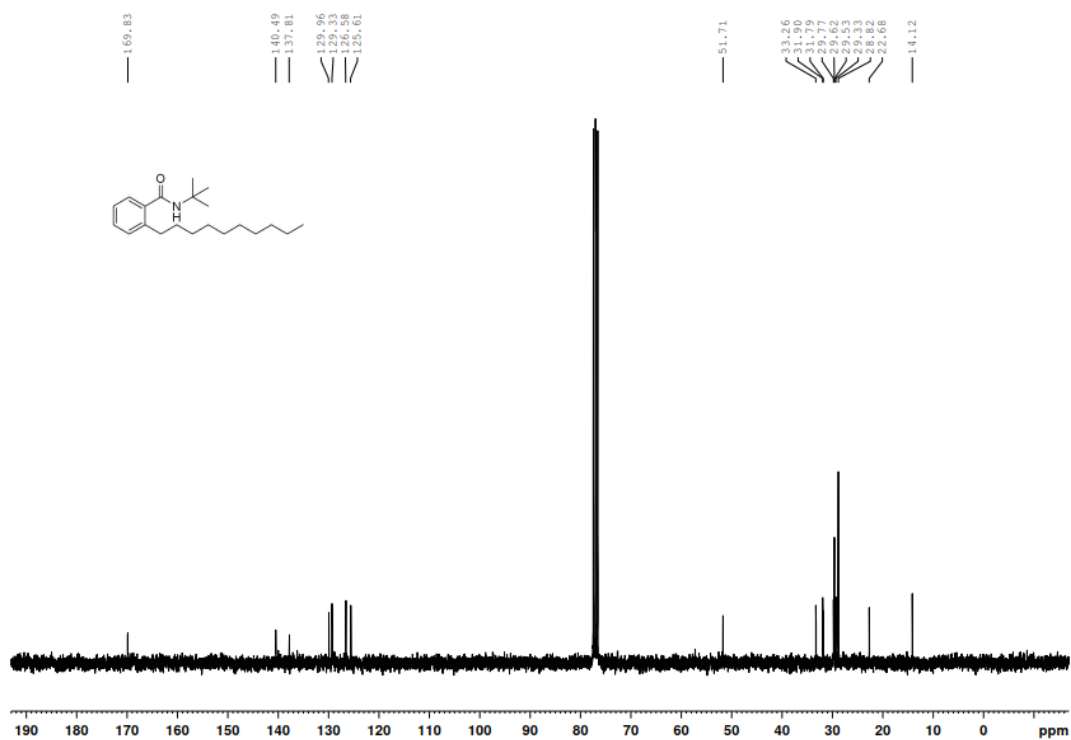

Supplementary Figure 176. <sup>13</sup>C NMR (75 MHz, CDCl<sub>3</sub>) spectra for compound 9g.

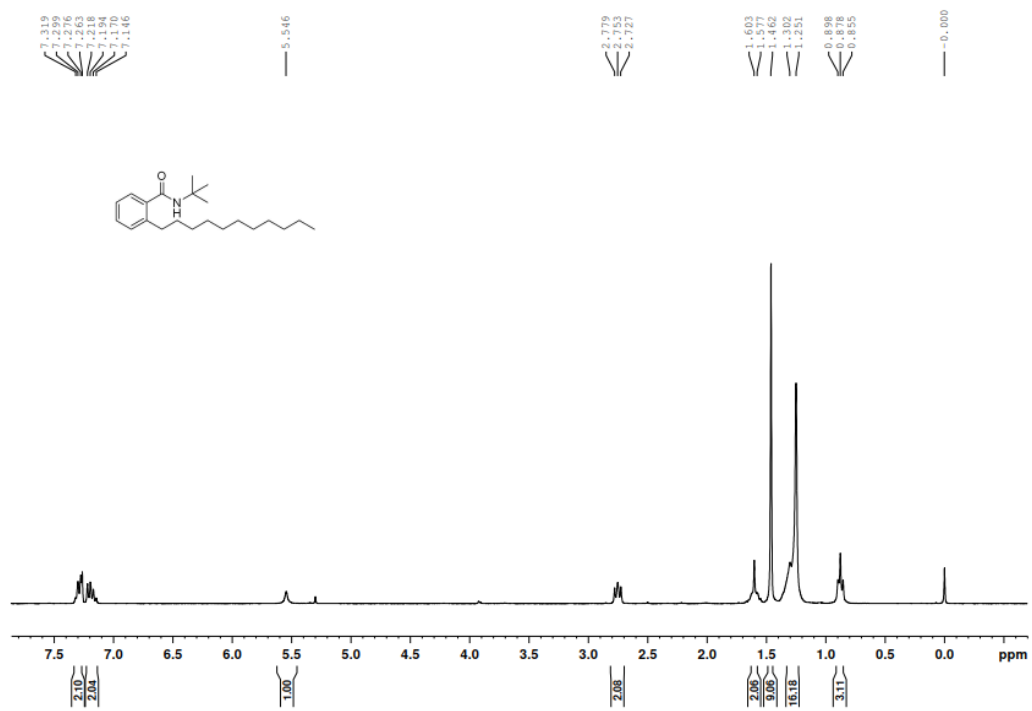

Supplementary Figure 177. <sup>1</sup>H NMR (300 MHz, CDCl<sub>3</sub>) spectra for compound 9h.

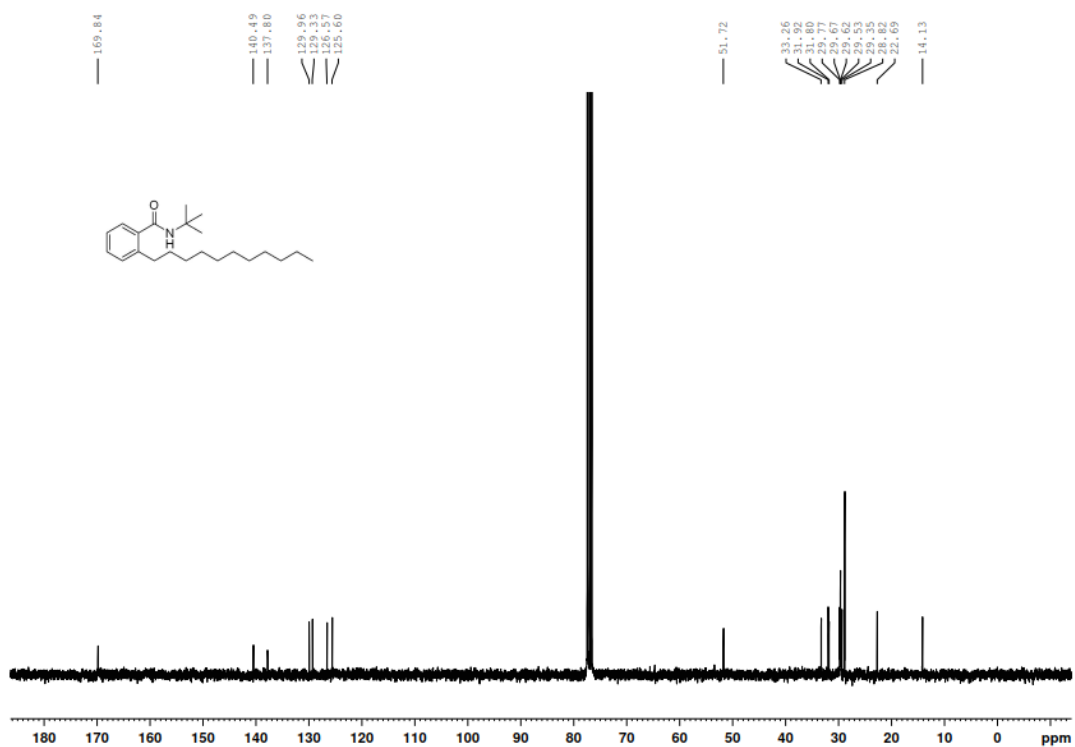

Supplementary Figure 178. <sup>13</sup>C NMR (75 MHz, CDCl<sub>3</sub>) spectra for compound 9h.

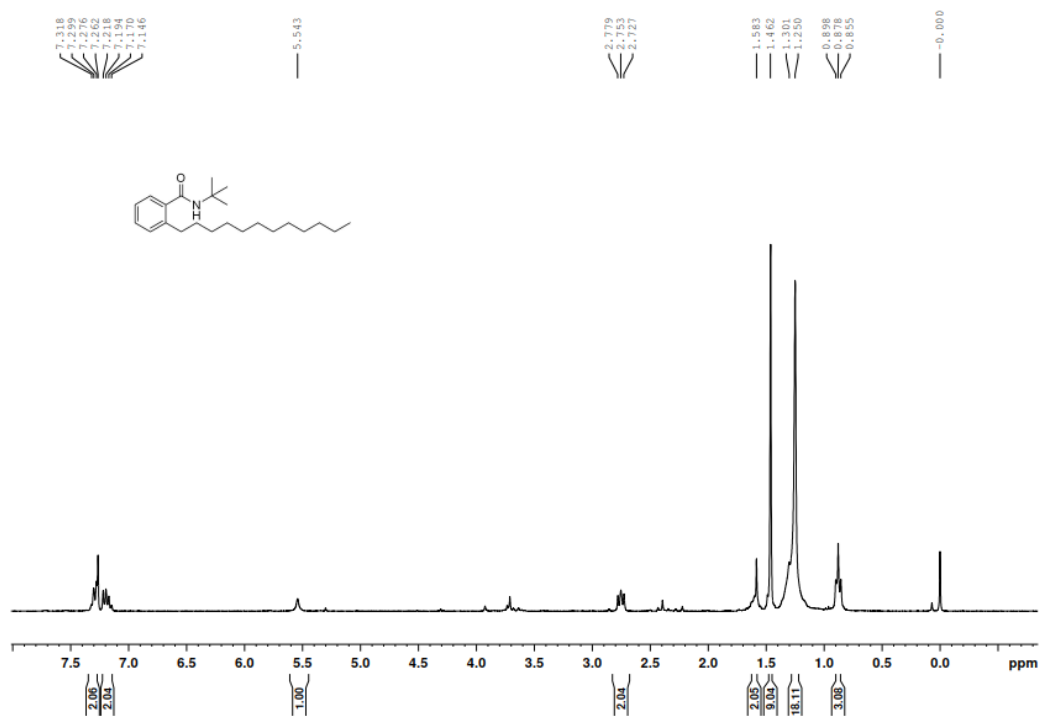

Supplementary Figure 179. <sup>1</sup>H NMR (300 MHz, CDCl<sub>3</sub>) spectra for compound 9i.

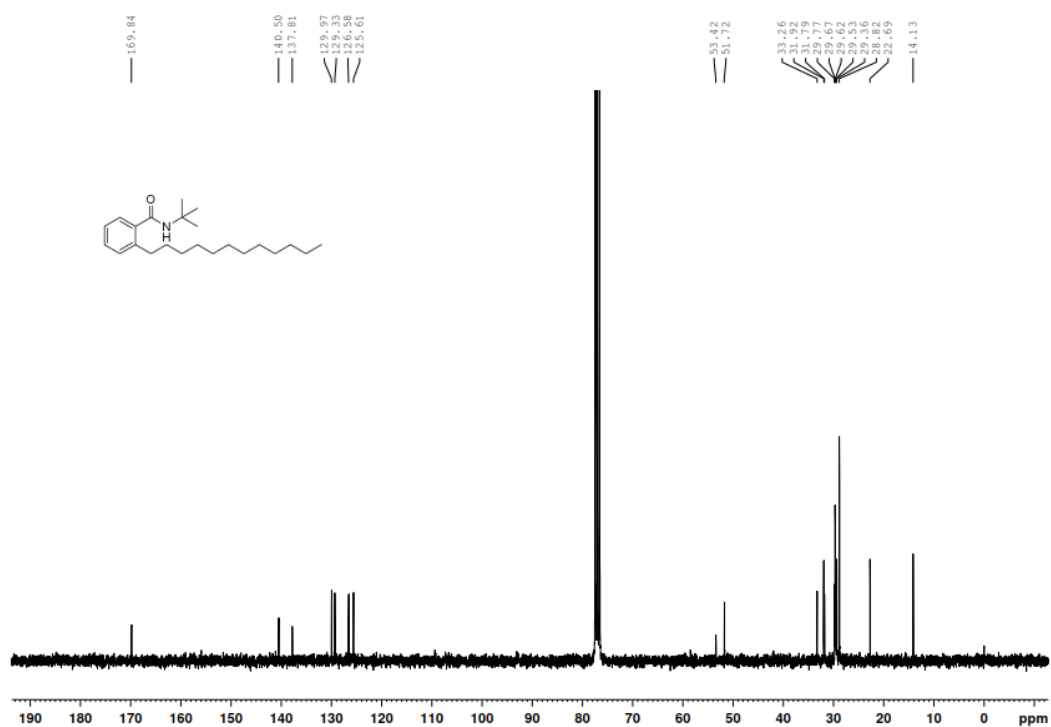

Supplementary Figure 180. <sup>13</sup>C NMR (75 MHz, CDCl<sub>3</sub>) spectra for compound 9i.

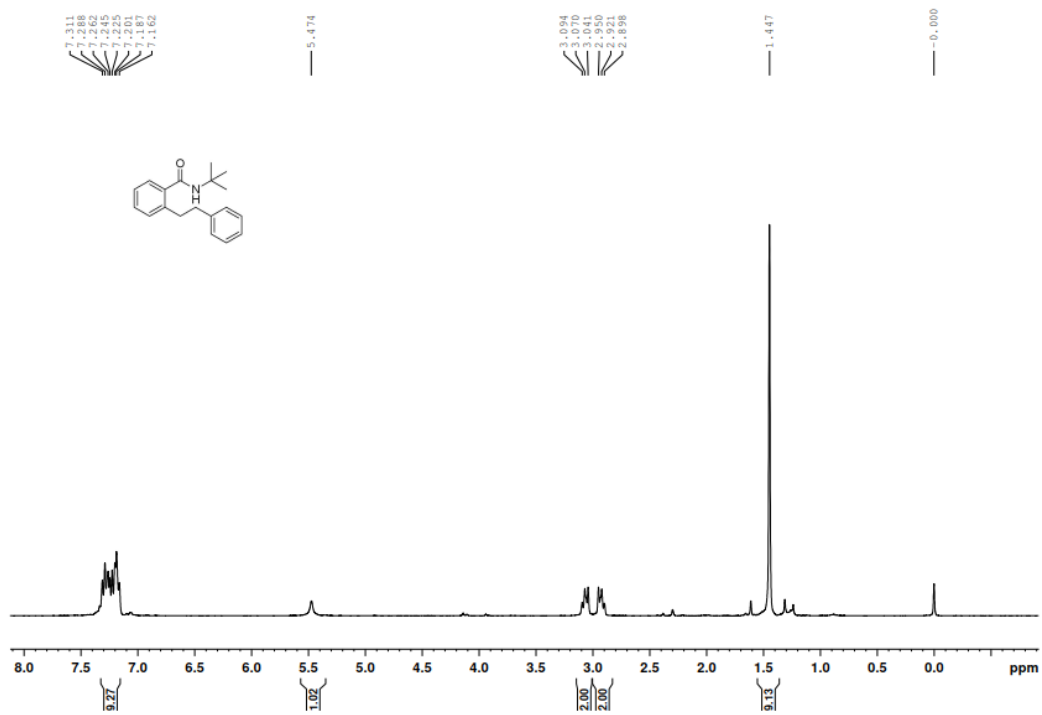

Supplementary Figure 181. <sup>1</sup>H NMR (300 MHz, CDCl<sub>3</sub>) spectra for compound 9j.

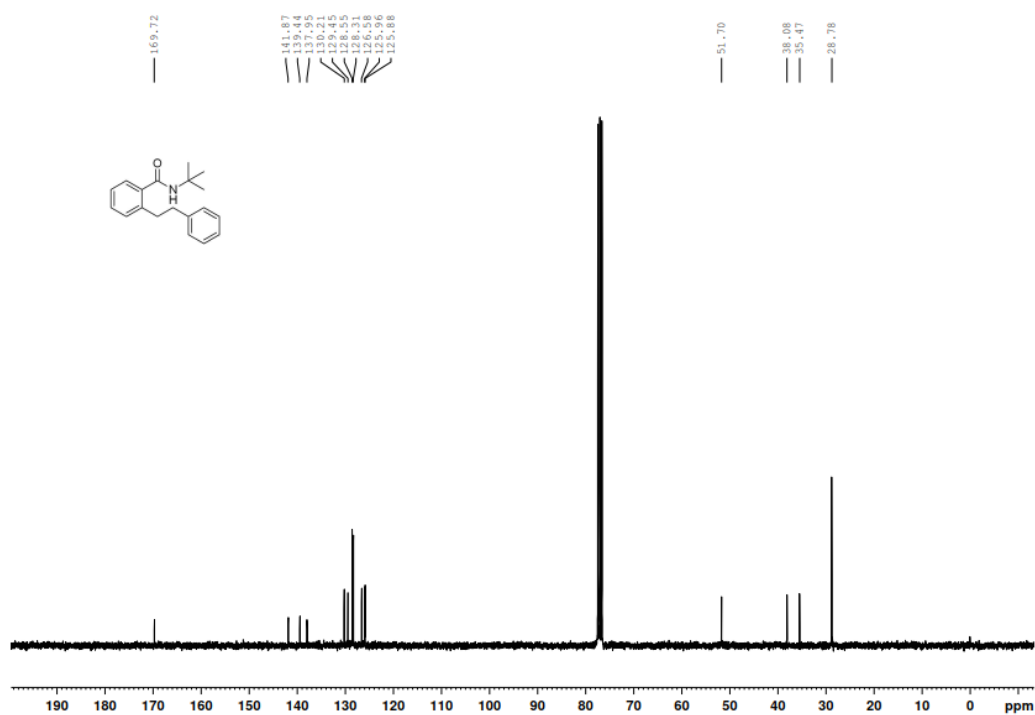

Supplementary Figure 182. <sup>13</sup>C NMR (75 MHz, CDCl<sub>3</sub>) spectra for compound 9j.

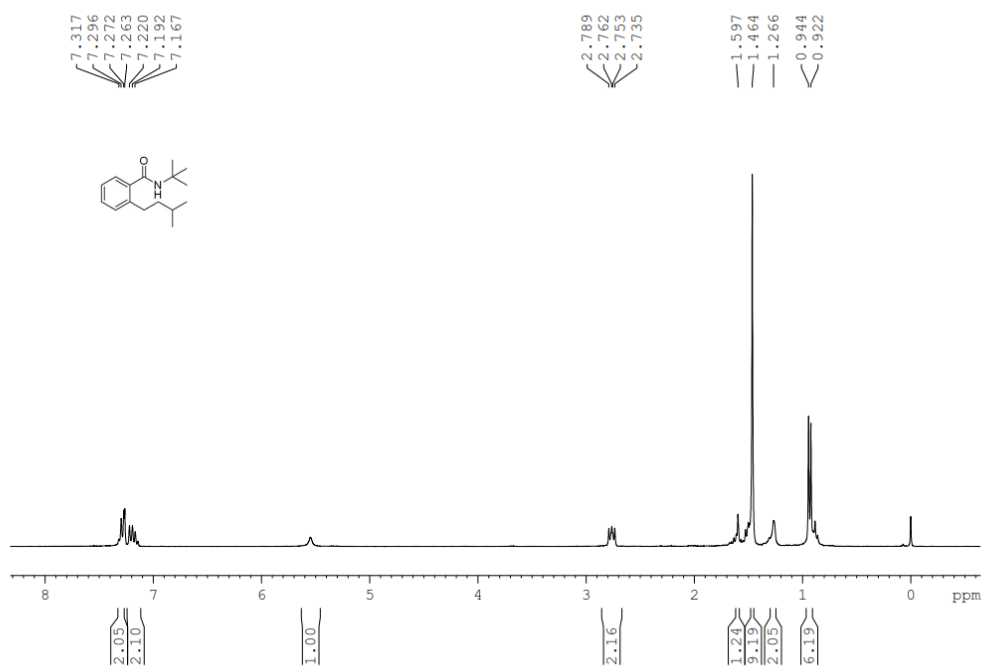

Supplementary Figure 183. <sup>1</sup>H NMR (300 MHz, CDCl<sub>3</sub>) spectra for compound 9k.

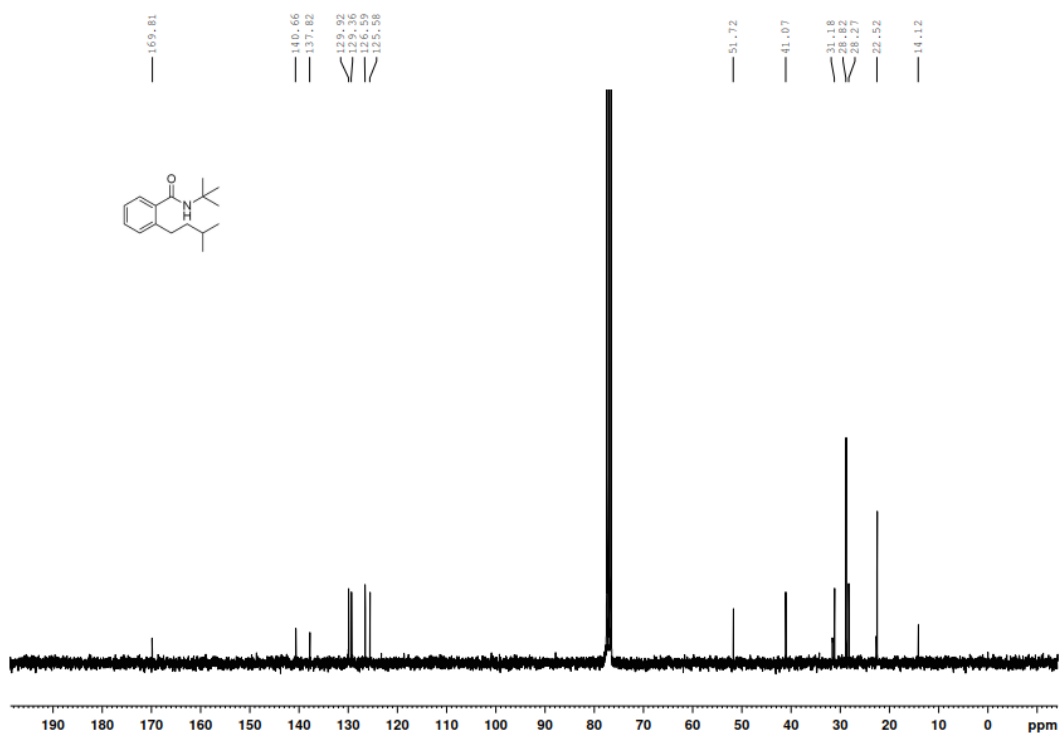

Supplementary Figure 184. <sup>13</sup>C NMR (75 MHz, CDCl<sub>3</sub>) spectra for compound 9k.

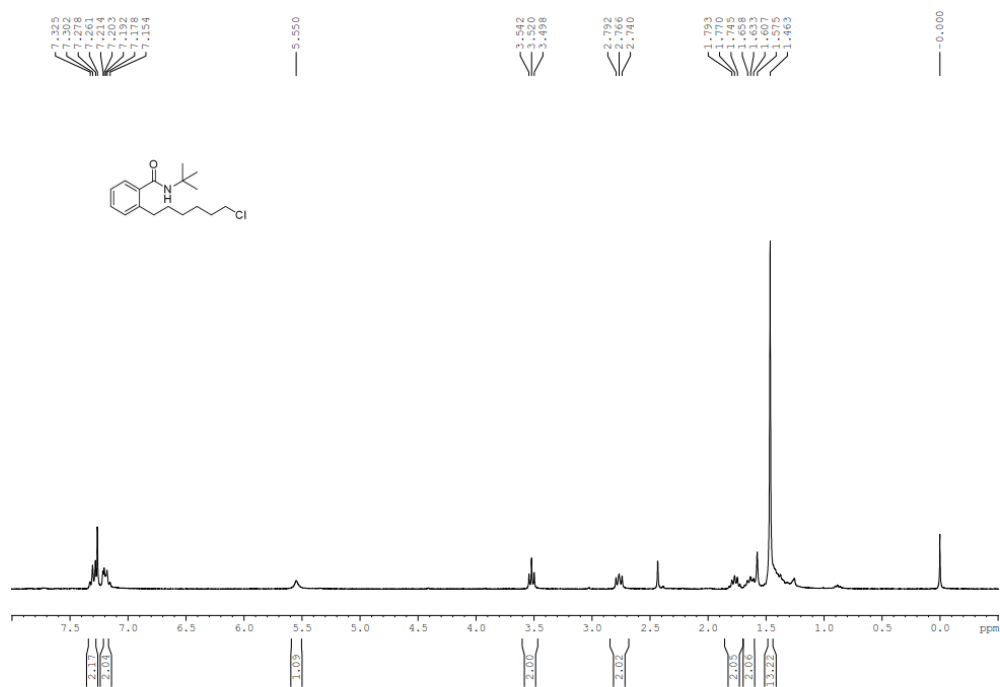

Supplementary Figure 185. <sup>1</sup>H NMR (300 MHz, CDCl<sub>3</sub>) spectra for compound 9l.

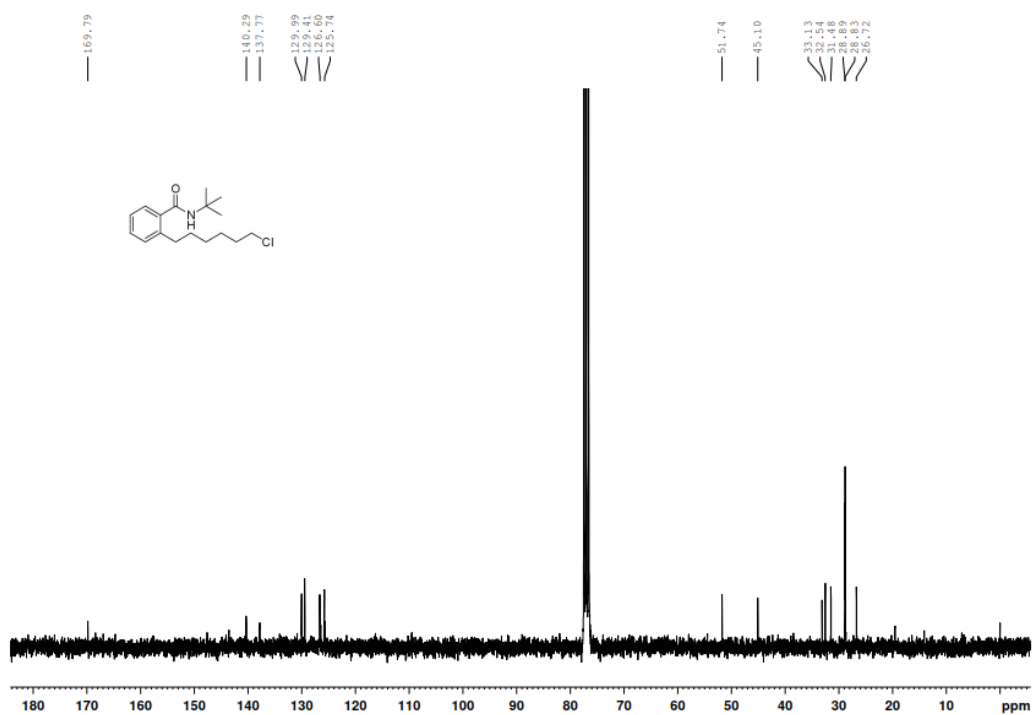

Supplementary Figure 186. <sup>13</sup>C NMR (75 MHz, CDCl<sub>3</sub>) spectra for compound 9l.

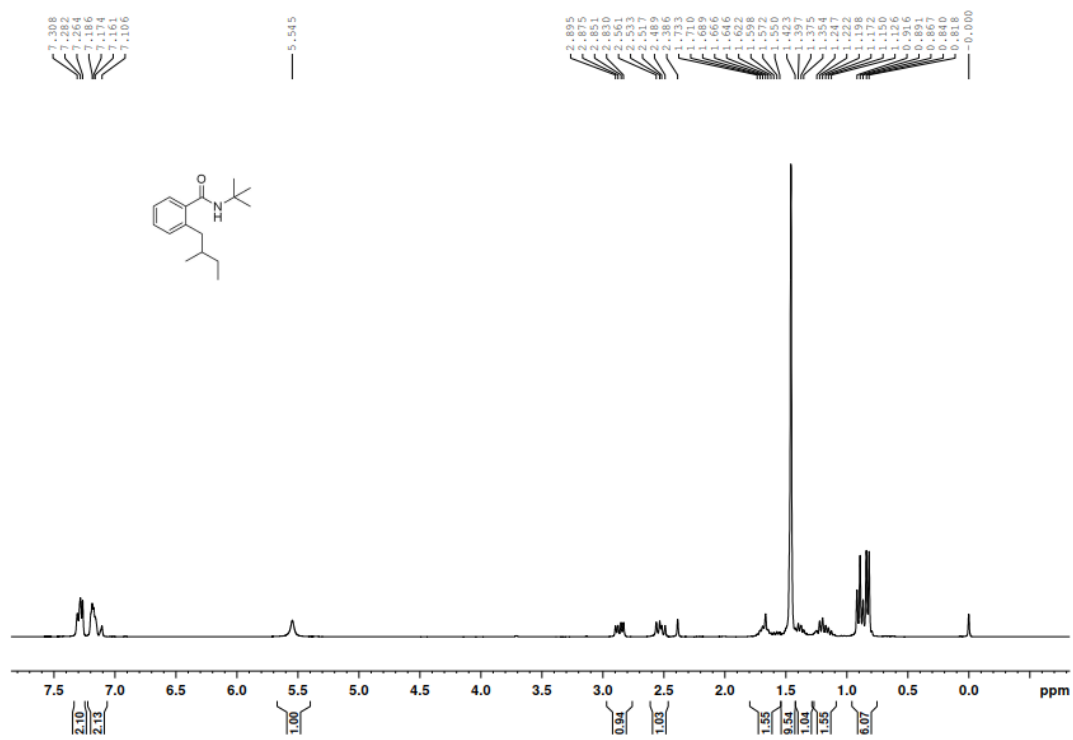

Supplementary Figure 187. <sup>1</sup>H NMR (300 MHz, CDCl<sub>3</sub>) spectra for compound 10a.



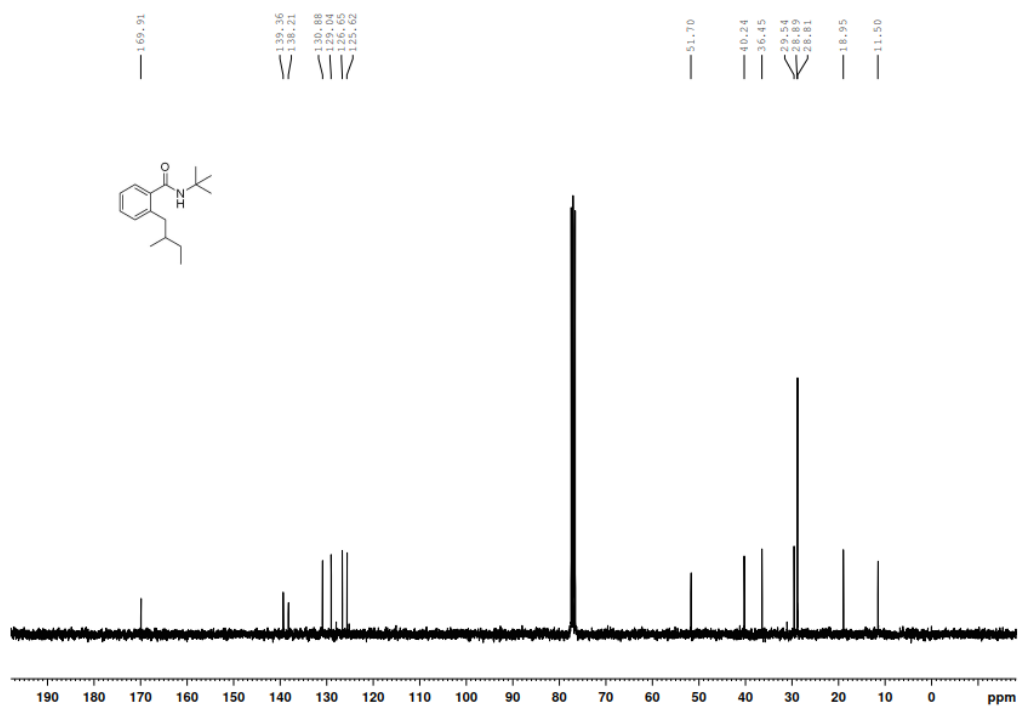

Supplementary Figure 188. <sup>13</sup>C NMR (75 MHz, CDCl<sub>3</sub>) spectra for compound 10a.

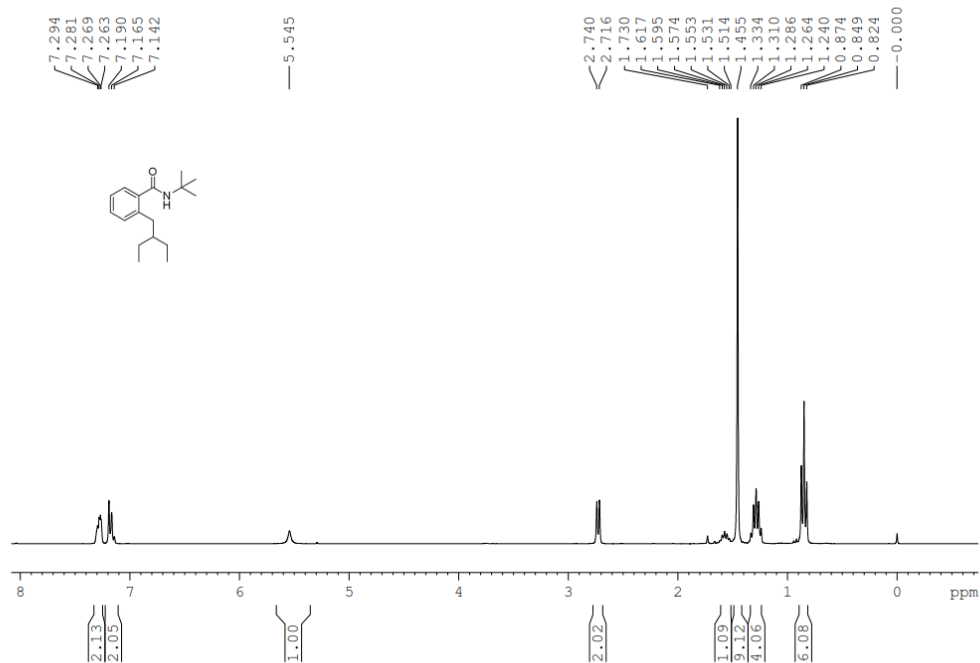

Supplementary Figure 189. <sup>1</sup>H NMR (300 MHz, CDCl<sub>3</sub>) spectra for compound 10b.

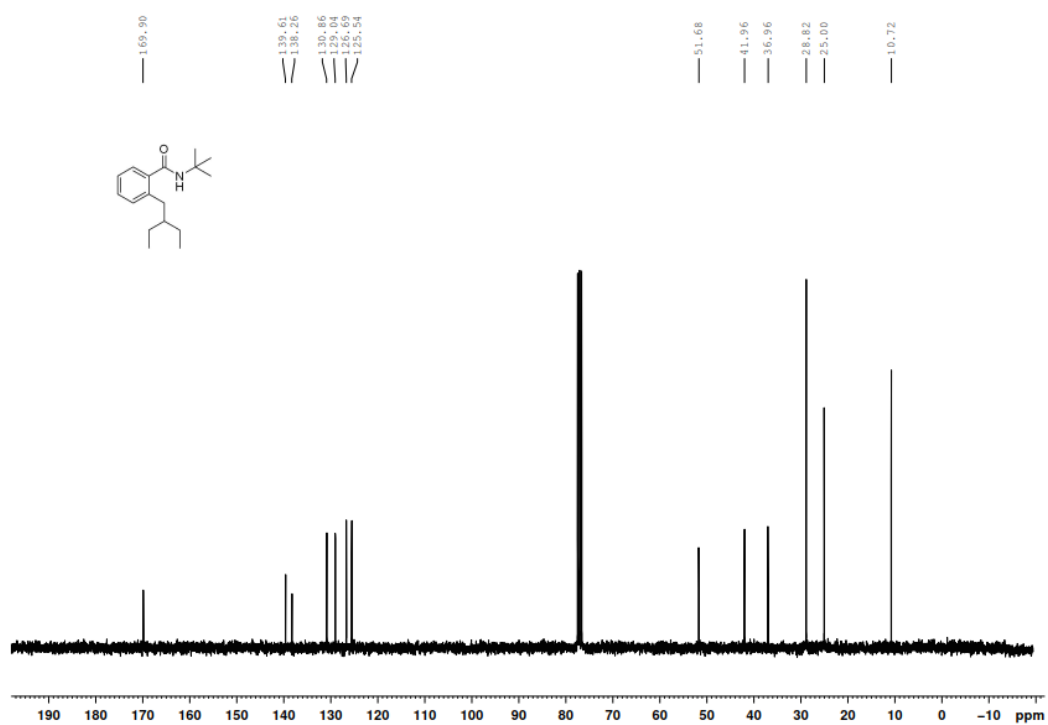

Supplementary Figure 190. <sup>13</sup>C NMR (75 MHz, CDCl<sub>3</sub>) spectra for compound 10b.

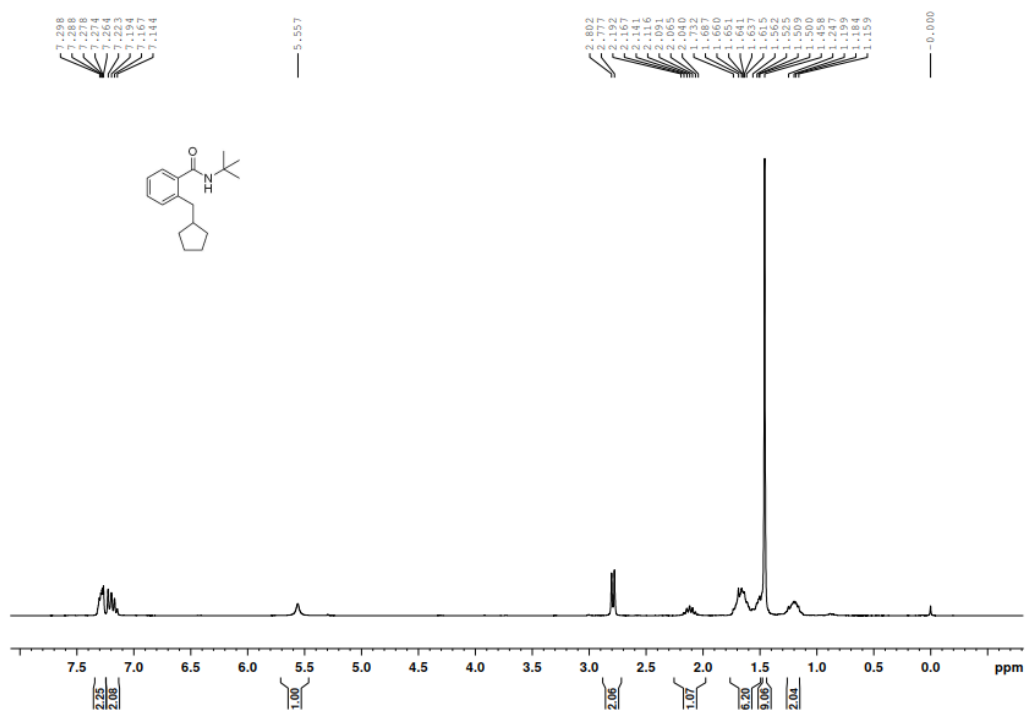

Supplementary Figure 191. <sup>1</sup>H NMR (300 MHz, CDCl<sub>3</sub>) spectra for compound 10c.

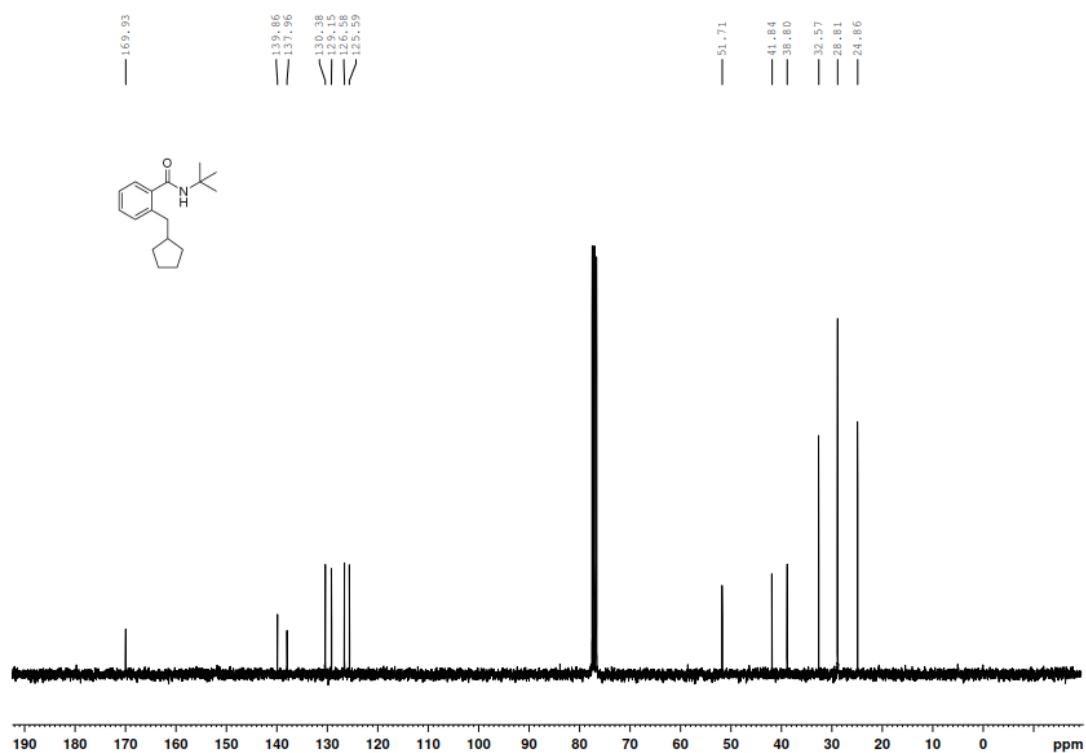

Supplementary Figure 192. <sup>13</sup>C NMR (75 MHz, CDCl<sub>3</sub>) spectra for compound 10c.

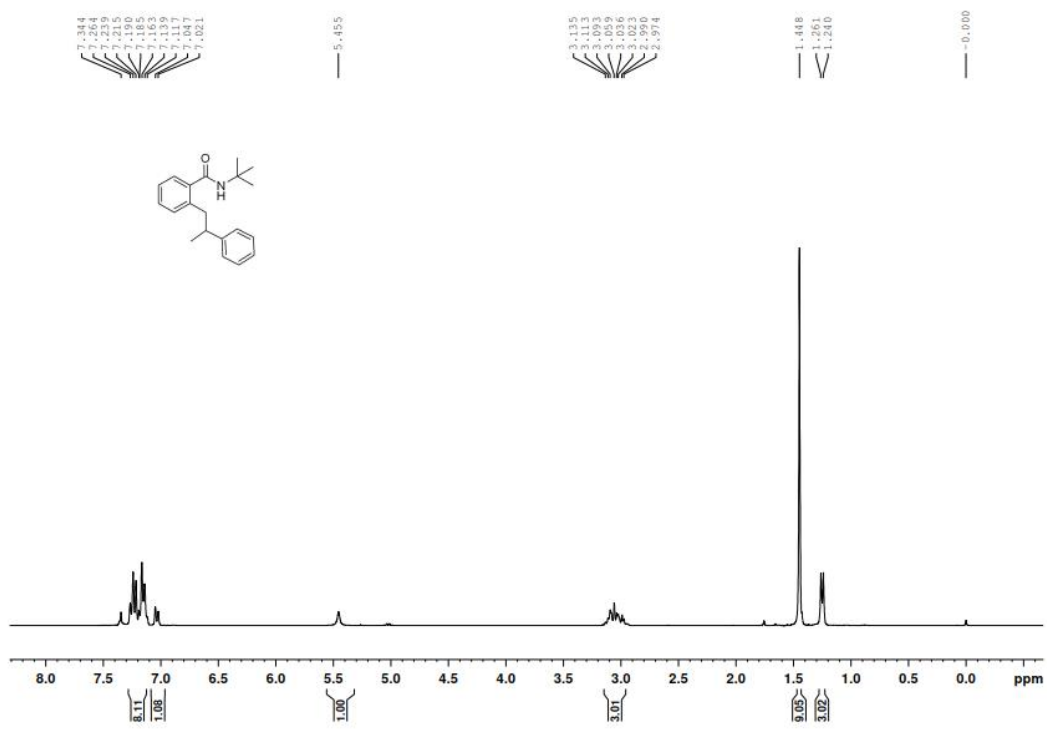

Supplementary Figure 193. <sup>1</sup>H NMR (300 MHz, CDCl<sub>3</sub>) spectra for compound 10d.

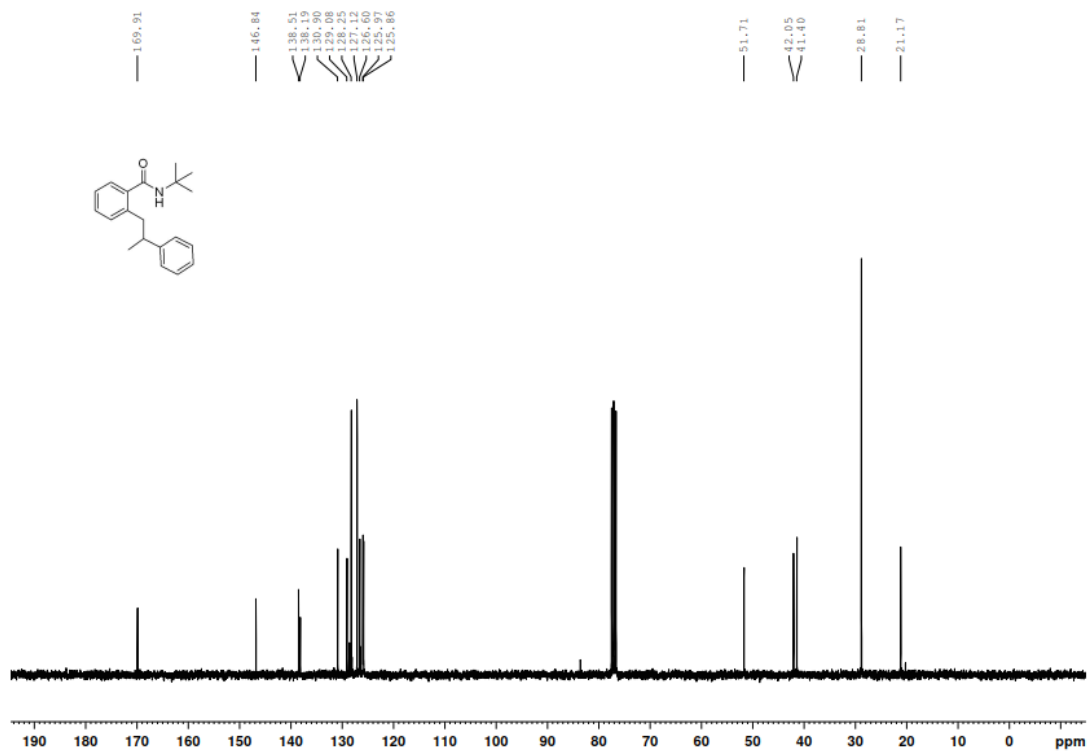

Supplementary Figure 194. <sup>13</sup>C NMR (75 MHz, CDCl<sub>3</sub>) spectra for compound 10d.

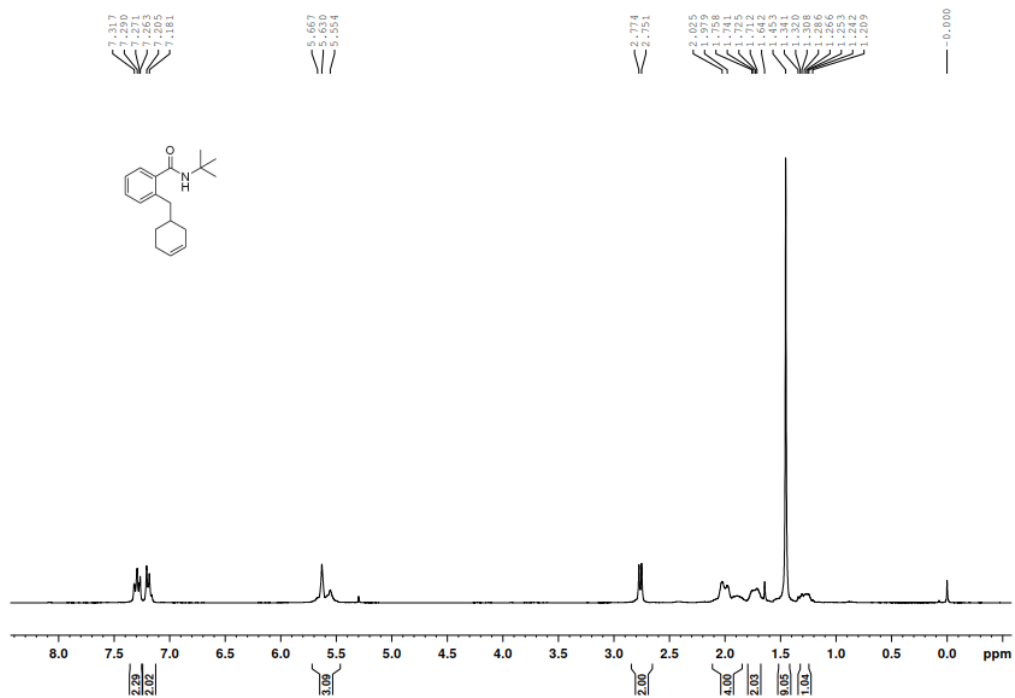

Supplementary Figure 195. <sup>1</sup>H NMR (300 MHz, CDCl<sub>3</sub>) spectra for compound 10e.

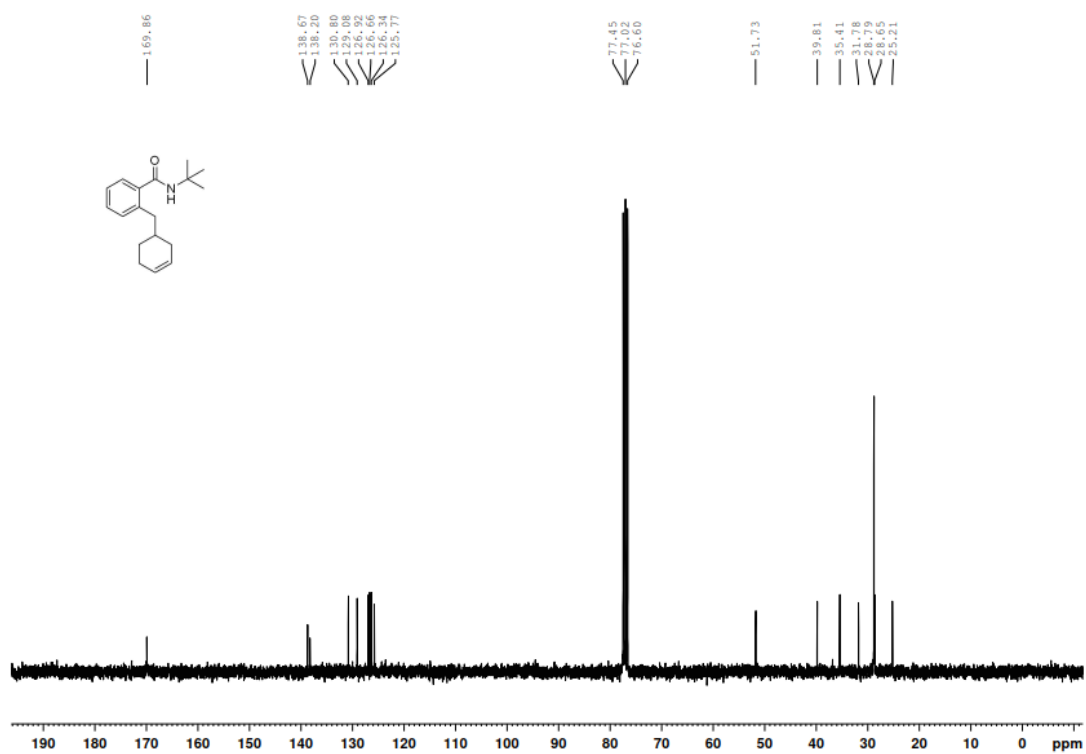

Supplementary Figure 196. <sup>13</sup>C NMR (75 MHz, CDCl<sub>3</sub>) spectra for compound 10e.

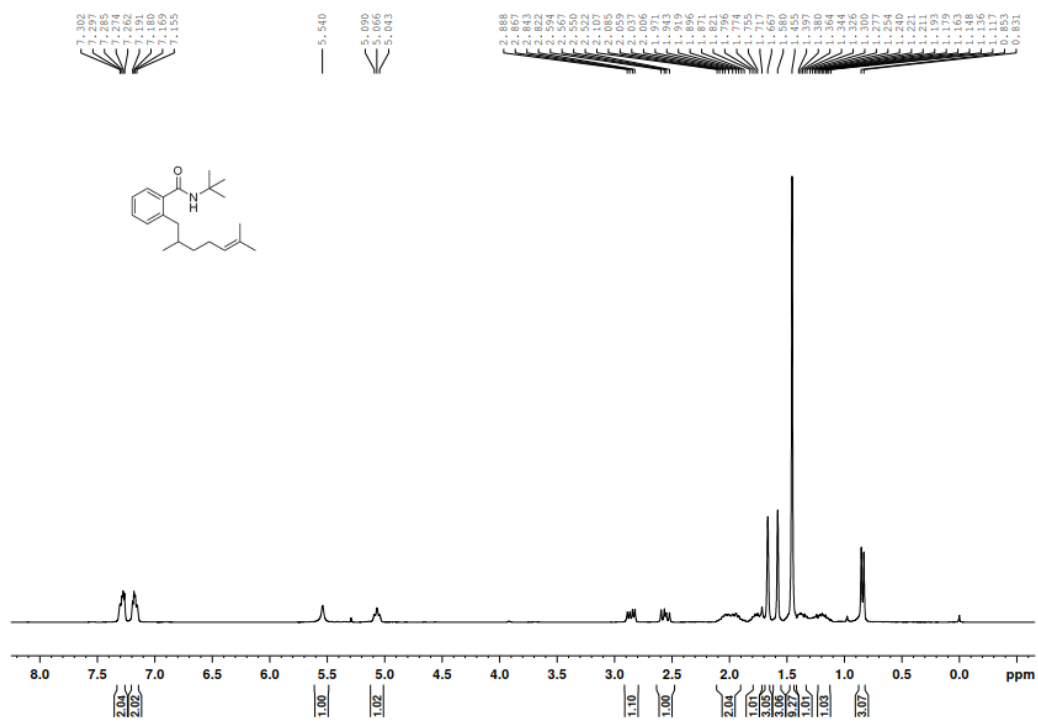

Supplementary Figure 197. <sup>1</sup>H NMR (300 MHz, CDCl<sub>3</sub>) spectra for compound 10f.

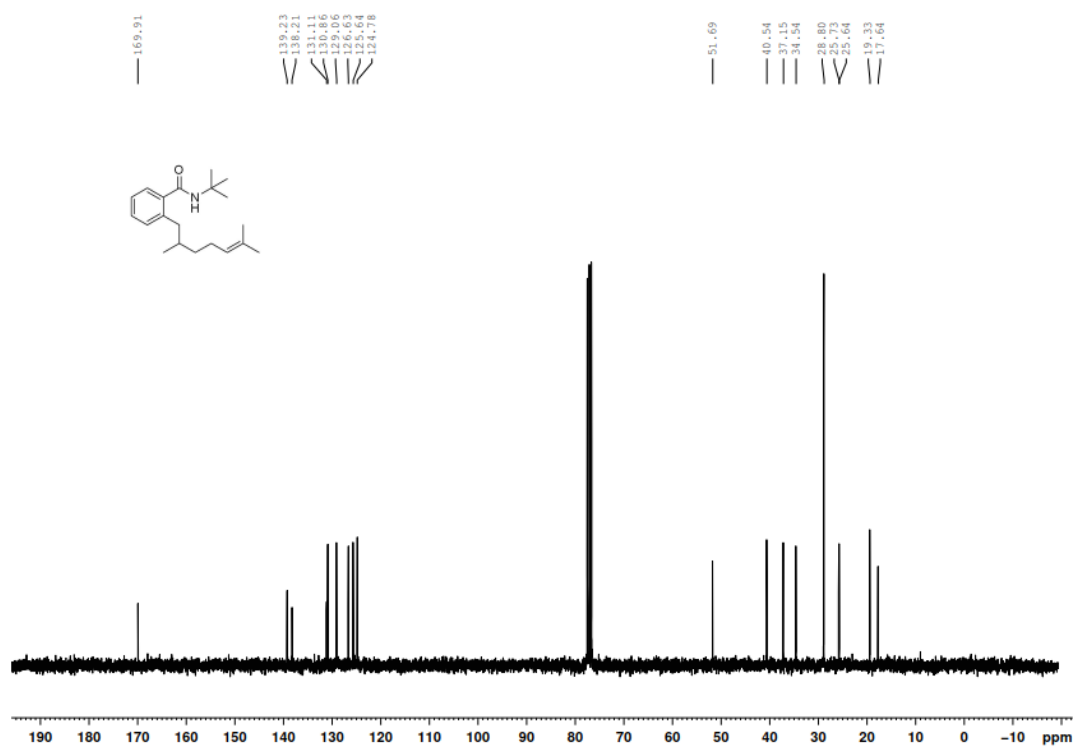

Supplementary Figure 198. <sup>13</sup>C NMR (75 MHz, CDCl<sub>3</sub>) spectra for compound 10f.

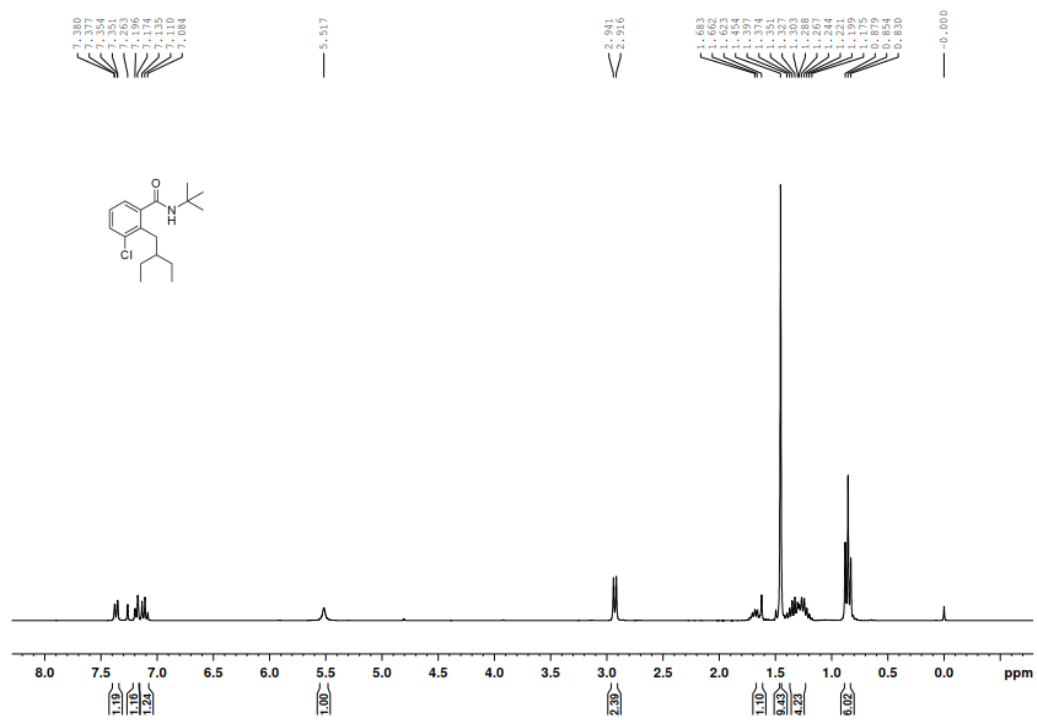

Supplementary Figure 199. <sup>1</sup>H NMR (300 MHz, CDCl<sub>3</sub>) spectra for compound 10g.

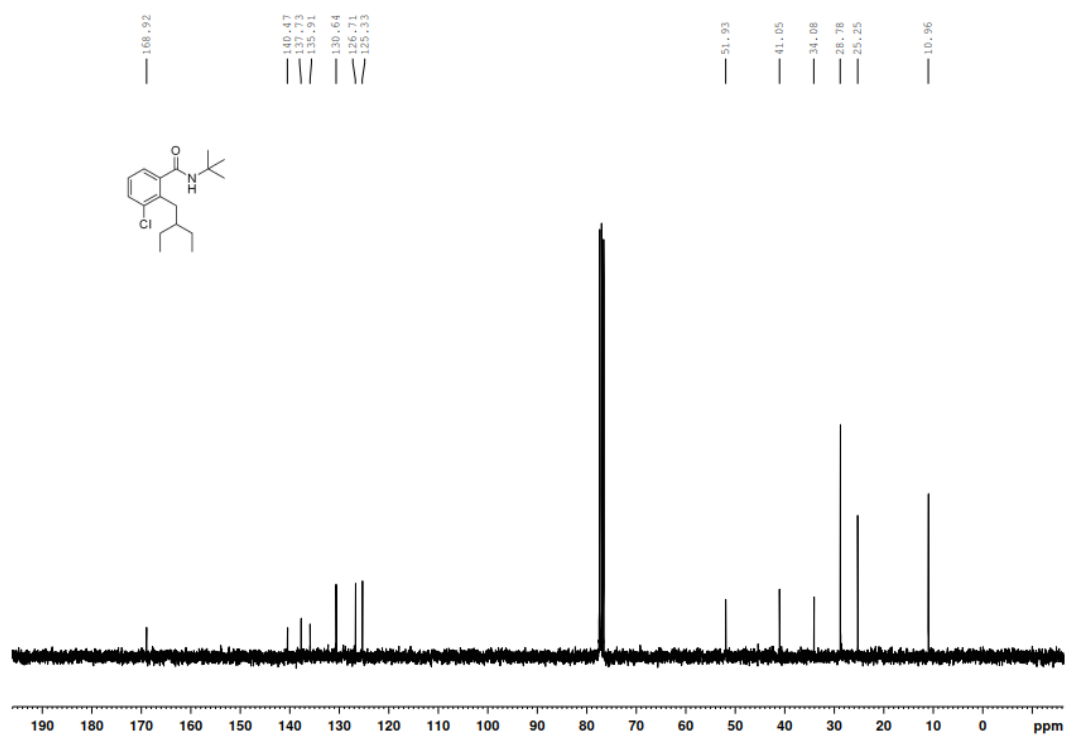

Supplementary Figure 200. <sup>13</sup>C NMR (75 MHz, CDCl<sub>3</sub>) spectra for compound 10g.

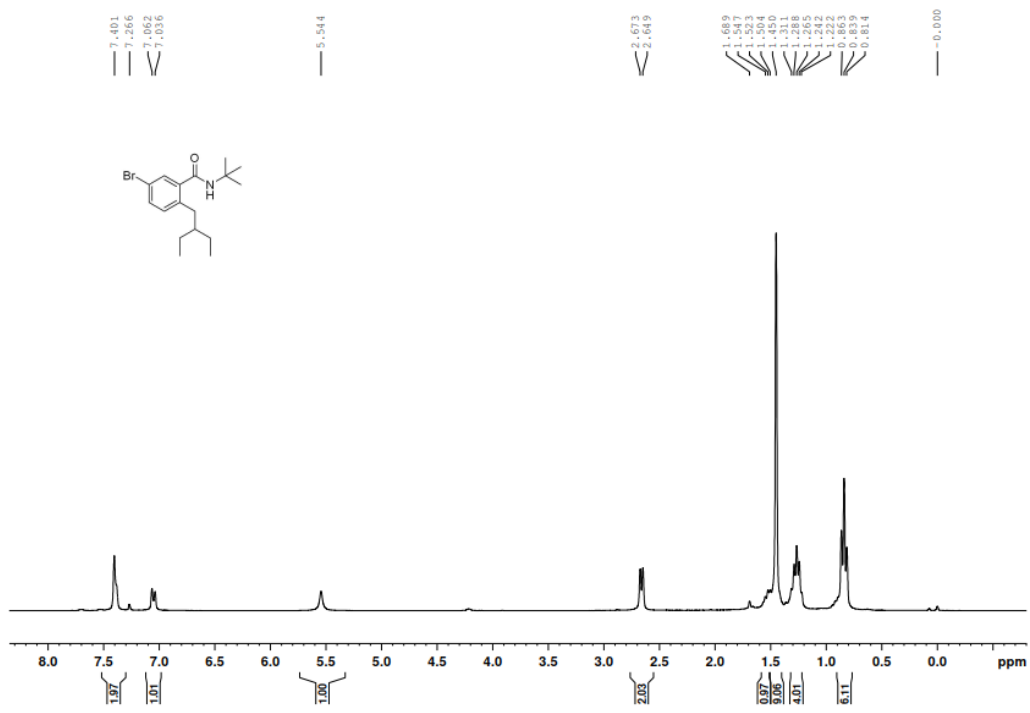

Supplementary Figure 201. <sup>1</sup>H NMR (300 MHz, CDCl<sub>3</sub>) spectra for compound 10h.

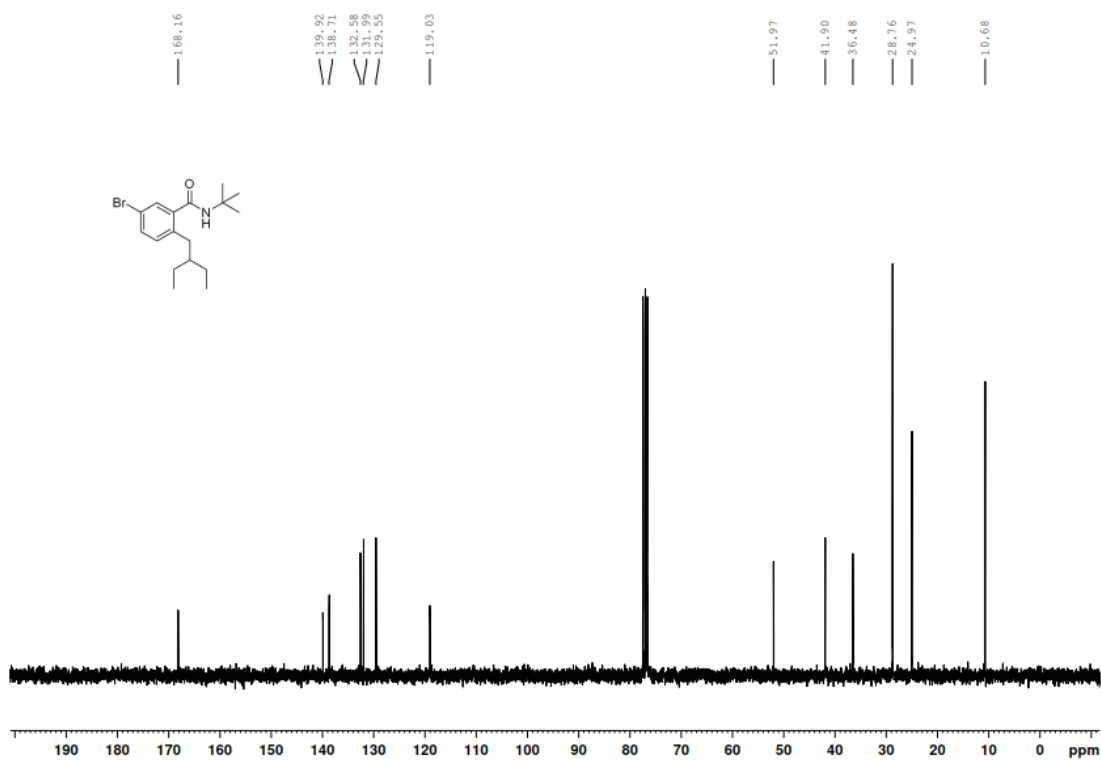

Supplementary Figure 202. <sup>13</sup>C NMR (75 MHz, CDCl<sub>3</sub>) spectra for compound 10h.

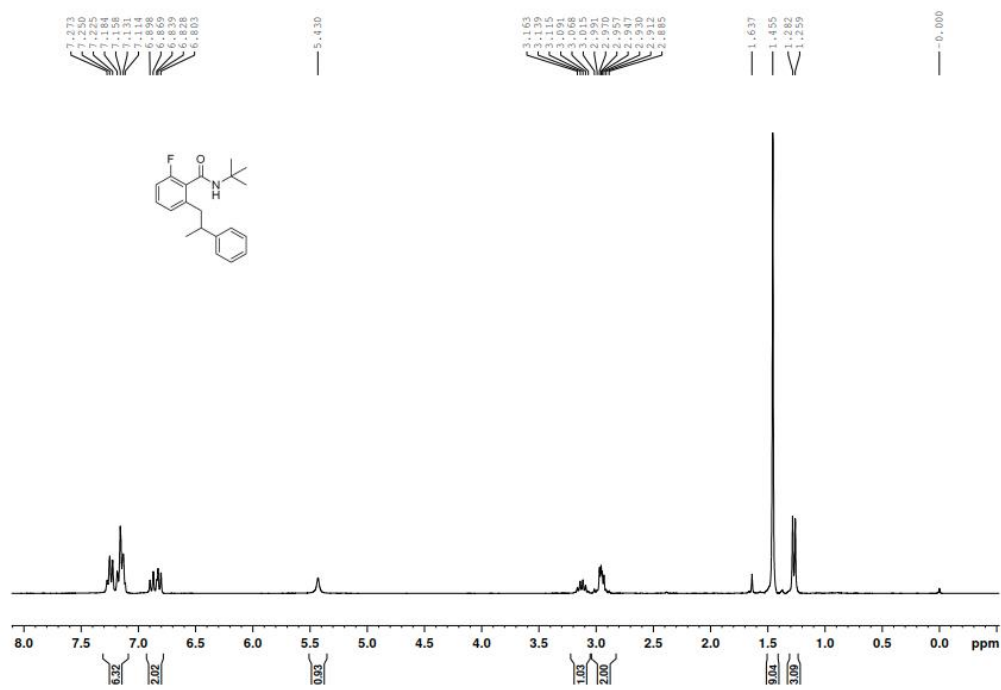

Supplementary Figure 203. <sup>1</sup>H NMR (300 MHz, CDCl<sub>3</sub>) spectra for compound 10i.



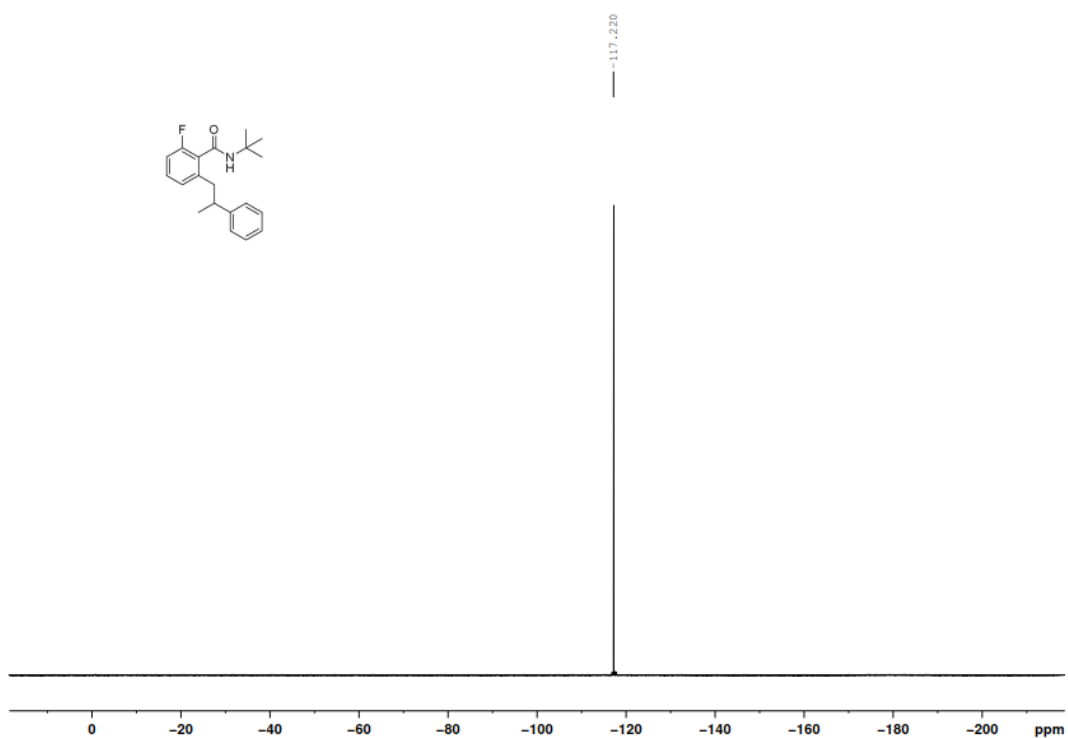

Supplementary Figure 204.  $^{19}\text{F}$  NMR (282 MHz,  $\text{CDCl}_3$ ) spectra for compound 10i.

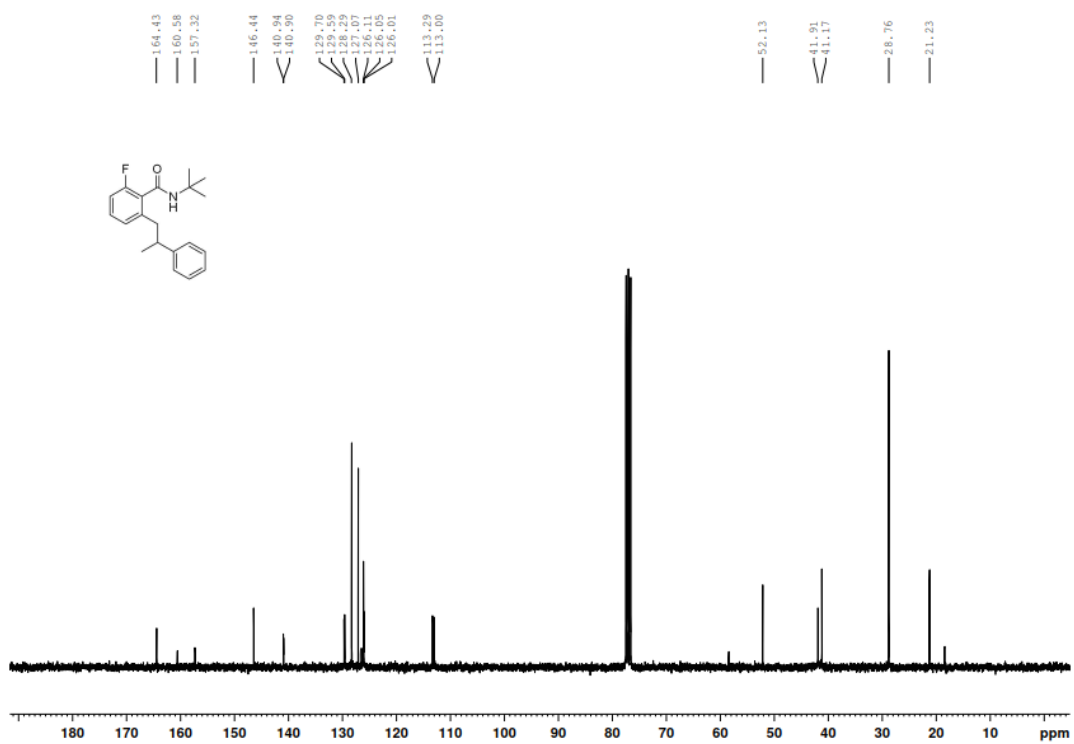

Supplementary Figure 205.  $^{13}\text{C}$  NMR (75 MHz,  $\text{CDCl}_3$ ) spectra for compound 10i.

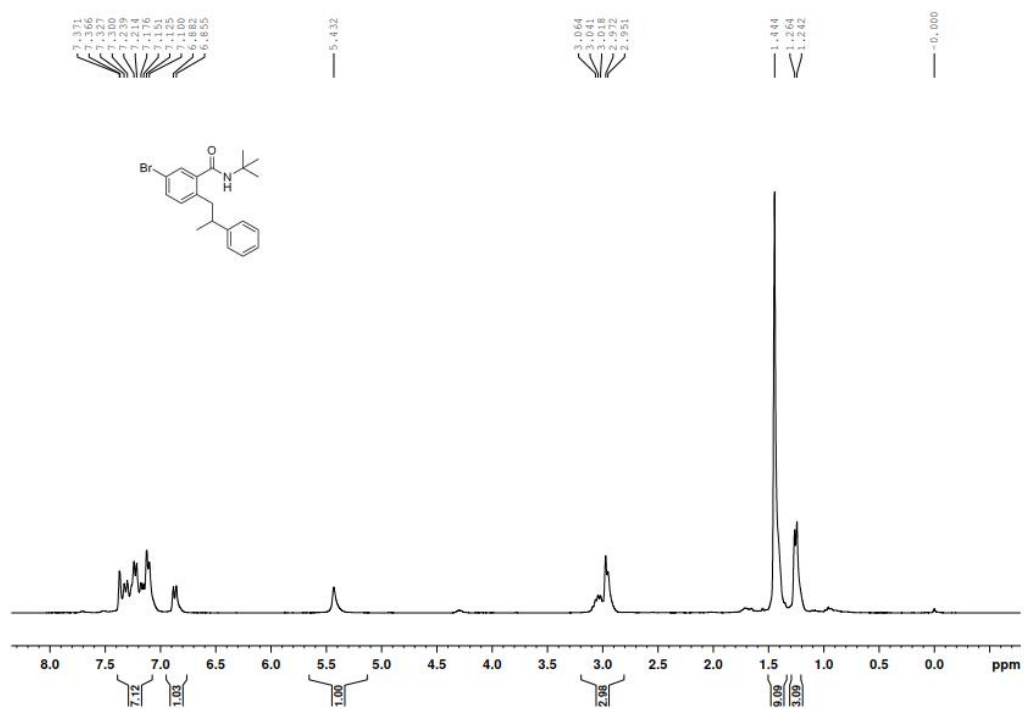

Supplementary Figure 206. <sup>1</sup>H NMR (300 MHz, CDCl<sub>3</sub>) spectra for compound 10j.

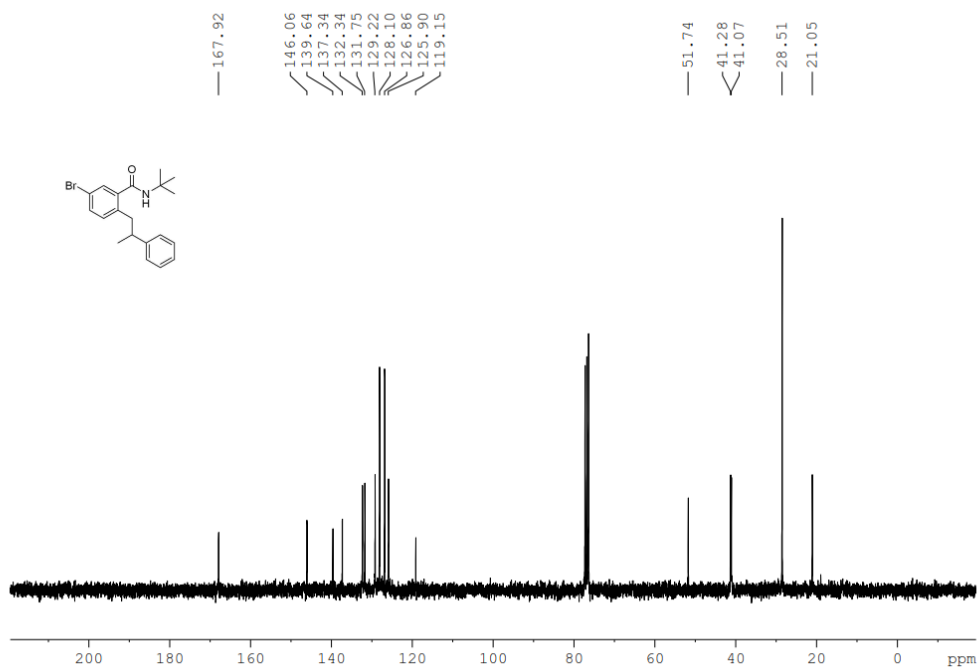

Supplementary Figure 207. <sup>13</sup>C NMR (75 MHz, CDCl<sub>3</sub>) spectra for compound 10j.

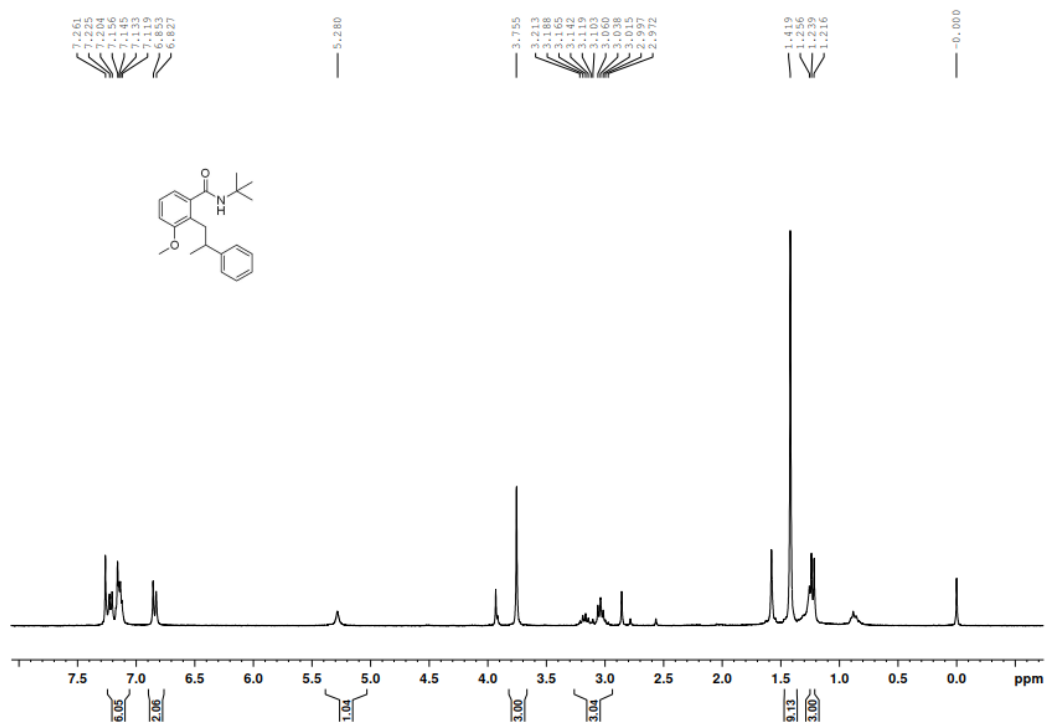

Supplementary Figure 208. <sup>1</sup>H NMR (300 MHz, CDCl<sub>3</sub>) spectra for compound 10k.

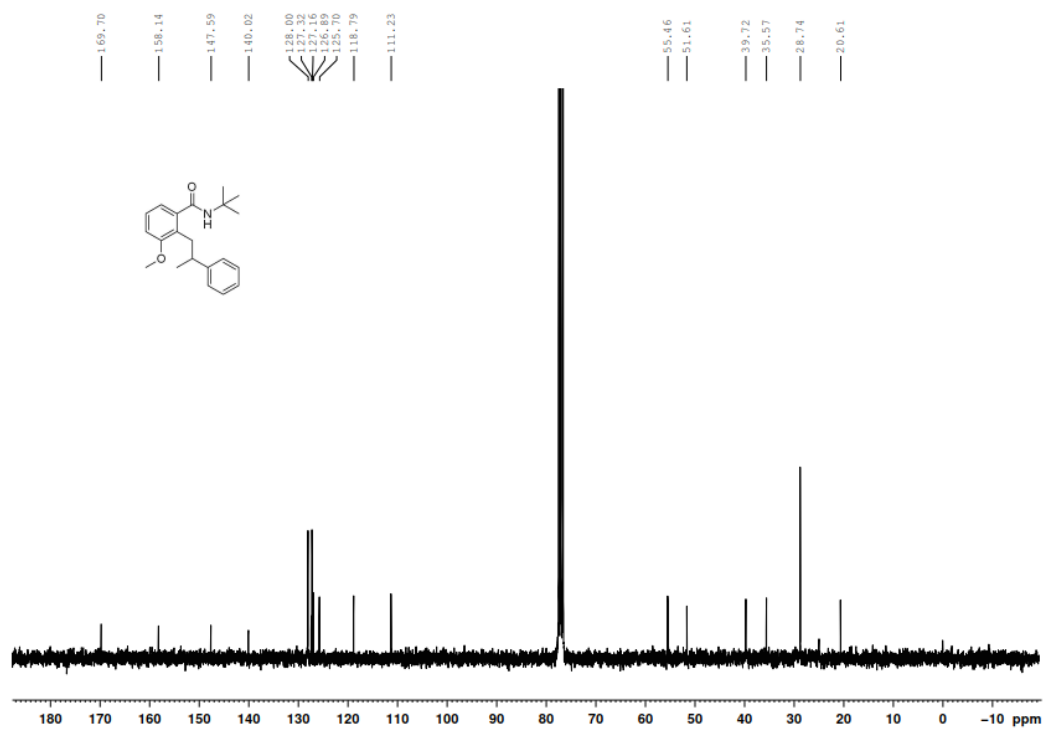

Supplementary Figure 209. <sup>13</sup>C NMR (75 MHz, CDCl<sub>3</sub>) spectra for compound 10k.

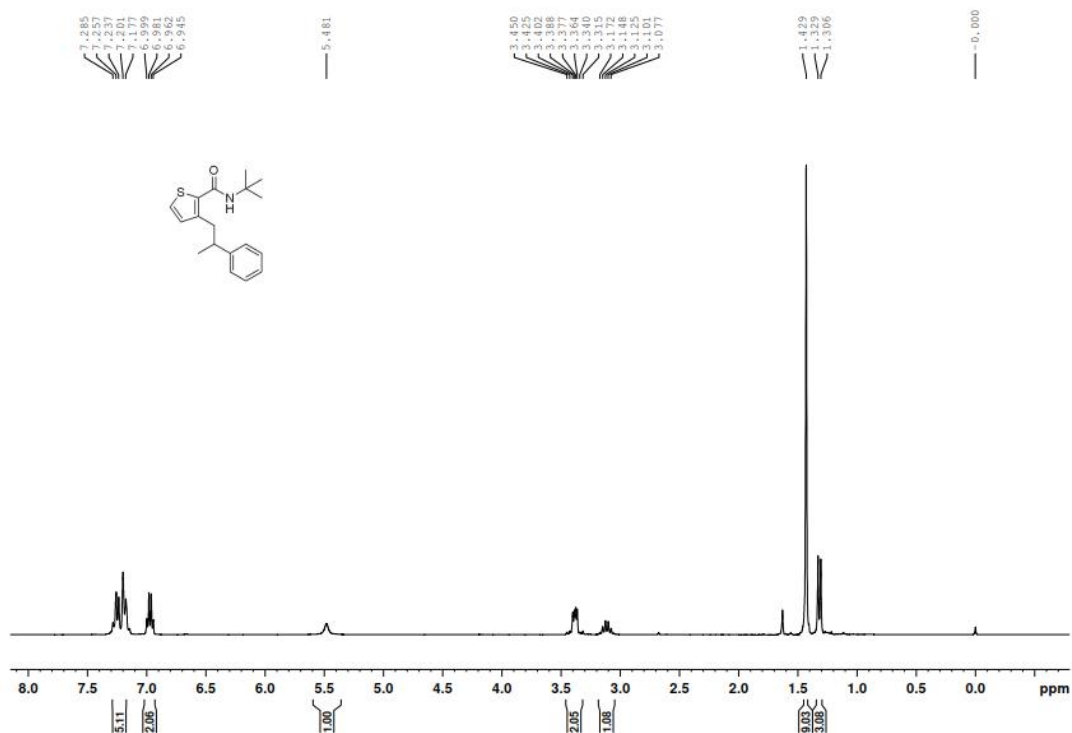

Supplementary Figure 210. <sup>1</sup>H NMR (300 MHz, CDCl<sub>3</sub>) spectra for compound 10l.

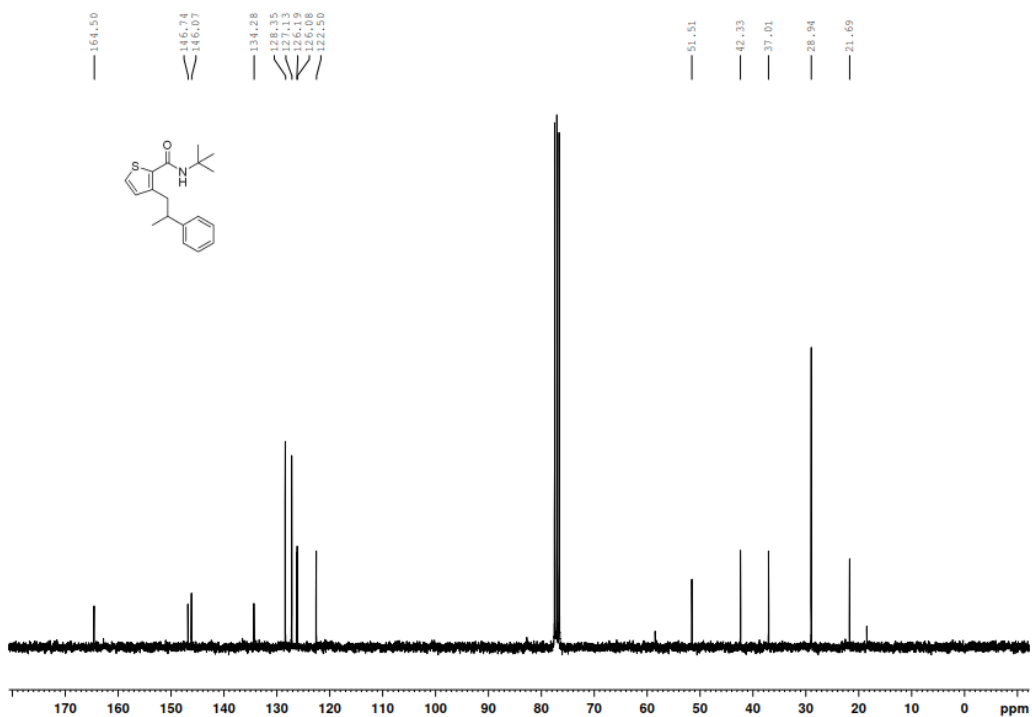

Supplementary Figure 211. <sup>13</sup>C NMR (75 MHz, CDCl<sub>3</sub>) spectra for compound 10l.

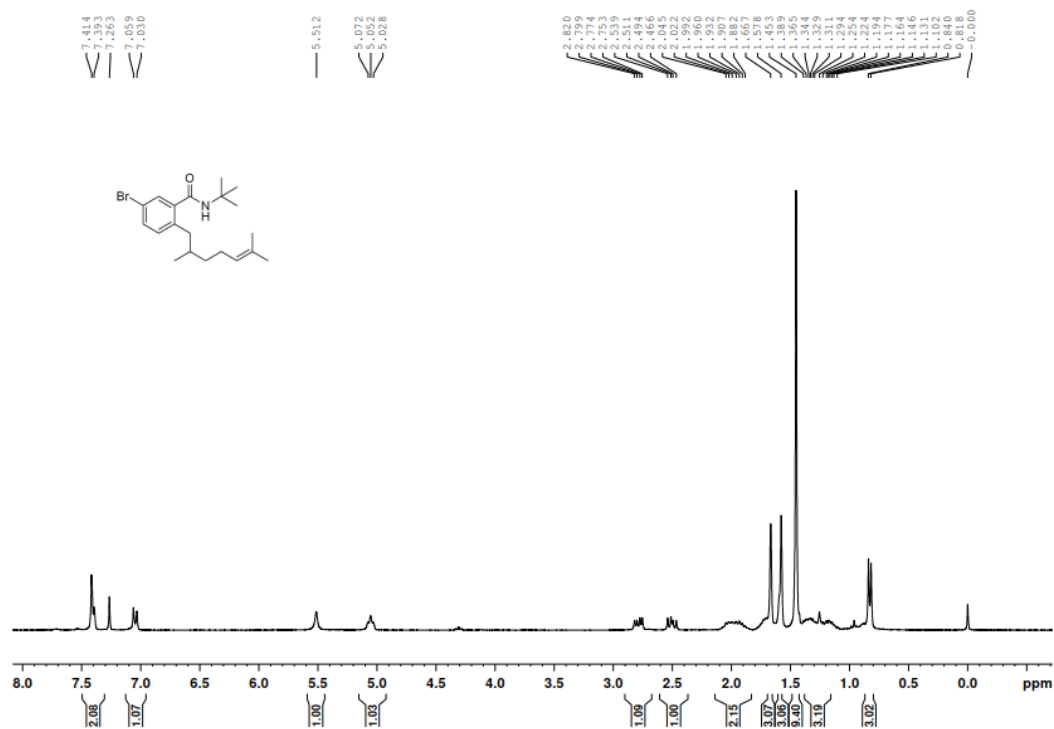

Supplementary Figure 212. <sup>1</sup>H NMR (300 MHz, CDCl<sub>3</sub>) spectra for compound 10m.

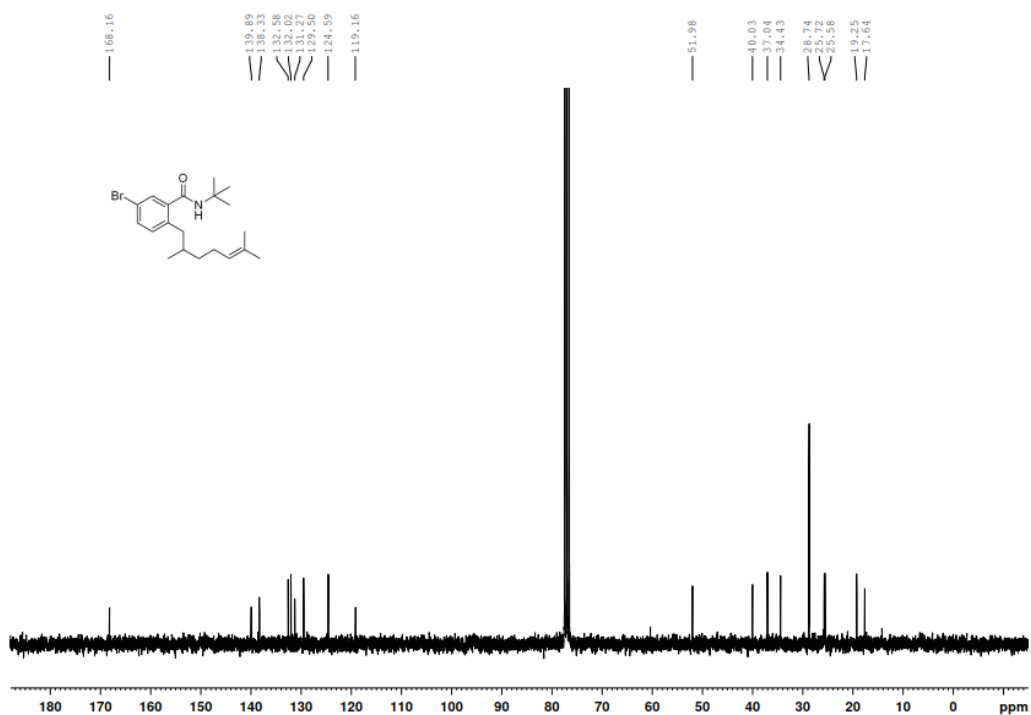

Supplementary Figure 213. <sup>13</sup>C NMR (75 MHz, CDCl<sub>3</sub>) spectra for compound 10m.

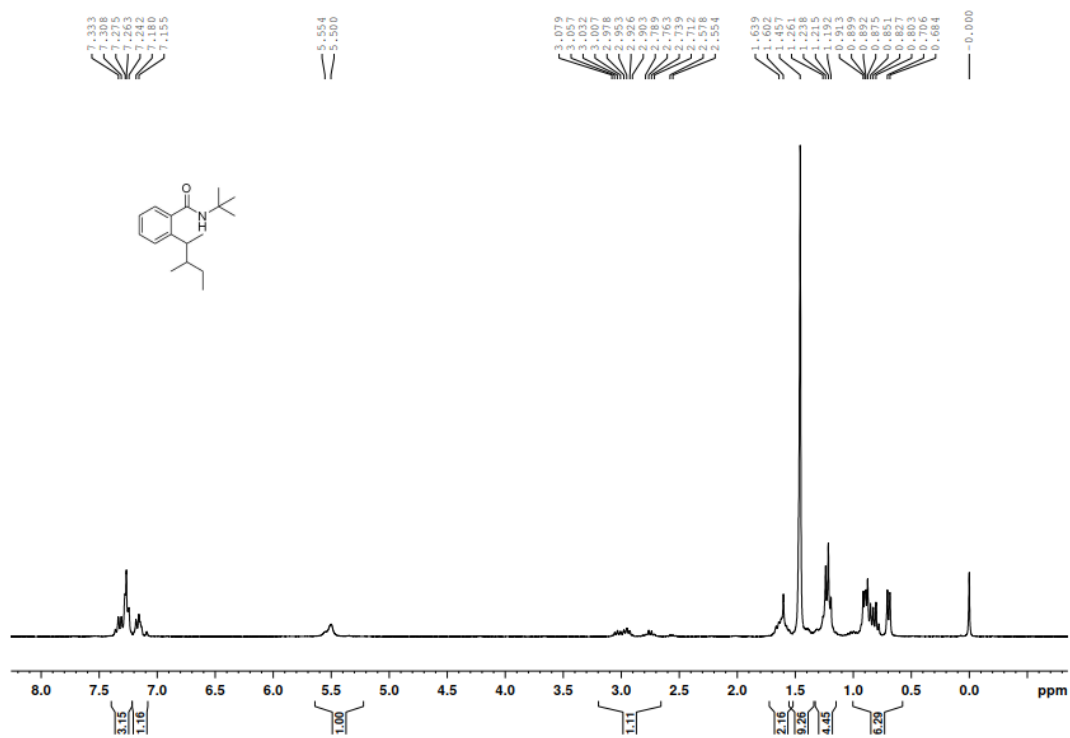

Supplementary Figure 214. <sup>1</sup>H NMR (300 MHz, CDCl<sub>3</sub>) spectra for compound 10n.

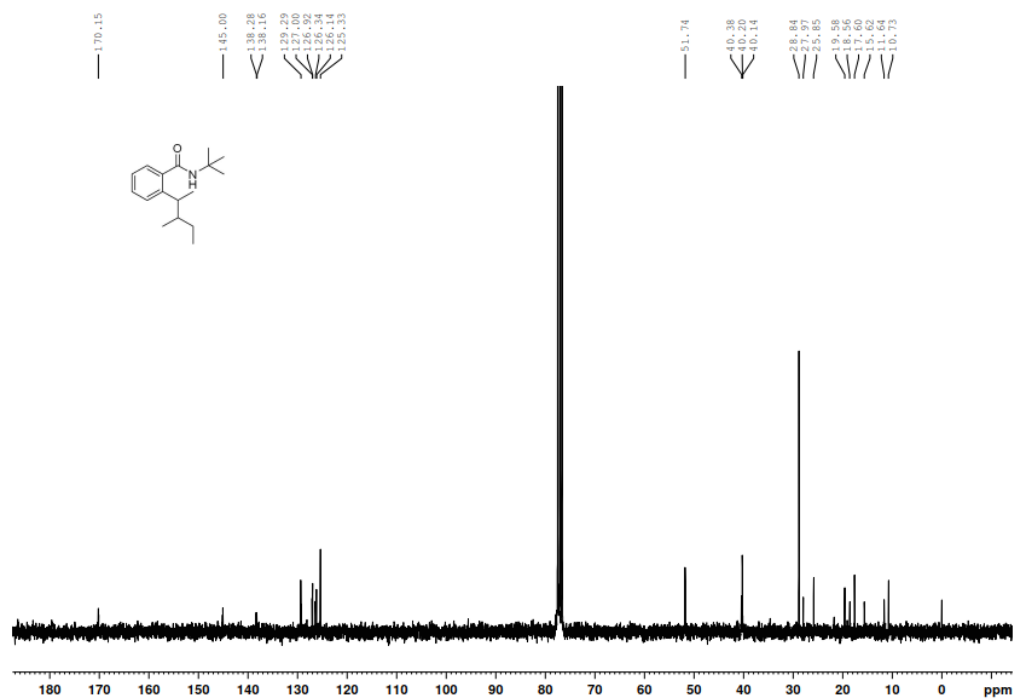

Supplementary Figure 215. <sup>13</sup>C NMR (75 MHz, CDCl<sub>3</sub>) spectra for compound 10n.

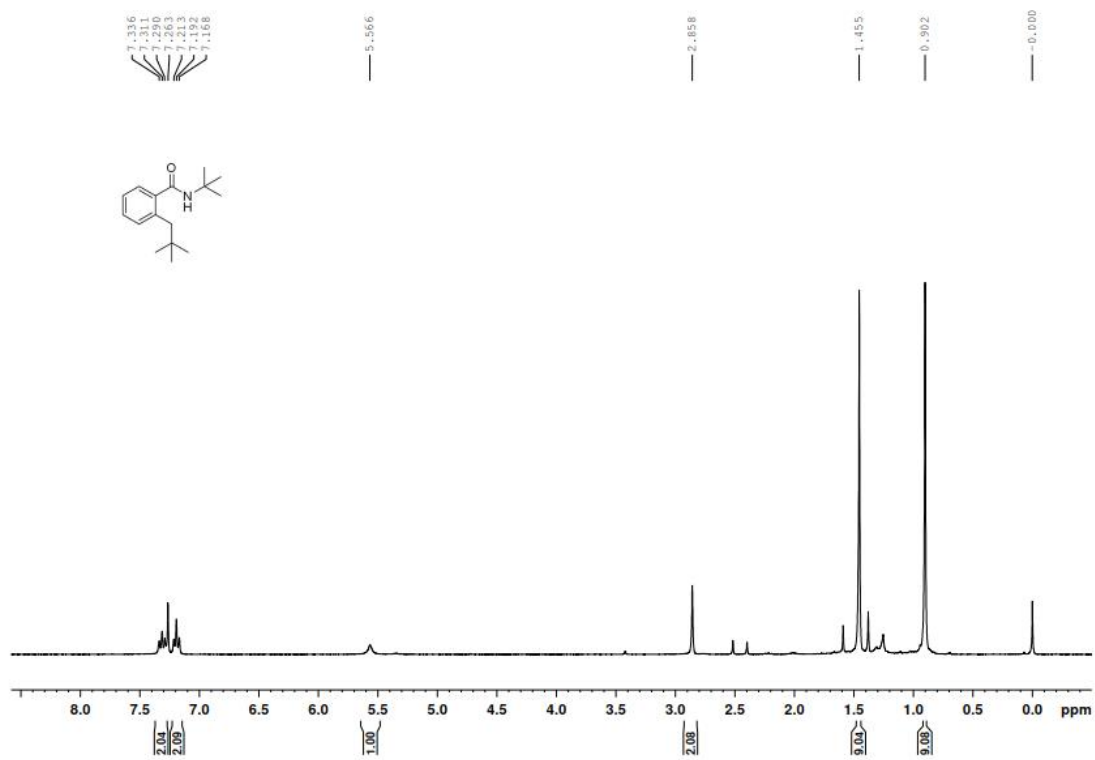

Supplementary Figure 216. <sup>1</sup>H NMR (300 MHz, CDCl<sub>3</sub>) spectra for compound 11a.

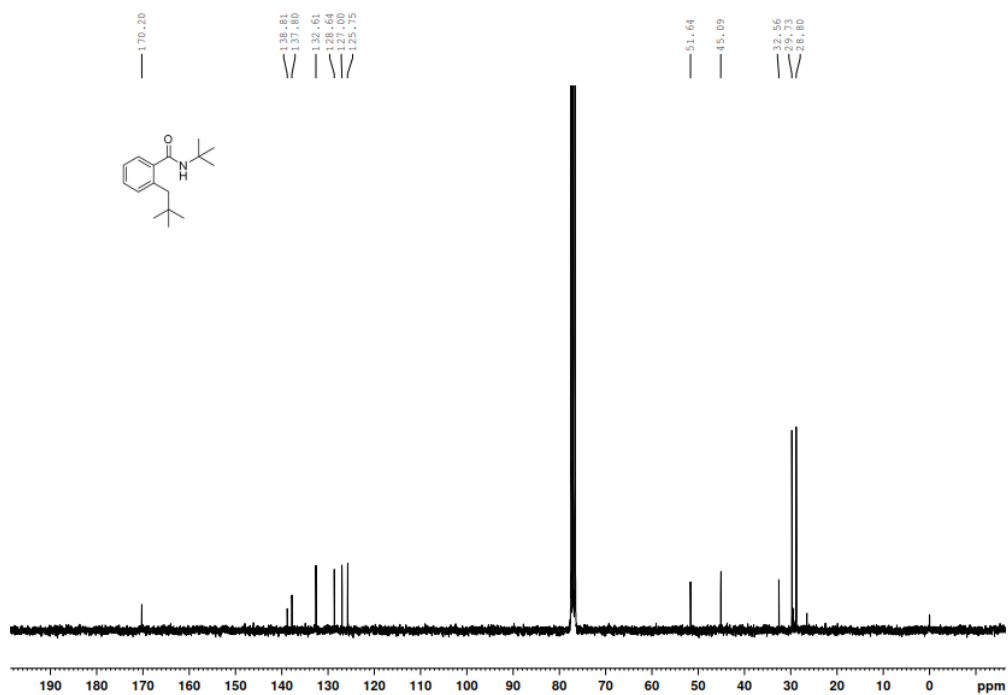

Supplementary Figure 217. <sup>13</sup>C NMR (75 MHz, CDCl<sub>3</sub>) spectra for compound 11a.

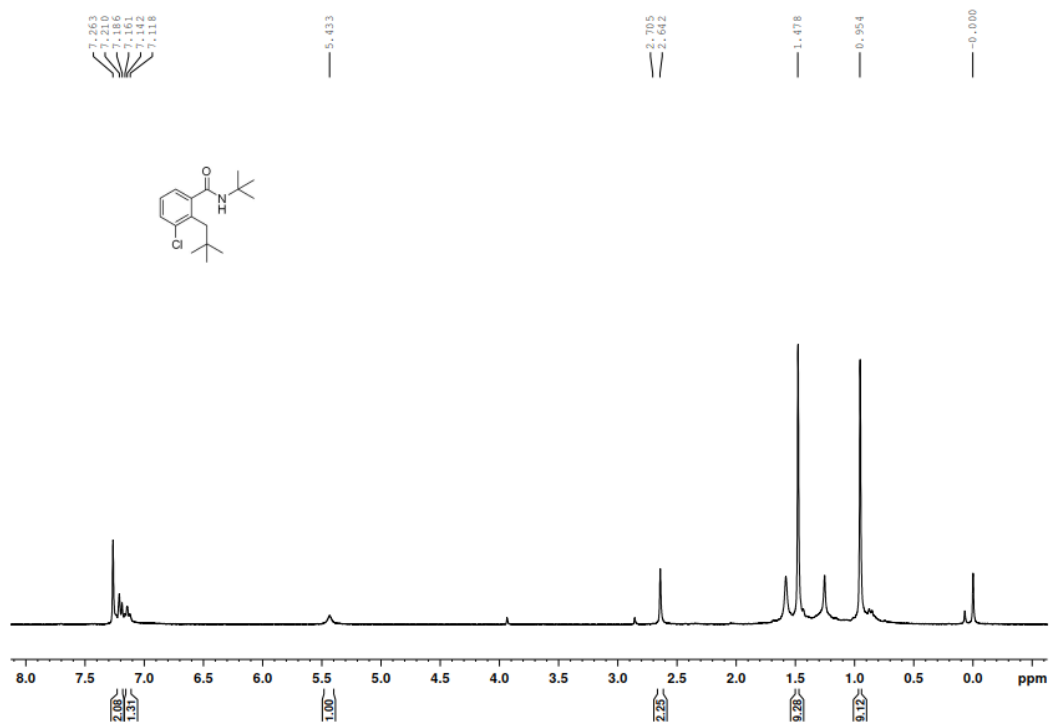

Supplementary Figure 218. <sup>1</sup>H NMR (300 MHz, CDCl<sub>3</sub>) spectra for compound 11b.

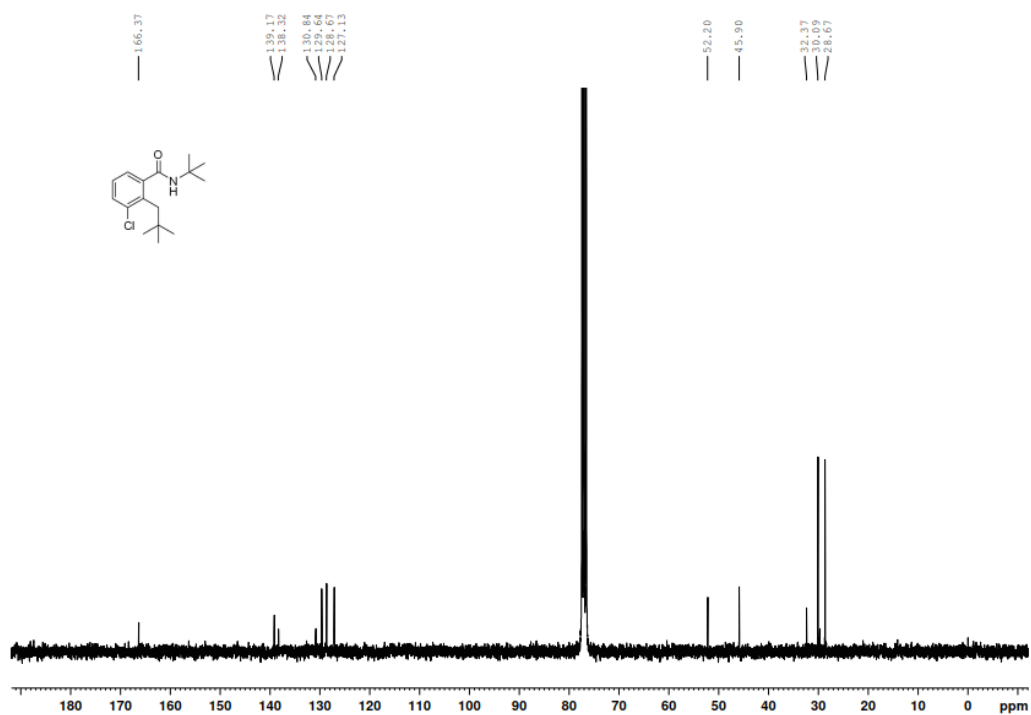

Supplementary Figure 219. <sup>13</sup>C NMR (75 MHz, CDCl<sub>3</sub>) spectra for compound 11b.



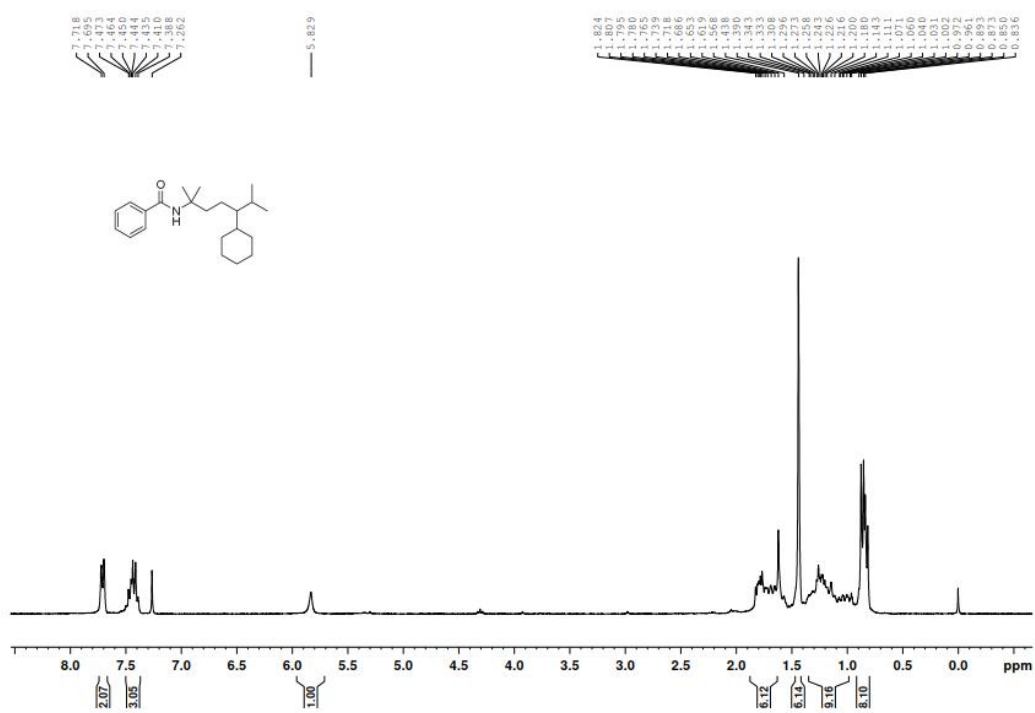

Supplementary Figure 220. <sup>1</sup>H NMR (300 MHz, CDCl<sub>3</sub>) spectra for compound 12a.

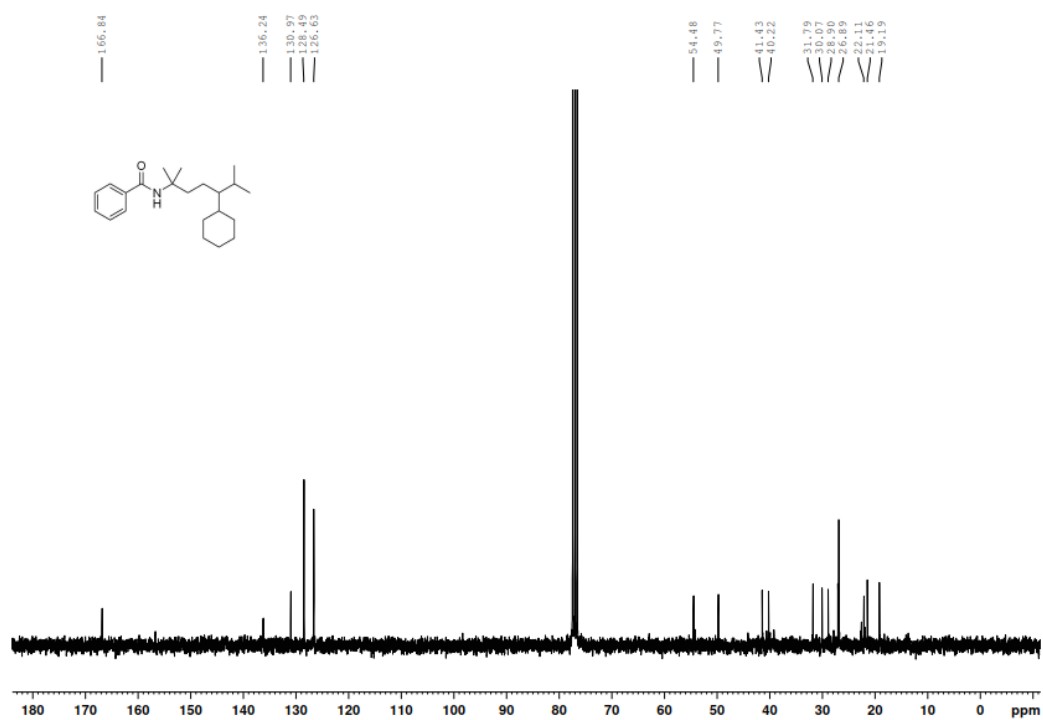

Supplementary Figure 221. <sup>13</sup>C NMR (75 MHz, CDCl<sub>3</sub>) spectra for compound 12a.

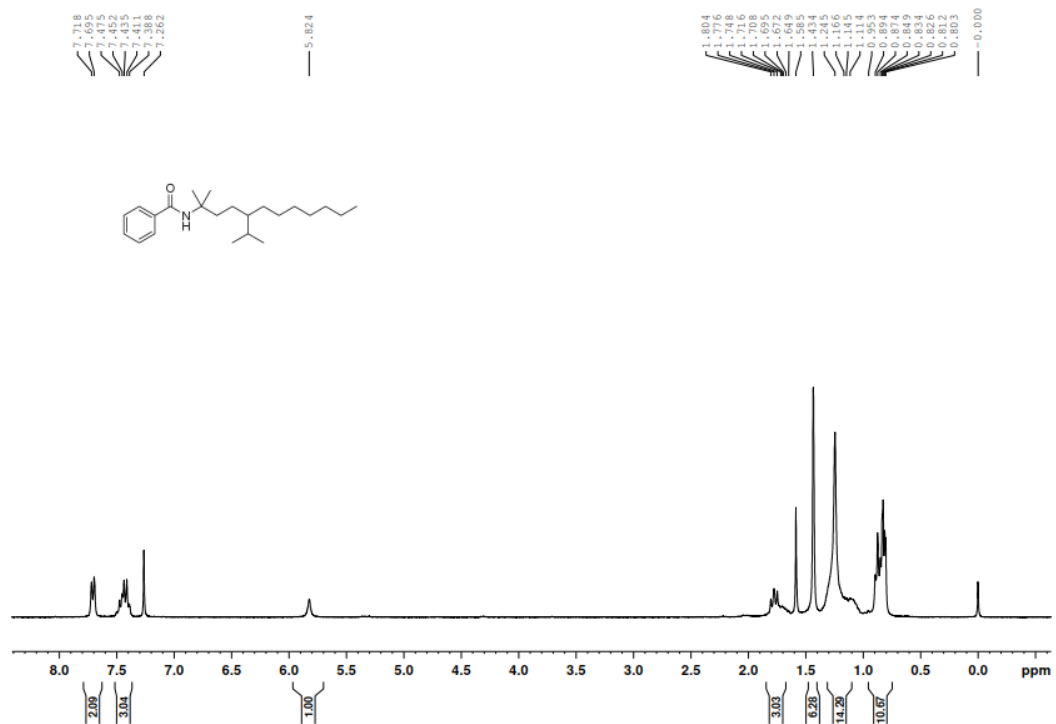

Supplementary Figure 222. <sup>1</sup>H NMR (300 MHz, CDCl<sub>3</sub>) spectra for compound 12b.

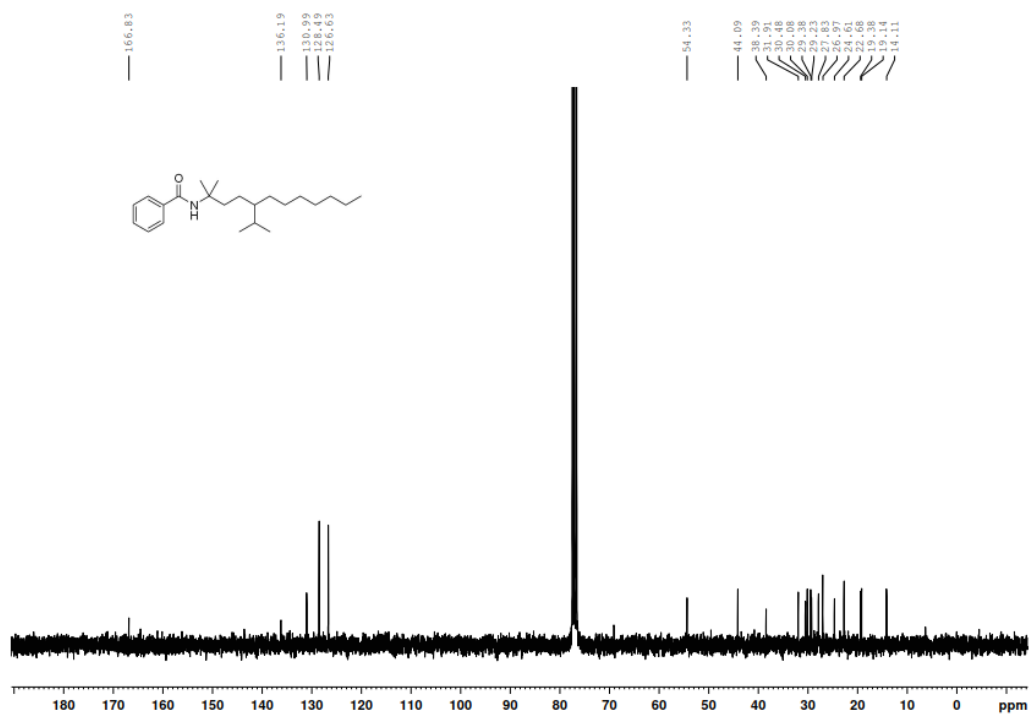

Supplementary Figure 223. <sup>13</sup>C NMR (75 MHz, CDCl<sub>3</sub>) spectra for compound 12b.

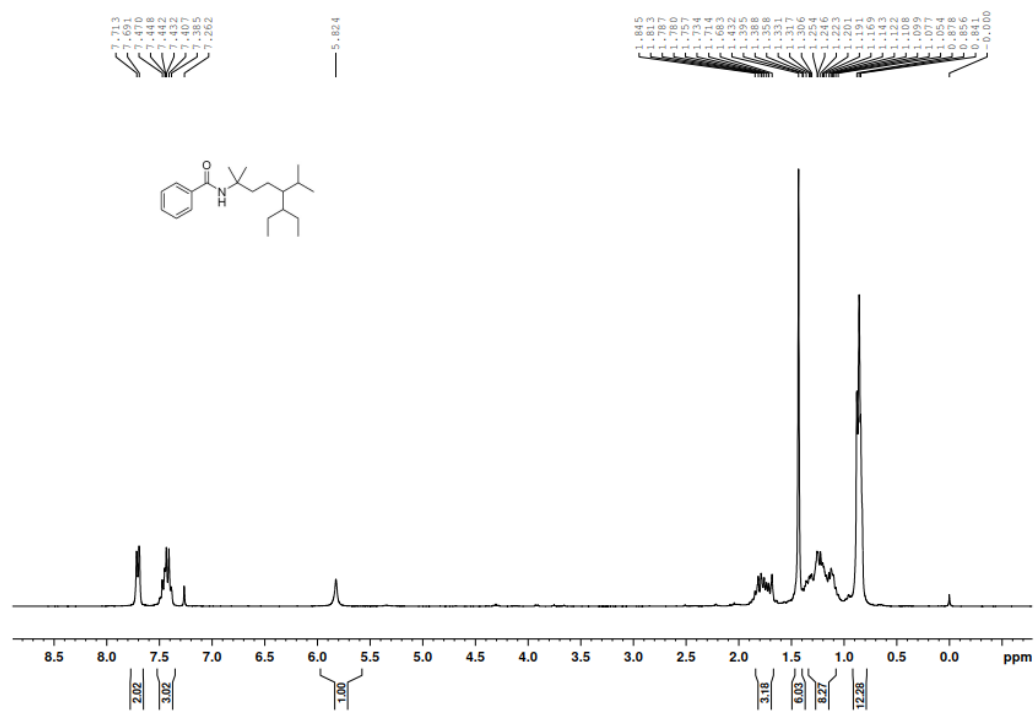

Supplementary Figure 224. <sup>1</sup>H NMR (300 MHz, CDCl<sub>3</sub>) spectra for compound 12c.

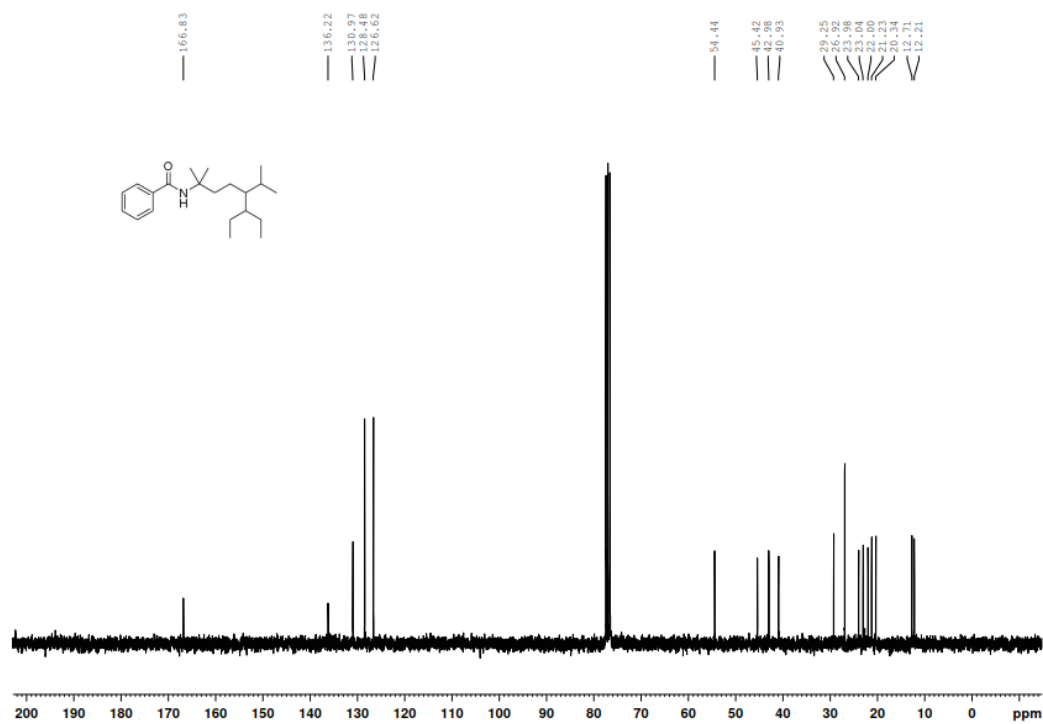

Supplementary Figure 225. <sup>13</sup>C NMR (75 MHz, CDCl<sub>3</sub>) spectra for compound 12c.

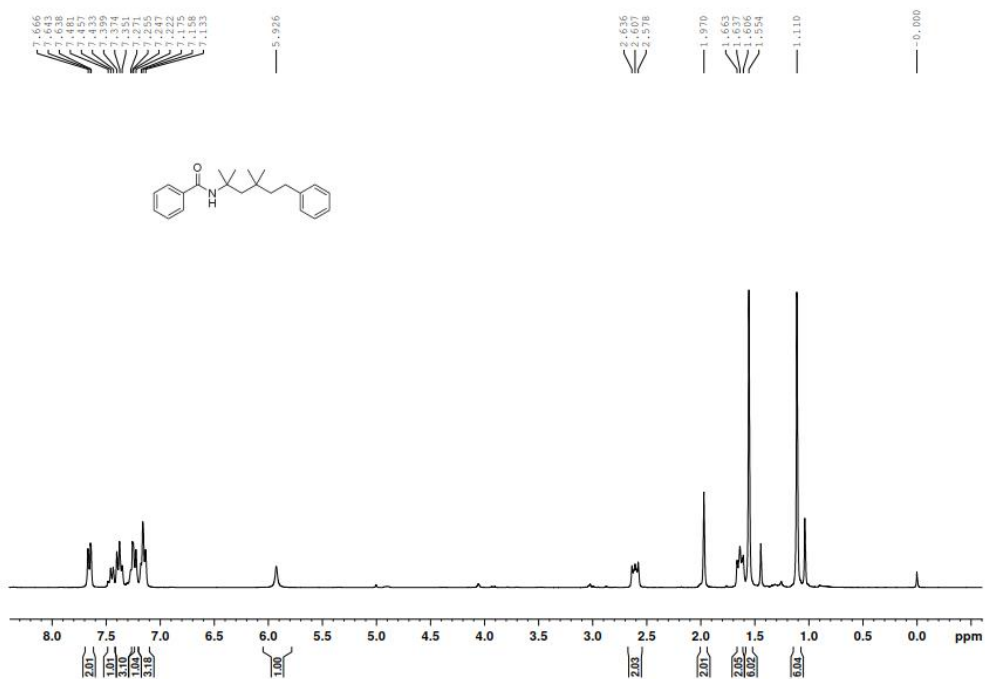

Supplementary Figure 226. <sup>1</sup>H NMR (300 MHz, CDCl<sub>3</sub>) spectra for compound 12d.

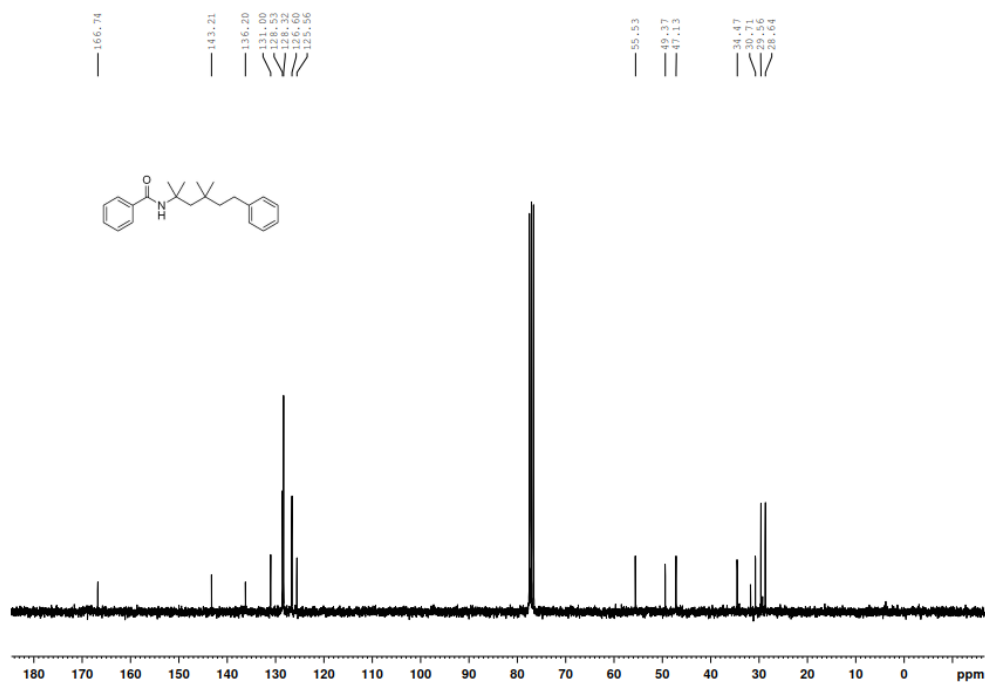

Supplementary Figure 227. <sup>13</sup>C NMR (75 MHz, CDCl<sub>3</sub>) spectra for compound 12d.

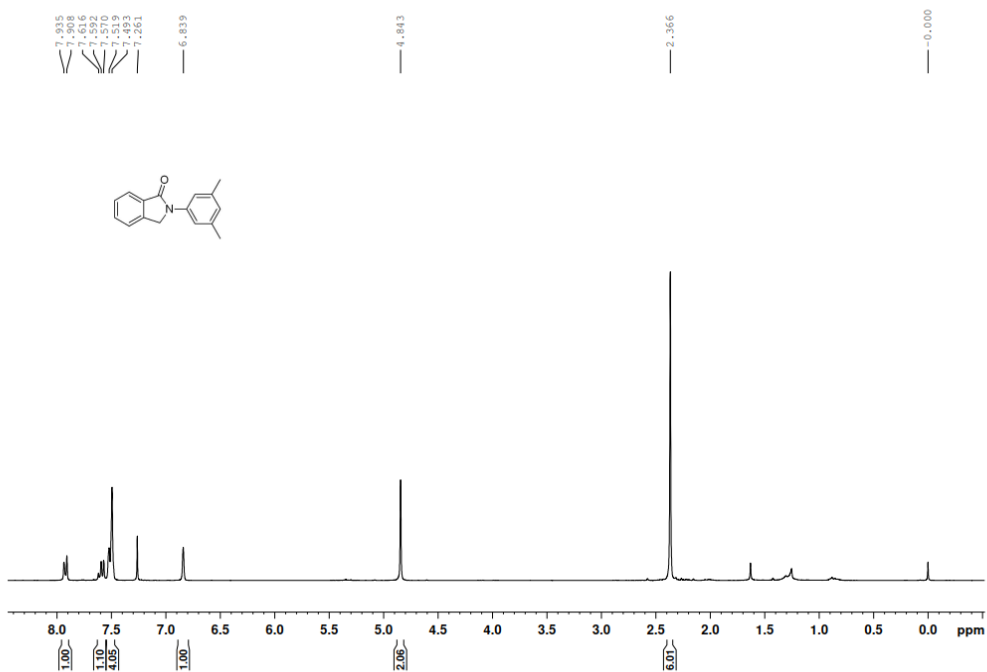

Supplementary Figure 228. <sup>1</sup>H NMR (300 MHz, CDCl<sub>3</sub>) spectra for compound 3f'.

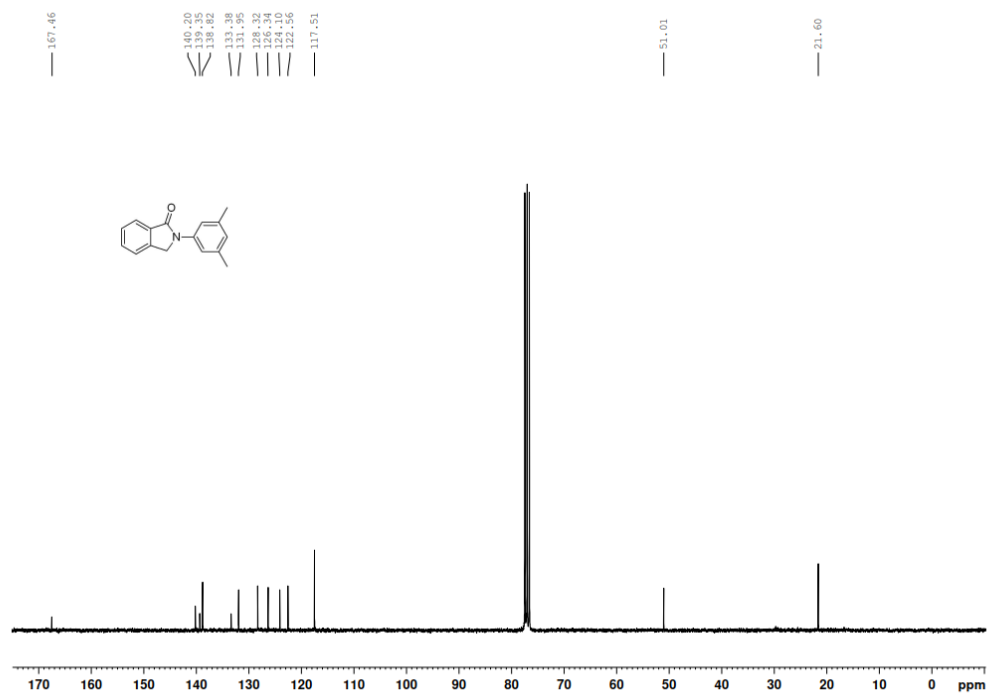

Supplementary Figure 229. <sup>13</sup>C NMR (75 MHz, CDCl<sub>3</sub>) spectra for compound 3f'.

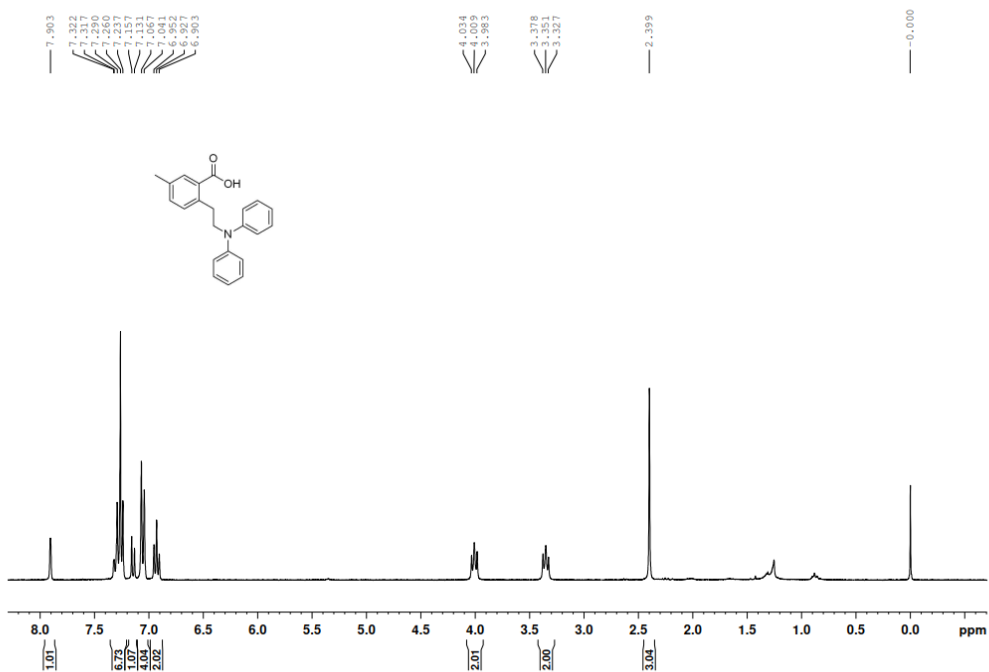

Supplementary Figure 230. <sup>1</sup>H NMR (300 MHz, CDCl<sub>3</sub>) spectra for compound 4s'.

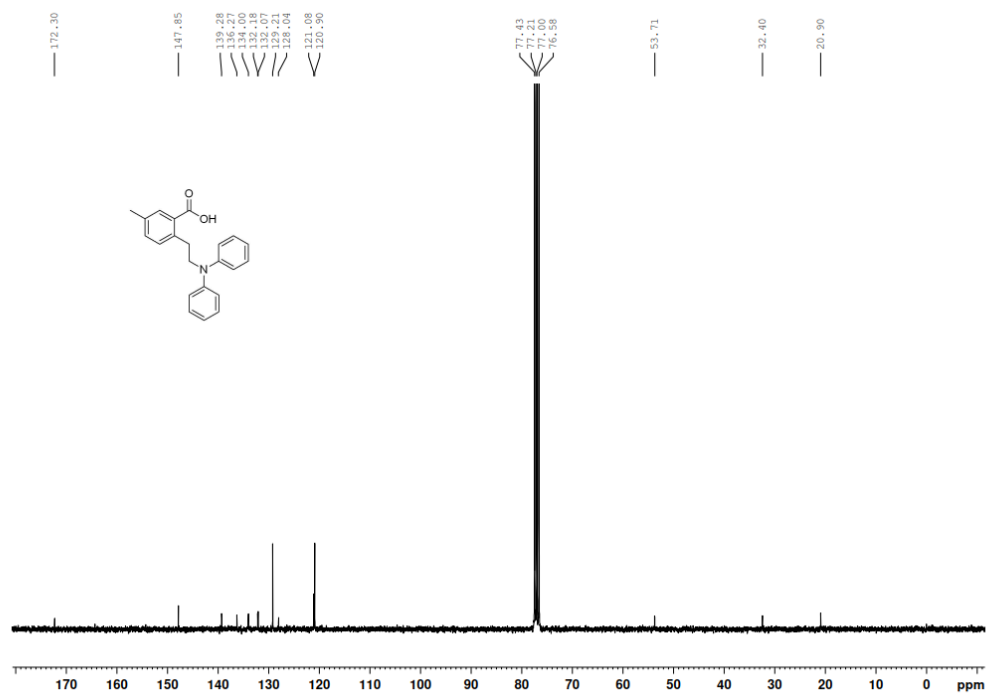

Supplementary Figure 231. <sup>13</sup>C NMR (75 MHz, CDCl<sub>3</sub>) spectra for compound 4s'.

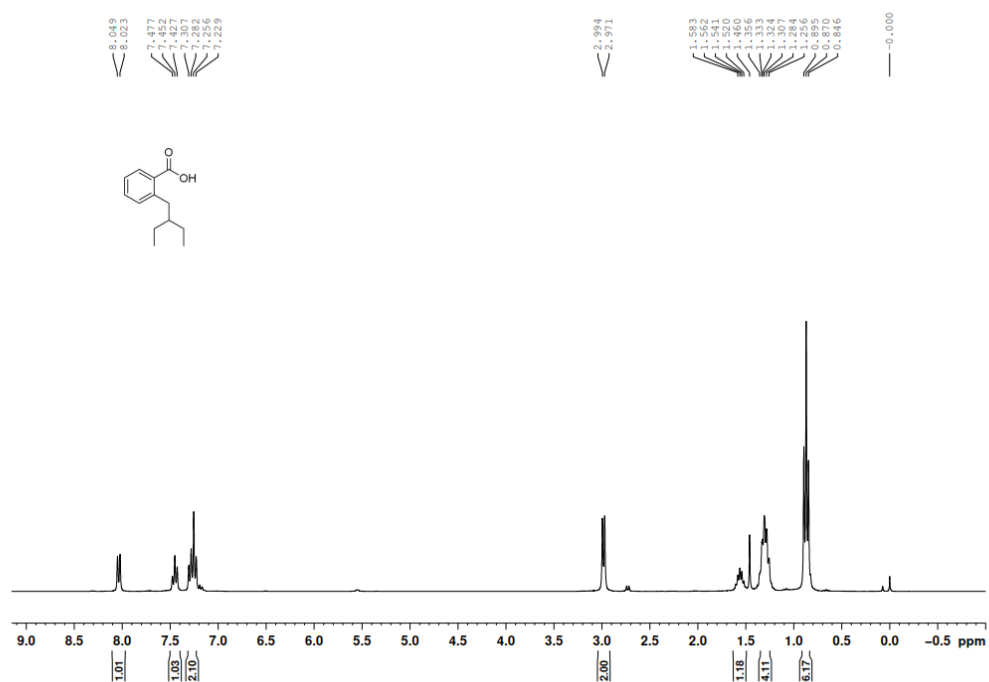

Supplementary Figure 232. <sup>1</sup>H NMR (300 MHz, CDCl<sub>3</sub>) spectra for compound 10b'.

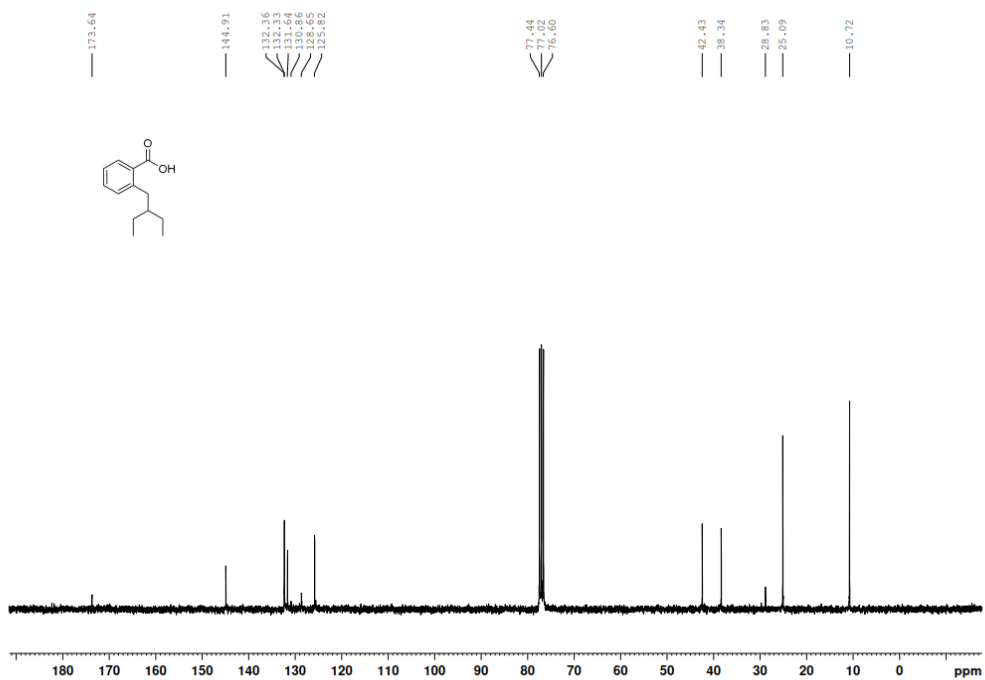

Supplementary Figure 233. <sup>13</sup>C NMR (75 MHz, CDCl<sub>3</sub>) spectra for compound 10b'.

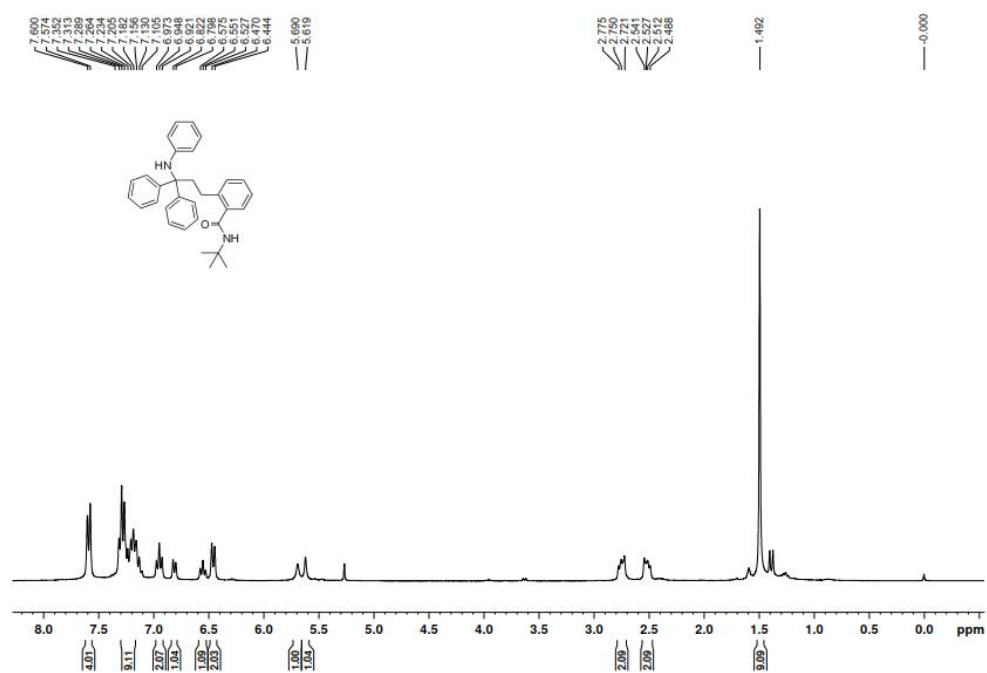

Supplementary Figure 234.  $^1\text{H}$  NMR (300 MHz,  $\text{CDCl}_3$ ) spectra for compound 13.

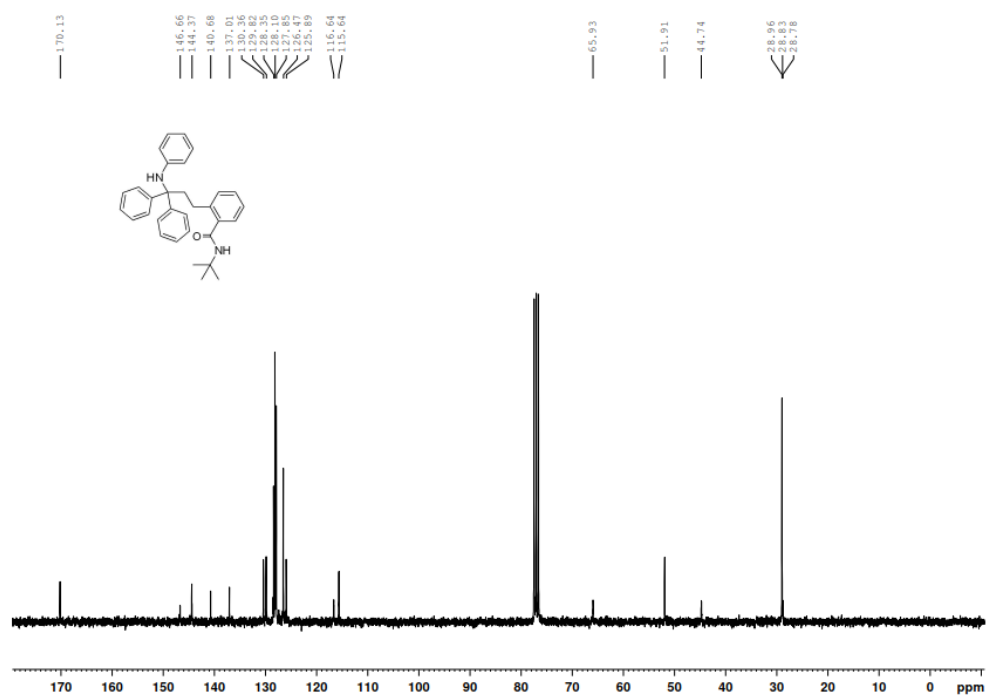

Supplementary Figure 235.  $^{13}\text{C}$  NMR (75 MHz,  $\text{CDCl}_3$ ) spectra for compound 13.



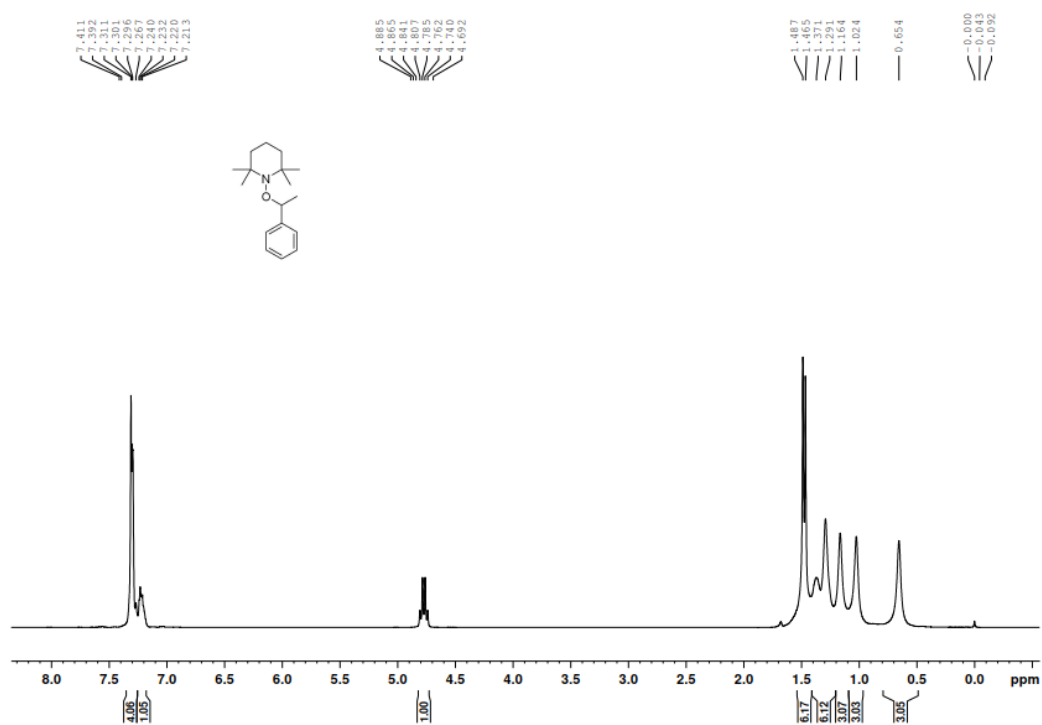

Supplementary Figure 236. <sup>1</sup>H NMR (300 MHz, CDCl<sub>3</sub>) spectra for compound 16.

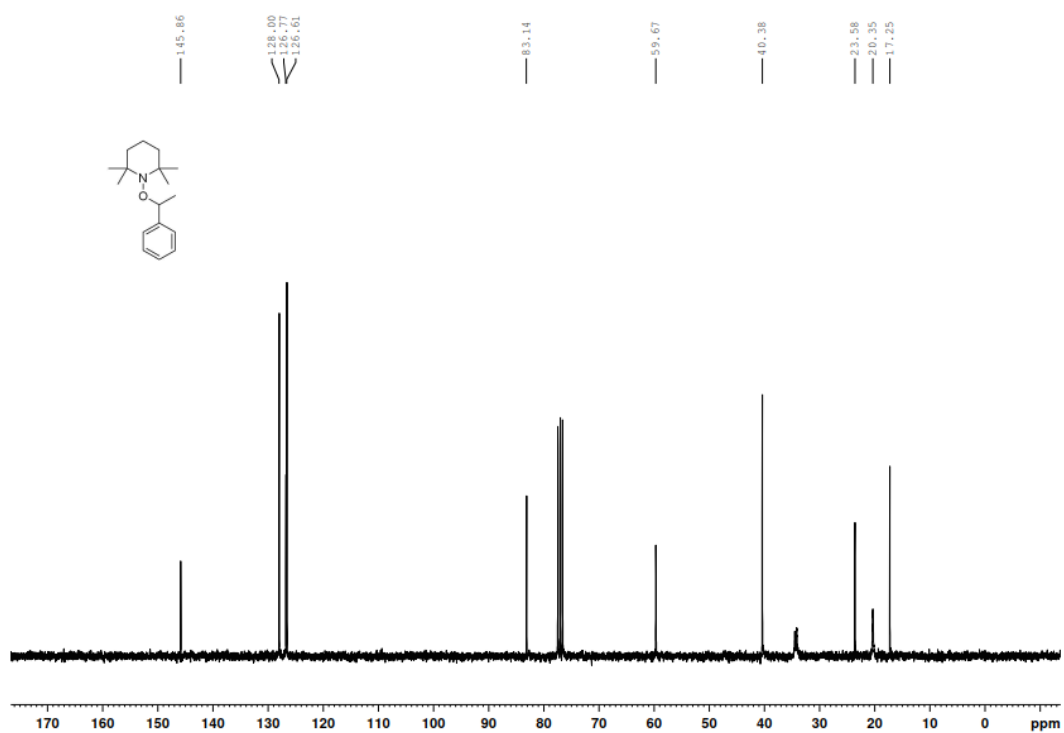

Supplementary Figure 237. <sup>13</sup>C NMR (75 MHz, CDCl<sub>3</sub>) spectra for compound 16.

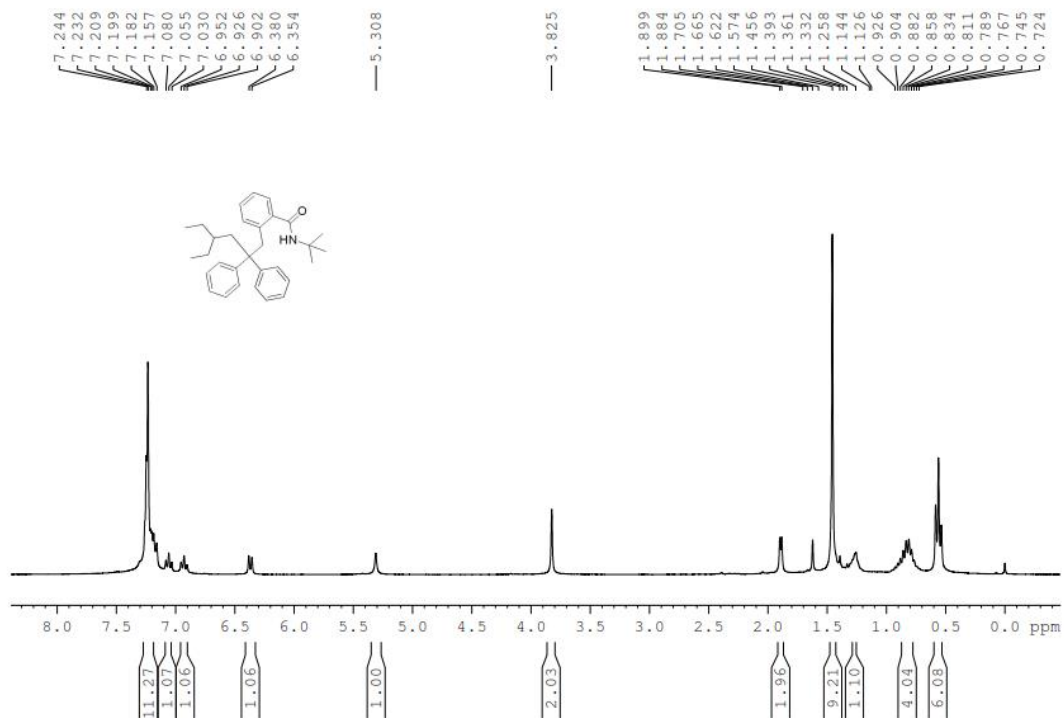

Supplementary Figure 238. <sup>1</sup>H NMR (300 MHz, CDCl<sub>3</sub>) spectra for compound 17.

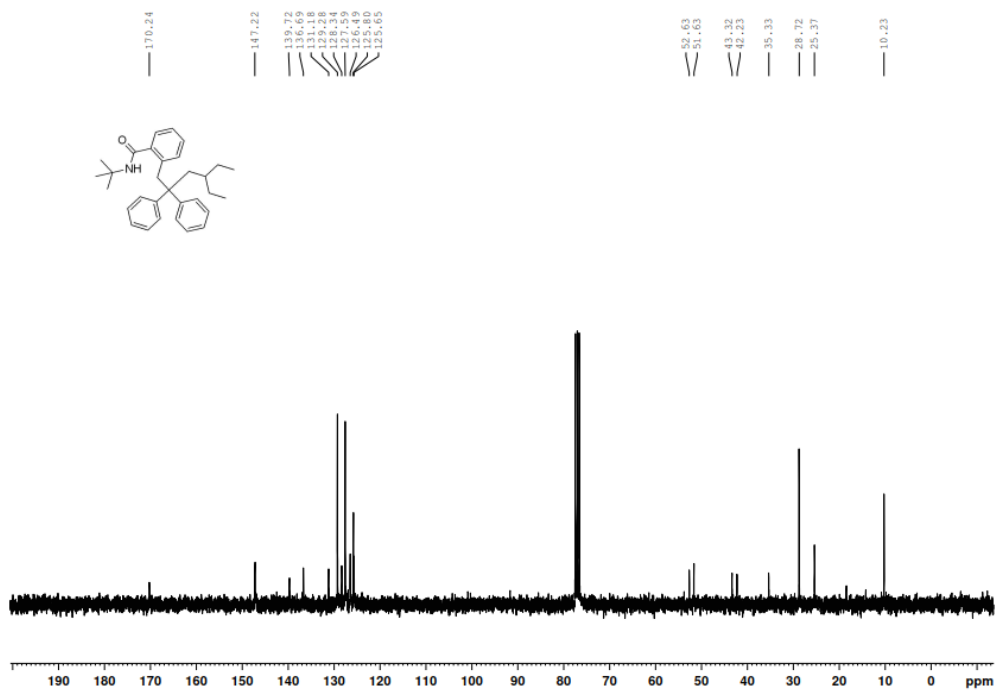

Supplementary Figure 239. <sup>13</sup>C NMR (75 MHz, CDCl<sub>3</sub>) spectra for compound 17.

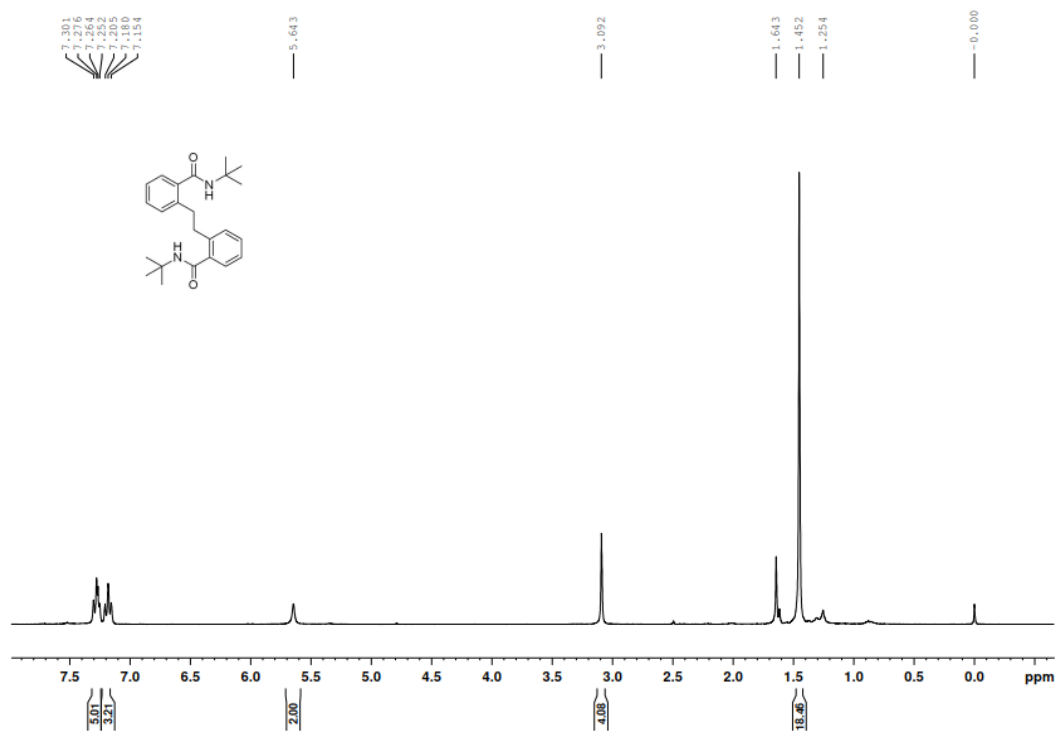

Supplementary Figure 240. <sup>1</sup>H NMR (300 MHz, CDCl<sub>3</sub>) spectra for compound 14.

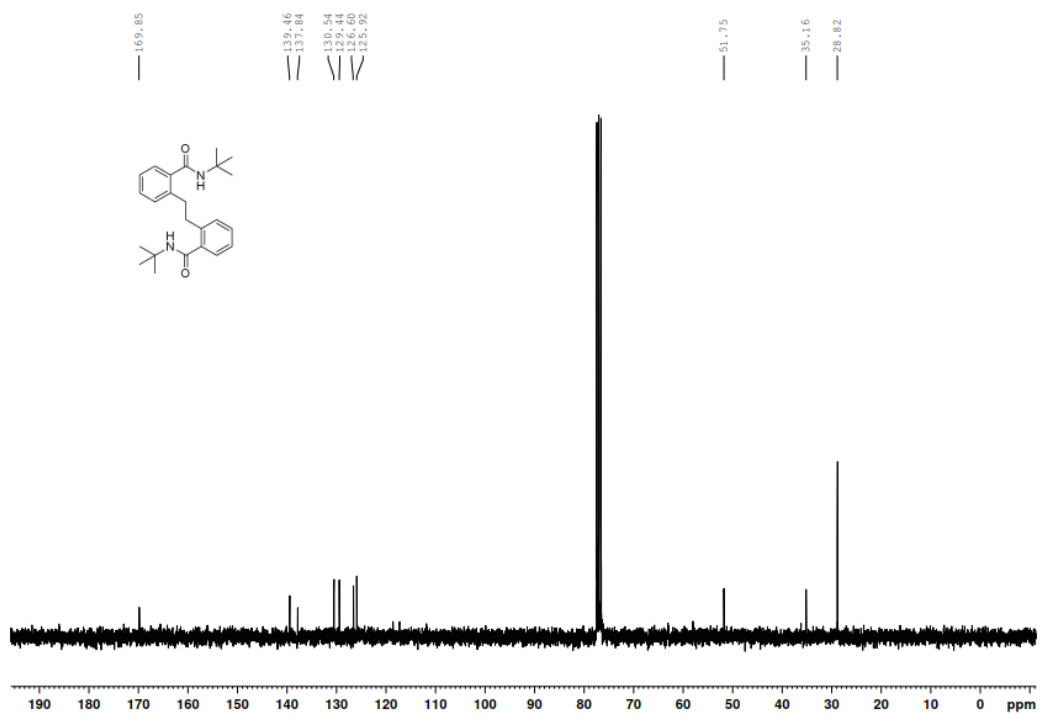

Supplementary Figure 241. <sup>13</sup>C NMR (75 MHz, CDCl<sub>3</sub>) spectra for compound 14.

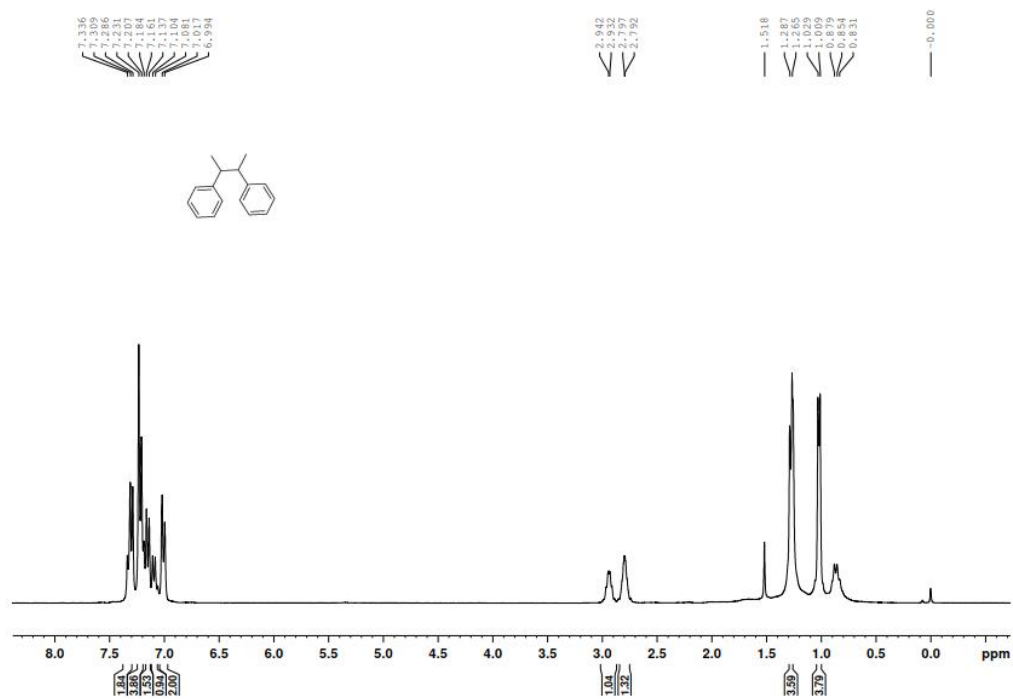

Supplementary Figure 242. <sup>1</sup>H NMR (300 MHz, CDCl<sub>3</sub>) spectra for compound 18.

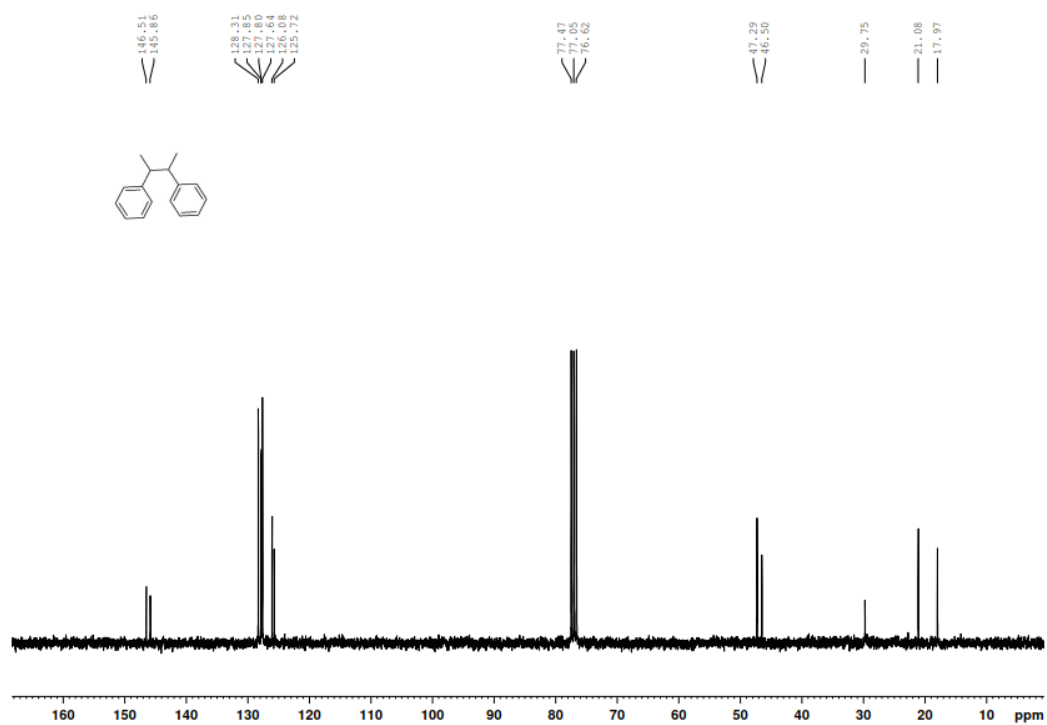

Supplementary Figure 243. <sup>13</sup>C NMR (75 MHz, CDCl<sub>3</sub>) spectra for compound 18.

## Supplementary References.

1. Groendyke, B. J., AbuSalim, D. I. & Cook, S. P. Iron-catalyzed, fluoroamide-directed C–H fluorination. *J. Am. Chem. Soc.* **138**, 12771–12774 (2016).
2. Xie, J., Yu, J., Rudolph, Rominger, M., F. & Hashmi, A. S. K. Mono fluoroalkenylation of dimethylamino compounds through radical-radical cross-coupling. *Angew. Chem. Int. Ed.* **55**, 9416–9421 (2016).
3. Chen, W., Liu, Z., Tian, J., Li, J., Ma, J., Cheng, X. & Li, G. Building congested ketone: substituted Hantzsch ester and nitrile as alkylation reagents in photoredox catalysis. *J. Am. Chem. Soc.* **138**, 12312–12315 (2016).
4. Kim, H. & Chang, S. Iridium-catalyzed direct C–H amination with alkylamines: facile oxidative insertion of amino group into iridacycle. *ACS Catal.* **5**, 6665–6669 (2015).
5. Li, S., Wang, B., Dong, G., Li, C. & Liu, H. Cobalt-catalyzed C(sp<sup>3</sup>)–H/C(sp<sup>2</sup>)–H oxidative coupling between alkanes and benzamides. *RSC Adv.* **8**, 13454–13458 (2018).
6. Zhao, Y., Huang, B., Yang, C., Li, B., Gou, B., & Xia, W. Photocatalytic cross-dehydrogenative amination reactions between phenols and diarylamines. *ACS Catal.* **7**, 2446–2451 (2017).
7. Jin, J. & MacMillan, D. W. C. Alcohols as alkylating agents in heteroarene C–H functionalization. *Nature*, **525**, 87–90 (2015).
8. Lowry, M. S., Goldsmith, J. I., Slinker, J. D., Rohl, R., Pascal, R. A., Malliaras, G. G. & Bernhard, S. Single-layer electroluminescent devices and photoinduced hydrogen production from an ionic iridium(III) complex. *Chem. Mater.* **17**, 5712–5719 (2005).
9. Slinker, J. D., Gorodetsky, A. A., Lowry, M. S., Wang, J., Parker, S., Rohl, R., Bernhard, S. & Malliaras, G. G. Efficient yellow electroluminescence from a single layer of a cyclometalated iridium complex. *J. Am. Chem. Soc.* **126**, 2763–2767 (2004).
